# Supplementary material for: Wolf outside, dog inside? The genomic make-up of the Czechoslovakian Wolfdog
Source: PubMed Central journal article supplement (PMC6043967; doi:10.1186/s12864-018-4916-2), 2018-07-13

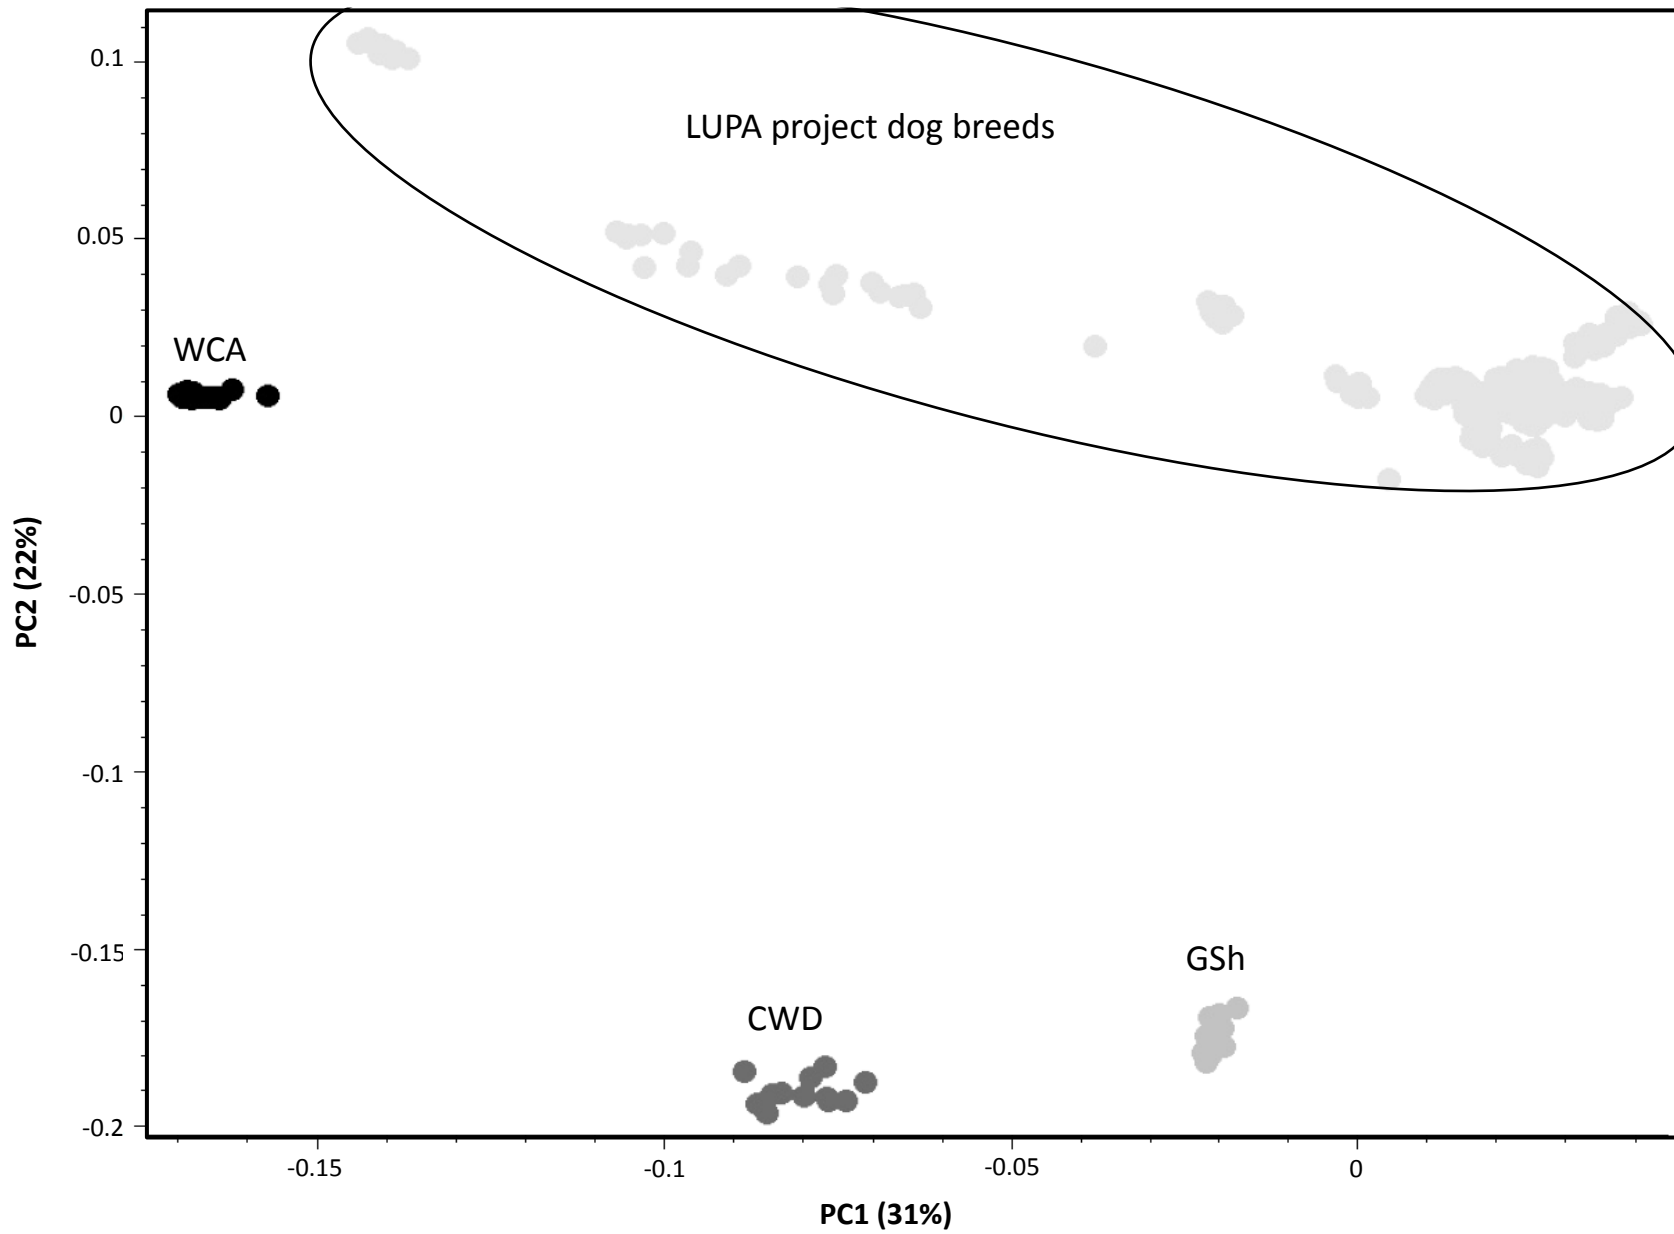

Supplement: 12864_2018_4916_MOESM3_ESM.pdf [file 12864_2018_4916_MOESM3_ESM.pdf]
