# Supplementary material for: Wolf outside, dog inside? The genomic make-up of the Czechoslovakian Wolfdog
Source: BMC Genomics. 2018 Jul 13;19:533. doi: 10.1186/s12864-018-4916-2 (PMC6043967; doi:10.1186/s12864-018-4916-2)
Supplement: Supplementary file 7 — Table S1a. Wolf-excess genes surrounding outlier wolf-like SNPs (OWS) from PCAdmix. Table S1b. Enrichment in gene ontology categories (EGO) of wolf-excess genes surrounding the OWS from PCAdmix. Table S1c. Dog-excess genes surrounding outlier dog-like SNPs (ODS) from PCAdmix. Table S1d. EGO of dog-excess genes surrounding ODS from PCAdmix. Table S2a. Dog-excess genes included in genomic regions within ROHs. Table S2b. EGO of the dog-excess genes included in genomic regions within ROHs. Table S3a. Wolf-excess genes surrounding OWS from the lowest FST between CWDs and Carpathian wolves. Table S3b. EGO of wolf-excess genes surrounding OWS from the lowest FST between CWDs and Carpathian wolves. Table S3c. Dog-excess genes surrounding ODS from the lowest FST between CWDs and German Shepherds. Table S3d. EGO of dog-excess genes surrounding ODS from the lowest FST between CWDs and German Shepherds. Table S4a. Wolf-excess genes surrounding the outlier wolf-like 10-SNP blocks identified from the lowest FST between CWDs and Carpathian wolves. Table S4b. EGO of the wolf-excess genes surrounding the outlier wolf-like 10-SNP blocks identified from the lowest FST between CWDs and Carpathian wolves. Table S4c. Dog-excess genes surrounding outlier dog-like 10-SNP blocks from the lowest FST between CWDs and German Shepherds. Table S4d. EGO of dog-excess genes surrounding outlier dog-like 10-SNP blocks from the lowest FST between CWDs and German Shepherds. Table S5a. Wolf-excess genes surrounding OWS from BGC alpha parameter. Table S5b. EGO of wolf-excess genes surrounding OWS from BGC alpha parameter. Table S5c. Dog-excess genes surrounding ODS from BGC alpha parameter. Table S5d. EGO of dog-excess genes surrounding ODS from BGC alpha parameter. Table S6a. Wolf-excess surrounding OWS from BayeScan. Table S6b. EGO of wolf-excess genes surrounding OWS from BayeScan. Table S6c. Dog-excess genes surrounding ODS from BayeScan. Table S6d. EGO of dog-excess genes surrounding ODS from BayeS [file 12864_2018_4916_MOESM7_ESM.xlsx]

## Sheet: Table S1a
	Table S1a Wolf excess genes surrounding the outlier wolf-like SNPs identified from PCADMIX
	Ensembl Gene ID	Associated Gene Name	Associated Gene Name + Wiki	Chromosome Name	Gene Start (bp)	Gene End (bp)	Strand	Phenotype description	WikiGene Name	WikiGene Description	Description	Method
	ENSCAFG00000013288	ADAMTSL3	ADAMTSL3	3	55358797	55695236	1				ADAMTS like 3 [Source:HGNC Symbol;Acc:HGNC:14633]	PCAdmix_WOLF
	ENSCAFG00000013301	SAXO2	SAXO2	3	55701926	55720392	-1		SAXO2	stabilizer of axonemal microtubules 2	stabilizer of axonemal microtubules 2 [Source:HGNC Symbol;Acc:HGNC:33727]	PCAdmix_WOLF
	ENSCAFG00000013671	EFL1	EFL1	3	55721013	55841801	1		EFTUD1	elongation factor Tu GTP binding domain containing 1	elongation factor like GTPase 1 [Source:HGNC Symbol;Acc:HGNC:25789]	PCAdmix_WOLF
	ENSCAFG00000013759	MEX3B	MEX3B	3	55911163	55915517	1		MEX3B	mex-3 RNA binding family member B	mex-3 RNA binding family member B [Source:HGNC Symbol;Acc:HGNC:25297]	PCAdmix_WOLF
	ENSCAFG00000016329			3	77966681	77967260	-1					PCAdmix_WOLF
	ENSCAFG00000029135	GDNF	GDNF	4	70966214	70992485	1	Neonatal encephalopathy with seizures	GDNF	glial cell derived neurotrophic factor	glial cell derived neurotrophic factor [Source:HGNC Symbol;Acc:HGNC:4232]	PCAdmix_WOLF
	ENSCAFG00000018675	WDR70	WDR70	4	71027472	71330814	-1				WD repeat domain 70 [Source:HGNC Symbol;Acc:HGNC:25495]	PCAdmix_WOLF
	ENSCAFG00000018679			4	71232574	71233218	1					PCAdmix_WOLF
	ENSCAFG00000018684	NUP155	NUP155	4	71340271	71408035	1		NUP155	nucleoporin 155kDa	nucleoporin 155 [Source:HGNC Symbol;Acc:HGNC:8063]	PCAdmix_WOLF
	ENSCAFG00000018685	C5orf42	C5orf42	4	71430719	71566921	1				chromosome 5 open reading frame 42 [Source:HGNC Symbol;Acc:HGNC:25801]	PCAdmix_WOLF
	ENSCAFG00000018695	NIPBL	NIPBL	4	71579120	71697274	-1		NIPBL	Nipped-B homolog (Drosophila)	NIPBL, cohesin loading factor [Source:HGNC Symbol;Acc:HGNC:28862]	PCAdmix_WOLF
	ENSCAFG00000018704	GLAST	GLAST	4	71935576	72014333	-1		SLC1A3	solute carrier family 1 (glial high affinity glutamate transporter), member 3	solute carrier family 1 member 3 [Source:HGNC Symbol;Acc:HGNC:10941]	PCAdmix_WOLF
	ENSCAFG00000029561			4	71939015	72077309	1					PCAdmix_WOLF
	ENSCAFG00000018711	RANBP3L	RANBP3L	4	72248396	72339209	1		RANBP3L	RAN binding protein 3-like	RAN binding protein 3 like [Source:HGNC Symbol;Acc:HGNC:26353]	PCAdmix_WOLF
	ENSCAFG00000018725	SKP2	SKP2	4	72352810	72386546	-1		SKP2	S-phase kinase-associated protein 2, E3 ubiquitin protein ligase	S-phase kinase-associated protein 2, E3 ubiquitin protein ligase [Source:HGNC Symbol;Acc:HGNC:10901]	PCAdmix_WOLF
	ENSCAFG00000018731	LMBRD2	LMBRD2	4	72386599	72425020	1		LMBRD2	LMBR1 domain containing 2	LMBR1 domain containing 2 [Source:HGNC Symbol;Acc:HGNC:25287]	PCAdmix_WOLF
	ENSCAFG00000023144		LOC100855676	4	72461733	72480224	1		LOC100855676	UDP-glucuronosyltransferase 3A1-like		PCAdmix_WOLF
	ENSCAFG00000032039			4	72481695	72577186	1					PCAdmix_WOLF
	ENSCAFG00000018745	CAPSL	CAPSL	4	72603742	72613106	1				calcyphosine like [Source:HGNC Symbol;Acc:HGNC:28375]	PCAdmix_WOLF
	ENSCAFG00000018752	IL7R	IL7R	4	72636594	72664667	-1		IL7R	interleukin 7 receptor	interleukin 7 receptor [Source:HGNC Symbol;Acc:HGNC:6024]	PCAdmix_WOLF
	ENSCAFG00000018767	SPEF2	SPEF2	4	72699521	72864102	-1		SPEF2	sperm flagellar 2	sperm flagellar 2 [Source:HGNC Symbol;Acc:HGNC:26293]	PCAdmix_WOLF
	ENSCAFG00000018782	PRLR	PRLR	4	73110899	73273626	1		PRLR	prolactin receptor	prolactin receptor [Source:HGNC Symbol;Acc:HGNC:9446]	PCAdmix_WOLF
	ENSCAFG00000018790	AGXT2	AGXT2	4	73292199	73327736	1		AGXT2	alanine--glyoxylate aminotransferase 2	alanine--glyoxylate aminotransferase 2 [Source:HGNC Symbol;Acc:HGNC:14412]	PCAdmix_WOLF
	ENSCAFG00000018794	DNAJC21	DNAJC21	4	73348960	73372081	-1		DNAJC21	DnaJ (Hsp40) homolog, subfamily C, member 21	DnaJ heat shock protein family (Hsp40) member C21 [Source:HGNC Symbol;Acc:HGNC:27030]	PCAdmix_WOLF
	ENSCAFG00000018797	BRIX1	BRIX1	4	73375452	73386632	-1		BRIX1	BRX1, biogenesis of ribosomes	BRX1, biogenesis of ribosomes [Source:HGNC Symbol;Acc:HGNC:24170]	PCAdmix_WOLF
	ENSCAFG00000018802	RAD1	RAD1	4	73386074	73392095	1		RAD1	RAD1 checkpoint DNA exonuclease	RAD1 checkpoint DNA exonuclease [Source:HGNC Symbol;Acc:HGNC:9806]	PCAdmix_WOLF
	ENSCAFG00000018809	TTC23L	TTC23L	4	73400141	73453838	-1		TTC23L	tetratricopeptide repeat domain 23-like	tetratricopeptide repeat domain 23 like [Source:HGNC Symbol;Acc:HGNC:26355]	PCAdmix_WOLF
	ENSCAFG00000018816	RAI14	RAI14	4	73462523	73599526	-1		RAI14	retinoic acid induced 14	retinoic acid induced 14 [Source:HGNC Symbol;Acc:HGNC:14873]	PCAdmix_WOLF
	ENSCAFG00000030623	LAYN	LAYN	5	21508078	21531641	-1		LAYN	layilin	layilin [Source:HGNC Symbol;Acc:HGNC:29471]	PCAdmix_WOLF
	ENSCAFG00000014208	C11orf88	C11orf88	5	21534079	21561496	-1		C5H11orf88	chromosome 5 open reading frame, human C11orf88	chromosome 11 open reading frame 88 [Source:HGNC Symbol;Acc:HGNC:25061]	PCAdmix_WOLF
	ENSCAFG00000014210	BTG4	BTG4	5	21559298	21593125	1				BTG family member 4 [Source:HGNC Symbol;Acc:HGNC:13862]	PCAdmix_WOLF
	ENSCAFG00000014213	POU2AF1	POU2AF1	5	21671558	21695759	1		POU2AF1	POU class 2 associating factor 1	POU class 2 associating factor 1 [Source:HGNC Symbol;Acc:HGNC:9211]	PCAdmix_WOLF
	ENSCAFG00000024433	COLCA2	COLCA2	5	21731398	21734827	-1		COLCA2	colorectal cancer associated 2	colorectal cancer associated 2 [Source:HGNC Symbol;Acc:HGNC:26978]	PCAdmix_WOLF
	ENSCAFG00000014215	C11orf53	C11orf53	5	21746582	21785260	-1		C5H11orf53	chromosome 5 open reading frame, human C11orf53	chromosome 11 open reading frame 53 [Source:HGNC Symbol;Acc:HGNC:30527]	PCAdmix_WOLF
	ENSCAFG00000032101		RPL39	5	21948875	21949027	-1		RPL39	ribosomal protein L39		PCAdmix_WOLF
	ENSCAFG00000014221	ARHGAP20	ARHGAP20	5	22249219	22372007	1		ARHGAP20	Rho GTPase activating protein 20	Rho GTPase activating protein 20 [Source:HGNC Symbol;Acc:HGNC:18357]	PCAdmix_WOLF
	ENSCAFG00000014234		LOC102154781	5	22317963	22318754	-1		LOC102154781	40S ribosomal protein S4-like		PCAdmix_WOLF
	ENSCAFG00000014236	FDX1	FDX1	5	22453524	22485402	-1				ferredoxin 1 [Source:HGNC Symbol;Acc:HGNC:3638]	PCAdmix_WOLF
	ENSCAFG00000014273	RDX	RDX	5	22571295	22642863	1		RDX	radixin	radixin [Source:HGNC Symbol;Acc:HGNC:9944]	PCAdmix_WOLF
	ENSCAFG00000030803			5	22624894	22626603	-1					PCAdmix_WOLF
	ENSCAFG00000014297	ZC3H12C	ZC3H12C	5	22671673	22714631	-1		ZC3H12C	zinc finger CCCH-type containing 12C	zinc finger CCCH-type containing 12C [Source:HGNC Symbol;Acc:HGNC:29362]	PCAdmix_WOLF
	ENSCAFG00000023392	C11orf87	C11orf87	5	23288441	23289037	-1		C5H11orf87	chromosome 5 open reading frame, human C11orf87	chromosome 11 open reading frame 87 [Source:HGNC Symbol;Acc:HGNC:33788]	PCAdmix_WOLF
	ENSCAFG00000014324	DDX10	DDX10	5	23677803	23932055	-1		DDX10	DEAD (Asp-Glu-Ala-Asp) box polypeptide 10	DEAD-box helicase 10 [Source:HGNC Symbol;Acc:HGNC:2735]	PCAdmix_WOLF
	ENSCAFG00000014570	ACAT1	ACAT1	5	24361478	24457965	-1		ACAT1	acetyl-CoA acetyltransferase 1	acetyl-CoA acetyltransferase 1 [Source:HGNC Symbol;Acc:HGNC:93]	PCAdmix_WOLF
	ENSCAFG00000014613	CUL5	CUL5	5	24393400	24477717	-1		CUL5	cullin 5	cullin 5 [Source:HGNC Symbol;Acc:HGNC:2556]	PCAdmix_WOLF
	ENSCAFG00000032014	RAB39A	RAB39A	5	24514901	24546808	-1				RAB39A, member RAS oncogene family [Source:HGNC Symbol;Acc:HGNC:16521]	PCAdmix_WOLF
	ENSCAFG00000014668	SLC35F2	SLC35F2	5	24607205	24658916	1		SLC35F2	solute carrier family 35, member F2	solute carrier family 35 member F2 [Source:HGNC Symbol;Acc:HGNC:23615]	PCAdmix_WOLF
	ENSCAFG00000014676	ELMOD1	ELMOD1	5	24747808	24792550	-1		ELMOD1	ELMO/CED-12 domain containing 1	ELMO domain containing 1 [Source:HGNC Symbol;Acc:HGNC:25334]	PCAdmix_WOLF
	ENSCAFG00000014696	ALKBH8	ALKBH8	5	24843268	24900584	1		ALKBH8	alkB homolog 8, tRNA methyltransferase	alkB homolog 8, tRNA methyltransferase [Source:HGNC Symbol;Acc:HGNC:25189]	PCAdmix_WOLF
	ENSCAFG00000014718	CWF19L2	CWF19L2	5	24936579	25084610	1		CWF19L2	CWF19-like 2, cell cycle control (S. pombe)	CWF19-like 2, cell cycle control (S. pombe) [Source:HGNC Symbol;Acc:HGNC:26508]	PCAdmix_WOLF
	ENSCAFG00000014739	GUCY1A2	GUCY1A2	5	25291583	25718560	1				guanylate cyclase 1, soluble, alpha 2 [Source:HGNC Symbol;Acc:HGNC:4684]	PCAdmix_WOLF
	ENSCAFG00000014760	MRPS36	MRPS36	5	25834145	25834456	-1		MRPS36	mitochondrial ribosomal protein S36	mitochondrial ribosomal protein S36 [Source:HGNC Symbol;Acc:HGNC:16631]	PCAdmix_WOLF
	ENSCAFG00000001472			5	25990858	25991925	-1					PCAdmix_WOLF
	ENSCAFG00000018897	JUN	JUN	5	50967818	50968843	1		JUN	jun proto-oncogene	Jun proto-oncogene, AP-1 transcription factor subunit [Source:HGNC Symbol;Acc:HGNC:6204]	PCAdmix_WOLF
	ENSCAFG00000018906	MYSM1	MYSM1	5	51040842	51074039	1		MYSM1	Myb-like, SWIRM and MPN domains 1	Myb like, SWIRM and MPN domains 1 [Source:HGNC Symbol;Acc:HGNC:29401]	PCAdmix_WOLF
	ENSCAFG00000018911	OMA1	OMA1	5	51151405	51213976	1		OMA1	OMA1 zinc metallopeptidase	OMA1 zinc metallopeptidase [Source:HGNC Symbol;Acc:HGNC:29661]	PCAdmix_WOLF
	ENSCAFG00000019477	MEGF6	MEGF6	5	58058240	58146134	-1		MEGF6	multiple EGF-like-domains 6	multiple EGF like domains 6 [Source:HGNC Symbol;Acc:HGNC:3232]	PCAdmix_WOLF
	ENSCAFG00000019485	WRAP73	WRAP73	5	58156847	58176197	-1		WRAP73	WD repeat containing, antisense to TP73	WD repeat containing, antisense to TP73 [Source:HGNC Symbol;Acc:HGNC:12759]	PCAdmix_WOLF
	ENSCAFG00000019482	TPRG1L	TPRG1L	5	58156939	58158739	1				tumor protein p63 regulated 1-like [Source:HGNC Symbol;Acc:HGNC:27007]	PCAdmix_WOLF
	ENSCAFG00000019489	TP73	TP73	5	58188158	58243510	1		TP73	tumor protein p73	tumor protein p73 [Source:HGNC Symbol;Acc:HGNC:12003]	PCAdmix_WOLF
	ENSCAFG00000019491	CCDC27	CCDC27	5	58265463	58280896	1				coiled-coil domain containing 27 [Source:HGNC Symbol;Acc:HGNC:26546]	PCAdmix_WOLF
	ENSCAFG00000028639	SMIM1	SMIM1	5	58283961	58284422	1		SMIM1	small integral membrane protein 1 (Vel blood group)	small integral membrane protein 1 (Vel blood group) [Source:HGNC Symbol;Acc:HGNC:44204]	PCAdmix_WOLF
	ENSCAFG00000019492	LRRC47	LRRC47	5	58285615	58298039	-1		LRRC47	leucine rich repeat containing 47	leucine rich repeat containing 47 [Source:HGNC Symbol;Acc:HGNC:29207]	PCAdmix_WOLF
	ENSCAFG00000019498	CEP104	CEP104	5	58306589	58340113	-1		CEP104	centrosomal protein 104kDa	centrosomal protein 104 [Source:HGNC Symbol;Acc:HGNC:24866]	PCAdmix_WOLF
	ENSCAFG00000029838			5	58327472	58340113	1					PCAdmix_WOLF
	ENSCAFG00000019502	DFFB	DFFB	5	58340177	58355836	1		DFFB	DNA fragmentation factor, 40kDa, beta polypeptide (caspase-activated DNase)	DNA fragmentation factor subunit beta [Source:HGNC Symbol;Acc:HGNC:2773]	PCAdmix_WOLF
	ENSCAFG00000019504	C1orf174	C1orf174	5	58358489	58366411	-1		C5H1orf174	chromosome 5 open reading frame, human C1orf174	chromosome 1 open reading frame 174 [Source:HGNC Symbol;Acc:HGNC:27915]	PCAdmix_WOLF
	ENSCAFG00000019507	AJAP1	AJAP1	5	58907614	59015062	1		AJAP1	adherens junctions associated protein 1	adherens junctions associated protein 1 [Source:HGNC Symbol;Acc:HGNC:30801]	PCAdmix_WOLF
	ENSCAFG00000019514	NPHP4	NPHP4	5	59805955	59936808	-1	Cone-rod dystrophy Standard Wire-haired Dachshund	NPHP4	nephronophthisis 4	nephrocystin-4 [Source:RefSeq peptide;Acc:NP_001129260]	PCAdmix_WOLF
	ENSCAFG00000019524	KCNAB2	KCNAB2	5	59967948	60019148	1		KCNAB2	potassium channel, voltage gated subfamily A regulatory beta subunit 2	potassium voltage-gated channel subfamily A regulatory beta subunit 2 [Source:HGNC Symbol;Acc:HGNC:6229]	PCAdmix_WOLF
	ENSCAFG00000019545	CHD5	CHD5	5	60026537	60074429	-1		CHD5	chromodomain helicase DNA binding protein 5	chromodomain helicase DNA binding protein 5 [Source:HGNC Symbol;Acc:HGNC:16816]	PCAdmix_WOLF
	ENSCAFG00000019577	HES2	HES2	5	60051282	60279124	-1				hes family bHLH transcription factor 2 [Source:HGNC Symbol;Acc:HGNC:16005]	PCAdmix_WOLF
	ENSCAFG00000019567	RNF207	RNF207	5	60105378	60118670	1		RNF207	ring finger protein 207	ring finger protein 207 [Source:HGNC Symbol;Acc:HGNC:32947]	PCAdmix_WOLF
	ENSCAFG00000019572	GPR153	GPR153	5	60123054	60145729	-1				G protein-coupled receptor 153 [Source:HGNC Symbol;Acc:HGNC:23618]	PCAdmix_WOLF
	ENSCAFG00000019571	HES3	HES3	5	60135918	60136924	1				hes family bHLH transcription factor 3 [Source:HGNC Symbol;Acc:HGNC:26226]	PCAdmix_WOLF
	ENSCAFG00000019574	ACOT7	ACOT7	5	60150233	60223226	-1		ACOT7	acyl-CoA thioesterase 7	acyl-CoA thioesterase 7 [Source:HGNC Symbol;Acc:HGNC:24157]	PCAdmix_WOLF
	ENSCAFG00000019595	ESPN	ESPN	5	60285312	60315550	1		ESPN	espin	espin [Source:HGNC Symbol;Acc:HGNC:13281]	PCAdmix_WOLF
	ENSCAFG00000019599	TNFRSF25	TNFRSF25	5	60316688	60320464	-1				tumor necrosis factor receptor superfamily member 25 [Source:HGNC Symbol;Acc:HGNC:11910]	PCAdmix_WOLF
	ENSCAFG00000019602	PLEKHG5	PLEKHG5	5	60320850	60347393	-1		PLEKHG5	pleckstrin homology domain containing, family G (with RhoGef domain) member 5	pleckstrin homology and RhoGEF domain containing G5 [Source:HGNC Symbol;Acc:HGNC:29105]	PCAdmix_WOLF
	ENSCAFG00000019609	TAS1R1	TAS1R1	5	60397116	60405696	1		LOC489633	taste receptor type 1 member 1	taste 1 receptor member 1 [Source:HGNC Symbol;Acc:HGNC:14448]	PCAdmix_WOLF
	ENSCAFG00000019615	ZBTB48	ZBTB48	5	60406778	60413474	1		ZBTB48	zinc finger and BTB domain containing 48	zinc finger and BTB domain containing 48 [Source:HGNC Symbol;Acc:HGNC:4930]	PCAdmix_WOLF
	ENSCAFG00000019619	KLHL21	KLHL21	5	60418382	60427233	-1		KLHL21	kelch-like family member 21	kelch like family member 21 [Source:HGNC Symbol;Acc:HGNC:29041]	PCAdmix_WOLF
	ENSCAFG00000028782			5	60432493	60442053	1					PCAdmix_WOLF
	ENSCAFG00000019625	THAP3	THAP3	5	60442836	60449126	1		THAP3	THAP domain containing, apoptosis associated protein 3	THAP domain containing 3 [Source:HGNC Symbol;Acc:HGNC:20855]	PCAdmix_WOLF
	ENSCAFG00000019632	DNAJC11	DNAJC11	5	60451917	60525925	-1		DNAJC11	DnaJ (Hsp40) homolog, subfamily C, member 11	DnaJ heat shock protein family (Hsp40) member C11 [Source:HGNC Symbol;Acc:HGNC:25570]	PCAdmix_WOLF
	ENSCAFG00000019650	CAMTA1	CAMTA1	5	60864789	61429414	1		CAMTA1	calmodulin binding transcription activator 1	calmodulin binding transcription activator 1 [Source:HGNC Symbol;Acc:HGNC:18806]	PCAdmix_WOLF
	ENSCAFG00000031447	VAMP3	VAMP3	5	61430576	61443276	1		VAMP3	vesicle-associated membrane protein 3	vesicle associated membrane protein 3 [Source:HGNC Symbol;Acc:HGNC:12644]	PCAdmix_WOLF
	ENSCAFG00000019657	SCAMPER	SCAMPER	5	61432643	61432975	-1		SCAMPER	sphingolipid Ca2+ release mediating protein of endoplasmic reticulum	Putative protein SCAMPER [Source:UniProtKB/Swiss-Prot;Acc:Q9GLJ9]	PCAdmix_WOLF
	ENSCAFG00000019666	PER3	PER3	5	61446205	61502784	1		PER3	period circadian clock 3	period circadian clock 3 [Source:HGNC Symbol;Acc:HGNC:8847]	PCAdmix_WOLF
	ENSCAFG00000019673	TNFRSF9	TNFRSF9	5	61551405	61560583	-1		TNFRSF9	tumor necrosis factor receptor superfamily, member 9	tumor necrosis factor receptor superfamily member 9 [Source:HGNC Symbol;Acc:HGNC:11924]	PCAdmix_WOLF
	ENSCAFG00000019674	PARK7	PARK7	5	61577437	61592382	1		PARK7	parkinson protein 7	Parkinsonism associated deglycase [Source:HGNC Symbol;Acc:HGNC:16369]	PCAdmix_WOLF
	ENSCAFG00000019676	ERRFI1	ERRFI1	5	61623511	61625977	-1		ERRFI1	ERBB receptor feedback inhibitor 1	ERBB receptor feedback inhibitor 1 [Source:HGNC Symbol;Acc:HGNC:18185]	PCAdmix_WOLF
	ENSCAFG00000019681	SLC45A1	SLC45A1	5	61846419	61861256	1		SLC45A1	solute carrier family 45, member 1	solute carrier family 45 member 1 [Source:HGNC Symbol;Acc:HGNC:17939]	PCAdmix_WOLF
	ENSCAFG00000019688	RERE	RERE	5	61870945	62249053	-1		RERE	arginine-glutamic acid dipeptide (RE) repeats	arginine-glutamic acid dipeptide repeats [Source:HGNC Symbol;Acc:HGNC:9965]	PCAdmix_WOLF
	ENSCAFG00000019690			5	62169115	62169489	1					PCAdmix_WOLF
	ENSCAFG00000019697	ENO1	ENO1	5	62301164	62312161	-1				enolase 1 [Source:HGNC Symbol;Acc:HGNC:3350]	PCAdmix_WOLF
	ENSCAFG00000019708	CA6	CA6	5	62358521	62379901	1		CA6	carbonic anhydrase VI	carbonic anhydrase 6 [Source:HGNC Symbol;Acc:HGNC:1380]	PCAdmix_WOLF
	ENSCAFG00000019714	SLC2A5	SLC2A5	5	62412904	62436876	-1		LOC489640	solute carrier family 2, facilitated glucose transporter member 5	solute carrier family 2 member 5 [Source:HGNC Symbol;Acc:HGNC:11010]	PCAdmix_WOLF
	ENSCAFG00000019726	GPR157	GPR157	5	62455882	62475014	-1		GPR157	G protein-coupled receptor 157	G protein-coupled receptor 157 [Source:HGNC Symbol;Acc:HGNC:23687]	PCAdmix_WOLF
	ENSCAFG00000019727	H6PD	H6PD	5	62548964	62577402	1		H6PD	hexose-6-phosphate dehydrogenase (glucose 1-dehydrogenase)	hexose-6-phosphate dehydrogenase/glucose 1-dehydrogenase [Source:HGNC Symbol;Acc:HGNC:4795]	PCAdmix_WOLF
	ENSCAFG00000019732	SPSB1	SPSB1	5	62600531	62669625	1		SPSB1	splA/ryanodine receptor domain and SOCS box containing 1	splA/ryanodine receptor domain and SOCS box containing 1 [Source:HGNC Symbol;Acc:HGNC:30628]	PCAdmix_WOLF
	ENSCAFG00000019730	SLC25A33	SLC25A33	5	62790088	62826880	1		SLC25A33	solute carrier family 25 (pyrimidine nucleotide carrier), member 33	solute carrier family 25 member 33 [Source:HGNC Symbol;Acc:HGNC:29681]	PCAdmix_WOLF
	ENSCAFG00000019733	TMEM201	TMEM201	5	62834704	62851418	1		TMEM201	transmembrane protein 201	transmembrane protein 201 [Source:HGNC Symbol;Acc:HGNC:33719]	PCAdmix_WOLF
	ENSCAFG00000019735	PIK3CD	PIK3CD	5	62884514	62935487	1		PIK3CD	phosphatidylinositol-4,5-bisphosphate 3-kinase, catalytic subunit delta	phosphatidylinositol-4,5-bisphosphate 3-kinase catalytic subunit delta [Source:HGNC Symbol;Acc:HGNC:8977]	PCAdmix_WOLF
	ENSCAFG00000019740	CLSTN1	CLSTN1	5	62935907	63020092	-1		LOC479600	beta-catenin-interacting protein 1	calsyntenin 1 [Source:HGNC Symbol;Acc:HGNC:17447]	PCAdmix_WOLF
	ENSCAFG00000019744	CTNNBIP1	CTNNBIP1	5	63043496	63064587	-1		LOC479600	beta-catenin-interacting protein 1	catenin beta interacting protein 1 [Source:HGNC Symbol;Acc:HGNC:16913]	PCAdmix_WOLF
	ENSCAFG00000030456	LZIC	LZIC	5	63110479	63121684	-1		LZIC	leucine zipper and CTNNBIP1 domain containing	leucine zipper and CTNNBIP1 domain containing [Source:HGNC Symbol;Acc:HGNC:17497]	PCAdmix_WOLF
	ENSCAFG00000032251	NMNAT1	NMNAT1	5	63123430	63156597	1		NMNAT1	nicotinamide nucleotide adenylyltransferase 1	nicotinamide nucleotide adenylyltransferase 1 [Source:HGNC Symbol;Acc:HGNC:17877]	PCAdmix_WOLF
	ENSCAFG00000019753	RBP7	RBP7	5	63165361	63180637	1				retinol binding protein 7 [Source:HGNC Symbol;Acc:HGNC:30316]	PCAdmix_WOLF
	ENSCAFG00000019797	UBE4B	UBE4B	5	63215009	63339366	1		UBE4B	ubiquitination factor E4B	ubiquitination factor E4B [Source:HGNC Symbol;Acc:HGNC:12500]	PCAdmix_WOLF
	ENSCAFG00000019785	KIF1B	KIF1B	5	63366568	63516385	1		KIF1B	kinesin family member 1B	kinesin family member 1B [Source:HGNC Symbol;Acc:HGNC:16636]	PCAdmix_WOLF
	ENSCAFG00000024062			5	63571223	63584018	1					PCAdmix_WOLF
	ENSCAFG00000019801			5	63588208	63588815	1					PCAdmix_WOLF
	ENSCAFG00000019802		GAS8	5	63589299	63608947	-1		GAS8	growth arrest-specific 8		PCAdmix_WOLF
	ENSCAFG00000019803			5	63619157	63620667	1					PCAdmix_WOLF
	ENSCAFG00000019806	DEF8	DEF8	5	63658296	63672099	-1		DEF8	differentially expressed in FDCP 8 homolog (mouse)	differentially expressed in FDCP 8 homolog (mouse) [Source:HGNC Symbol;Acc:HGNC:25969]	PCAdmix_WOLF
	ENSCAFG00000019807		TUBB3	5	63682083	63690798	-1		TUBB3	tubulin, beta 3 class III		PCAdmix_WOLF
	ENSCAFG00000019808	TCF25	TCF25	5	63699996	63729665	-1		TCF25	transcription factor 25 (basic helix-loop-helix)	transcription factor 25 [Source:HGNC Symbol;Acc:HGNC:29181]	PCAdmix_WOLF
	ENSCAFG00000019813	FANCA	FANCA	5	63778212	63838789	1		FANCA	Fanconi anemia, complementation group A	Fanconi anemia complementation group A [Source:HGNC Symbol;Acc:HGNC:3582]	PCAdmix_WOLF
	ENSCAFG00000028840			5	63784116	63829330	-1					PCAdmix_WOLF
	ENSCAFG00000019816	ZNF276	ZNF276	5	63839186	63857194	-1		ZNF276	zinc finger protein 276	zinc finger protein 276 [Source:HGNC Symbol;Acc:HGNC:23330]	PCAdmix_WOLF
	ENSCAFG00000019818	VPS9D1	VPS9D1	5	63857893	63869417	1		VPS9D1	VPS9 domain containing 1	VPS9 domain containing 1 [Source:HGNC Symbol;Acc:HGNC:13526]	PCAdmix_WOLF
	ENSCAFG00000019819	SPATA2L	SPATA2L	5	63874341	63877395	1		SPATA2L	spermatogenesis associated 2-like	spermatogenesis associated 2 like [Source:HGNC Symbol;Acc:HGNC:28393]	PCAdmix_WOLF
	ENSCAFG00000019820	CDK10	CDK10	5	63879061	63886027	-1		CDK10	cyclin-dependent kinase 10	cyclin dependent kinase 10 [Source:HGNC Symbol;Acc:HGNC:1770]	PCAdmix_WOLF
	ENSCAFG00000019821	SPATA33	SPATA33	5	63887596	63897373	-1				spermatogenesis associated 33 [Source:HGNC Symbol;Acc:HGNC:26463]	PCAdmix_WOLF
	ENSCAFG00000019822	CHMP1A	CHMP1A	5	63897672	63905050	1		CHMP1A	charged multivesicular body protein 1A	charged multivesicular body protein 1A [Source:HGNC Symbol;Acc:HGNC:8740]	PCAdmix_WOLF
	ENSCAFG00000019824	DPEP1	DPEP1	5	63909245	63915590	-1		DPEP1	dipeptidase 1 (renal)	dipeptidase 1 (renal) [Source:HGNC Symbol;Acc:HGNC:3002]	PCAdmix_WOLF
	ENSCAFG00000019834	CPNE7	CPNE7	5	63950694	63978601	-1		CPNE7	copine VII	copine 7 [Source:HGNC Symbol;Acc:HGNC:2320]	PCAdmix_WOLF
	ENSCAFG00000019840		RPL13	5	63976208	63980363	-1		RPL13	ribosomal protein L13		PCAdmix_WOLF
	ENSCAFG00000019842	SPG7	SPG7	5	63985845	64024124	-1		SPG7	spastic paraplegia 7 (pure and complicated autosomal recessive)	SPG7, paraplegin matrix AAA peptidase subunit [Source:HGNC Symbol;Acc:HGNC:11237]	PCAdmix_WOLF
	ENSCAFG00000019843	ANKRD11	ANKRD11	5	64113393	64230653	1		ANKRD11	ankyrin repeat domain 11	ankyrin repeat domain 11 [Source:HGNC Symbol;Acc:HGNC:21316]	PCAdmix_WOLF
	ENSCAFG00000019845			5	64253957	64258186	1					PCAdmix_WOLF
	ENSCAFG00000019846	CDH15	CDH15	5	64257310	64277178	-1		CDH15	cadherin 15, type 1, M-cadherin (myotubule)	cadherin 15 [Source:HGNC Symbol;Acc:HGNC:1754]	PCAdmix_WOLF
	ENSCAFG00000019849	ACSF3	ACSF3	5	64291545	64337112	-1		ACSF3	acyl-CoA synthetase family member 3	acyl-CoA synthetase family member 3 [Source:HGNC Symbol;Acc:HGNC:27288]	PCAdmix_WOLF
	ENSCAFG00000019852	CBFA2T3	CBFA2T3	5	64497216	64521826	1		CBFA2T3	core-binding factor, runt domain, alpha subunit 2; translocated to, 3	CBFA2/RUNX1 translocation partner 3 [Source:HGNC Symbol;Acc:HGNC:1537]	PCAdmix_WOLF
	ENSCAFG00000019856	TRAPPC2L	TRAPPC2L	5	64530910	64534024	-1		TRAPPC2L	trafficking protein particle complex 2-like	trafficking protein particle complex 2-like [Source:HGNC Symbol;Acc:HGNC:30887]	PCAdmix_WOLF
	ENSCAFG00000019861	GALNS	GALNS	5	64534188	64562169	1		GALNS	galactosamine (N-acetyl)-6-sulfatase	N-acetylgalactosamine-6-sulfatase precursor [Source:RefSeq peptide;Acc:NP_001041585]	PCAdmix_WOLF
	ENSCAFG00000019873	CTU2	CTU2	5	64535316	64647698	-1		CTU2	cytosolic thiouridylase subunit 2 homolog (S. pombe)	cytosolic thiouridylase subunit 2 [Source:HGNC Symbol;Acc:HGNC:28005]	PCAdmix_WOLF
	ENSCAFG00000019865	APRT	APRT	5	64563221	64565322	1		APRT	adenine phosphoribosyltransferase	adenine phosphoribosyltransferase [Source:HGNC Symbol;Acc:HGNC:626]	PCAdmix_WOLF
	ENSCAFG00000019866	CDT1	CDT1	5	64566215	64570307	-1				chromatin licensing and DNA replication factor 1 [Source:HGNC Symbol;Acc:HGNC:24576]	PCAdmix_WOLF
	ENSCAFG00000019870	PIEZO1	PIEZO1	5	64584139	64640161	1		PIEZO1	piezo-type mechanosensitive ion channel component 1	piezo type mechanosensitive ion channel component 1 [Source:HGNC Symbol;Acc:HGNC:28993]	PCAdmix_WOLF
	ENSCAFG00000029455			5	64633401	64899281	-1					PCAdmix_WOLF
	ENSCAFG00000019875	RNF166	RNF166	5	64647472	64656166	1		RNF166	ring finger protein 166	ring finger protein 166 [Source:HGNC Symbol;Acc:HGNC:28856]	PCAdmix_WOLF
	ENSCAFG00000029458	SNAI3	SNAI3	5	64661108	64671160	1		SNAI3	snail family zinc finger 3	snail family transcriptional repressor 3 [Source:HGNC Symbol;Acc:HGNC:18411]	PCAdmix_WOLF
	ENSCAFG00000019878	MVD	MVD	5	64682715	64691632	1		MVD	mevalonate (diphospho) decarboxylase	mevalonate diphosphate decarboxylase [Source:HGNC Symbol;Acc:HGNC:7529]	PCAdmix_WOLF
	ENSCAFG00000019881	cyba	cyba	5	64692712	64701056	1		CYBA	cytochrome b-245, alpha polypeptide	cytochrome b-245 alpha chain [Source:HGNC Symbol;Acc:HGNC:2577]	PCAdmix_WOLF
	ENSCAFG00000019883	IL17C	IL17C	5	64702730	64703685	-1		IL17C	interleukin 17C	interleukin 17C [Source:HGNC Symbol;Acc:HGNC:5983]	PCAdmix_WOLF
	ENSCAFG00000019884	ZC3H18	ZC3H18	5	64708212	64774564	-1		ZC3H18	zinc finger CCCH-type containing 18	zinc finger CCCH-type containing 18 [Source:HGNC Symbol;Acc:HGNC:25091]	PCAdmix_WOLF
	ENSCAFG00000032382			5	64813632	64853343	-1					PCAdmix_WOLF
	ENSCAFG00000019894	BANP	BANP	5	65151760	65257046	-1		BANP	BTG3 associated nuclear protein	BTG3 associated nuclear protein [Source:HGNC Symbol;Acc:HGNC:13450]	PCAdmix_WOLF
	ENSCAFG00000019899	CA5A	CA5A	5	65269774	65297629	1		CA5A	carbonic anhydrase VA, mitochondrial	carbonic anhydrase 5A [Source:HGNC Symbol;Acc:HGNC:1377]	PCAdmix_WOLF
	ENSCAFG00000019901	SLC7A5	SLC7A5	5	65312985	65346118	1		SLC7A5	solute carrier family 7 (amino acid transporter light chain, L system), member 5	large neutral amino acids transporter small subunit 1 [Source:RefSeq peptide;Acc:NP_001271411]	PCAdmix_WOLF
	ENSCAFG00000019904	KLHDC4	KLHDC4	5	65386519	65443427	1				kelch domain containing 4 [Source:HGNC Symbol;Acc:HGNC:25272]	PCAdmix_WOLF
	ENSCAFG00000019906	JPH3	JPH3	5	65451179	65530336	-1		JPH3	junctophilin 3	junctophilin 3 [Source:HGNC Symbol;Acc:HGNC:14203]	PCAdmix_WOLF
	ENSCAFG00000019907	ZCCHC14	ZCCHC14	5	65610958	65664202	1		ZCCHC14	zinc finger, CCHC domain containing 14	zinc finger CCHC-type containing 14 [Source:HGNC Symbol;Acc:HGNC:24134]	PCAdmix_WOLF
	ENSCAFG00000019909	MAP1LC3B	MAP1LC3B	5	65671164	65683318	-1		MAP1LC3B	microtubule-associated protein 1 light chain 3 beta	microtubule associated protein 1 light chain 3 beta [Source:HGNC Symbol;Acc:HGNC:13352]	PCAdmix_WOLF
	ENSCAFG00000019910		FBXO31	5	65703590	65730828	1		FBXO31	F-box protein 31		PCAdmix_WOLF
	ENSCAFG00000019914			5	65744100	65757386	1					PCAdmix_WOLF
	ENSCAFG00000019915	FOXL1	FOXL1	5	66283528	66284598	-1		FOXL1	forkhead box L1	forkhead box L1 [Source:HGNC Symbol;Acc:HGNC:3817]	PCAdmix_WOLF
	ENSCAFG00000019916	FOXC2	FOXC2	5	66294176	66295693	-1		FOXC2	forkhead box C2	forkhead box C2 [Source:HGNC Symbol;Acc:HGNC:3801]	PCAdmix_WOLF
	ENSCAFG00000019917	MTHFSD	MTHFSD	5	66311193	66331736	1		MTHFSD	methenyltetrahydrofolate synthetase domain containing	methenyltetrahydrofolate synthetase domain containing [Source:HGNC Symbol;Acc:HGNC:25778]	PCAdmix_WOLF
	ENSCAFG00000019918	FOXF1	FOXF1	5	66341523	66347925	-1		FOXF1	forkhead box F1	forkhead box F1 [Source:HGNC Symbol;Acc:HGNC:3809]	PCAdmix_WOLF
	ENSCAFG00000019919	IRF8	IRF8	5	66788723	66808896	-1		IRF8	interferon regulatory factor 8	interferon regulatory factor 8 [Source:HGNC Symbol;Acc:HGNC:5358]	PCAdmix_WOLF
	ENSCAFG00000019921	COX4I1	COX4I1	5	66883604	66890296	-1		COX4I1	cytochrome c oxidase subunit IV isoform 1	cytochrome c oxidase subunit 4I1 [Source:HGNC Symbol;Acc:HGNC:2265]	PCAdmix_WOLF
	ENSCAFG00000019922	EMC8	EMC8	5	66891742	66910318	1		EMC8	ER membrane protein complex subunit 8	ER membrane protein complex subunit 8 [Source:HGNC Symbol;Acc:HGNC:7864]	PCAdmix_WOLF
	ENSCAFG00000019923	C16orf74	C16orf74	5	66947119	66968823	1		C5H16orf74	chromosome 5 open reading frame, human C16orf74	chromosome 16 open reading frame 74 [Source:HGNC Symbol;Acc:HGNC:23362]	PCAdmix_WOLF
	ENSCAFG00000019924	GINS2	GINS2	5	66982041	66995886	1		GINS2	GINS complex subunit 2 (Psf2 homolog)	GINS complex subunit 2 [Source:HGNC Symbol;Acc:HGNC:24575]	PCAdmix_WOLF
	ENSCAFG00000019928	GSE1	GSE1	5	67001669	67106405	-1		GSE1	Gse1 coiled-coil protein	Gse1 coiled-coil protein [Source:HGNC Symbol;Acc:HGNC:28979]	PCAdmix_WOLF
	ENSCAFG00000019934	FAM92B	FAM92B	5	67465640	67479218	1		FAM92B	family with sequence similarity 92, member B	family with sequence similarity 92 member B [Source:HGNC Symbol;Acc:HGNC:24781]	PCAdmix_WOLF
	ENSCAFG00000019937	KIAA0513	KIAA0513	5	67486448	67534474	-1		KIAA0513	KIAA0513 ortholog	KIAA0513 [Source:HGNC Symbol;Acc:HGNC:29058]	PCAdmix_WOLF
	ENSCAFG00000019939	ZDHHC7	ZDHHC7	5	67566563	67578412	1		ZDHHC7	zinc finger, DHHC-type containing 7	zinc finger DHHC-type containing 7 [Source:HGNC Symbol;Acc:HGNC:18459]	PCAdmix_WOLF
	ENSCAFG00000019943	CRISPLD2	CRISPLD2	5	67643124	67707753	-1		CRISPLD2	cysteine-rich secretory protein LCCL domain containing 2	cysteine rich secretory protein LCCL domain containing 2 [Source:HGNC Symbol;Acc:HGNC:25248]	PCAdmix_WOLF
	ENSCAFG00000019946	USP10	USP10	5	67735780	67774711	-1		USP10	ubiquitin specific peptidase 10	ubiquitin specific peptidase 10 [Source:HGNC Symbol;Acc:HGNC:12608]	PCAdmix_WOLF
	ENSCAFG00000019947	KLHL36	KLHL36	5	67828212	67845977	-1		KLHL36	kelch-like family member 36	kelch like family member 36 [Source:HGNC Symbol;Acc:HGNC:17844]	PCAdmix_WOLF
	ENSCAFG00000032529	COTL1	COTL1	5	67872065	67909045	1		COTL1	coactosin-like F-actin binding protein 1	coactosin like F-actin binding protein 1 [Source:HGNC Symbol;Acc:HGNC:18304]	PCAdmix_WOLF
	ENSCAFG00000019949	TLDC1	TLDC1	5	67965072	67975264	1		TLDC1	TBC/LysM-associated domain containing 1	TBC/LysM-associated domain containing 1 [Source:HGNC Symbol;Acc:HGNC:29325]	PCAdmix_WOLF
	ENSCAFG00000019952	ATP2C2	ATP2C2	5	67986325	68027351	-1		ATP2C2	ATPase, Ca++ transporting, type 2C, member 2	ATPase secretory pathway Ca2+ transporting 2 [Source:HGNC Symbol;Acc:HGNC:29103]	PCAdmix_WOLF
	ENSCAFG00000019956	WFDC1	WFDC1	5	68067840	68096067	-1		WFDC1	WAP four-disulfide core domain 1	WAP four-disulfide core domain 1 [Source:HGNC Symbol;Acc:HGNC:15466]	PCAdmix_WOLF
	ENSCAFG00000019957	KCNG4	KCNG4	5	68135779	68150522	1		KCNG4	potassium channel, voltage gated modifier subfamily G, member 4	potassium voltage-gated channel modifier subfamily G member 4 [Source:HGNC Symbol;Acc:HGNC:19697]	PCAdmix_WOLF
	ENSCAFG00000019959	ADAD2	ADAD2	5	68163104	68170010	-1		ADAD2	adenosine deaminase domain containing 2	adenosine deaminase domain containing 2 [Source:HGNC Symbol;Acc:HGNC:30714]	PCAdmix_WOLF
	ENSCAFG00000019962	TAF1C	TAF1C	5	68179975	68183785	1				TATA-box binding protein associated factor, RNA polymerase I subunit C [Source:HGNC Symbol;Acc:HGNC:11534]	PCAdmix_WOLF
	ENSCAFG00000019964	DNAAF1	DNAAF1	5	68184243	68205951	-1		DNAAF1	dynein, axonemal, assembly factor 1	dynein (axonemal) assembly factor 1 [Source:HGNC Symbol;Acc:HGNC:30539]	PCAdmix_WOLF
	ENSCAFG00000019965	HSDL1	HSDL1	5	68212990	68227281	1		HSDL1	hydroxysteroid dehydrogenase like 1	hydroxysteroid dehydrogenase like 1 [Source:HGNC Symbol;Acc:HGNC:16475]	PCAdmix_WOLF
	ENSCAFG00000019967	MBTPS1	MBTPS1	5	68241444	68282025	1		MBTPS1	membrane-bound transcription factor peptidase, site 1	membrane bound transcription factor peptidase, site 1 [Source:HGNC Symbol;Acc:HGNC:15456]	PCAdmix_WOLF
	ENSCAFG00000019968	SLC38A8	SLC38A8	5	68290408	68308278	1		SLC38A8	solute carrier family 38, member 8	solute carrier family 38 member 8 [Source:HGNC Symbol;Acc:HGNC:32434]	PCAdmix_WOLF
	ENSCAFG00000019970	OSGIN1	OSGIN1	5	68314175	68351625	-1		NECAB2	N-terminal EF-hand calcium binding protein 2	oxidative stress induced growth inhibitor 1 [Source:HGNC Symbol;Acc:HGNC:30093]	PCAdmix_WOLF
	ENSCAFG00000019971		MLYCD	5	68385618	68399965	-1		MLYCD	malonyl-CoA decarboxylase		PCAdmix_WOLF
	ENSCAFG00000019973	HSBP1	HSBP1	5	68477917	68479086	-1		HSBP1	heat shock factor binding protein 1	heat shock factor binding protein 1 [Source:HGNC Symbol;Acc:HGNC:5203]	PCAdmix_WOLF
	ENSCAFG00000019974	CDH13	CDH13	5	68492245	69273196	-1				cadherin 13 [Source:HGNC Symbol;Acc:HGNC:1753]	PCAdmix_WOLF
	ENSCAFG00000024504	MPHOSPH6	MPHOSPH6	5	69887187	69910376	1		MPHOSPH6	M-phase phosphoprotein 6	M-phase phosphoprotein 6 [Source:HGNC Symbol;Acc:HGNC:7214]	PCAdmix_WOLF
	ENSCAFG00000019997	CMIP	CMIP	5	70250992	70337722	-1				c-Maf inducing protein [Source:HGNC Symbol;Acc:HGNC:24319]	PCAdmix_WOLF
	ENSCAFG00000019999	GAN	GAN	5	70531068	70579353	-1		GAN	gigaxonin	gigaxonin [Source:HGNC Symbol;Acc:HGNC:4137]	PCAdmix_WOLF
	ENSCAFG00000020006	BCO1	BCO1	5	70595401	70637178	-1		BCO1	beta-carotene oxygenase 1	beta-carotene oxygenase 1 [Source:HGNC Symbol;Acc:HGNC:13815]	PCAdmix_WOLF
	ENSCAFG00000020012		PKD1L2	5	70653179	70740929	1		PKD1L2	polycystic kidney disease 1-like 2		PCAdmix_WOLF
	ENSCAFG00000020014	GCSH	GCSH	5	70745657	70756797	1		GCSH	glycine cleavage system protein H (aminomethyl carrier)	glycine cleavage system protein H [Source:HGNC Symbol;Acc:HGNC:4208]	PCAdmix_WOLF
	ENSCAFG00000028860			5	70761693	70765909	1					PCAdmix_WOLF
	ENSCAFG00000020015	C16orf46	C16orf46	5	70765736	70774052	1		C5H16orf46	chromosome 5 open reading frame, human C16orf46	chromosome 16 open reading frame 46 [Source:HGNC Symbol;Acc:HGNC:26525]	PCAdmix_WOLF
	ENSCAFG00000020016	ATMIN	ATMIN	5	70782853	70795870	-1		ATMIN	ATM interactor	ATM interactor [Source:HGNC Symbol;Acc:HGNC:29034]	PCAdmix_WOLF
	ENSCAFG00000020017	CENPN	CENPN	5	70798330	70817081	-1		CENPN	centromere protein N	centromere protein N [Source:HGNC Symbol;Acc:HGNC:30873]	PCAdmix_WOLF
	ENSCAFG00000020020	CDYL2	CDYL2	5	71080748	71127112	1				chromodomain protein, Y-like 2 [Source:HGNC Symbol;Acc:HGNC:23030]	PCAdmix_WOLF
	ENSCAFG00000020024	DYNLRB2	DYNLRB2	5	71169670	71176593	-1		DYNLRB2	dynein, light chain, roadblock-type 2	dynein light chain roadblock-type 2 [Source:HGNC Symbol;Acc:HGNC:15467]	PCAdmix_WOLF
	ENSCAFG00000002189	CEP135	CEP135	13	48206007	48281059	1		CEP135	centrosomal protein 135kDa	centrosomal protein 135 [Source:HGNC Symbol;Acc:HGNC:29086]	PCAdmix_WOLF
	ENSCAFG00000002202	KIAA1211	KIAA1211	13	48544668	48570962	1		KIAA1211	KIAA1211 ortholog	KIAA1211 [Source:HGNC Symbol;Acc:HGNC:29219]	PCAdmix_WOLF
	ENSCAFG00000030763	FAM210B	FAM210B	24	41574319	41583623	1		FAM210B	family with sequence similarity 210, member B	family with sequence similarity 210 member B [Source:HGNC Symbol;Acc:HGNC:16102]	PCAdmix_WOLF
	ENSCAFG00000029331	AURKA	AURKA	24	41585941	41600617	-1		AURKA	aurora kinase A	aurora kinase A [Source:HGNC Symbol;Acc:HGNC:11393]	PCAdmix_WOLF
	ENSCAFG00000011914	CSTF1	CSTF1	24	41607740	41617426	1		CSTF1	cleavage stimulation factor, 3' pre-RNA, subunit 1, 50kDa	cleavage stimulation factor subunit 1 [Source:HGNC Symbol;Acc:HGNC:2483]	PCAdmix_WOLF
	ENSCAFG00000011920	CASS4	CASS4	24	41642667	41661995	1				Cas scaffolding protein family member 4 [Source:HGNC Symbol;Acc:HGNC:15878]	PCAdmix_WOLF
	ENSCAFG00000011946	RTFDC1	RTFDC1	24	41664937	41708224	1		RTFDC1	replication termination factor 2 domain containing 1	replication termination factor 2 domain containing 1 [Source:HGNC Symbol;Acc:HGNC:15890]	PCAdmix_WOLF
	ENSCAFG00000011964	GCNT7	GCNT7	24	41684753	41696194	-1		GCNT7	glucosaminyl (N-acetyl) transferase family member 7	glucosaminyl (N-acetyl) transferase family member 7 [Source:HGNC Symbol;Acc:HGNC:16099]	PCAdmix_WOLF
	ENSCAFG00000011968			24	41710727	41712218	1					PCAdmix_WOLF
	ENSCAFG00000011996	TFAP2C	TFAP2C	24	41787822	41797500	1				transcription factor AP-2 gamma [Source:HGNC Symbol;Acc:HGNC:11744]	PCAdmix_WOLF
	ENSCAFG00000007190	CLVS1	CLVS1	29	11638561	11811285	1		CLVS1	clavesin 1	clavesin 1 [Source:HGNC Symbol;Acc:HGNC:23139]	PCAdmix_WOLF
	ENSCAFG00000007197	ASPH	ASPH	29	11815015	12022539	-1		ASPH	aspartate beta-hydroxylase		PCAdmix_WOLF
	ENSCAFG00000007203	GGH	GGH	29	13141092	13164963	-1		GGH	gamma-glutamyl hydrolase (conjugase, folylpolygammaglutamyl hydrolase)	gamma-glutamyl hydrolase [Source:HGNC Symbol;Acc:HGNC:4248]	PCAdmix_WOLF
	ENSCAFG00000028514	TTPA	TTPA	29	13179614	13201883	-1				alpha tocopherol transfer protein [Source:HGNC Symbol;Acc:HGNC:12404]	PCAdmix_WOLF
	ENSCAFG00000007215	YTHDF3	YTHDF3	29	13240225	13276948	1		YTHDF3	YTH N(6)-methyladenosine RNA binding protein 3	YTH N6-methyladenosine RNA binding protein 3 [Source:HGNC Symbol;Acc:HGNC:26465]	PCAdmix_WOLF
	ENSCAFG00000017363			29	13997008	13997586	1					PCAdmix_WOLF
	ENSCAFG00000008570			29	31420777	31497466	1					PCAdmix_WOLF
	ENSCAFG00000008581	SLC7A13	SLC7A13	29	31650478	31658854	1				solute carrier family 7 member 13 [Source:HGNC Symbol;Acc:HGNC:23092]	PCAdmix_WOLF
	ENSCAFG00000008598	LRRCC1	LRRCC1	29	31678314	31719902	1		LRRCC1	leucine rich repeat and coiled-coil centrosomal protein 1	leucine rich repeat and coiled-coil centrosomal protein 1 [Source:HGNC Symbol;Acc:HGNC:29373]	PCAdmix_WOLF
	ENSCAFG00000008628	E2F5	E2F5	29	31745265	31757780	1		E2F5	E2F transcription factor 5, p130-binding	E2F transcription factor 5 [Source:HGNC Symbol;Acc:HGNC:3119]	PCAdmix_WOLF
	ENSCAFG00000030792	CA13	CA13	29	31784610	31823728	1		CA13	carbonic anhydrase XIII	carbonic anhydrase 13 [Source:HGNC Symbol;Acc:HGNC:14914]	PCAdmix_WOLF
	ENSCAFG00000008702	CA1	CA1	29	31858830	31868135	-1		CA1	carbonic anhydrase I	carbonic anhydrase 1 [Source:HGNC Symbol;Acc:HGNC:1368]	PCAdmix_WOLF
	ENSCAFG00000025237	CA3	CA3	29	31935192	31945585	1		CA3	carbonic anhydrase III	carbonic anhydrase 3 [Source:HGNC Symbol;Acc:HGNC:1374]	PCAdmix_WOLF

## Sheet: Table S1b
	Table S1b Enrichment in gene ontology (GO) categories of the wolf excess genes surrounding the outlier wolf-like SNPs identified from PCADMIX.
	Term ID	Term type	Term group	Term name	Term depth	p-value	Q&T list
	GO:1903184	BP	33	L-dopa metabolic process	1	0.0407	PARK7
	GO:1903185	BP	33	L-dopa biosynthetic process	2	0.0407	PARK7
	GO:1903195	BP	33	regulation of L-dopa biosynthetic process	1	0.0407	PARK7
	GO:1903197	BP	33	positive regulation of L-dopa biosynthetic process	1	0.0407	PARK7
	GO:2001183	BP	19	negative regulation of interleukin-12 secretion	1	0.0407	TNFRSF9
	GO:1903189	BP	32	glyoxal metabolic process	1	0.0407	PARK7
	GO:1903190	BP	32	glyoxal catabolic process	1	0.0407	PARK7
	GO:1900533	BP	34	palmitic acid metabolic process	1	0.0407	ACOT7
	GO:1900535	BP	34	palmitic acid biosynthetic process	2	0.0407	ACOT7
	GO:1903122	BP	31	negative regulation of TRAIL-activated apoptotic signaling pathway	1	0.0407	PARK7
	GO:1903176	BP	12	regulation of tyrosine 3-monooxygenase activity	1	0.0407	PARK7
	GO:1903178	BP	12	positive regulation of tyrosine 3-monooxygenase activity	2	0.0407	PARK7
	GO:1903116	BP	27	positive regulation of actin filament-based movement	1	0.0407	RNF207
	GO:1905031	BP	27	regulation of membrane repolarization during cardiac muscle cell action potential	1	0.0407	RNF207
	GO:1905033	BP	27	positive regulation of membrane repolarization during cardiac muscle cell action potential	2	0.0407	RNF207
	GO:1905024	BP	27	regulation of membrane repolarization during ventricular cardiac muscle cell action potential	2	0.0407	RNF207
	GO:1903760	BP	27	regulation of voltage-gated potassium channel activity involved in ventricular cardiac muscle cell action potential repolarization	3	0.0407	RNF207
	GO:1903947	BP	27	positive regulation of ventricular cardiac muscle cell action potential	1	0.0407	RNF207
	GO:1905026	BP	27	positive regulation of membrane repolarization during ventricular cardiac muscle cell action potential	2	0.0407	RNF207
	GO:1903762	BP	27	positive regulation of voltage-gated potassium channel activity involved in ventricular cardiac muscle cell action potential repolarization	1	0.0407	RNF207
	GO:1903179	BP	49	regulation of dopamine biosynthetic process	1	0.0407	PARK7
	GO:1903181	BP	49	positive regulation of dopamine biosynthetic process	1	0.0407	PARK7
	GO:0050787	BP	83	detoxification of mercury ion	1	0.0407	PARK7
	GO:1903198	BP	26	regulation of L-dopa decarboxylase activity	1	0.0407	PARK7
	GO:1903200	BP	26	positive regulation of L-dopa decarboxylase activity	1	0.0407	PARK7
	GO:2001180	BP	37	negative regulation of interleukin-10 secretion	1	0.0407	TNFRSF9
	GO:0036115	BP	43	fatty-acyl-CoA catabolic process	1	0.0407	ACOT7
	GO:0036114	BP	43	medium-chain fatty-acyl-CoA catabolic process	2	0.0407	ACOT7
	GO:0036116	BP	43	long-chain fatty-acyl-CoA catabolic process	2	0.0407	ACOT7
	GO:0018323	BP	42	enzyme active site formation via L-cysteine sulfinic acid	1	0.0407	PARK7
	GO:1903167	BP	54	regulation of pyrroline-5-carboxylate reductase activity	1	0.0407	PARK7
	GO:1903168	BP	54	positive regulation of pyrroline-5-carboxylate reductase activity	2	0.0407	PARK7
	GO:0006730	BP	57	one-carbon metabolic process	1	0.00046	CA1,CA3,CA13
	GO:1901379	BP	79	regulation of potassium ion transmembrane transport	1	0.05	KCNAB2,RNF207
	GO:0046295	BP	84	glycolate biosynthetic process	1	0.0407	PARK7
	GO:0035853	BP	73	chromosome passenger complex localization to spindle midzone	1	0.0407	KLHL21
	GO:0036471	BP	35	cellular response to glyoxal	1	0.0407	PARK7
	GO:2000277	BP	69	positive regulation of oxidative phosphorylation uncoupler activity	1	0.0407	PARK7
	GO:2000825	BP	72	positive regulation of androgen receptor activity	1	0.0407	PARK7
	HP:0000725	hp	20	Psychotic episodes	1	0.0208	PARK7
	HP:0002101	hp	67	Abnormal lung lobation	1	0.0379	KCNAB2
	HP:0000160	hp	41	Narrow mouth	1	0.0182	KCNAB2,CAMTA1
	HP:0008802	hp	71	Hypoplasia of the femoral head	1	0.0208	NPHP4
	HP:0000851	hp	58	Congenital hypothyroidism	1	0.0379	KCNAB2
	HP:0003679	hp	5	Pace of progression	1	0.0399	ESPN,PLEKHG5,PARK7
	HP:0006897	hp	29	Cranial nerve VI palsy	1	0.00698	KCNAB2
	HP:0010316	hp	38	Ebstein's anomaly of the tricuspid valve	1	0.00872	KCNAB2
	HP:0001761	hp	86	Pes cavus	1	0.0483	KCNAB2,PLEKHG5
	HP:0045007	hp	22	Abnormality of the substantia nigra	1	0.0242	PARK7
	HP:0011960	hp	22	Substantia nigra gliosis	2	0.0242	PARK7
	HP:0003416	hp	2	Spinal canal stenosis	1	0.0497	KCNAB2
	HP:0012757	hp	13	Abnormal neuron morphology	1	0.00474	PLEKHG5,PARK7
	HP:0002450	hp	13	Abnormal motor neuron morphology	2	0.00474	PLEKHG5,PARK7
	HP:0002366	hp	13	Abnormal lower motor neuron morphology	3	0.00203	PLEKHG5,PARK7
	HP:0003697	hp	80	Scapuloperoneal amyotrophy	1	0.00349	PLEKHG5
	HP:0012817	hp	50	Noncompaction cardiomyopathy	1	0.0277	KCNAB2
	HP:0010722	hp	75	Asymmetry of the ears	1	0.0174	KCNAB2
	HP:0400005	hp	61	Short ear	1	0.00349	CAMTA1
	HP:0001385	hp	63	Hip dysplasia	1	0.0497	KCNAB2
	HP:0000547	hp	82	Tapetoretinal degeneration	1	0.0328	NPHP4
	HP:0000902	hp	64	Rib fusion	1	0.0328	KCNAB2
	HP:0009473	hp	77	Joint contracture of the hand	1	0.041	KCNAB2,PLEKHG5
	HP:0011228	hp	59	Horizontal eyebrow	1	0.0311	KCNAB2
	HP:0001655	hp	23	Patent foramen ovale	1	0.0413	KCNAB2
	HP:0009237	hp	76	Short 5th finger	1	0.0497	KCNAB2
	HP:0002548	hp	81	Parkinsonism with favorable response to dopaminergic medication	1	0.0413	PARK7
	HP:0410004	hp	44	Cleft secondary palate	1	0.0446	KCNAB2
	HP:0410005	hp	44	Cleft hard palate	2	0.0311	KCNAB2
	HP:0000176	hp	44	Submucous cleft hard palate	3	0.0311	KCNAB2
	HP:0002322	hp	17	Resting tremor	1	0.0413	PARK7
	HP:0002003	hp	36	Large forehead	1	0.0122	CAMTA1
	HP:0000092	hp	9	Tubular atrophy	1	0.0345	NPHP4
	HP:0010936	hp	53	Abnormality of the lower urinary tract	1	0.0354	NPHP4,KCNAB2,PARK7
	HP:0002188	hp	39	Delayed CNS myelination	1	0.026	KCNAB2
	HP:0011463	hp	25	Childhood onset	1	0.0353	ESPN,PLEKHG5
	HP:0100559	hp	11	Lower limb asymmetry	1	0.0345	KCNAB2
	HP:0001583	hp	51	Rotary nystagmus	1	0.0208	NPHP4
	HP:0030047	hp	7	Abnormality of lateral ventricle	1	0.0463	KCNAB2
	HP:0006956	hp	7	Dilation of lateral ventricles	2	0.0362	KCNAB2
	HP:0000103	hp	65	Polyuria	1	0.0463	NPHP4
	HP:0000643	hp	74	Blepharospasm	1	0.0396	PARK7
	HP:0000892	hp	47	Bifid ribs	1	0.0139	KCNAB2
	HP:0007269	hp	6	Spinal muscular atrophy	1	0.0413	PLEKHG5
	HP:0000009	hp	30	Functional abnormality of the bladder	1	0.05	NPHP4,PARK7
	HP:0030760	hp	78	Renal fibrosis	1	0.0345	NPHP4
	HP:0005576	hp	78	Tubulointerstitial fibrosis	2	0.0345	NPHP4
	HP:0000750	hp	87	Delayed speech and language development	1	0.033	KCNAB2,ESPN,CAMTA1
	HP:0040202	hp	4	Abnormal consumption behavior	1	0.00535	NPHP4,KCNAB2
	HP:0030082	hp	4	Abnormal drinking behavior	2	0.0396	NPHP4
	HP:0001959	hp	4	Polydipsia	3	0.0396	NPHP4
	HP:0007730	hp	21	Iris hypopigmentation	1	0.048	KCNAB2
	HP:0001107	hp	21	Ocular albinism	1	0.0429	KCNAB2
	HP:0001732	hp	70	Abnormality of the pancreas	1	0.0418	NPHP4,KCNAB2
	HP:0012090	hp	70	Abnormality of pancreas morphology	2	0.00445	NPHP4,KCNAB2
	HP:0001734	hp	70	Annular pancreas	3	0.0156	KCNAB2
	HP:0001288	hp	66	Gait disturbance	1	0.014	KCNAB2,PLEKHG5,CAMTA1,PARK7
	HP:0001407	hp	60	Hepatic cysts	1	0.0277	NPHP4
	HP:0000307	hp	62	Pointed chin	1	0.00633	KCNAB2,CAMTA1
	HP:0000107	hp	56	Renal cyst	1	0.0487	NPHP4,KCNAB2
	HP:0000108	hp	56	Renal corticomedullary cysts	1	0.0311	NPHP4
	HP:0010865	hp	24	Oppositional defiant disorder	1	0.0105	KCNAB2
	HP:0003387	hp	85	Decreased number of large peripheral myelinated nerve fibers	1	0.0225	PLEKHG5
	HP:0000391	hp	68	Thickened helices	1	0.0463	KCNAB2
	HP:0003551	hp	14	Difficulty climbing stairs	1	0.0345	PLEKHG5
	HP:0002616	hp	45	Aortic root dilatation	1	0.0208	KCNAB2

## Sheet: Table S1c
	Table S1c Dog excess genes surrounding the outlier dog-like SNPs identified from PCADMIX
	Ensembl Gene ID	Associated Gene Name	Associated Gene Name + Wiki	Chromosome Name	Gene Start (bp)	Gene End (bp)	Strand	Phenotype description	WikiGene Name	WikiGene Description	Description	Method
	ENSCAFG00000000265	OLIG3	OLIG3	1	29920190	29921008	-1		OLIG3	oligodendrocyte transcription factor 3	oligodendrocyte transcription factor 3 [Source:HGNC Symbol;Acc:HGNC:18003]	PCAdmix_DOG
	ENSCAFG00000000267	TNFAIP3	TNFAIP3	1	30247095	30263167	1		TNFAIP3	tumor necrosis factor, alpha-induced protein 3	TNF alpha induced protein 3 [Source:HGNC Symbol;Acc:HGNC:11896]	PCAdmix_DOG
	ENSCAFG00000030892	PERP	PERP	1	30417176	30435995	-1		PERP	PERP, TP53 apoptosis effector	PERP, TP53 apoptosis effector [Source:HGNC Symbol;Acc:HGNC:17637]	PCAdmix_DOG
	ENSCAFG00000000272	ARFGEF3	ARFGEF3	1	30482370	30652027	1		ARFGEF3	ARFGEF family member 3	ARFGEF family member 3 [Source:HGNC Symbol;Acc:HGNC:21213]	PCAdmix_DOG
	ENSCAFG00000000274	HEBP2	HEBP2	1	30716221	30725004	1		HEBP2	heme binding protein 2	heme binding protein 2 [Source:HGNC Symbol;Acc:HGNC:15716]	PCAdmix_DOG
	ENSCAFG00000000275	NHSL1	NHSL1	1	30736957	30871884	-1		NHSL1	NHS-like 1	NHS like 1 [Source:HGNC Symbol;Acc:HGNC:21021]	PCAdmix_DOG
	ENSCAFG00000000277	CCDC28A	CCDC28A	1	31044126	31058582	1		CCDC28A	coiled-coil domain containing 28A	coiled-coil domain containing 28A [Source:HGNC Symbol;Acc:HGNC:21098]	PCAdmix_DOG
	ENSCAFG00000023074			1	31097019	31098664	-1					PCAdmix_DOG
	ENSCAFG00000000279		REPS1	1	31141716	31182350	-1		REPS1	RALBP1 associated Eps domain containing 1		PCAdmix_DOG
	ENSCAFG00000000281	ABRACL	ABRACL	1	31260832	31267446	1		ABRACL	ABRA C-terminal like	ABRA C-terminal like [Source:HGNC Symbol;Acc:HGNC:21230]	PCAdmix_DOG
	ENSCAFG00000000282	HECA	HECA	1	31363170	31373207	1		HECA	hdc homolog, cell cycle regulator	hdc homolog, cell cycle regulator [Source:HGNC Symbol;Acc:HGNC:21041]	PCAdmix_DOG
	ENSCAFG00000000283	TXLNB	TXLNB	1	31417538	31465041	-1		TXLNB	taxilin beta	taxilin beta [Source:HGNC Symbol;Acc:HGNC:21617]	PCAdmix_DOG
	ENSCAFG00000000285	CITED2	CITED2	1	31523799	31524620	-1		CITED2	Cbp/p300-interacting transactivator, with Glu/Asp-rich carboxy-terminal domain, 2	Cbp/p300 interacting transactivator with Glu/Asp rich carboxy-terminal domain 2 [Source:HGNC Symbol;Acc:HGNC:1987]	PCAdmix_DOG
	ENSCAFG00000024055			1	31631159	31631641	-1					PCAdmix_DOG
	ENSCAFG00000000294	NMBR	NMBR	1	33772726	33805347	-1		NMBR	neuromedin B receptor	neuromedin B receptor [Source:HGNC Symbol;Acc:HGNC:7843]	PCAdmix_DOG
	ENSCAFG00000030263	GJE1	GJE1	1	33820248	33822074	1				gap junction protein epsilon 1 [Source:HGNC Symbol;Acc:HGNC:33251]	PCAdmix_DOG
	ENSCAFG00000000295	VTA1	VTA1	1	33830136	33896145	1		VTA1	vesicle (multivesicular body) trafficking 1	vesicle trafficking 1 [Source:HGNC Symbol;Acc:HGNC:20954]	PCAdmix_DOG
	ENSCAFG00000000296	ADGRG6	ADGRG6	1	33969266	34107014	1		ADGRG6	adhesion G protein-coupled receptor G6	adhesion G protein-coupled receptor G6 [Source:HGNC Symbol;Acc:HGNC:13841]	PCAdmix_DOG
	ENSCAFG00000000300	HIVEP2	HIVEP2	1	34367008	34390303	-1		HIVEP2	human immunodeficiency virus type I enhancer binding protein 2	human immunodeficiency virus type I enhancer binding protein 2 [Source:HGNC Symbol;Acc:HGNC:4921]	PCAdmix_DOG
	ENSCAFG00000000303	AIG1	AIG1	1	34642706	34886059	1		AIG1	androgen-induced 1	androgen-induced 1 [Source:HGNC Symbol;Acc:HGNC:21607]	PCAdmix_DOG
	ENSCAFG00000000305	ADAT2	ADAT2	1	34967219	34994020	-1				adenosine deaminase, tRNA specific 2 [Source:HGNC Symbol;Acc:HGNC:21172]	PCAdmix_DOG
	ENSCAFG00000032743			1	35087799	35183661	1					PCAdmix_DOG
	ENSCAFG00000000312	PHACTR2	PHACTR2	1	35220795	35342550	1		PHACTR2	phosphatase and actin regulator 2	phosphatase and actin regulator 2 [Source:HGNC Symbol;Acc:HGNC:20956]	PCAdmix_DOG
	ENSCAFG00000000314		LTV1	1	35360435	35373601	1		LTV1	LTV1 ribosome biogenesis factor		PCAdmix_DOG
	ENSCAFG00000000317	ZC2HC1B	ZC2HC1B	1	35374594	35416197	1		ZC2HC1B	zinc finger, C2HC-type containing 1B	zinc finger C2HC-type containing 1B [Source:HGNC Symbol;Acc:HGNC:21174]	PCAdmix_DOG
	ENSCAFG00000000318	PLAGL1	PLAGL1	1	35418400	35425360	-1		PLAGL1	pleiomorphic adenoma gene-like 1	PLAG1 like zinc finger 1 [Source:HGNC Symbol;Acc:HGNC:9046]	PCAdmix_DOG
	ENSCAFG00000032495	SF3B5	SF3B5	1	35558602	35558859	-1		SF3B5	splicing factor 3b, subunit 5, 10kDa	splicing factor 3b subunit 5 [Source:HGNC Symbol;Acc:HGNC:21083]	PCAdmix_DOG
	ENSCAFG00000000322	STX11	STX11	1	35643440	35644303	1		STX11	syntaxin 11	syntaxin 11 [Source:HGNC Symbol;Acc:HGNC:11429]	PCAdmix_DOG
	ENSCAFG00000032046			1	35655086	35655457	-1					PCAdmix_DOG
	ENSCAFG00000000326		UTRN	1	35727462	36225845	1		UTRN	utrophin		PCAdmix_DOG
	ENSCAFG00000000329	EPM2A	EPM2A	1	36869146	36977469	-1				epilepsy, progressive myoclonus type 2A, Lafora disease (laforin) [Source:HGNC Symbol;Acc:HGNC:3413]	PCAdmix_DOG
	ENSCAFG00000000330	FBXO30	FBXO30	1	37010033	37016986	-1		FBXO30	F-box protein 30	F-box protein 30 [Source:HGNC Symbol;Acc:HGNC:15600]	PCAdmix_DOG
	ENSCAFG00000000331			1	37066187	37066615	-1					PCAdmix_DOG
	ENSCAFG00000000335	SHPRH	SHPRH	1	37074382	37170720	-1		SHPRH	SNF2 histone linker PHD RING helicase, E3 ubiquitin protein ligase	SNF2 histone linker PHD RING helicase [Source:HGNC Symbol;Acc:HGNC:19336]	PCAdmix_DOG
	ENSCAFG00000000338	GRM1	GRM1	1	37207537	37600908	1	Ataxia cerebellar	GRM1	glutamate receptor, metabotropic 1	glutamate metabotropic receptor 1 [Source:HGNC Symbol;Acc:HGNC:4593]	PCAdmix_DOG
	ENSCAFG00000030384	RAB32	RAB32	1	37706423	37721782	1				RAB32, member RAS oncogene family [Source:HGNC Symbol;Acc:HGNC:9772]	PCAdmix_DOG
	ENSCAFG00000023693	ADGB	ADGB	1	37752823	37915540	1		ADGB	androglobin	androglobin [Source:HGNC Symbol;Acc:HGNC:21212]	PCAdmix_DOG
	ENSCAFG00000000366	SASH1	SASH1	1	39281426	39478127	1		SASH1	SAM and SH3 domain containing 1	SAM and SH3 domain containing 1 [Source:HGNC Symbol;Acc:HGNC:19182]	PCAdmix_DOG
	ENSCAFG00000000373	TAB2	TAB2	1	40149569	40215208	1		TAB2	TGF-beta activated kinase 1/MAP3K7 binding protein 2	TGF-beta activated kinase 1/MAP3K7 binding protein 2 [Source:HGNC Symbol;Acc:HGNC:17075]	PCAdmix_DOG
	ENSCAFG00000000375	ZC3H12D	ZC3H12D	1	40251879	40279351	-1				zinc finger CCCH-type containing 12D [Source:HGNC Symbol;Acc:HGNC:21175]	PCAdmix_DOG
	ENSCAFG00000000387	LATS1	LATS1	1	40260064	40474194	-1		LATS1	large tumor suppressor kinase 1	large tumor suppressor kinase 1 [Source:HGNC Symbol;Acc:HGNC:6514]	PCAdmix_DOG
	ENSCAFG00000000379	PPIL4	PPIL4	1	40294577	40342166	-1		PPIL4	peptidylprolyl isomerase (cyclophilin)-like 4	peptidyl-prolyl cis-trans isomerase-like 4 [Source:RefSeq peptide;Acc:NP_001273921]	PCAdmix_DOG
	ENSCAFG00000032487	GINM1	GINM1	1	40349382	40378718	1				glycoprotein integral membrane 1 [Source:HGNC Symbol;Acc:HGNC:21074]	PCAdmix_DOG
	ENSCAFG00000000385	KATNA1	KATNA1	1	40376322	40423351	-1		KATNA1	katanin p60 (ATPase containing) subunit A 1	katanin catalytic subunit A1 [Source:HGNC Symbol;Acc:HGNC:6216]	PCAdmix_DOG
	ENSCAFG00000000390	NUP43	NUP43	1	40479379	40492143	-1		NUP43	nucleoporin 43kDa	nucleoporin 43 [Source:HGNC Symbol;Acc:HGNC:21182]	PCAdmix_DOG
	ENSCAFG00000000393	PCMT1	PCMT1	1	40494461	40540494	1		PCMT1	protein-L-isoaspartate (D-aspartate) O-methyltransferase	protein-L-isoaspartate (D-aspartate) O-methyltransferase [Source:HGNC Symbol;Acc:HGNC:8728]	PCAdmix_DOG
	ENSCAFG00000000398	LRP11	LRP11	1	40544000	40590569	-1		LRP11	low density lipoprotein receptor-related protein 11	LDL receptor related protein 11 [Source:HGNC Symbol;Acc:HGNC:16936]	PCAdmix_DOG
	ENSCAFG00000024105	RAET1E	RAET1E	1	40602291	40604598	-1				retinoic acid early transcript 1E [Source:HGNC Symbol;Acc:HGNC:16793]	PCAdmix_DOG
	ENSCAFG00000000399			1	40635694	40637301	1					PCAdmix_DOG
	ENSCAFG00000000402		PPP1R14C	1	40710319	40795883	1		PPP1R14C	protein phosphatase 1, regulatory (inhibitor) subunit 14C		PCAdmix_DOG
	ENSCAFG00000000405	PLEKHG1	PLEKHG1	1	41129258	41297386	1		PLEKHG1	pleckstrin homology domain containing, family G (with RhoGef domain) member 1	pleckstrin homology and RhoGEF domain containing G1 [Source:HGNC Symbol;Acc:HGNC:20884]	PCAdmix_DOG
	ENSCAFG00000000413	MTHFD1L	MTHFD1L	1	41316274	41498075	1		MTHFD1L	methylenetetrahydrofolate dehydrogenase (NADP+ dependent) 1-like	methylenetetrahydrofolate dehydrogenase (NADP+ dependent) 1-like [Source:HGNC Symbol;Acc:HGNC:21055]	PCAdmix_DOG
	ENSCAFG00000029168			1	41592473	41593630	1					PCAdmix_DOG
	ENSCAFG00000000419	AKAP12	AKAP12	1	41614908	41711677	1		AKAP12	A kinase (PRKA) anchor protein 12	A-kinase anchoring protein 12 [Source:HGNC Symbol;Acc:HGNC:370]	PCAdmix_DOG
	ENSCAFG00000000421			1	41692376	41693699	-1					PCAdmix_DOG
	ENSCAFG00000000422	ZBTB2	ZBTB2	1	41718419	41743392	-1				zinc finger and BTB domain containing 2 [Source:HGNC Symbol;Acc:HGNC:20868]	PCAdmix_DOG
	ENSCAFG00000000423	RMND1	RMND1	1	41755054	41799847	-1				required for meiotic nuclear division 1 homolog [Source:HGNC Symbol;Acc:HGNC:21176]	PCAdmix_DOG
	ENSCAFG00000000425	ARMT1	ARMT1	1	41799948	41814964	1		ARMT1	acidic residue methyltransferase 1	acidic residue methyltransferase 1 [Source:HGNC Symbol;Acc:HGNC:17872]	PCAdmix_DOG
	ENSCAFG00000000429	CCDC170	CCDC170	1	41857511	41934145	1		CCDC170	coiled-coil domain containing 170	coiled-coil domain containing 170 [Source:HGNC Symbol;Acc:HGNC:21177]	PCAdmix_DOG
	ENSCAFG00000000430	ESR1	ESR1	1	42081316	42368689	1		ESR1	estrogen receptor 1	estrogen receptor [Source:RefSeq peptide;Acc:NP_001273887]	PCAdmix_DOG
	ENSCAFG00000000445	SYNE1	SYNE1	1	42379716	42831889	-1		SYNE1	spectrin repeat containing, nuclear envelope 1	spectrin repeat containing nuclear envelope protein 1 [Source:HGNC Symbol;Acc:HGNC:17089]	PCAdmix_DOG
	ENSCAFG00000000535	MYCT1	MYCT1	1	42886756	42908968	1		MYCT1	myc target 1	myc target 1 [Source:HGNC Symbol;Acc:HGNC:23172]	PCAdmix_DOG
	ENSCAFG00000000538	VIP	VIP	1	42941849	42950730	1		VIP	vasoactive intestinal peptide	vasoactive intestinal peptide [Source:HGNC Symbol;Acc:HGNC:12693]	PCAdmix_DOG
	ENSCAFG00000000547	FBXO5	FBXO5	1	43138219	43149025	-1		FBXO5	F-box protein 5	F-box protein 5 [Source:HGNC Symbol;Acc:HGNC:13584]	PCAdmix_DOG
	ENSCAFG00000000549	MTRF1L	MTRF1L	1	43155449	43162889	-1				mitochondrial translational release factor 1 like [Source:HGNC Symbol;Acc:HGNC:21051]	PCAdmix_DOG
	ENSCAFG00000000550	RGS17	RGS17	1	43174894	43264285	-1		RGS17	regulator of G-protein signaling 17	regulator of G-protein signaling 17 [Source:HGNC Symbol;Acc:HGNC:14088]	PCAdmix_DOG
	ENSCAFG00000000562		CNKSR3	1	44071408	44361145	-1		CNKSR3	CNKSR family member 3		PCAdmix_DOG
	ENSCAFG00000000570	SCAF8	SCAF8	1	44562567	44636543	1		SCAF8	SR-related CTD-associated factor 8	SR-related CTD associated factor 8 [Source:HGNC Symbol;Acc:HGNC:20959]	PCAdmix_DOG
	ENSCAFG00000000589	NOX3	NOX3	1	45126959	45186510	-1		NOX3	NADPH oxidase 3	NADPH oxidase 3 [Source:RefSeq peptide;Acc:NP_001095303]	PCAdmix_DOG
	ENSCAFG00000000608	ARID1B	ARID1B	1	46370636	46799104	1				AT-rich interaction domain 1B [Source:HGNC Symbol;Acc:HGNC:18040]	PCAdmix_DOG
	ENSCAFG00000000616	TMEM242	TMEM242	1	46872565	46900911	-1		TMEM242	transmembrane protein 242	transmembrane protein 242 [Source:HGNC Symbol;Acc:HGNC:17206]	PCAdmix_DOG
	ENSCAFG00000028896			1	46941721	46942998	1					PCAdmix_DOG
	ENSCAFG00000000618	ZDHHC14	ZDHHC14	1	46943590	47216251	1		ZDHHC14	zinc finger, DHHC-type containing 14	zinc finger DHHC-type containing 14 [Source:HGNC Symbol;Acc:HGNC:20341]	PCAdmix_DOG
	ENSCAFG00000000627	SNX9	SNX9	1	47343668	47455843	1		SNX9	sorting nexin 9	sorting nexin 9 [Source:HGNC Symbol;Acc:HGNC:14973]	PCAdmix_DOG
	ENSCAFG00000000644	SYNJ2	SYNJ2	1	47508416	47579534	1				synaptojanin 2 [Source:HGNC Symbol;Acc:HGNC:11504]	PCAdmix_DOG
	ENSCAFG00000000647	SERAC1	SERAC1	1	47600751	47661456	-1		SERAC1	serine active site containing 1	serine active site containing 1 [Source:HGNC Symbol;Acc:HGNC:21061]	PCAdmix_DOG
	ENSCAFG00000032740	GTF2H5	GTF2H5	1	47670180	47681086	1		GTF2H5	general transcription factor IIH, polypeptide 5	general transcription factor IIH subunit 5 [Source:HGNC Symbol;Acc:HGNC:21157]	PCAdmix_DOG
	ENSCAFG00000000652	TULP4	TULP4	1	47791993	47955384	1		TULP4	tubby like protein 4	tubby like protein 4 [Source:HGNC Symbol;Acc:HGNC:15530]	PCAdmix_DOG
	ENSCAFG00000000655	TMEM181	TMEM181	1	47982712	48058322	1				transmembrane protein 181 [Source:HGNC Symbol;Acc:HGNC:20958]	PCAdmix_DOG
	ENSCAFG00000000657			1	48058392	48066999	-1					PCAdmix_DOG
	ENSCAFG00000000659	SYTL3	SYTL3	1	48067612	48159754	1		SYTL3	synaptotagmin-like 3	synaptotagmin like 3 [Source:HGNC Symbol;Acc:HGNC:15587]	PCAdmix_DOG
	ENSCAFG00000000661	EZR	EZR	1	48161362	48210131	-1		EZR	ezrin	ezrin [Source:RefSeq peptide;Acc:NP_001273918]	PCAdmix_DOG
	ENSCAFG00000000664	RSPH3	RSPH3	1	48325805	48349371	-1		RSPH3	radial spoke 3 homolog (Chlamydomonas)	radial spoke 3 homolog [Source:HGNC Symbol;Acc:HGNC:21054]	PCAdmix_DOG
	ENSCAFG00000000665	TAGAP	TAGAP	1	48382147	48392234	-1		TAGAP	T-cell activation RhoGTPase activating protein	T-cell activation RhoGTPase activating protein [Source:HGNC Symbol;Acc:HGNC:15669]	PCAdmix_DOG
	ENSCAFG00000000667	FNDC1	FNDC1	1	48501744	48604873	1		FNDC1	fibronectin type III domain containing 1	fibronectin type III domain containing 1 [Source:HGNC Symbol;Acc:HGNC:21184]	PCAdmix_DOG
	ENSCAFG00000000920	VGLL2	VGLL2	1	57530121	57537960	1		VGLL2	vestigial-like family member 2	vestigial like family member 2 [Source:HGNC Symbol;Acc:HGNC:20232]	PCAdmix_DOG
	ENSCAFG00000000923	ROS1	ROS1	1	57556316	57677624	-1		ROS1	ROS proto-oncogene 1 , receptor tyrosine kinase	ROS proto-oncogene 1, receptor tyrosine kinase [Source:HGNC Symbol;Acc:HGNC:10261]	PCAdmix_DOG
	ENSCAFG00000000925	DCBLD1	DCBLD1	1	57733266	57776366	1				discoidin, CUB and LCCL domain containing 1 [Source:HGNC Symbol;Acc:HGNC:21479]	PCAdmix_DOG
	ENSCAFG00000000928		GOPC	1	57787462	57828820	-1		GOPC	golgi-associated PDZ and coiled-coil motif containing		PCAdmix_DOG
	ENSCAFG00000000929			1	57855893	57857840	1					PCAdmix_DOG
	ENSCAFG00000000931	NUS1	NUS1	1	57866879	57896517	1		NUS1	NUS1 dehydrodolichyl diphosphate synthase subunit	NUS1 dehydrodolichyl diphosphate synthase subunit [Source:HGNC Symbol;Acc:HGNC:21042]	PCAdmix_DOG
	ENSCAFG00000000932	SLC35F1	SLC35F1	1	58253306	58401134	1		SLC35F1	solute carrier family 35, member F1	solute carrier family 35 member F1 [Source:HGNC Symbol;Acc:HGNC:21483]	PCAdmix_DOG
	ENSCAFG00000000935	CEP85L	CEP85L	1	58494598	58637626	-1		CEP85L	centrosomal protein 85kDa-like	centrosomal protein 85 like [Source:HGNC Symbol;Acc:HGNC:21638]	PCAdmix_DOG
	ENSCAFG00000000938	MCM9	MCM9	1	58763673	58862727	-1		MCM9	minichromosome maintenance 9 homologous recombination repair factor	minichromosome maintenance 9 homologous recombination repair factor [Source:HGNC Symbol;Acc:HGNC:21484]	PCAdmix_DOG
	ENSCAFG00000000939	ASF1A	ASF1A	1	58821242	58833494	1		ASF1A	anti-silencing function 1A histone chaperone	anti-silencing function 1A histone chaperone [Source:HGNC Symbol;Acc:HGNC:20995]	PCAdmix_DOG
	ENSCAFG00000000942	FAM184A	FAM184A	1	58905186	59012202	-1		FAM184A	family with sequence similarity 184, member A	family with sequence similarity 184 member A [Source:HGNC Symbol;Acc:HGNC:20991]	PCAdmix_DOG
	ENSCAFG00000000945	MAN1A1	MAN1A1	1	59106601	59273494	-1		MAN1A1	mannosidase, alpha, class 1A, member 1	mannosidase alpha class 1A member 1 [Source:HGNC Symbol;Acc:HGNC:6821]	PCAdmix_DOG
	ENSCAFG00000000955	TBC1D32	TBC1D32	1	60667860	60873614	-1		TBC1D32	TBC1 domain family, member 32	TBC1 domain family member 32 [Source:HGNC Symbol;Acc:HGNC:21485]	PCAdmix_DOG
	ENSCAFG00000000969	HSF2	HSF2	1	61776530	61810619	1				heat shock transcription factor 2 [Source:HGNC Symbol;Acc:HGNC:5225]	PCAdmix_DOG
	ENSCAFG00000000989	SERINC1	SERINC1	1	61814869	61845228	-1		SERINC1	serine incorporator 1	serine incorporator 1 [Source:HGNC Symbol;Acc:HGNC:13464]	PCAdmix_DOG
	ENSCAFG00000029950	PKIB	PKIB	1	62026400	62049793	1		PKIB	protein kinase (cAMP-dependent, catalytic) inhibitor beta	protein kinase (cAMP-dependent, catalytic) inhibitor beta [Source:HGNC Symbol;Acc:HGNC:9018]	PCAdmix_DOG
	ENSCAFG00000000996	FABP7	FABP7	1	62084557	62088231	1		FABP7	fatty acid binding protein 7, brain	fatty acid binding protein 7 [Source:HGNC Symbol;Acc:HGNC:3562]	PCAdmix_DOG
	ENSCAFG00000001002	SMPDL3A	SMPDL3A	1	62092121	62110299	1		SMPDL3A	sphingomyelin phosphodiesterase, acid-like 3A	sphingomyelin phosphodiesterase acid like 3A [Source:HGNC Symbol;Acc:HGNC:17389]	PCAdmix_DOG
	ENSCAFG00000001006	CLVS2	CLVS2	1	62217443	62282412	1		CLVS2	clavesin 2	clavesin 2 [Source:HGNC Symbol;Acc:HGNC:23046]	PCAdmix_DOG
	ENSCAFG00000001016	TRDN	TRDN	1	62398005	62763030	-1		TRDN	triadin	triadin [Source:RefSeq peptide;Acc:NP_001003154]	PCAdmix_DOG
	ENSCAFG00000001026			1	63562209	63852095	1					PCAdmix_DOG
	ENSCAFG00000001028			1	63962455	64084850	1					PCAdmix_DOG
	ENSCAFG00000001029	TPD52L1	TPD52L1	1	64165718	64217711	1		TPD52L1	tumor protein D52-like 1	tumor protein D52-like 1 [Source:HGNC Symbol;Acc:HGNC:12006]	PCAdmix_DOG
	ENSCAFG00000001030	HDDC2	HDDC2	1	64222094	64247448	-1				HD domain containing 2 [Source:HGNC Symbol;Acc:HGNC:21078]	PCAdmix_DOG
	ENSCAFG00000032212			1	64632817	64639858	1					PCAdmix_DOG
	ENSCAFG00000001047	NCOA7	NCOA7	1	64689532	64815443	1		NCOA7	nuclear receptor coactivator 7	nuclear receptor coactivator 7 [Source:HGNC Symbol;Acc:HGNC:21081]	PCAdmix_DOG
	ENSCAFG00000001052	HINT3	HINT3	1	64834774	64848389	1				histidine triad nucleotide binding protein 3 [Source:HGNC Symbol;Acc:HGNC:18468]	PCAdmix_DOG
	ENSCAFG00000001057	TRMT11	TRMT11	1	64861441	64917622	1		TRMT11	tRNA methyltransferase 11 homolog (S. cerevisiae)	tRNA methyltransferase 11 homolog [Source:HGNC Symbol;Acc:HGNC:21080]	PCAdmix_DOG
	ENSCAFG00000001059			1	64892640	64893170	-1					PCAdmix_DOG
	ENSCAFG00000029836	CENPW	CENPW	1	65171689	65179355	1		CENPW	centromere protein W	centromere protein W [Source:HGNC Symbol;Acc:HGNC:21488]	PCAdmix_DOG
	ENSCAFG00000030574			1	65852930	65858669	1					PCAdmix_DOG
	ENSCAFG00000001067	RSPO3	RSPO3	1	65858789	65936372	1				R-spondin 3 [Source:HGNC Symbol;Acc:HGNC:20866]	PCAdmix_DOG
	ENSCAFG00000001068	RNF146	RNF146	1	65988549	66010195	1		RNF146	ring finger protein 146	ring finger protein 146 [Source:HGNC Symbol;Acc:HGNC:21336]	PCAdmix_DOG
	ENSCAFG00000001069	ECHDC1	ECHDC1	1	66012858	66057807	-1		ECHDC1	ethylmalonyl-CoA decarboxylase 1	ethylmalonyl-CoA decarboxylase 1 [Source:HGNC Symbol;Acc:HGNC:21489]	PCAdmix_DOG
	ENSCAFG00000032758			1	66136332	66143074	-1					PCAdmix_DOG
	ENSCAFG00000001071		SOGA3	1	66160771	66207387	-1		SOGA3	SOGA family member 3		PCAdmix_DOG
	ENSCAFG00000001072	C6orf58	C6orf58	1	66270560	66281061	1				chromosome 6 open reading frame 58 [Source:HGNC Symbol;Acc:HGNC:20960]	PCAdmix_DOG
	ENSCAFG00000001074		LOC612694	1	66312213	66331231	-1		LOC612694	protein LEG1 homolog		PCAdmix_DOG
	ENSCAFG00000001078	THEMIS	THEMIS	1	66363181	66540291	-1		THEMIS	thymocyte selection associated	thymocyte selection associated [Source:HGNC Symbol;Acc:HGNC:21569]	PCAdmix_DOG
	ENSCAFG00000001101	PTPRK	PTPRK	1	66594435	67022632	-1		PTPRK	protein tyrosine phosphatase, receptor type, K	protein tyrosine phosphatase, receptor type K [Source:HGNC Symbol;Acc:HGNC:9674]	PCAdmix_DOG
	ENSCAFG00000001106	LAMA2	LAMA2	1	67514264	68100315	1				laminin subunit alpha 2 [Source:HGNC Symbol;Acc:HGNC:6482]	PCAdmix_DOG
	ENSCAFG00000001114	ARHGAP18	ARHGAP18	1	68145106	68201230	-1		ARHGAP18	Rho GTPase activating protein 18	rho GTPase-activating protein 18 [Source:RefSeq peptide;Acc:NP_001273896]	PCAdmix_DOG
	ENSCAFG00000001115	L3MBTL3	L3MBTL3	1	68542001	68654390	1				l(3)mbt-like 3 (Drosophila) [Source:HGNC Symbol;Acc:HGNC:23035]	PCAdmix_DOG
	ENSCAFG00000001116	SAMD3	SAMD3	1	68658679	68695791	-1		SAMD3	sterile alpha motif domain containing 3	sterile alpha motif domain containing 3 [Source:HGNC Symbol;Acc:HGNC:21574]	PCAdmix_DOG
	ENSCAFG00000001117	TMEM200A	TMEM200A	1	68847264	68848739	1		TMEM200A	transmembrane protein 200A	transmembrane protein 200A [Source:HGNC Symbol;Acc:HGNC:21075]	PCAdmix_DOG
	ENSCAFG00000001136	EPB41L2	EPB41L2	1	69131759	69224565	-1		EPB41L2	erythrocyte membrane protein band 4.1-like 2	erythrocyte membrane protein band 4.1 like 2 [Source:HGNC Symbol;Acc:HGNC:3379]	PCAdmix_DOG
	ENSCAFG00000001144			1	69200523	69201470	1					PCAdmix_DOG
	ENSCAFG00000001147	AKAP7	AKAP7	1	69361015	69483139	1		AKAP7	A kinase (PRKA) anchor protein 7	A-kinase anchoring protein 7 [Source:HGNC Symbol;Acc:HGNC:377]	PCAdmix_DOG
	ENSCAFG00000028602			1	69383743	69384003	-1					PCAdmix_DOG
	ENSCAFG00000032104			1	69687536	69688546	1					PCAdmix_DOG
	ENSCAFG00000013574		LOC606788	1	69725989	69732581	1		LOC606788	spermatogenesis-associated protein 31A6		PCAdmix_DOG
	ENSCAFG00000001149	CTSL	CTSL	1	69937870	69943012	1		CTSV	cathepsin V	Cathepsin L1 Cathepsin L1 heavy chain Cathepsin L1 light chain [Source:UniProtKB/Swiss-Prot;Acc:Q9GL24]	PCAdmix_DOG
	ENSCAFG00000030584	ZNF782	ZNF782	1	70049818	70110006	1		ZNF782	zinc finger protein 782	zinc finger protein 782 [Source:HGNC Symbol;Acc:HGNC:33110]	PCAdmix_DOG
	ENSCAFG00000029119	ZNF510	ZNF510	1	70171430	70176078	1		ZNF510	zinc finger protein 510	zinc finger protein 510 [Source:HGNC Symbol;Acc:HGNC:29161]	PCAdmix_DOG
	ENSCAFG00000001198	AAED1	AAED1	1	70199363	70208534	1		AAED1	AhpC/TSA antioxidant enzyme domain containing 1	AhpC/TSA antioxidant enzyme domain containing 1 [Source:HGNC Symbol;Acc:HGNC:16881]	PCAdmix_DOG
	ENSCAFG00000030594			1	70213726	70215107	1					PCAdmix_DOG
	ENSCAFG00000001201	CDC14B	CDC14B	1	70277119	70323740	1		CDC14B	cell division cycle 14B	cell division cycle 14B [Source:HGNC Symbol;Acc:HGNC:1719]	PCAdmix_DOG
	ENSCAFG00000001205	HABP4	HABP4	1	70340538	70377231	-1		HABP4	hyaluronan binding protein 4	hyaluronan binding protein 4 [Source:HGNC Symbol;Acc:HGNC:17062]	PCAdmix_DOG
	ENSCAFG00000001207			1	70396030	70396624	1					PCAdmix_DOG
	ENSCAFG00000001213	ZNF367	ZNF367	1	70461776	70483053	1		ZNF367	zinc finger protein 367	zinc finger protein 367 [Source:HGNC Symbol;Acc:HGNC:18320]	PCAdmix_DOG
	ENSCAFG00000001216	SLC35D2	SLC35D2	1	70487640	70535520	1		SLC35D2	solute carrier family 35 (UDP-GlcNAc/UDP-glucose transporter), member D2	solute carrier family 35 member D2 [Source:HGNC Symbol;Acc:HGNC:20799]	PCAdmix_DOG
	ENSCAFG00000001218	HSD17B3	HSD17B3	1	70550942	70585751	1		HSD17B3	hydroxysteroid (17-beta) dehydrogenase 3	hydroxysteroid 17-beta dehydrogenase 3 [Source:HGNC Symbol;Acc:HGNC:5212]	PCAdmix_DOG
	ENSCAFG00000001219	ERCC6L2	ERCC6L2	1	70793834	70917926	-1				ERCC excision repair 6 like 2 [Source:HGNC Symbol;Acc:HGNC:26922]	PCAdmix_DOG
	ENSCAFG00000001246	PTCH1	PTCH1	1	71246765	71305661	1		PTCH1	patched 1	patched 1 [Source:HGNC Symbol;Acc:HGNC:9585]	PCAdmix_DOG
	ENSCAFG00000001286	FANCC	FANCC	1	71388930	71749787	1		FANCC	Fanconi anemia, complementation group C	Fanconi anemia complementation group C [Source:HGNC Symbol;Acc:HGNC:3584]	PCAdmix_DOG
	ENSCAFG00000023549	C9orf3	C9orf3	1	71679884	72009343	-1		C1H9orf3	chromosome 1 open reading frame, human C9orf3	chromosome 9 open reading frame 3 [Source:HGNC Symbol;Acc:HGNC:1361]	PCAdmix_DOG
	ENSCAFG00000001305	FBP1	FBP1	1	72099571	72125606	1		FBP1	fructose-1,6-bisphosphatase 1	fructose-bisphosphatase 1 [Source:HGNC Symbol;Acc:HGNC:3606]	PCAdmix_DOG
	ENSCAFG00000023446	FBP2	FBP2	1	72135802	72168485	1		LOC476300	fructose-1,6-bisphosphatase isozyme 2	fructose-bisphosphatase 2 [Source:HGNC Symbol;Acc:HGNC:3607]	PCAdmix_DOG
	ENSCAFG00000001309		CTSL3	1	72215924	72219117	-1		CTSL3	cathepsin L family member 3		PCAdmix_DOG
	ENSCAFG00000001316	DAPK1	DAPK1	1	72278835	72447794	-1		DAPK1	death-associated protein kinase 1	death associated protein kinase 1 [Source:HGNC Symbol;Acc:HGNC:2674]	PCAdmix_DOG
	ENSCAFG00000023269	GAS1	GAS1	1	72927796	72928824	1		GAS1	growth arrest-specific 1	growth arrest specific 1 [Source:HGNC Symbol;Acc:HGNC:4165]	PCAdmix_DOG
	ENSCAFG00000004313	PPP5C	PPP5C	1	109454151	109467057	-1				protein phosphatase 5 catalytic subunit [Source:HGNC Symbol;Acc:HGNC:9322]	PCAdmix_DOG
	ENSCAFG00000004349			1	109554473	109555459	1					PCAdmix_DOG
	ENSCAFG00000023855	IGFL3	IGFL3	1	109576513	109578358	1		LOC612207	insulin growth factor-like family member 3	IGF like family member 3 [Source:HGNC Symbol;Acc:HGNC:32930]	PCAdmix_DOG
	ENSCAFG00000004357	CCDC61	CCDC61	1	109605098	109643026	-1		CCDC61	coiled-coil domain containing 61	coiled-coil domain containing 61 [Source:HGNC Symbol;Acc:HGNC:33629]	PCAdmix_DOG
	ENSCAFG00000029461	PGLYRP1	PGLYRP1	1	109614437	109621593	1		PGLYRP1	peptidoglycan recognition protein 1	peptidoglycan recognition protein 1 [Source:HGNC Symbol;Acc:HGNC:8904]	PCAdmix_DOG
	ENSCAFG00000024617	PCDHB1	PCDHB1	2	36136681	36139137	1		PCDHB1	protocadherin beta 1	protocadherin beta 1 [Source:HGNC Symbol;Acc:HGNC:8680]	PCAdmix_DOG
	ENSCAFG00000024614	PCDHB2	PCDHB2	2	36157921	36255507	1		LOC106557817	protocadherin beta-2-like	protocadherin beta 2 [Source:HGNC Symbol;Acc:HGNC:8687]	PCAdmix_DOG
	ENSCAFG00000006106	PCDHB4	PCDHB4	2	36179982	36194986	1		LOC100855970	protocadherin beta-4	protocadherin beta 4 [Source:HGNC Symbol;Acc:HGNC:8689]	PCAdmix_DOG
	ENSCAFG00000030815	PCDHB15	PCDHB15	2	36251467	36253868	1		LOC487178	protocadherin beta-15	protocadherin beta 15 [Source:HGNC Symbol;Acc:HGNC:8686]	PCAdmix_DOG
	ENSCAFG00000006109	SLC25A2	SLC25A2	2	36286584	36287489	-1		LOC102151234	mitochondrial ornithine transporter 1-like	solute carrier family 25 member 2 [Source:HGNC Symbol;Acc:HGNC:22921]	PCAdmix_DOG
	ENSCAFG00000006114	TAF7	TAF7	2	36295911	36296960	-1		TAF7	TAF7 RNA polymerase II, TATA box binding protein (TBP)-associated factor, 55kDa	TATA-box binding protein associated factor 7 [Source:HGNC Symbol;Acc:HGNC:11541]	PCAdmix_DOG
	ENSCAFG00000023682	PCDHGA1	PCDHGA1	2	36307941	36311148	1				protocadherin gamma subfamily A, 1 [Source:HGNC Symbol;Acc:HGNC:8696]	PCAdmix_DOG
	ENSCAFG00000030567			2	36317518	36322334	1					PCAdmix_DOG
	ENSCAFG00000031886	PCDHGB1	PCDHGB1	2	36326827	36329262	1		LOC478038	protocadherin gamma-C5	protocadherin gamma subfamily B, 1 [Source:HGNC Symbol;Acc:HGNC:8708]	PCAdmix_DOG
	ENSCAFG00000028543			2	36356770	36357036	1					PCAdmix_DOG
	ENSCAFG00000006086	PCDHGC5	PCDHGC5	2	36393893	36480128	1		LOC478038	protocadherin gamma-C5	protocadherin gamma subfamily C, 5 [Source:HGNC Symbol;Acc:HGNC:8718]	PCAdmix_DOG
	ENSCAFG00000006149	DIAPH1	DIAPH1	2	36482588	36581791	-1		DIAPH1	diaphanous-related formin 1	diaphanous related formin 1 [Source:HGNC Symbol;Acc:HGNC:2876]	PCAdmix_DOG
	ENSCAFG00000006173	HDAC3	HDAC3	2	36582474	36597682	-1		HDAC3	histone deacetylase 3	histone deacetylase 3 [Source:HGNC Symbol;Acc:HGNC:4854]	PCAdmix_DOG
	ENSCAFG00000006185	RELL2	RELL2	2	36599086	36601377	1		RELL2	RELT-like 2	RELT like 2 [Source:HGNC Symbol;Acc:HGNC:26902]	PCAdmix_DOG
	ENSCAFG00000006203	FCHSD1	FCHSD1	2	36602463	36612199	-1		FCHSD1	FCH and double SH3 domains 1	FCH and double SH3 domains 1 [Source:HGNC Symbol;Acc:HGNC:25463]	PCAdmix_DOG
	ENSCAFG00000006214	ARAP3	ARAP3	2	36612803	36637586	-1		ARAP3	ArfGAP with RhoGAP domain, ankyrin repeat and PH domain 3	ArfGAP with RhoGAP domain, ankyrin repeat and PH domain 3 [Source:HGNC Symbol;Acc:HGNC:24097]	PCAdmix_DOG
	ENSCAFG00000006229	PCDH1	PCDH1	2	36813586	36836467	-1		PCDH1	protocadherin 1	protocadherin 1 [Source:HGNC Symbol;Acc:HGNC:8655]	PCAdmix_DOG
	ENSCAFG00000006236	KIAA0141	KIAA0141	2	36865402	36883751	1		KIAA0141	KIAA0141 ortholog	KIAA0141 [Source:HGNC Symbol;Acc:HGNC:28969]	PCAdmix_DOG
	ENSCAFG00000006239	PCDH12	PCDH12	2	36884165	36900729	-1		PCDH12	protocadherin 12	protocadherin 12 [Source:HGNC Symbol;Acc:HGNC:8657]	PCAdmix_DOG
	ENSCAFG00000006241	RNF14	RNF14	2	36911398	36928869	1		RNF14	ring finger protein 14	ring finger protein 14 [Source:HGNC Symbol;Acc:HGNC:10058]	PCAdmix_DOG
	ENSCAFG00000006243	GNPDA1	GNPDA1	2	36939973	36949708	-1		GNPDA1	glucosamine-6-phosphate deaminase 1	glucosamine-6-phosphate deaminase 1 [Source:HGNC Symbol;Acc:HGNC:4417]	PCAdmix_DOG
	ENSCAFG00000006249	NDFIP1	NDFIP1	2	37041969	37066409	1		NDFIP1	Nedd4 family interacting protein 1	Nedd4 family interacting protein 1 [Source:HGNC Symbol;Acc:HGNC:17592]	PCAdmix_DOG
	ENSCAFG00000006250	SPRY4	SPRY4	2	37203612	37204571	-1		SPRY4	sprouty RTK signaling antagonist 4	sprouty RTK signaling antagonist 4 [Source:HGNC Symbol;Acc:HGNC:15533]	PCAdmix_DOG
	ENSCAFG00000031965	FGF1	FGF1	2	37467135	37489065	-1		FGF1	fibroblast growth factor 1 (acidic)	fibroblast growth factor 1 [Source:HGNC Symbol;Acc:HGNC:3665]	PCAdmix_DOG
	ENSCAFG00000006266	ARHGAP26	ARHGAP26	2	37627422	38039759	1		ARHGAP26	Rho GTPase activating protein 26	Rho GTPase activating protein 26 [Source:HGNC Symbol;Acc:HGNC:17073]	PCAdmix_DOG
	ENSCAFG00000006326	KCTD16	KCTD16	2	38942026	39141265	1				potassium channel tetramerization domain containing 16 [Source:HGNC Symbol;Acc:HGNC:29244]	PCAdmix_DOG
	ENSCAFG00000031541	PRELID2	PRELID2	2	40222441	40277544	-1		PRELID2	PRELI domain containing 2	PRELI domain containing 2 [Source:HGNC Symbol;Acc:HGNC:28306]	PCAdmix_DOG
	ENSCAFG00000023537	GRXCR2	GRXCR2	2	40314152	40328240	-1		GRXCR2	glutaredoxin, cysteine rich 2	glutaredoxin and cysteine rich domain containing 2 [Source:HGNC Symbol;Acc:HGNC:33862]	PCAdmix_DOG
	ENSCAFG00000006409	SH3RF2	SH3RF2	2	40369107	40499810	1		SH3RF2	SH3 domain containing ring finger 2	SH3 domain containing ring finger 2 [Source:HGNC Symbol;Acc:HGNC:26299]	PCAdmix_DOG
	ENSCAFG00000006419	PLAC8L1	PLAC8L1	2	40517141	40534858	-1		PLAC8L1	PLAC8-like 1	PLAC8-like 1 [Source:HGNC Symbol;Acc:HGNC:31746]	PCAdmix_DOG
	ENSCAFG00000006431	LARS	LARS	2	40544232	40619382	-1		LARS	leucyl-tRNA synthetase	leucyl-tRNA synthetase [Source:HGNC Symbol;Acc:HGNC:6512]	PCAdmix_DOG
	ENSCAFG00000006456		RBM27	2	40633925	40711448	1		RBM27	RNA binding motif protein 27		PCAdmix_DOG
	ENSCAFG00000006473	POU4F3	POU4F3	2	40762593	40763926	1		POU4F3	POU class 4 homeobox 3	POU class 4 homeobox 3 [Source:HGNC Symbol;Acc:HGNC:9220]	PCAdmix_DOG
	ENSCAFG00000006500	TCERG1	TCERG1	2	40856045	40919366	1		TCERG1	transcription elongation regulator 1	transcription elongation regulator 1 [Source:HGNC Symbol;Acc:HGNC:15630]	PCAdmix_DOG
	ENSCAFG00000006511	GPR151	GPR151	2	40923265	40924527	-1		GPR151	G protein-coupled receptor 151	G protein-coupled receptor 151 [Source:HGNC Symbol;Acc:HGNC:23624]	PCAdmix_DOG
	ENSCAFG00000006542	PPP2R2B	PPP2R2B	2	41004434	41447148	-1		PPP2R2B	protein phosphatase 2, regulatory subunit B, beta	protein phosphatase 2 regulatory subunit Bbeta [Source:HGNC Symbol;Acc:HGNC:9305]	PCAdmix_DOG
	ENSCAFG00000006592	STK32A	STK32A	2	41591012	41686182	1		STK32A	serine/threonine kinase 32A	serine/threonine kinase 32A [Source:HGNC Symbol;Acc:HGNC:28317]	PCAdmix_DOG
	ENSCAFG00000006607	DPYSL3	DPYSL3	2	41687675	41750519	-1		DPYSL3	dihydropyrimidinase-like 3	dihydropyrimidinase like 3 [Source:HGNC Symbol;Acc:HGNC:3015]	PCAdmix_DOG
	ENSCAFG00000006945	GPBP1	GPBP1	2	44276227	44318494	1		GPBP1	GC-rich promoter binding protein 1	GC-rich promoter binding protein 1 [Source:HGNC Symbol;Acc:HGNC:29520]	PCAdmix_DOG
	ENSCAFG00000031780			2	52110044	52241905	1					PCAdmix_DOG
	ENSCAFG00000007586	MAST4	MAST4	2	52267267	52633241	1		MAST4	microtubule associated serine/threonine kinase family member 4	microtubule associated serine/threonine kinase family member 4 [Source:HGNC Symbol;Acc:HGNC:19037]	PCAdmix_DOG
	ENSCAFG00000007594	CD180	CD180	2	52646211	52660823	-1		CD180	CD180 molecule	CD180 molecule [Source:HGNC Symbol;Acc:HGNC:6726]	PCAdmix_DOG
	ENSCAFG00000007626	PIK3R1	PIK3R1	2	53456217	53528489	1		PIK3R1	phosphoinositide-3-kinase, regulatory subunit 1 (alpha)	phosphoinositide-3-kinase regulatory subunit 1 [Source:HGNC Symbol;Acc:HGNC:8979]	PCAdmix_DOG
	ENSCAFG00000007670	SLC30A5	SLC30A5	2	54205180	54245851	1		SLC30A5	solute carrier family 30 (zinc transporter), member 5	solute carrier family 30 member 5 [Source:HGNC Symbol;Acc:HGNC:19089]	PCAdmix_DOG
	ENSCAFG00000007705		CCNB1	2	54257083	54264620	1		CCNB1	cyclin B1		PCAdmix_DOG
	ENSCAFG00000007717	CENPH	CENPH	2	54267826	54301431	1				centromere protein H [Source:HGNC Symbol;Acc:HGNC:17268]	PCAdmix_DOG
	ENSCAFG00000007748	CDK7	CDK7	2	54317610	54350461	1		CDK7	cyclin-dependent kinase 7	cyclin dependent kinase 7 [Source:HGNC Symbol;Acc:HGNC:1778]	PCAdmix_DOG
	ENSCAFG00000007757			2	54335930	54336721	-1					PCAdmix_DOG
	ENSCAFG00000007760	CCDC125	CCDC125	2	54353851	54376639	-1				coiled-coil domain containing 125 [Source:HGNC Symbol;Acc:HGNC:28924]	PCAdmix_DOG
	ENSCAFG00000007766	TAF9	TAF9	2	54404047	54404844	-1		TAF9	TAF9 RNA polymerase II, TATA box binding protein (TBP)-associated factor, 32kDa	adenylate kinase isoenzyme 6 [Source:RefSeq peptide;Acc:NP_001273160]	PCAdmix_DOG
	ENSCAFG00000030874			2	54406523	54407566	-1					PCAdmix_DOG
	ENSCAFG00000007771	RAD17	RAD17	2	54407626	54437293	1		RAD17	RAD17 checkpoint clamp loader component	RAD17 checkpoint clamp loader component [Source:HGNC Symbol;Acc:HGNC:9807]	PCAdmix_DOG
	ENSCAFG00000007797	MARVELD2	MARVELD2	2	54441691	54457235	1		MARVELD2	MARVEL domain containing 2	MARVEL domain containing 2 [Source:HGNC Symbol;Acc:HGNC:26401]	PCAdmix_DOG
	ENSCAFG00000007805	OCLN	OCLN	2	54492303	54549098	1		OCLN	occludin	occludin [Source:RefSeq peptide;Acc:NP_001003195]	PCAdmix_DOG
	ENSCAFG00000007808		GTF2H2	2	54556928	54580715	1		GTF2H2	general transcription factor IIH, polypeptide 2, 44kDa		PCAdmix_DOG
	ENSCAFG00000007812		SMN	2	54595447	54637259	-1		SMN	survival motor neuron	survival motor neuron protein [Source:RefSeq peptide;Acc:NP_001003226]	PCAdmix_DOG
	ENSCAFG00000007822	BDP1	BDP1	2	54654481	54743624	1		BDP1	B double prime 1, subunit of RNA polymerase III transcription initiation factor IIIB	B double prime 1, subunit of RNA polymerase III transcription initiation factor IIIB [Source:HGNC Symbol;Acc:HGNC:13652]	PCAdmix_DOG
	ENSCAFG00000007887	MCCC2	MCCC2	2	54751635	54823186	1		MCCC2	methylcrotonoyl-CoA carboxylase 2 (beta)	methylcrotonoyl-CoA carboxylase 2 [Source:HGNC Symbol;Acc:HGNC:6937]	PCAdmix_DOG
	ENSCAFG00000031950	CARTPT	CARTPT	2	54864759	54867412	1		CARTPT	CART prepropeptide	CART prepropeptide [Source:HGNC Symbol;Acc:HGNC:24323]	PCAdmix_DOG
	ENSCAFG00000007950	MAP1B	MAP1B	2	55174106	55258400	1		MAP1B	microtubule-associated protein 1B	microtubule associated protein 1B [Source:HGNC Symbol;Acc:HGNC:6836]	PCAdmix_DOG
	ENSCAFG00000007967	MRPS27	MRPS27	2	55264868	55351688	-1		MRPS27	mitochondrial ribosomal protein S27	mitochondrial ribosomal protein S27 [Source:HGNC Symbol;Acc:HGNC:14512]	PCAdmix_DOG
	ENSCAFG00000007982	PTCD2	PTCD2	2	55351558	55383113	1				pentatricopeptide repeat domain 2 [Source:HGNC Symbol;Acc:HGNC:25734]	PCAdmix_DOG
	ENSCAFG00000007986	ZNF366	ZNF366	2	55455349	55525810	-1				zinc finger protein 366 [Source:HGNC Symbol;Acc:HGNC:18316]	PCAdmix_DOG
	ENSCAFG00000031745			2	55761169	55762304	1					PCAdmix_DOG
	ENSCAFG00000008081	TNPO1	TNPO1	2	55799909	55851213	1		TNPO1	transportin 1	transportin 1 [Source:HGNC Symbol;Acc:HGNC:6401]	PCAdmix_DOG
	ENSCAFG00000008180	FCHO2	FCHO2	2	55905309	56011556	1		FCHO2	FCH domain only 2	FCH domain only 2 [Source:HGNC Symbol;Acc:HGNC:25180]	PCAdmix_DOG
	ENSCAFG00000008212	BTF3	BTF3	2	56341885	56345554	1		BTF3	basic transcription factor 3	transcription factor BTF3 [Source:RefSeq peptide;Acc:NP_001239062]	PCAdmix_DOG
	ENSCAFG00000008224	ANKRA2	ANKRA2	2	56363854	56373920	-1		ANKRA2	ankyrin repeat, family A (RFXANK-like), 2	ankyrin repeat family A member 2 [Source:HGNC Symbol;Acc:HGNC:13208]	PCAdmix_DOG
	ENSCAFG00000008250	UTP15	UTP15	2	56382084	56393729	1		UTP15	UTP15, U3 small nucleolar ribonucleoprotein, homolog (S. cerevisiae)	UTP15, small subunit processome component [Source:HGNC Symbol;Acc:HGNC:25758]	PCAdmix_DOG
	ENSCAFG00000008274	ARHGEF28	ARHGEF28	2	56465040	56701092	1		ARHGEF28	Rho guanine nucleotide exchange factor (GEF) 28	Rho guanine nucleotide exchange factor 28 [Source:HGNC Symbol;Acc:HGNC:30322]	PCAdmix_DOG
	ENSCAFG00000008289	ENC1	ENC1	2	57182480	57184249	-1		ENC1	ectodermal-neural cortex 1 (with BTB domain)	ectodermal-neural cortex 1 [Source:HGNC Symbol;Acc:HGNC:3345]	PCAdmix_DOG
	ENSCAFG00000008384	SLC38A7	SLC38A7	2	58001215	58011356	1		SLC38A7	solute carrier family 38, member 7	solute carrier family 38 member 7 [Source:HGNC Symbol;Acc:HGNC:25582]	PCAdmix_DOG
	ENSCAFG00000008426	CNOT1	CNOT1	2	58063990	58137364	1		CNOT1	CCR4-NOT transcription complex, subunit 1	CCR4-NOT transcription complex subunit 1 [Source:HGNC Symbol;Acc:HGNC:7877]	PCAdmix_DOG
	ENSCAFG00000008461	SETD6	SETD6	2	58135076	58143125	-1		SETD6	SET domain containing 6	SET domain containing 6 [Source:HGNC Symbol;Acc:HGNC:26116]	PCAdmix_DOG
	ENSCAFG00000008483	NDRG4	NDRG4	2	58143245	58166413	-1		NDRG4	NDRG family member 4	NDRG family member 4 [Source:HGNC Symbol;Acc:HGNC:14466]	PCAdmix_DOG
	ENSCAFG00000008495	GINS3	GINS3	2	58233376	58244463	-1		GINS3	GINS complex subunit 3 (Psf3 homolog)	GINS complex subunit 3 [Source:HGNC Symbol;Acc:HGNC:25851]	PCAdmix_DOG
	ENSCAFG00000030756	PRSS54	PRSS54	2	58318981	58334999	1		PRSS54	protease, serine, 54	protease, serine 54 [Source:HGNC Symbol;Acc:HGNC:26336]	PCAdmix_DOG
	ENSCAFG00000008509	CCDC113	CCDC113	2	58329128	58361160	-1		CCDC113	coiled-coil domain containing 113	coiled-coil domain containing 113 [Source:HGNC Symbol;Acc:HGNC:25002]	PCAdmix_DOG
	ENSCAFG00000008544	MMP15	MMP15	2	58504848	58514014	-1				matrix metallopeptidase 15 [Source:HGNC Symbol;Acc:HGNC:7161]	PCAdmix_DOG
	ENSCAFG00000008556	USB1	USB1	2	58535078	58550619	-1				U6 snRNA biogenesis phosphodiesterase 1 [Source:HGNC Symbol;Acc:HGNC:25792]	PCAdmix_DOG
	ENSCAFG00000008559	ZNF319	ZNF319	2	58552762	58554522	1		ZNF319	zinc finger protein 319	zinc finger protein 319 [Source:HGNC Symbol;Acc:HGNC:13644]	PCAdmix_DOG
	ENSCAFG00000031082	TEPP	TEPP	2	58563347	58571494	-1		TEPP	testis, prostate and placenta expressed	testis, prostate and placenta expressed [Source:HGNC Symbol;Acc:HGNC:33745]	PCAdmix_DOG
	ENSCAFG00000008588			2	58602364	58641620	1	Progressive retinal atrophy				PCAdmix_DOG
	ENSCAFG00000008630	KIFC3	KIFC3	2	58700150	58734191	1		KIFC3	kinesin family member C3	kinesin family member C3 [Source:HGNC Symbol;Acc:HGNC:6326]	PCAdmix_DOG
	ENSCAFG00000008657			2	58734873	58753989	-1					PCAdmix_DOG
	ENSCAFG00000008680	DRC7	DRC7	2	58758811	58775466	-1		DRC7	dynein regulatory complex subunit 7	dynein regulatory complex subunit 7 [Source:HGNC Symbol;Acc:HGNC:25289]	PCAdmix_DOG
	ENSCAFG00000008693	ADGRG3	ADGRG3	2	58778315	58802534	-1		ADGRG3	adhesion G protein-coupled receptor G3	adhesion G protein-coupled receptor G3 [Source:HGNC Symbol;Acc:HGNC:13728]	PCAdmix_DOG
	ENSCAFG00000024385	ADGRG1	ADGRG1	2	58804350	58816356	-1				adhesion G protein-coupled receptor G1 [Source:HGNC Symbol;Acc:HGNC:4512]	PCAdmix_DOG
	ENSCAFG00000008706	ADGRG5	ADGRG5	2	58875289	58888989	-1		ADGRG5	adhesion G protein-coupled receptor G5	adhesion G protein-coupled receptor G5 [Source:HGNC Symbol;Acc:HGNC:19010]	PCAdmix_DOG
	ENSCAFG00000008709	CCDC102A	CCDC102A	2	58906887	58922770	1				coiled-coil domain containing 102A [Source:HGNC Symbol;Acc:HGNC:28097]	PCAdmix_DOG
	ENSCAFG00000028599	DOK4	DOK4	2	58946404	58957221	1		DOK4	docking protein 4	docking protein 4 [Source:HGNC Symbol;Acc:HGNC:19868]	PCAdmix_DOG
	ENSCAFG00000008720	POLR2C	POLR2C	2	58954432	58962448	-1		POLR2C	polymerase (RNA) II (DNA directed) polypeptide C, 33kDa	polymerase (RNA) II subunit C [Source:HGNC Symbol;Acc:HGNC:9189]	PCAdmix_DOG
	ENSCAFG00000008731	COQ9	COQ9	2	58964889	58978469	-1		COQ9	coenzyme Q9	coenzyme Q9 [Source:HGNC Symbol;Acc:HGNC:25302]	PCAdmix_DOG
	ENSCAFG00000008740	CIAPIN1	CIAPIN1	2	58982838	58992152	1		CIAPIN1	cytokine induced apoptosis inhibitor 1	cytokine induced apoptosis inhibitor 1 [Source:HGNC Symbol;Acc:HGNC:28050]	PCAdmix_DOG
	ENSCAFG00000008754	CCL17	CCL17	2	59001473	59005737	-1		CCL17	chemokine (C-C motif) ligand 17	C-C motif chemokine 17 [Source:UniProtKB/Swiss-Prot;Acc:Q95N01]	PCAdmix_DOG
	ENSCAFG00000008761	CX3CL1	CX3CL1	2	59022916	59032778	-1				C-X3-C motif chemokine ligand 1 [Source:HGNC Symbol;Acc:HGNC:10647]	PCAdmix_DOG
	ENSCAFG00000032287	CCL22	CCL22	2	59039616	59045465	-1		CCL22	chemokine (C-C motif) ligand 22	C-C motif chemokine ligand 22 [Source:HGNC Symbol;Acc:HGNC:10621]	PCAdmix_DOG
	ENSCAFG00000008782	PLLP	PLLP	2	59101940	59124129	1		PLLP	plasmolipin	plasmolipin [Source:HGNC Symbol;Acc:HGNC:18553]	PCAdmix_DOG
	ENSCAFG00000008785	ARL2BP	ARL2BP	2	59128493	59133765	-1		ARL2BP	ADP-ribosylation factor-like 2 binding protein	ADP ribosylation factor like GTPase 2 binding protein [Source:HGNC Symbol;Acc:HGNC:17146]	PCAdmix_DOG
	ENSCAFG00000008789	RSPRY1	RSPRY1	2	59138554	59187040	-1		RSPRY1	ring finger and SPRY domain containing 1	ring finger and SPRY domain containing 1 [Source:HGNC Symbol;Acc:HGNC:29420]	PCAdmix_DOG
	ENSCAFG00000008772	FAM192A	FAM192A	2	59198173	59219959	1		FAM192A	family with sequence similarity 192, member A	family with sequence similarity 192 member A [Source:HGNC Symbol;Acc:HGNC:29856]	PCAdmix_DOG
	ENSCAFG00000032334			2	59220410	59317492	1					PCAdmix_DOG
	ENSCAFG00000008855	CPNE2	CPNE2	2	59225998	59261889	-1		CPNE2	copine II	copine 2 [Source:HGNC Symbol;Acc:HGNC:2315]	PCAdmix_DOG
	ENSCAFG00000008933	NLRC5	NLRC5	2	59279357	59359909	-1		NLRC5	NLR family, CARD domain containing 5	NLR family CARD domain containing 5 [Source:HGNC Symbol;Acc:HGNC:29933]	PCAdmix_DOG
	ENSCAFG00000009034	SLC12A3	SLC12A3	2	59413884	59449361	-1		SLC12A3	solute carrier family 12 (sodium/chloride transporter), member 3	solute carrier family 12 member 3 [Source:HGNC Symbol;Acc:HGNC:10912]	PCAdmix_DOG
	ENSCAFG00000009088	NUP93	NUP93	2	59465643	59574033	-1		NUP93	nucleoporin 93kDa	nucleoporin 93 [Source:HGNC Symbol;Acc:HGNC:28958]	PCAdmix_DOG
	ENSCAFG00000009113	MT1	MT1	2	59602961	59604676	-1		MT1E	metallothionein 1E	Metallothionein-1 [Source:UniProtKB/Swiss-Prot;Acc:O19000]	PCAdmix_DOG
	ENSCAFG00000023759	MT2A	MT2A	2	59607926	59608825	-1		MT2A	metallothionein 1H	Metallothionein-2 [Source:UniProtKB/Swiss-Prot;Acc:Q9XST5]	PCAdmix_DOG
	ENSCAFG00000028459	MT3	MT3	2	59624978	59626235	-1				metallothionein 3 [Source:HGNC Symbol;Acc:HGNC:7408]	PCAdmix_DOG
	ENSCAFG00000009118	MT4	MT4	2	59640784	59643370	-1		MT4	metallothionein 4	Metallothionein-4 [Source:UniProtKB/Swiss-Prot;Acc:Q9TUI5]	PCAdmix_DOG
	ENSCAFG00000009127	BBS2	BBS2	2	59674834	59706199	1				Bardet-Biedl syndrome 2 [Source:HGNC Symbol;Acc:HGNC:967]	PCAdmix_DOG
	ENSCAFG00000009150	OGFOD1	OGFOD1	2	59711879	59735901	-1		OGFOD1	2-oxoglutarate and iron-dependent oxygenase domain containing 1	2-oxoglutarate and iron dependent oxygenase domain containing 1 [Source:HGNC Symbol;Acc:HGNC:25585]	PCAdmix_DOG
	ENSCAFG00000023283		NUDT21	2	59736311	59751666	1		NUDT21	nudix (nucleoside diphosphate linked moiety X)-type motif 21		PCAdmix_DOG
	ENSCAFG00000009169	AMFR	AMFR	2	59768064	59801856	1		AMFR	autocrine motility factor receptor, E3 ubiquitin protein ligase	autocrine motility factor receptor [Source:HGNC Symbol;Acc:HGNC:463]	PCAdmix_DOG
	ENSCAFG00000009233	GNAO1	GNAO1	2	59807845	59981030	-1		GNAO1	guanine nucleotide binding protein (G protein), alpha activating activity polypeptide O	G protein subunit alpha o1 [Source:HGNC Symbol;Acc:HGNC:4389]	PCAdmix_DOG
	ENSCAFG00000009308			2	60211708	60212115	-1					PCAdmix_DOG
	ENSCAFG00000009316	CES5A	CES5A	2	60236180	60265366	1		CES5A	carboxylesterase 5A	carboxylesterase 5A [Source:HGNC Symbol;Acc:HGNC:26459]	PCAdmix_DOG
	ENSCAFG00000009333	CESdD1	CESdD1	2	60276727	60306083	1		CES1	carboxylesterase 1	carboxylesterase 1 [Source:HGNC Symbol;Acc:HGNC:1863]	PCAdmix_DOG
	ENSCAFG00000009395	slc6A2	slc6A2	2	60315324	60364082	-1	Hyperekplexia (Startle disease)	SLC6A2	solute carrier family 6 (neurotransmitter transporter), member 2	solute carrier family 6 member 2 [Source:HGNC Symbol;Acc:HGNC:11048]	PCAdmix_DOG
	ENSCAFG00000009407	LPCAT2	LPCAT2	2	60398530	60469192	-1		LPCAT2	lysophosphatidylcholine acyltransferase 2	lysophosphatidylcholine acyltransferase 2 [Source:HGNC Symbol;Acc:HGNC:26032]	PCAdmix_DOG
	ENSCAFG00000009421	MMP2	MMP2	2	60470871	60494082	-1		MMP2	matrix metallopeptidase 2	matrix metallopeptidase 2 [Source:HGNC Symbol;Acc:HGNC:7166]	PCAdmix_DOG
	ENSCAFG00000009443	IRX5	IRX5	2	60957233	61024721	-1		IRX5	iroquois homeobox 5	iroquois homeobox 5 [Source:HGNC Symbol;Acc:HGNC:14361]	PCAdmix_DOG
	ENSCAFG00000028882	PLA2G2C	PLA2G2C	2	78687534	78703816	1				phospholipase A2 group IIC [Source:HGNC Symbol;Acc:HGNC:9032]	PCAdmix_DOG
	ENSCAFG00000015097	PLA2G2F	PLA2G2F	2	78716270	78724006	-1		PLA2G2F	phospholipase A2, group IIF	phospholipase A2 group IIF [Source:HGNC Symbol;Acc:HGNC:30040]	PCAdmix_DOG
	ENSCAFG00000015085	PLA2G2D	PLA2G2D	2	78739801	78745571	1				phospholipase A2 group IID [Source:HGNC Symbol;Acc:HGNC:9033]	PCAdmix_DOG
	ENSCAFG00000023246	PLA2G5	PLA2G5	2	78762827	78769656	-1		PLA2G5	phospholipase A2, group V	phospholipase A2 group V [Source:HGNC Symbol;Acc:HGNC:9038]	PCAdmix_DOG
	ENSCAFG00000029530	LRRC7	LRRC7	6	75580515	76004571	-1		LRRC7	leucine rich repeat containing 7	leucine rich repeat containing 7 [Source:HGNC Symbol;Acc:HGNC:18531]	PCAdmix_DOG
	ENSCAFG00000011265	PTPRC	PTPRC	7	4156687	4282147	-1		PTPRC	protein tyrosine phosphatase, receptor type, C	protein tyrosine phosphatase, receptor type C [Source:HGNC Symbol;Acc:HGNC:9666]	PCAdmix_DOG
	ENSCAFG00000011322	ATP6V1G3	ATP6V1G3	7	4368429	4388551	1		ATP6V1G3	ATPase, H+ transporting, lysosomal 13kDa, V1 subunit G3	ATPase H+ transporting V1 subunit G3 [Source:HGNC Symbol;Acc:HGNC:18265]	PCAdmix_DOG
	ENSCAFG00000011330	NEK7	NEK7	7	4560660	4715454	-1		NEK7	NIMA-related kinase 7	NIMA related kinase 7 [Source:HGNC Symbol;Acc:HGNC:13386]	PCAdmix_DOG
	ENSCAFG00000030216		DTD2	8	10694774	10706060	-1		DTD2	D-tyrosyl-tRNA deacylase 2 (putative)		PCAdmix_DOG
	ENSCAFG00000013139	GPR33	GPR33	8	10719010	10720029	-1		GPR33	G protein-coupled receptor 33	G protein-coupled receptor 33 (gene/pseudogene) [Source:HGNC Symbol;Acc:HGNC:4489]	PCAdmix_DOG
	ENSCAFG00000013144	NUBPL	NUBPL	8	10796488	11000734	1		NUBPL	nucleotide binding protein-like	nucleotide binding protein like [Source:HGNC Symbol;Acc:HGNC:20278]	PCAdmix_DOG
	ENSCAFG00000002080	ST6GAL2	ST6GAL2	10	36941370	36971791	1		ST6GAL2	ST6 beta-galactosamide alpha-2,6-sialyltranferase 2	ST6 beta-galactoside alpha-2,6-sialyltransferase 2 [Source:HGNC Symbol;Acc:HGNC:10861]	PCAdmix_DOG
	ENSCAFG00000002096	UXS1	UXS1	10	37342020	37408008	1		UXS1	UDP-glucuronate decarboxylase 1	UDP-glucuronate decarboxylase 1 [Source:HGNC Symbol;Acc:HGNC:17729]	PCAdmix_DOG
	ENSCAFG00000002098	C2orf40	C2orf40	10	37423054	37433119	-1		C10H2orf40	chromosome 10 open reading frame, human C2orf40	chromosome 2 open reading frame 40 [Source:HGNC Symbol;Acc:HGNC:24642]	PCAdmix_DOG
	ENSCAFG00000002099	NCK2	NCK2	10	37582602	37623593	-1		NCK2	NCK adaptor protein 2	NCK adaptor protein 2 [Source:HGNC Symbol;Acc:HGNC:7665]	PCAdmix_DOG
	ENSCAFG00000002105	FHL2	FHL2	10	38043470	38065127	1		FHL2	four and a half LIM domains 2	four and a half LIM domains 2 [Source:HGNC Symbol;Acc:HGNC:3703]	PCAdmix_DOG
	ENSCAFG00000002117	C2orf49	C2orf49	10	38077972	38089823	-1		C10H2orf49	chromosome 10 open reading frame, human C2orf49	chromosome 2 open reading frame 49 [Source:HGNC Symbol;Acc:HGNC:28772]	PCAdmix_DOG
	ENSCAFG00000002112	TGFBRAP1	TGFBRAP1	10	38119347	38158868	1		TGFBRAP1	transforming growth factor, beta receptor associated protein 1	transforming growth factor beta receptor associated protein 1 [Source:HGNC Symbol;Acc:HGNC:16836]	PCAdmix_DOG
	ENSCAFG00000002119	GPR45	GPR45	10	38173418	38174536	-1		GPR45	G protein-coupled receptor 45	G protein-coupled receptor 45 [Source:HGNC Symbol;Acc:HGNC:4503]	PCAdmix_DOG
	ENSCAFG00000002122	MRPS9	MRPS9	10	38306072	38369863	-1		MRPS9	mitochondrial ribosomal protein S9	mitochondrial ribosomal protein S9 [Source:HGNC Symbol;Acc:HGNC:14501]	PCAdmix_DOG
	ENSCAFG00000005307			10	38390565	38391293	1					PCAdmix_DOG
	ENSCAFG00000003463	POU3F3	POU3F3	10	38513890	38590302	-1				POU class 3 homeobox 3 [Source:HGNC Symbol;Acc:HGNC:9216]	PCAdmix_DOG
	ENSCAFG00000032659	TMEM182	TMEM182	10	40224566	40283868	-1		TMEM182	transmembrane protein 182	transmembrane protein 182 [Source:HGNC Symbol;Acc:HGNC:26391]	PCAdmix_DOG
	ENSCAFG00000023596	MFSD9	MFSD9	10	40314686	40328087	1		MFSD9	major facilitator superfamily domain containing 9	major facilitator superfamily domain containing 9 [Source:HGNC Symbol;Acc:HGNC:28158]	PCAdmix_DOG
	ENSCAFG00000002130	SLC9A2	SLC9A2	10	40338284	40560356	-1		SLC9A2	solute carrier family 9, subfamily A (NHE2, cation proton antiporter 2), member 2	solute carrier family 9 member A2 [Source:HGNC Symbol;Acc:HGNC:11072]	PCAdmix_DOG
	ENSCAFG00000029466			10	40491556	40505887	-1					PCAdmix_DOG
	ENSCAFG00000002152	IL1R2	IL1R2	10	40965454	41003665	-1		IL1R2	interleukin 1 receptor, type II	interleukin 1 receptor type 2 [Source:HGNC Symbol;Acc:HGNC:5994]	PCAdmix_DOG
	ENSCAFG00000002162	MAP4K4	MAP4K4	10	41089604	41276950	-1		MAP4K4	mitogen-activated protein kinase kinase kinase kinase 4	mitogen-activated protein kinase kinase kinase kinase 4 [Source:HGNC Symbol;Acc:HGNC:6866]	PCAdmix_DOG
	ENSCAFG00000002190	RFX8	RFX8	10	41464883	41521898	1		RFX8	RFX family member 8, lacking RFX DNA binding domain	DNA-binding protein RFX8 [Source:RefSeq peptide;Acc:NP_001257816]	PCAdmix_DOG
	ENSCAFG00000030703	UBE2N	UBE2N	10	41470073	41470740	-1		UBE2N	ubiquitin-conjugating enzyme E2N	ubiquitin-conjugating enzyme E2 N [Source:RefSeq peptide;Acc:NP_001239060]	PCAdmix_DOG
	ENSCAFG00000030846	CREG2	CREG2	10	41540806	41571688	1		CREG2	cellular repressor of E1A-stimulated genes 2	cellular repressor of E1A stimulated genes 2 [Source:HGNC Symbol;Acc:HGNC:14272]	PCAdmix_DOG
	ENSCAFG00000002193		RNF149	10	41633790	41647066	1		RNF149	ring finger protein 149		PCAdmix_DOG
	ENSCAFG00000002199	CNOT11	CNOT11	10	41653820	41667945	-1		CNOT11	CCR4-NOT transcription complex, subunit 11	CCR4-NOT transcription complex subunit 11 [Source:HGNC Symbol;Acc:HGNC:25217]	PCAdmix_DOG
	ENSCAFG00000002206	TBC1D8	TBC1D8	10	41718990	41831315	1		TBC1D8	TBC1 domain family, member 8 (with GRAM domain)	TBC1 domain family member 8 [Source:HGNC Symbol;Acc:HGNC:17791]	PCAdmix_DOG
	ENSCAFG00000002215	RPL31	RPL31	10	41832854	41842211	-1		RPL31	ribosomal protein L31		PCAdmix_DOG
	ENSCAFG00000002223	NPAS2	NPAS2	10	41847885	41998014	-1		NPAS2	neuronal PAS domain protein 2	neuronal PAS domain protein 2 [Source:HGNC Symbol;Acc:HGNC:7895]	PCAdmix_DOG
	ENSCAFG00000002226	PDCL3	PDCL3	10	42215231	42223849	-1		PDCL3	phosducin-like 3	phosducin like 3 [Source:HGNC Symbol;Acc:HGNC:28860]	PCAdmix_DOG
	ENSCAFG00000023251	NMS	NMS	10	42260485	42271437	-1				neuromedin S [Source:HGNC Symbol;Acc:HGNC:32203]	PCAdmix_DOG
	ENSCAFG00000002235	CHST10	CHST10	10	42311067	42339732	1		CHST10	carbohydrate sulfotransferase 10	carbohydrate sulfotransferase 10 [Source:HGNC Symbol;Acc:HGNC:19650]	PCAdmix_DOG
	ENSCAFG00000002239	LONRF2	LONRF2	10	42377622	42429376	1		LONRF2	LON peptidase N-terminal domain and ring finger 2	LON peptidase N-terminal domain and ring finger 2 [Source:HGNC Symbol;Acc:HGNC:24788]	PCAdmix_DOG
	ENSCAFG00000023079	AFF3	AFF3	10	42586618	43111084	1		AFF3	AF4/FMR2 family, member 3	AF4/FMR2 family member 3 [Source:HGNC Symbol;Acc:HGNC:6473]	PCAdmix_DOG
	ENSCAFG00000002260	REV1	REV1	10	43150829	43249028	1		REV1	REV1, polymerase (DNA directed)	REV1, DNA directed polymerase [Source:HGNC Symbol;Acc:HGNC:14060]	PCAdmix_DOG
	ENSCAFG00000002319	KIAA1211L	KIAA1211L	10	43806996	43887377	1		KIAA1211L	KIAA1211-like ortholog	KIAA1211 like [Source:HGNC Symbol;Acc:HGNC:33454]	PCAdmix_DOG
	ENSCAFG00000002323	MGAT4A	MGAT4A	10	43931061	44071307	1		MGAT4A	mannosyl (alpha-1,3-)-glycoprotein beta-1,4-N-acetylglucosaminyltransferase, isozyme A	mannosyl (alpha-1,3-)-glycoprotein beta-1,4-N-acetylglucosaminyltransferase, isozyme A [Source:HGNC Symbol;Acc:HGNC:7047]	PCAdmix_DOG
	ENSCAFG00000002344	INPP4A	INPP4A	10	44057787	44163609	-1		INPP4A	inositol polyphosphate-4-phosphatase type I A	inositol polyphosphate-4-phosphatase type I A [Source:HGNC Symbol;Acc:HGNC:6074]	PCAdmix_DOG
	ENSCAFG00000002329	COA5	COA5	10	44073262	44079853	1				cytochrome c oxidase assembly factor 5 [Source:HGNC Symbol;Acc:HGNC:33848]	PCAdmix_DOG
	ENSCAFG00000002358	VWA3B	VWA3B	10	44290590	44508139	-1		VWA3B	von Willebrand factor A domain containing 3B	von Willebrand factor A domain containing 3B [Source:HGNC Symbol;Acc:HGNC:28385]	PCAdmix_DOG
	ENSCAFG00000002365	TMEM131	TMEM131	10	44600833	44825972	1		TMEM131	transmembrane protein 131	transmembrane protein 131 [Source:HGNC Symbol;Acc:HGNC:30366]	PCAdmix_DOG
	ENSCAFG00000002371	ZAP70	ZAP70	10	44887358	44899014	-1				zeta chain of T cell receptor associated protein kinase 70kDa [Source:HGNC Symbol;Acc:HGNC:12858]	PCAdmix_DOG
	ENSCAFG00000002380	ACTR1B	ACTR1B	10	44964979	44972667	1		ACTR1B	ARP1 actin-related protein 1 homolog B, centractin beta (yeast)	ARP1 actin-related protein 1 homolog B, centractin beta [Source:HGNC Symbol;Acc:HGNC:168]	PCAdmix_DOG
	ENSCAFG00000002387	cox5b	cox5b	10	44979740	44985971	-1		COX5B	cytochrome c oxidase polypeptide Vb	cytochrome c oxidase subunit 5B [Source:HGNC Symbol;Acc:HGNC:2269]	PCAdmix_DOG
	ENSCAFG00000002390	FAM178B	FAM178B	10	45002651	45102784	1				family with sequence similarity 178 member B [Source:HGNC Symbol;Acc:HGNC:28036]	PCAdmix_DOG
	ENSCAFG00000002393	SEMA4C	SEMA4C	10	45108921	45116855	1		SEMA4C	sema domain, immunoglobulin domain (Ig), transmembrane domain (TM) and short cytoplasmic domain, (semaphorin) 4C	semaphorin 4C [Source:HGNC Symbol;Acc:HGNC:10731]	PCAdmix_DOG
	ENSCAFG00000002396	ANKRD39	ANKRD39	10	45117765	45130155	1		ANKRD39	ankyrin repeat domain 39	ankyrin repeat domain 39 [Source:HGNC Symbol;Acc:HGNC:28640]	PCAdmix_DOG
	ENSCAFG00000023414	CNNM3	CNNM3	10	45138538	45154744	-1				cyclin and CBS domain divalent metal cation transport mediator 3 [Source:HGNC Symbol;Acc:HGNC:104]	PCAdmix_DOG
	ENSCAFG00000002404	CNNM4	CNNM4	10	45159856	45197417	-1		CNNM4	cyclin and CBS domain divalent metal cation transport mediator 4	cyclin and CBS domain divalent metal cation transport mediator 4 [Source:HGNC Symbol;Acc:HGNC:105]	PCAdmix_DOG
	ENSCAFG00000002406	LMAN2L	LMAN2L	10	45215787	45244649	1		LMAN2L	lectin, mannose-binding 2-like	lectin, mannose binding 2 like [Source:HGNC Symbol;Acc:HGNC:19263]	PCAdmix_DOG
	ENSCAFG00000002411	FER1L5	FER1L5	10	45247164	45305373	-1		FER1L5	fer-1-like family member 5	fer-1 like family member 5 [Source:HGNC Symbol;Acc:HGNC:19044]	PCAdmix_DOG
	ENSCAFG00000002425	KANSL3	KANSL3	10	45315640	45361150	1		KANSL3	KAT8 regulatory NSL complex subunit 3	KAT8 regulatory NSL complex subunit 3 [Source:HGNC Symbol;Acc:HGNC:25473]	PCAdmix_DOG
	ENSCAFG00000002433	OXER1	OXER1	10	45363188	45365474	-1		OXER1	oxoeicosanoid (OXE) receptor 1	oxoeicosanoid receptor 1 [Source:HGNC Symbol;Acc:HGNC:24884]	PCAdmix_DOG
	ENSCAFG00000002435	HAAO	HAAO	10	45368415	45380249	-1				3-hydroxyanthranilate 3,4-dioxygenase [Source:HGNC Symbol;Acc:HGNC:4796]	PCAdmix_DOG
	ENSCAFG00000031079	ZFP36L2	ZFP36L2	10	45745978	45750954	-1		ZFP36L2	ZFP36 ring finger protein-like 2	ZFP36 ring finger protein-like 2 [Source:HGNC Symbol;Acc:HGNC:1108]	PCAdmix_DOG
	ENSCAFG00000002463	THADA	THADA	10	45756009	46082431	-1		THADA	thyroid adenoma associated	Thyroid adenoma-associated protein homolog [Source:UniProtKB/Swiss-Prot;Acc:A8C750]	PCAdmix_DOG
	ENSCAFG00000002489	PLEKHH2	PLEKHH2	10	46113651	46226405	1		PLEKHH2	pleckstrin homology domain containing, family H (with MyTH4 domain) member 2	pleckstrin homology, MyTH4 and FERM domain containing H2 [Source:HGNC Symbol;Acc:HGNC:30506]	PCAdmix_DOG
	ENSCAFG00000002499	DYNC2LI1	DYNC2LI1	10	46231038	46269919	1		DYNC2LI1	dynein, cytoplasmic 2, light intermediate chain 1	dynein cytoplasmic 2 light intermediate chain 1 [Source:HGNC Symbol;Acc:HGNC:24595]	PCAdmix_DOG
	ENSCAFG00000002504	ABCG5	ABCG5	10	46272962	46299773	-1		ABCG5	ATP-binding cassette, sub-family G (WHITE), member 5	ATP binding cassette subfamily G member 5 [Source:HGNC Symbol;Acc:HGNC:13886]	PCAdmix_DOG
	ENSCAFG00000002518	ABCG8	ABCG8	10	46299559	46319695	1		ABCG8	ATP-binding cassette, sub-family G (WHITE), member 8	ATP binding cassette subfamily G member 8 [Source:HGNC Symbol;Acc:HGNC:13887]	PCAdmix_DOG
	ENSCAFG00000002527	LRPPRC	LRPPRC	10	46325244	46438559	-1		LRPPRC	leucine-rich pentatricopeptide repeat containing	leucine rich pentatricopeptide repeat containing [Source:HGNC Symbol;Acc:HGNC:15714]	PCAdmix_DOG
	ENSCAFG00000032295			10	46541398	46541835	1					PCAdmix_DOG
	ENSCAFG00000002535	PPM1B	PPM1B	10	46590015	46664245	1		PPM1B	protein phosphatase, Mg2+/Mn2+ dependent, 1B	protein phosphatase, Mg2+/Mn2+ dependent 1B [Source:HGNC Symbol;Acc:HGNC:9276]	PCAdmix_DOG
	ENSCAFG00000002538	SLC3A1	SLC3A1	10	46700522	46735787	1	Cystinuria type I - A	SLC3A1	solute carrier family 3 (amino acid transporter heavy chain), member 1	solute carrier family 3 member 1 [Source:HGNC Symbol;Acc:HGNC:11025]	PCAdmix_DOG
	ENSCAFG00000002543	PREPL	PREPL	10	46736313	46790692	-1		PREPL	prolyl endopeptidase-like	prolyl endopeptidase-like [Source:HGNC Symbol;Acc:HGNC:30228]	PCAdmix_DOG
	ENSCAFG00000002546	CAMKMT	CAMKMT	10	46792936	47185991	1		CAMKMT	calmodulin-lysine N-methyltransferase	calmodulin-lysine N-methyltransferase [Source:HGNC Symbol;Acc:HGNC:26276]	PCAdmix_DOG
	ENSCAFG00000002547	SIX3	SIX3	10	47340619	47343536	1				SIX homeobox 3 [Source:HGNC Symbol;Acc:HGNC:10889]	PCAdmix_DOG
	ENSCAFG00000002550	SIX2	SIX2	10	47399124	47403507	-1		SIX2	SIX homeobox 2	SIX homeobox 2 [Source:HGNC Symbol;Acc:HGNC:10888]	PCAdmix_DOG
	ENSCAFG00000002554	SRBD1	SRBD1	10	47742907	47939042	-1		SRBD1	S1 RNA binding domain 1	S1 RNA binding domain 1 [Source:HGNC Symbol;Acc:HGNC:25521]	PCAdmix_DOG
	ENSCAFG00000002610	PRKCE	PRKCE	10	47976769	48465314	1		PRKCE	protein kinase C, epsilon	protein kinase C epsilon [Source:HGNC Symbol;Acc:HGNC:9401]	PCAdmix_DOG
	ENSCAFG00000002627	EPAS1	EPAS1	10	48551410	48634643	1		EPAS1	endothelial PAS domain protein 1	endothelial PAS domain protein 1 [Source:HGNC Symbol;Acc:HGNC:3374]	PCAdmix_DOG
	ENSCAFG00000002629	TMEM247	TMEM247	10	48713470	48719897	1		TMEM247	transmembrane protein 247	transmembrane protein 247 [Source:HGNC Symbol;Acc:HGNC:42967]	PCAdmix_DOG
	ENSCAFG00000002630	ATP6V1E2	ATP6V1E2	10	48746514	48747194	-1		ATP6V1E2	ATPase, H+ transporting, lysosomal 31kDa, V1 subunit E2	ATPase H+ transporting V1 subunit E2 [Source:HGNC Symbol;Acc:HGNC:18125]	PCAdmix_DOG
	ENSCAFG00000002631	RHOQ	RHOQ	10	48767787	48804020	1				ras homolog family member Q [Source:HGNC Symbol;Acc:HGNC:17736]	PCAdmix_DOG
	ENSCAFG00000002632	PIGF	PIGF	10	48804434	48838295	-1		PIGF	phosphatidylinositol glycan anchor biosynthesis, class F	phosphatidylinositol glycan anchor biosynthesis class F [Source:HGNC Symbol;Acc:HGNC:8962]	PCAdmix_DOG
	ENSCAFG00000002633	CRIPT	CRIPT	10	48840353	48850750	1		CRIPT	cysteine-rich PDZ-binding protein	CXXC repeat containing interactor of PDZ3 domain [Source:HGNC Symbol;Acc:HGNC:14312]	PCAdmix_DOG
	ENSCAFG00000002634	SOCS5	SOCS5	10	48972842	48974452	1		SOCS5	suppressor of cytokine signaling 5	suppressor of cytokine signaling 5 [Source:HGNC Symbol;Acc:HGNC:16852]	PCAdmix_DOG
	ENSCAFG00000032480	MCFD2	MCFD2	10	49091338	49096780	-1		MCFD2	multiple coagulation factor deficiency 2	multiple coagulation factor deficiency 2 [Source:HGNC Symbol;Acc:HGNC:18451]	PCAdmix_DOG
	ENSCAFG00000002641	TTC7A	TTC7A	10	49139476	49246724	1		TTC7A	tetratricopeptide repeat domain 7A	tetratricopeptide repeat domain 7A [Source:HGNC Symbol;Acc:HGNC:19750]	PCAdmix_DOG
	ENSCAFG00000002643			10	49279211	49292748	-1					PCAdmix_DOG
	ENSCAFG00000002646			10	49301063	49308186	-1					PCAdmix_DOG
	ENSCAFG00000002653	EPCAM	EPCAM	10	49485748	49500260	1				epithelial cell adhesion molecule [Source:HGNC Symbol;Acc:HGNC:11529]	PCAdmix_DOG
	ENSCAFG00000002659	MSH2	MSH2	10	49517369	49594319	1		MSH2	mutS homolog 2	mutS homolog 2 [Source:HGNC Symbol;Acc:HGNC:7325]	PCAdmix_DOG
	ENSCAFG00000029692	KCNK12	KCNK12	10	49618329	49671387	-1		KCNK12	potassium channel, two pore domain subfamily K, member 12	potassium two pore domain channel subfamily K member 12 [Source:HGNC Symbol;Acc:HGNC:6274]	PCAdmix_DOG
	ENSCAFG00000032122		RPL39	10	49680974	49681126	-1		RPL39	ribosomal protein L39		PCAdmix_DOG
	ENSCAFG00000002664	MSH6	MSH6	10	49820671	49837941	1		MSH6	mutS homolog 6	mutS homolog 6 [Source:HGNC Symbol;Acc:HGNC:7329]	PCAdmix_DOG
	ENSCAFG00000002669	FBXO11	FBXO11	10	49839202	49954200	-1		FBXO11	F-box protein 11	F-box protein 11 [Source:HGNC Symbol;Acc:HGNC:13590]	PCAdmix_DOG
	ENSCAFG00000029603	FOXN2	FOXN2	10	50259940	50292485	1		FOXN2	forkhead box N2	forkhead box N2 [Source:HGNC Symbol;Acc:HGNC:5281]	PCAdmix_DOG
	ENSCAFG00000030244			10	50340102	50340440	1					PCAdmix_DOG
	ENSCAFG00000002688	PPP1R21	PPP1R21	10	50350595	50416896	1		PPP1R21	protein phosphatase 1, regulatory subunit 21	protein phosphatase 1 regulatory subunit 21 [Source:HGNC Symbol;Acc:HGNC:30595]	PCAdmix_DOG
	ENSCAFG00000002692	GTF2A1L	GTF2A1L	10	50454985	50544377	1		STON1	stonin 1		PCAdmix_DOG
	ENSCAFG00000002693			10	50481409	50482707	-1					PCAdmix_DOG
	ENSCAFG00000002695		LHCGR	10	50541960	50598504	-1		LHCGR	luteinizing hormone/choriogonadotropin receptor		PCAdmix_DOG
	ENSCAFG00000002698	FSHR	FSHR	10	50770995	50938464	-1		FSHR	follicle stimulating hormone receptor	follicle stimulating hormone receptor [Source:HGNC Symbol;Acc:HGNC:3969]	PCAdmix_DOG
	ENSCAFG00000030961		NRXN1	10	51555402	51981172	-1		NRXN1	neurexin 1		PCAdmix_DOG
	ENSCAFG00000002712			10	52099287	52258207	-1					PCAdmix_DOG
	ENSCAFG00000002716			10	52564734	52667569	-1					PCAdmix_DOG
	ENSCAFG00000029777			10	54172638	54174340	1					PCAdmix_DOG
	ENSCAFG00000002722	CHAC2	CHAC2	10	54672303	54799033	1				ChaC cation transport regulator homolog 2 [Source:HGNC Symbol;Acc:HGNC:32363]	PCAdmix_DOG
	ENSCAFG00000002721		ASB3	10	54712747	54867947	-1		ASB3	ankyrin repeat and SOCS box containing 3	ankyrin repeat and SOCS box protein 3 [Source:RefSeq peptide;Acc:NP_001191984]	PCAdmix_DOG
	ENSCAFG00000002724	ERLEC1	ERLEC1	10	54815350	54844950	1				endoplasmic reticulum lectin 1 [Source:HGNC Symbol;Acc:HGNC:25222]	PCAdmix_DOG
	ENSCAFG00000002729	PSME4	PSME4	10	54873030	54960026	-1		PSME4	proteasome activator subunit 4	proteasome activator subunit 4 [Source:HGNC Symbol;Acc:HGNC:20635]	PCAdmix_DOG
	ENSCAFG00000029566			10	54986137	54986552	1					PCAdmix_DOG
	ENSCAFG00000023070	ACYP2	ACYP2	10	55082603	55226608	1		ACYP2	acylphosphatase 2, muscle type	acylphosphatase 2 [Source:HGNC Symbol;Acc:HGNC:180]	PCAdmix_DOG
	ENSCAFG00000002744	SPTBN1	SPTBN1	10	55429989	55573257	1		SPTBN1	spectrin, beta, non-erythrocytic 1	spectrin beta, non-erythrocytic 1 [Source:HGNC Symbol;Acc:HGNC:11275]	PCAdmix_DOG
	ENSCAFG00000029118			10	55575631	55576650	-1					PCAdmix_DOG
	ENSCAFG00000002762	EML6	EML6	10	55612473	55881771	1		EML6	echinoderm microtubule associated protein like 6	echinoderm microtubule associated protein like 6 [Source:HGNC Symbol;Acc:HGNC:35412]	PCAdmix_DOG
	ENSCAFG00000002771	RTN4	RTN4	10	55885419	55955031	-1		RTN4	reticulon 4	reticulon 4 [Source:HGNC Symbol;Acc:HGNC:14085]	PCAdmix_DOG
	ENSCAFG00000002819	CLHC1	CLHC1	10	56100899	56126462	-1		CLHC1	clathrin heavy chain linker domain containing 1	clathrin heavy chain linker domain containing 1 [Source:HGNC Symbol;Acc:HGNC:26453]	PCAdmix_DOG
	ENSCAFG00000023471	RPS27A	RPS27A	10	56132924	56135327	1		RPS27A	ribosomal protein S27a		PCAdmix_DOG
	ENSCAFG00000002829	MTIF2	MTIF2	10	56133651	56157562	-1		MTIF2	mitochondrial translational initiation factor 2	mitochondrial translational initiation factor 2 [Source:HGNC Symbol;Acc:HGNC:7441]	PCAdmix_DOG
	ENSCAFG00000002833		LOC100856725	10	56164433	56165788	1		LOC100856725	prolyl-tRNA synthetase associated domain-containing protein 1		PCAdmix_DOG
	ENSCAFG00000002796	CCDC88A	CCDC88A	10	56171445	56300908	-1		CCDC88A	coiled-coil domain containing 88A	coiled-coil domain containing 88A [Source:HGNC Symbol;Acc:HGNC:25523]	PCAdmix_DOG
	ENSCAFG00000002838	CFAP36	CFAP36	10	56374145	56403051	1		CFAP36	cilia and flagella associated protein 36	cilia and flagella associated protein 36 [Source:HGNC Symbol;Acc:HGNC:30540]	PCAdmix_DOG
	ENSCAFG00000002860	PPP4R3B	PPP4R3B	10	56406747	56467756	-1		PPP4R3B	protein phosphatase 4, regulatory subunit 3B	protein phosphatase 4 regulatory subunit 3B [Source:HGNC Symbol;Acc:HGNC:29267]	PCAdmix_DOG
	ENSCAFG00000002891	PNPT1	PNPT1	10	56478898	56520967	-1				polyribonucleotide nucleotidyltransferase 1 [Source:HGNC Symbol;Acc:HGNC:23166]	PCAdmix_DOG
	ENSCAFG00000002919	EFEMP1	EFEMP1	10	56632531	56694505	-1		EFEMP1	EGF containing fibulin-like extracellular matrix protein 1	EGF containing fibulin like extracellular matrix protein 1 [Source:HGNC Symbol;Acc:HGNC:3218]	PCAdmix_DOG
	ENSCAFG00000002927	CCDC85A	CCDC85A	10	56936439	57122395	1				coiled-coil domain containing 85A [Source:HGNC Symbol;Acc:HGNC:29400]	PCAdmix_DOG
	ENSCAFG00000002935	VRK2	VRK2	10	58432010	58544166	1		VRK2	vaccinia related kinase 2	vaccinia related kinase 2 [Source:HGNC Symbol;Acc:HGNC:12719]	PCAdmix_DOG
	ENSCAFG00000002940	FANCL	FANCL	10	58540591	58632360	-1				Fanconi anemia complementation group L [Source:HGNC Symbol;Acc:HGNC:20748]	PCAdmix_DOG
	ENSCAFG00000002955	BCL11A	BCL11A	10	60588917	60689694	-1		BCL11A	B-cell CLL/lymphoma 11A (zinc finger protein)	B-cell CLL/lymphoma 11A [Source:HGNC Symbol;Acc:HGNC:13221]	PCAdmix_DOG
	ENSCAFG00000002975		PAPOLG	10	60879126	60911162	1		PAPOLG	poly(A) polymerase gamma		PCAdmix_DOG
	ENSCAFG00000002981	REL	REL	10	60990207	61023654	1		REL	v-rel avian reticuloendotheliosis viral oncogene homolog	REL proto-oncogene, NF-kB subunit [Source:HGNC Symbol;Acc:HGNC:9954]	PCAdmix_DOG
	ENSCAFG00000002986	PUS10	PUS10	10	61033634	61100479	-1		PUS10	pseudouridylate synthase 10	pseudouridylate synthase 10 [Source:HGNC Symbol;Acc:HGNC:26505]	PCAdmix_DOG
	ENSCAFG00000030289			10	61222972	61232384	1					PCAdmix_DOG
	ENSCAFG00000003007	USP34	USP34	10	61267506	61472048	-1		USP34	ubiquitin specific peptidase 34	ubiquitin specific peptidase 34 [Source:HGNC Symbol;Acc:HGNC:20066]	PCAdmix_DOG
	ENSCAFG00000003050	XPO1	XPO1	10	61539089	61588318	-1		XPO1	exportin 1	exportin 1 [Source:HGNC Symbol;Acc:HGNC:12825]	PCAdmix_DOG
	ENSCAFG00000003079	FAM161A	FAM161A	10	61818785	61840556	-1	Progressive retinal atrophy type 3 Tibetan Spaniel and Tibetan Terrier			family with sequence similarity 161 member A [Source:HGNC Symbol;Acc:HGNC:25808]	PCAdmix_DOG
	ENSCAFG00000003083	CCT4	CCT4	10	61857581	61873913	-1		CCT4	chaperonin containing TCP1, subunit 4 (delta)	chaperonin containing TCP1 subunit 4 [Source:HGNC Symbol;Acc:HGNC:1617]	PCAdmix_DOG
	ENSCAFG00000003090	COMMD1	COMMD1	10	61880797	62060532	1	Wilson disease	COMMD1	copper metabolism (Murr1) domain containing 1	copper metabolism domain containing 1 [Source:HGNC Symbol;Acc:HGNC:23024]	PCAdmix_DOG
	ENSCAFG00000003094	B3GNT2	B3GNT2	10	62145117	62146310	1		B3GNT2	UDP-GlcNAc:betaGal beta-1,3-N-acetylglucosaminyltransferase 2	UDP-GlcNAc:betaGal beta-1,3-N-acetylglucosaminyltransferase 2 [Source:HGNC Symbol;Acc:HGNC:15629]	PCAdmix_DOG
	ENSCAFG00000003110	TMEM17	TMEM17	10	62355795	62361788	-1		TMEM17	transmembrane protein 17	transmembrane protein 17 [Source:HGNC Symbol;Acc:HGNC:26623]	PCAdmix_DOG
	ENSCAFG00000003106	EHBP1	EHBP1	10	62512559	62827674	1		EHBP1	EH domain binding protein 1	EH domain binding protein 1 [Source:HGNC Symbol;Acc:HGNC:29144]	PCAdmix_DOG
	ENSCAFG00000003119	WDPCP	WDPCP	10	62877402	63214180	-1		WDPCP	WD repeat containing planar cell polarity effector	WD repeat containing planar cell polarity effector [Source:HGNC Symbol;Acc:HGNC:28027]	PCAdmix_DOG
	ENSCAFG00000003129	MDH1	MDH1	10	63322248	63334761	1		MDH1	malate dehydrogenase 1, NAD (soluble)	malate dehydrogenase 1 [Source:HGNC Symbol;Acc:HGNC:6970]	PCAdmix_DOG
	ENSCAFG00000003137	UGP2	UGP2	10	63549529	63598140	1		UGP2	UDP-glucose pyrophosphorylase 2	UDP-glucose pyrophosphorylase 2 [Source:HGNC Symbol;Acc:HGNC:12527]	PCAdmix_DOG
	ENSCAFG00000003153	VPS54	VPS54	10	63599673	63654878	-1		VPS54	vacuolar protein sorting 54 homolog (S. cerevisiae)	VPS54, GARP complex subunit [Source:HGNC Symbol;Acc:HGNC:18652]	PCAdmix_DOG
	ENSCAFG00000003162	PELI1	PELI1	10	63729763	63743303	-1		PELI1	pellino E3 ubiquitin protein ligase 1	pellino E3 ubiquitin protein ligase 1 [Source:HGNC Symbol;Acc:HGNC:8827]	PCAdmix_DOG
	ENSCAFG00000003175	AFTPH	AFTPH	10	64104448	64172173	1		AFTPH	aftiphilin	aftiphilin [Source:HGNC Symbol;Acc:HGNC:25951]	PCAdmix_DOG
	ENSCAFG00000023129			10	64206456	64385838	-1					PCAdmix_DOG
	ENSCAFG00000003180	SLC1A4	SLC1A4	10	64482509	64508336	1		SLC1A4	solute carrier family 1 (glutamate/neutral amino acid transporter), member 4	solute carrier family 1 member 4 [Source:HGNC Symbol;Acc:HGNC:10942]	PCAdmix_DOG
	ENSCAFG00000003184	CEP68	CEP68	10	64548429	64559579	1		CEP68	centrosomal protein 68kDa	centrosomal protein 68 [Source:HGNC Symbol;Acc:HGNC:29076]	PCAdmix_DOG
	ENSCAFG00000003187	RAB1A	RAB1A	10	64564351	64590654	-1		RAB1A	RAB1A, member RAS oncogene family	Ras-related protein Rab-1A [Source:UniProtKB/Swiss-Prot;Acc:P62822]	PCAdmix_DOG
	ENSCAFG00000030955			10	64592193	64592969	1					PCAdmix_DOG
	ENSCAFG00000003197	ACTR2	ACTR2	10	64696186	64730512	1		ACTR2	ARP2 actin-related protein 2 homolog (yeast)	ARP2 actin-related protein 2 homolog (yeast) [Source:HGNC Symbol;Acc:HGNC:169]	PCAdmix_DOG
	ENSCAFG00000003219	SPRED2	SPRED2	10	64764500	64815953	-1		SPRED2	sprouty-related, EVH1 domain containing 2	sprouty related EVH1 domain containing 2 [Source:HGNC Symbol;Acc:HGNC:17722]	PCAdmix_DOG
	ENSCAFG00000003229			10	64926188	64926870	-1					PCAdmix_DOG
	ENSCAFG00000003233	MEIS1	MEIS1	10	65764726	65897086	1		MEIS1	Meis homeobox 1	Meis homeobox 1 [Source:HGNC Symbol;Acc:HGNC:7000]	PCAdmix_DOG
	ENSCAFG00000030635			10	66125085	66126038	-1					PCAdmix_DOG
	ENSCAFG00000003239	ETAA1	ETAA1	10	66631544	66646888	1		ETAA1	Ewing tumor-associated antigen 1	Ewing tumor associated antigen 1 [Source:HGNC Symbol;Acc:HGNC:24648]	PCAdmix_DOG
	ENSCAFG00000002494	GALNT12	GALNT12	11	55909252	55948017	1		GALNT12	polypeptide N-acetylgalactosaminyltransferase 12	polypeptide N-acetylgalactosaminyltransferase 12 [Source:HGNC Symbol;Acc:HGNC:19877]	PCAdmix_DOG
	ENSCAFG00000002525	COL15A1	COL15A1	11	56026370	56133494	1		COL15A1	collagen, type XV, alpha 1	collagen type XV alpha 1 chain [Source:HGNC Symbol;Acc:HGNC:2192]	PCAdmix_DOG
	ENSCAFG00000002528	TGFBR1	TGFBR1	11	56192030	56223557	1		TGFBR1	transforming growth factor, beta receptor 1	transforming growth factor beta receptor 1 [Source:HGNC Symbol;Acc:HGNC:11772]	PCAdmix_DOG
	ENSCAFG00000002532	ALG2	ALG2	11	56273715	56279412	-1		ALG2	ALG2, alpha-1,3/1,6-mannosyltransferase	ALG2, alpha-1,3/1,6-mannosyltransferase [Source:HGNC Symbol;Acc:HGNC:23159]	PCAdmix_DOG
	ENSCAFG00000002533	SEC61B	SEC61B	11	56279788	56286294	1		SEC61B	Sec61 translocon beta subunit	Protein transport protein Sec61 subunit beta [Source:UniProtKB/Swiss-Prot;Acc:P60467]	PCAdmix_DOG
	ENSCAFG00000002539	STX17	STX17	11	56885896	56945544	1		STX17	syntaxin 17	syntaxin 17 [Source:HGNC Symbol;Acc:HGNC:11432]	PCAdmix_DOG
	ENSCAFG00000002542			11	56959023	57039883	-1					PCAdmix_DOG
	ENSCAFG00000002552	INVS	INVS	11	57043281	57195281	1		INVS	inversin	Inversin [Source:UniProtKB/Swiss-Prot;Acc:Q6JAN1]	PCAdmix_DOG
	ENSCAFG00000002565	TEX10	TEX10	11	57196791	57255838	-1		TEX10	testis expressed 10	testis expressed 10 [Source:HGNC Symbol;Acc:HGNC:25988]	PCAdmix_DOG
	ENSCAFG00000002577		LOC612942	11	57343357	57452013	1		LOC612942	myb/SANT-like DNA-binding domain-containing protein 3		PCAdmix_DOG
	ENSCAFG00000002586	PLPPR1	PLPPR1	11	57807036	58074298	1		LPPR1	lipid phosphate phosphatase-related protein type 1	phospholipid phosphatase related 1 [Source:HGNC Symbol;Acc:HGNC:25993]	PCAdmix_DOG
	ENSCAFG00000002590		BAAT	11	58085495	58090683	-1		BAAT	bile acid CoA:amino acid N-acyltransferase		PCAdmix_DOG
	ENSCAFG00000023863	BAAT	BAAT	11	58102592	58109339	-1		LOC481635	bile acid-CoA:amino acid N-acyltransferase	bile acid-CoA:amino acid N-acyltransferase [Source:HGNC Symbol;Acc:HGNC:932]	PCAdmix_DOG
	ENSCAFG00000032597	MRPL50	MRPL50	11	58125892	58129665	-1		MRPL50	mitochondrial ribosomal protein L50	mitochondrial ribosomal protein L50 [Source:HGNC Symbol;Acc:HGNC:16654]	PCAdmix_DOG
	ENSCAFG00000002596	ZNF189	ZNF189	11	58129695	58140710	1		ZNF189	zinc finger protein 189	zinc finger protein 189 [Source:HGNC Symbol;Acc:HGNC:12980]	PCAdmix_DOG
	ENSCAFG00000002598	ALDOB	ALDOB	11	58151058	58166867	-1		ALDOB	aldolase B, fructose-bisphosphate	aldolase, fructose-bisphosphate B [Source:HGNC Symbol;Acc:HGNC:417]	PCAdmix_DOG
	ENSCAFG00000002603	TMEM246	TMEM246	11	58200051	58201262	-1		TMEM246	transmembrane protein 246	transmembrane protein 246 [Source:HGNC Symbol;Acc:HGNC:28180]	PCAdmix_DOG
	ENSCAFG00000002607	RNF20	RNF20	11	58239074	58270619	1		RNF20	ring finger protein 20, E3 ubiquitin protein ligase	ring finger protein 20 [Source:HGNC Symbol;Acc:HGNC:10062]	PCAdmix_DOG
	ENSCAFG00000002617	GRIN3A	GRIN3A	11	58271748	58421761	-1		GRIN3A	glutamate receptor, ionotropic, N-methyl-D-aspartate 3A	glutamate ionotropic receptor NMDA type subunit 3A [Source:HGNC Symbol;Acc:HGNC:16767]	PCAdmix_DOG
	ENSCAFG00000002624	CYLC2	CYLC2	11	59233061	59246462	1		CYLC2	cylicin, basic protein of sperm head cytoskeleton 2	cylicin 2 [Source:HGNC Symbol;Acc:HGNC:2583]	PCAdmix_DOG
	ENSCAFG00000030806			11	59629834	59630666	1					PCAdmix_DOG
	ENSCAFG00000002674		LOC102156133	11	60277523	60281634	1		LOC102156133	E3 ubiquitin-protein ligase Topors-like		PCAdmix_DOG
	ENSCAFG00000030606	OR13F1	OR13F1	11	60467150	60468085	1		LOC100685319	olfactory receptor 13F1-like	olfactory receptor family 13 subfamily F member 1 [Source:HGNC Symbol;Acc:HGNC:14723]	PCAdmix_DOG
	ENSCAFG00000002678	OR13C4	OR13C4	11	60492680	60493636	-1		LOC100685402	olfactory receptor 13C4-like	olfactory receptor family 13 subfamily C member 4 [Source:HGNC Symbol;Acc:HGNC:14722]	PCAdmix_DOG
	ENSCAFG00000002679	OR13C8	OR13C8	11	60531372	60532331	1		LOC100685557	olfactory receptor 13C8	olfactory receptor family 13 subfamily C member 8 [Source:HGNC Symbol;Acc:HGNC:15103]	PCAdmix_DOG
	ENSCAFG00000002680		LOC100685645	11	60558285	60559193	1		LOC100685645	olfactory receptor 13D1-like		PCAdmix_DOG
	ENSCAFG00000031077	OR13F1	OR13F1	11	60565459	60566400	-1		OR13F1	cOR13F4 olfactory receptor family 13 subfamily F-like		PCAdmix_DOG
	ENSCAFG00000030353		OR13C2	11	60575241	60576194	-1		OR13C2	olfactory receptor, family 13, subfamily C, member 2		PCAdmix_DOG
	ENSCAFG00000032686	COR13C13	COR13C13	11	60626788	60627750	-1		COR13C13	olfactory receptor family 13 subfamily C		PCAdmix_DOG
	ENSCAFG00000032550		LOC100685888	11	60643795	60644742	1		LOC100685888	olfactory receptor 13D1-like		PCAdmix_DOG
	ENSCAFG00000029270		LOC100685970	11	60678096	60679052	1		LOC100685970	olfactory receptor 13D1-like		PCAdmix_DOG
	ENSCAFG00000032327		LOC610556	11	60691604	60692527	1		LOC610556	olfactory receptor 13D1		PCAdmix_DOG
	ENSCAFG00000023949	NIPSNAP3A	NIPSNAP3A	11	60715163	60757248	1		NIPSNAP3A	nipsnap homolog 3A (C. elegans)	nipsnap homolog 3A [Source:HGNC Symbol;Acc:HGNC:23619]	PCAdmix_DOG
	ENSCAFG00000002727	ABCA1	ABCA1	11	60764299	60869753	-1		ABCA1	ATP-binding cassette, sub-family A (ABC1), member 1	ATP binding cassette subfamily A member 1 [Source:HGNC Symbol;Acc:HGNC:29]	PCAdmix_DOG
	ENSCAFG00000002758	SLC44A1	SLC44A1	11	61120976	61268862	1		SLC44A1	solute carrier family 44 (choline transporter), member 1	solute carrier family 44 member 1 [Source:HGNC Symbol;Acc:HGNC:18798]	PCAdmix_DOG
	ENSCAFG00000002767	FSD1L	FSD1L	11	61211821	61382355	1		FSD1L	fibronectin type III and SPRY domain containing 1-like	fibronectin type III and SPRY domain containing 1 like [Source:HGNC Symbol;Acc:HGNC:13753]	PCAdmix_DOG
	ENSCAFG00000002770	FKTN	FKTN	11	61405034	61456978	1		FKTN	fukutin	fukutin [Source:HGNC Symbol;Acc:HGNC:3622]	PCAdmix_DOG
	ENSCAFG00000032112	TAL2	TAL2	11	61468999	61485160	1		TAL2	T-cell acute lymphocytic leukemia 2	T-cell acute lymphocytic leukemia 2 [Source:HGNC Symbol;Acc:HGNC:11557]	PCAdmix_DOG
	ENSCAFG00000024981	TMEM38B	TMEM38B	11	61511681	61560530	1		TMEM38B	transmembrane protein 38B	transmembrane protein 38B [Source:HGNC Symbol;Acc:HGNC:25535]	PCAdmix_DOG
	ENSCAFG00000002774	ZNF462	ZNF462	11	62401720	62532582	1		ZNF462	zinc finger protein 462	zinc finger protein 462 [Source:HGNC Symbol;Acc:HGNC:21684]	PCAdmix_DOG
	ENSCAFG00000002792	RAD23B	RAD23B	11	62733103	62775843	1		RAD23B	RAD23 homolog B, nucleotide excision repair protein	RAD23 homolog B, nucleotide excision repair protein [Source:HGNC Symbol;Acc:HGNC:9813]	PCAdmix_DOG
	ENSCAFG00000002797	KLF4	KLF4	11	62882767	62886879	-1				Kruppel like factor 4 [Source:HGNC Symbol;Acc:HGNC:6348]	PCAdmix_DOG
	ENSCAFG00000002799	ACTL7B	ACTL7B	11	64028093	64029457	-1		ACTL7B	actin-like 7B	actin like 7B [Source:HGNC Symbol;Acc:HGNC:162]	PCAdmix_DOG
	ENSCAFG00000002803	ACTL7A	ACTL7A	11	64032466	64033788	1		ACTL7A	actin-like 7A	actin like 7A [Source:HGNC Symbol;Acc:HGNC:161]	PCAdmix_DOG
	ENSCAFG00000002818	IKBKAP	IKBKAP	11	64037794	64092398	-1		IKBKAP	inhibitor of kappa light polypeptide gene enhancer in B-cells, kinase complex-associated protein	inhibitor of kappa light polypeptide gene enhancer in B-cells, kinase complex-associated protein [Source:HGNC Symbol;Acc:HGNC:5959]	PCAdmix_DOG
	ENSCAFG00000028510	FAM206A	FAM206A	11	64094721	64101711	1		FAM206A	family with sequence similarity 206, member A	family with sequence similarity 206 member A [Source:HGNC Symbol;Acc:HGNC:1364]	PCAdmix_DOG
	ENSCAFG00000002835	CTNNAL1	CTNNAL1	11	64101800	64160823	-1		CTNNAL1	catenin (cadherin-associated protein), alpha-like 1	catenin alpha like 1 [Source:HGNC Symbol;Acc:HGNC:2512]	PCAdmix_DOG
	ENSCAFG00000002837	TMEM245	TMEM245	11	64169756	64267273	-1		TMEM245	transmembrane protein 245	transmembrane protein 245 [Source:HGNC Symbol;Acc:HGNC:1363]	PCAdmix_DOG
	ENSCAFG00000002840	FRRS1L	FRRS1L	11	64281895	64447650	-1				ferric chelate reductase 1 like [Source:HGNC Symbol;Acc:HGNC:1362]	PCAdmix_DOG
	ENSCAFG00000002847	EPB41L4B	EPB41L4B	11	64312862	64447436	-1		EPB41L4B	erythrocyte membrane protein band 4.1 like 4B	erythrocyte membrane protein band 4.1 like 4B [Source:HGNC Symbol;Acc:HGNC:19818]	PCAdmix_DOG
	ENSCAFG00000002868	PTPN3	PTPN3	11	64489932	64592132	-1		PTPN3	protein tyrosine phosphatase, non-receptor type 3	protein tyrosine phosphatase, non-receptor type 3 [Source:HGNC Symbol;Acc:HGNC:9655]	PCAdmix_DOG
	ENSCAFG00000002894	AKAP2	AKAP2	11	64842169	65176658	1		AKAP2	A kinase (PRKA) anchor protein 2	A-kinase anchoring protein 2 [Source:HGNC Symbol;Acc:HGNC:372]	PCAdmix_DOG
	ENSCAFG00000029601	C9orf152	C9orf152	11	65192247	65194995	-1		C11H9orf152	chromosome 11 open reading frame, human C9orf152	chromosome 9 open reading frame 152 [Source:HGNC Symbol;Acc:HGNC:31455]	PCAdmix_DOG
	ENSCAFG00000032363	TXNDC8	TXNDC8	11	65268060	65288394	-1				thioredoxin domain containing 8 [Source:HGNC Symbol;Acc:HGNC:31454]	PCAdmix_DOG
	ENSCAFG00000002928	SVEP1	SVEP1	11	65312562	65493976	-1		SVEP1	sushi, von Willebrand factor type A, EGF and pentraxin domain containing 1	sushi, von Willebrand factor type A, EGF and pentraxin domain containing 1 [Source:HGNC Symbol;Acc:HGNC:15985]	PCAdmix_DOG
	ENSCAFG00000032331			11	65552328	65572085	1					PCAdmix_DOG
	ENSCAFG00000029667			11	65631243	65638785	1					PCAdmix_DOG
	ENSCAFG00000002978	LPAR1	LPAR1	11	65690737	65822272	-1		LPAR1	lysophosphatidic acid receptor 1	lysophosphatidic acid receptor 1 [Source:HGNC Symbol;Acc:HGNC:3166]	PCAdmix_DOG
	ENSCAFG00000002983	OR2K2	OR2K2	11	66032137	66033099	-1		LOC100856036	olfactory receptor 2K2	olfactory receptor family 2 subfamily K member 2 [Source:HGNC Symbol;Acc:HGNC:8264]	PCAdmix_DOG
	ENSCAFG00000002990		KIAA0368	11	66048585	66141802	-1		KIAA0368	KIAA0368 ortholog		PCAdmix_DOG
	ENSCAFG00000030311			11	66083732	66084911	-1					PCAdmix_DOG
	ENSCAFG00000002996	ZNF483	ZNF483	11	66165855	66176259	1		ZNF483	zinc finger protein 483	zinc finger protein 483 [Source:HGNC Symbol;Acc:HGNC:23384]	PCAdmix_DOG
	ENSCAFG00000003000		PTGR1	11	66189887	66209218	-1		PTGR1	prostaglandin reductase 1		PCAdmix_DOG
	ENSCAFG00000030529			11	66211298	66212278	1					PCAdmix_DOG
	ENSCAFG00000032765			11	66234288	66235340	-1					PCAdmix_DOG
	ENSCAFG00000003006	DNAJC25	DNAJC25	11	66234644	66263064	1		DNAJC25	DnaJ (Hsp40) homolog, subfamily C , member 25	DnaJ heat shock protein family (Hsp40) member C25 [Source:HGNC Symbol;Acc:HGNC:34187]	PCAdmix_DOG
	ENSCAFG00000003008	C9orf84	C9orf84	11	66281879	66357070	-1		C11H9orf84	chromosome 11 open reading frame, human C9orf84	chromosome 9 open reading frame 84 [Source:HGNC Symbol;Acc:HGNC:26535]	PCAdmix_DOG
	ENSCAFG00000003010	UGCG	UGCG	11	66439294	66476480	1		UGCG	UDP-glucose ceramide glucosyltransferase	UDP-glucose ceramide glucosyltransferase [Source:HGNC Symbol;Acc:HGNC:12524]	PCAdmix_DOG
	ENSCAFG00000031182	MRPL14	MRPL14	12	12535876	12550826	-1		MRPL14	mitochondrial ribosomal protein L14	mitochondrial ribosomal protein L14 [Source:HGNC Symbol;Acc:HGNC:14279]	PCAdmix_DOG
	ENSCAFG00000001941	TMEM63B	TMEM63B	12	12550915	12575984	1		TMEM63B	transmembrane protein 63B	transmembrane protein 63B [Source:HGNC Symbol;Acc:HGNC:17735]	PCAdmix_DOG
	ENSCAFG00000001960	CAPN11	CAPN11	12	12580856	12600306	1				calpain 11 [Source:HGNC Symbol;Acc:HGNC:1478]	PCAdmix_DOG
	ENSCAFG00000029485			12	12628805	12630095	1					PCAdmix_DOG
	ENSCAFG00000001981	HSP90AB1	HSP90AB1	12	12638122	12664676	1		SLC29A1	solute carrier family 29 (equilibrative nucleoside transporter), member 1	equilibrative nucleoside transporter 1 [Source:RefSeq peptide;Acc:NP_001003367]	PCAdmix_DOG
	ENSCAFG00000001983	SLC35B2	SLC35B2	12	12665810	12668484	-1		SLC35B2	solute carrier family 35 (adenosine 3'-phospho 5'-phosphosulfate transporter), member B2	adenosine 3'-phospho 5'-phosphosulfate transporter 1 precursor [Source:RefSeq peptide;Acc:NP_001120971]	PCAdmix_DOG
	ENSCAFG00000001985			12	12668368	12674069	-1					PCAdmix_DOG
	ENSCAFG00000001986	TMEM151B	TMEM151B	12	12680752	12683927	1		TMEM151B	transmembrane protein 151B	transmembrane protein 151B [Source:HGNC Symbol;Acc:HGNC:21315]	PCAdmix_DOG
	ENSCAFG00000001987	TCTE1	TCTE1	12	12687892	12704673	-1		TCTE1	t-complex-associated-testis-expressed 1	t-complex-associated-testis-expressed 1 [Source:HGNC Symbol;Acc:HGNC:11693]	PCAdmix_DOG
	ENSCAFG00000001989	AARS2	AARS2	12	12706806	12718821	-1		AARS2	alanyl-tRNA synthetase 2, mitochondrial	alanyl-tRNA synthetase 2, mitochondrial [Source:HGNC Symbol;Acc:HGNC:21022]	PCAdmix_DOG
	ENSCAFG00000031540	SPATS1	SPATS1	12	12748978	12775294	1				spermatogenesis associated serine rich 1 [Source:HGNC Symbol;Acc:HGNC:22957]	PCAdmix_DOG
	ENSCAFG00000032757			12	12777557	12778015	-1					PCAdmix_DOG
	ENSCAFG00000001996	CDC5L	CDC5L	12	12779719	12826445	1		CDC5L	cell division cycle 5-like	cell division cycle 5 like [Source:HGNC Symbol;Acc:HGNC:1743]	PCAdmix_DOG
	ENSCAFG00000002002		SUPT3H	12	13155010	13404595	-1		SUPT3H	suppressor of Ty 3 homolog (S. cerevisiae)		PCAdmix_DOG
	ENSCAFG00000002008			12	13786142	13843688	1					PCAdmix_DOG
	ENSCAFG00000002016	CLIC5	CLIC5	12	14165150	14261409	-1		CLIC5	chloride intracellular channel 5	chloride intracellular channel 5 [Source:HGNC Symbol;Acc:HGNC:13517]	PCAdmix_DOG
	ENSCAFG00000002020	ENPP4	ENPP4	12	14353487	14365952	1		ENPP4	ectonucleotide pyrophosphatase/phosphodiesterase 4 (putative)	ectonucleotide pyrophosphatase/phosphodiesterase 4 (putative) [Source:HGNC Symbol;Acc:HGNC:3359]	PCAdmix_DOG
	ENSCAFG00000002021	ENPP5	ENPP5	12	14378400	14385171	-1		ENPP5	ectonucleotide pyrophosphatase/phosphodiesterase 5 (putative)	ectonucleotide pyrophosphatase/phosphodiesterase 5 (putative) [Source:HGNC Symbol;Acc:HGNC:13717]	PCAdmix_DOG
	ENSCAFG00000002023	RCAN2	RCAN2	12	14426939	14647974	-1		RCAN2	regulator of calcineurin 2	regulator of calcineurin 2 [Source:HGNC Symbol;Acc:HGNC:3041]	PCAdmix_DOG
	ENSCAFG00000002026	CYP39A1	CYP39A1	12	14727773	14817905	-1				cytochrome P450 family 39 subfamily A member 1 [Source:HGNC Symbol;Acc:HGNC:17449]	PCAdmix_DOG
	ENSCAFG00000002029	SLC25A27	SLC25A27	12	14818396	14841683	1		SLC25A27	solute carrier family 25, member 27	Canis lupus familiaris solute carrier family 25, member 27 (SLC25A27), mRNA. [Source:RefSeq mRNA;Acc:NM_001284455]	PCAdmix_DOG
	ENSCAFG00000002036	TDRD6	TDRD6	12	14849838	14867242	1		TDRD6	tudor domain containing 6	tudor domain containing 6 [Source:HGNC Symbol;Acc:HGNC:21339]	PCAdmix_DOG
	ENSCAFG00000002037	PLA2G7	PLA2G7	12	14865596	14907727	-1		PLA2G7	phospholipase A2, group VII (platelet-activating factor acetylhydrolase, plasma)	phospholipase A2 group VII [Source:HGNC Symbol;Acc:HGNC:9040]	PCAdmix_DOG
	ENSCAFG00000028803	ANKRD66	ANKRD66	12	14919637	14933933	1		ANKRD66	ankyrin repeat domain 66	ankyrin repeat domain 66 [Source:HGNC Symbol;Acc:HGNC:44669]	PCAdmix_DOG
	ENSCAFG00000002043	MEP1A	MEP1A	12	14966246	15003461	1		MEP1A	meprin A, alpha (PABA peptide hydrolase)	meprin A subunit alpha [Source:HGNC Symbol;Acc:HGNC:7015]	PCAdmix_DOG
	ENSCAFG00000002054	ADGRF5	ADGRF5	12	15012562	15085972	-1		ADGRF5	adhesion G protein-coupled receptor F5	adhesion G protein-coupled receptor F5 [Source:HGNC Symbol;Acc:HGNC:19030]	PCAdmix_DOG
	ENSCAFG00000002068	ADGRF1	ADGRF1	12	15161108	15189507	-1		ADGRF1	adhesion G protein-coupled receptor F1	adhesion G protein-coupled receptor F1 [Source:HGNC Symbol;Acc:HGNC:18990]	PCAdmix_DOG
	ENSCAFG00000002078		TNFRSF21	12	15348061	15396810	-1		TNFRSF21	tumor necrosis factor receptor superfamily, member 21		PCAdmix_DOG
	ENSCAFG00000002084			12	15437058	15438426	1					PCAdmix_DOG
	ENSCAFG00000002089	CD2AP	CD2AP	12	15552173	15680950	1		CD2AP	CD2-associated protein	CD2-associated protein [Source:HGNC Symbol;Acc:HGNC:14258]	PCAdmix_DOG
	ENSCAFG00000002092	ADGRF2	ADGRF2	12	15717128	15727336	1		ADGRF2	adhesion G protein-coupled receptor F2	adhesion G protein-coupled receptor F2 [Source:HGNC Symbol;Acc:HGNC:18991]	PCAdmix_DOG
	ENSCAFG00000002095	ADGRF4	ADGRF4	12	15748181	15767598	1		ADGRF4	adhesion G protein-coupled receptor F4	adhesion G protein-coupled receptor F4 [Source:HGNC Symbol;Acc:HGNC:19011]	PCAdmix_DOG
	ENSCAFG00000002156	TFAP2B	TFAP2B	12	18544452	18570222	1		TFAP2B	transcription factor AP-2 beta (activating enhancer binding protein 2 beta)	Transcription factor AP-2-beta [Source:UniProtKB/Swiss-Prot;Acc:Q76HI7]	PCAdmix_DOG
	ENSCAFG00000002165	PKHD1	PKHD1	12	19286822	19754951	-1		PKHD1	polycystic kidney and hepatic disease 1 (autosomal recessive)	polycystic kidney and hepatic disease 1 (autosomal recessive) [Source:HGNC Symbol;Acc:HGNC:9016]	PCAdmix_DOG
	ENSCAFG00000002214	TRAM2	TRAM2	12	20137379	20218735	-1				translocation associated membrane protein 2 [Source:HGNC Symbol;Acc:HGNC:16855]	PCAdmix_DOG
	ENSCAFG00000002220			12	20303690	20313279	1					PCAdmix_DOG
	ENSCAFG00000031682		LOC481841	12	20320070	20334201	-1		LOC481841	glutathione S-transferase-like		PCAdmix_DOG
	ENSCAFG00000002325			12	22230212	22232479	1					PCAdmix_DOG
	ENSCAFG00000002327	FAM83B	FAM83B	12	22256098	22342122	1		FAM83B	family with sequence similarity 83, member B	family with sequence similarity 83 member B [Source:HGNC Symbol;Acc:HGNC:21357]	PCAdmix_DOG
	ENSCAFG00000002328	HCRTR2	HCRTR2	12	22517482	22623358	1	Narcolepsy	HCRTR2	hypocretin (orexin) receptor 2	Orexin receptor type 2 [Source:UniProtKB/Swiss-Prot;Acc:Q9TUP7]	PCAdmix_DOG
	ENSCAFG00000002331	GFRAL	GFRAL	12	22646455	22702637	1		GFRAL	GDNF family receptor alpha like	GDNF family receptor alpha like [Source:HGNC Symbol;Acc:HGNC:32789]	PCAdmix_DOG
	ENSCAFG00000002341	HMGCLL1	HMGCLL1	12	22748729	22899899	-1		HMGCLL1	3-hydroxymethyl-3-methylglutaryl-CoA lyase-like 1	3-hydroxymethyl-3-methylglutaryl-CoA lyase-like 1 [Source:HGNC Symbol;Acc:HGNC:21359]	PCAdmix_DOG
	ENSCAFG00000002345	BMP5	BMP5	12	23087864	23202150	-1		BMP5	bone morphogenetic protein 5	bone morphogenetic protein 5 [Source:HGNC Symbol;Acc:HGNC:1072]	PCAdmix_DOG
	ENSCAFG00000002348	COL21A1	COL21A1	12	23360450	23476025	-1		COL21A1	collagen, type XXI, alpha 1	collagen type XXI alpha 1 chain [Source:HGNC Symbol;Acc:HGNC:17025]	PCAdmix_DOG
	ENSCAFG00000002413	DST	DST	12	23714642	24195420	-1		DST	dystonin	dystonin [Source:HGNC Symbol;Acc:HGNC:1090]	PCAdmix_DOG
	ENSCAFG00000010364			12	24171254	24171756	-1					PCAdmix_DOG
	ENSCAFG00000002447	BEND6	BEND6	12	24195899	24255765	1		BEND6	BEN domain containing 6	BEN domain containing 6 [Source:HGNC Symbol;Acc:HGNC:20871]	PCAdmix_DOG
	ENSCAFG00000030049			12	24224622	24225056	-1					PCAdmix_DOG
	ENSCAFG00000002451	ZNF451	ZNF451	12	24260547	24351889	1		ZNF451	zinc finger protein 451	zinc finger protein 451 [Source:HGNC Symbol;Acc:HGNC:21091]	PCAdmix_DOG
	ENSCAFG00000028759	BAG2	BAG2	12	24353663	24372598	1		BAG2	BCL2-associated athanogene 2	BCL2 associated athanogene 2 [Source:HGNC Symbol;Acc:HGNC:938]	PCAdmix_DOG
	ENSCAFG00000002459	RAB23	RAB23	12	24388120	24421842	1		RAB23	RAB23, member RAS oncogene family	RAB23, member RAS oncogene family [Source:HGNC Symbol;Acc:HGNC:14263]	PCAdmix_DOG
	ENSCAFG00000023267	PRIM2	PRIM2	12	24504197	24812205	1		PRIM2	primase, DNA, polypeptide 2 (58kDa)	primase (DNA) subunit 2 [Source:HGNC Symbol;Acc:HGNC:9370]	PCAdmix_DOG
	ENSCAFG00000002470	KHDRBS2	KHDRBS2	12	25586773	26142304	-1		KHDRBS2	KH domain containing, RNA binding, signal transduction associated 2	KH RNA binding domain containing, signal transduction associated 2 [Source:HGNC Symbol;Acc:HGNC:18114]	PCAdmix_DOG
	ENSCAFG00000002782	MEI4	MEI4	12	38848867	39027763	1		MEI4	meiotic double-stranded break formation protein 4	meiotic double-stranded break formation protein 4 [Source:HGNC Symbol;Acc:HGNC:43638]	PCAdmix_DOG
	ENSCAFG00000002783		ASNA1	12	38861567	38862614	-1		ASNA1	arsA arsenite transporter, ATP-binding, homolog 1 (bacterial)		PCAdmix_DOG
	ENSCAFG00000002790			12	39254685	39255711	1					PCAdmix_DOG
	ENSCAFG00000023918			12	39491091	39491409	1					PCAdmix_DOG
	ENSCAFG00000002793	IRAK1BP1	IRAK1BP1	12	39857057	39884499	1		IRAK1BP1	interleukin-1 receptor-associated kinase 1 binding protein 1	interleukin 1 receptor associated kinase 1 binding protein 1 [Source:HGNC Symbol;Acc:HGNC:17368]	PCAdmix_DOG
	ENSCAFG00000002804	PHIP	PHIP	12	39899673	40032051	-1		PHIP	pleckstrin homology domain interacting protein	pleckstrin homology domain interacting protein [Source:HGNC Symbol;Acc:HGNC:15673]	PCAdmix_DOG
	ENSCAFG00000002809	HMGN3	HMGN3	12	40136749	40148448	-1				high mobility group nucleosomal binding domain 3 [Source:HGNC Symbol;Acc:HGNC:12312]	PCAdmix_DOG
	ENSCAFG00000002822	LCA5	LCA5	12	40440370	40493703	-1		LCA5	Leber congenital amaurosis 5	LCA5, lebercilin [Source:HGNC Symbol;Acc:HGNC:31923]	PCAdmix_DOG
	ENSCAFG00000002824	SH3BGRL2	SH3BGRL2	12	40634083	40653395	1				SH3 domain binding glutamate rich protein like 2 [Source:HGNC Symbol;Acc:HGNC:15567]	PCAdmix_DOG
	ENSCAFG00000030132	ELOVL4	ELOVL4	12	40842746	40876513	-1		ELOVL4	ELOVL fatty acid elongase 4	ELOVL fatty acid elongase 4 [Source:HGNC Symbol;Acc:HGNC:14415]	PCAdmix_DOG
	ENSCAFG00000002842	TTK	TTK	12	40915425	40957357	1		TTK	TTK protein kinase	TTK protein kinase [Source:HGNC Symbol;Acc:HGNC:12401]	PCAdmix_DOG
	ENSCAFG00000002848	BCKDHB	BCKDHB	12	41009767	41225028	1		BCKDHB	branched chain keto acid dehydrogenase E1, beta polypeptide	branched chain keto acid dehydrogenase E1, beta polypeptide [Source:HGNC Symbol;Acc:HGNC:987]	PCAdmix_DOG
	ENSCAFG00000002879	UBE3D	UBE3D	12	43326837	43476431	-1		UBE3D	ubiquitin protein ligase E3D	ubiquitin protein ligase E3D [Source:HGNC Symbol;Acc:HGNC:21381]	PCAdmix_DOG
	ENSCAFG00000002898	DOPEY1	DOPEY1	12	43512453	43585180	1		DOPEY1	dopey family member 1	dopey family member 1 [Source:HGNC Symbol;Acc:HGNC:21194]	PCAdmix_DOG
	ENSCAFG00000002929	PGM3	PGM3	12	43583915	43610825	-1		PGM3	phosphoglucomutase 3	phosphoglucomutase 3 [Source:HGNC Symbol;Acc:HGNC:8907]	PCAdmix_DOG
	ENSCAFG00000030550	RWDD2A	RWDD2A	12	43612583	43617252	1		RWDD2A	RWD domain containing 2A	RWD domain containing 2A [Source:HGNC Symbol;Acc:HGNC:21385]	PCAdmix_DOG
	ENSCAFG00000002941		ME1	12	43621454	43789839	-1		ME1	malic enzyme 1, NADP(+)-dependent, cytosolic		PCAdmix_DOG
	ENSCAFG00000002945		TAF1D	12	43693681	43694921	-1		TAF1D	TATA box binding protein (TBP)-associated factor, RNA polymerase I, D, 41kDa		PCAdmix_DOG
	ENSCAFG00000002947	PRSS35	PRSS35	12	43904203	43905441	1		PRSS35	protease, serine, 35	protease, serine 35 [Source:HGNC Symbol;Acc:HGNC:21387]	PCAdmix_DOG
	ENSCAFG00000002951	SNAP91	SNAP91	12	43919567	44063676	-1		SNAP91	synaptosomal-associated protein, 91kDa	synaptosome associated protein 91 [Source:HGNC Symbol;Acc:HGNC:14986]	PCAdmix_DOG
	ENSCAFG00000030430	RIPPLY2	RIPPLY2	12	44163934	44168117	1				ripply transcriptional repressor 2 [Source:HGNC Symbol;Acc:HGNC:21390]	PCAdmix_DOG
	ENSCAFG00000002967	CYB5R4	CYB5R4	12	44170555	44247669	1		CYB5R4	cytochrome b5 reductase 4	cytochrome b5 reductase 4 [Source:HGNC Symbol;Acc:HGNC:20147]	PCAdmix_DOG
	ENSCAFG00000031854	MRAP2	MRAP2	12	44323941	44373279	1		MRAP2	melanocortin 2 receptor accessory protein 2	melanocortin 2 receptor accessory protein 2 [Source:HGNC Symbol;Acc:HGNC:21232]	PCAdmix_DOG
	ENSCAFG00000002979	CEP162	CEP162	12	44387489	44483803	-1		CEP162	centrosomal protein 162kDa	centrosomal protein 162 [Source:HGNC Symbol;Acc:HGNC:21107]	PCAdmix_DOG
	ENSCAFG00000003099	GABRR2	GABRR2	12	48431262	48537879	-1		GABRR2	gamma-aminobutyric acid (GABA) A receptor, rho 2	gamma-aminobutyric acid type A receptor rho2 subunit [Source:HGNC Symbol;Acc:HGNC:4091]	PCAdmix_DOG
	ENSCAFG00000003101	UBE2J1	UBE2J1	12	48542432	48562586	-1		UBE2J1	ubiquitin-conjugating enzyme E2, J1	ubiquitin conjugating enzyme E2 J1 [Source:HGNC Symbol;Acc:HGNC:17598]	PCAdmix_DOG
	ENSCAFG00000003103	RRAGD	RRAGD	12	48582574	48607105	-1				Ras related GTP binding D [Source:HGNC Symbol;Acc:HGNC:19903]	PCAdmix_DOG
	ENSCAFG00000003105	ANKRD6	ANKRD6	12	48646194	48844777	1		ANKRD6	ankyrin repeat domain 6	ankyrin repeat domain 6 [Source:HGNC Symbol;Acc:HGNC:17280]	PCAdmix_DOG
	ENSCAFG00000003109	MDN1	MDN1	12	48855622	49020864	-1		MDN1	midasin AAA ATPase 1	midasin AAA ATPase 1 [Source:HGNC Symbol;Acc:HGNC:18302]	PCAdmix_DOG
	ENSCAFG00000003113	CASP8AP2	CASP8AP2	12	49041494	49077596	1		CASP8AP2	caspase 8 associated protein 2	caspase 8 associated protein 2 [Source:HGNC Symbol;Acc:HGNC:1510]	PCAdmix_DOG
	ENSCAFG00000003115	GJA10	GJA10	12	49092747	49097743	1		GJA10	gap junction protein, alpha 10, 62kDa	gap junction protein alpha 10 [Source:HGNC Symbol;Acc:HGNC:16995]	PCAdmix_DOG
	ENSCAFG00000003116	BACH2	BACH2	12	49107523	49180453	-1		BACH2	BTB and CNC homology 1, basic leucine zipper transcription factor 2	BTB domain and CNC homolog 2 [Source:HGNC Symbol;Acc:HGNC:14078]	PCAdmix_DOG
	ENSCAFG00000029840			12	49626563	49630929	-1					PCAdmix_DOG
	ENSCAFG00000003123	MAP3K7	MAP3K7	12	49672757	49739850	-1		MAP3K7	mitogen-activated protein kinase kinase kinase 7	mitogen-activated protein kinase kinase kinase 7 [Source:HGNC Symbol;Acc:HGNC:6859]	PCAdmix_DOG
	ENSCAFG00000003332	EPHA7	EPHA7	12	52134428	52305290	-1		EPHA7	EPH receptor A7	EPH receptor A7 [Source:HGNC Symbol;Acc:HGNC:3390]	PCAdmix_DOG
	ENSCAFG00000030881			12	52207513	52354182	-1					PCAdmix_DOG
	ENSCAFG00000003554	ASCC3	ASCC3	12	58592025	58932720	-1		ASCC3	activating signal cointegrator 1 complex subunit 3	activating signal cointegrator 1 complex subunit 3 [Source:HGNC Symbol;Acc:HGNC:18697]	PCAdmix_DOG
	ENSCAFG00000003564			12	59069085	59070296	-1					PCAdmix_DOG
	ENSCAFG00000003580	GRIK2	GRIK2	12	59590231	59992091	1		GRIK2	glutamate receptor, ionotropic, kainate 2	glutamate ionotropic receptor kainate type subunit 2 [Source:HGNC Symbol;Acc:HGNC:4580]	PCAdmix_DOG
	ENSCAFG00000003592	HACE1	HACE1	12	62229417	62337163	-1		HACE1	HECT domain and ankyrin repeat containing E3 ubiquitin protein ligase 1	HECT domain and ankyrin repeat containing E3 ubiquitin protein ligase 1 [Source:HGNC Symbol;Acc:HGNC:21033]	PCAdmix_DOG
	ENSCAFG00000003732	C6orf203	C6orf203	12	64279052	64294667	1		C12H6orf203	chromosome 12 open reading frame, human C6orf203	chromosome 6 open reading frame 203 [Source:HGNC Symbol;Acc:HGNC:17971]	PCAdmix_DOG
	ENSCAFG00000029143	BEND3	BEND3	12	64302288	64324115	-1		BEND3	BEN domain containing 3	BEN domain containing 3 [Source:HGNC Symbol;Acc:HGNC:23040]	PCAdmix_DOG
	ENSCAFG00000030036		PDSS2	12	64372409	64620367	-1		PDSS2	prenyl (decaprenyl) diphosphate synthase, subunit 2		PCAdmix_DOG
	ENSCAFG00000031808			12	69982483	69987647	1					PCAdmix_DOG
	ENSCAFG00000004049	HDAC2	HDAC2	12	70053181	70074040	-1				histone deacetylase 2 [Source:HGNC Symbol;Acc:HGNC:4853]	PCAdmix_DOG
	ENSCAFG00000004054	HS3ST5	HS3ST5	12	70140802	70148119	-1		HS3ST5	heparan sulfate (glucosamine) 3-O-sulfotransferase 5	heparan sulfate-glucosamine 3-sulfotransferase 5 [Source:HGNC Symbol;Acc:HGNC:19419]	PCAdmix_DOG
	ENSCAFG00000028695			12	71625272	71625622	1					PCAdmix_DOG
	ENSCAFG00000004055	FRK	FRK	12	71659397	71756705	-1		FRK	fyn-related Src family tyrosine kinase	fyn related Src family tyrosine kinase [Source:HGNC Symbol;Acc:HGNC:3955]	PCAdmix_DOG
	ENSCAFG00000004060	NT5DC1	NT5DC1	12	71791683	71910400	1				5'-nucleotidase domain containing 1 [Source:HGNC Symbol;Acc:HGNC:21556]	PCAdmix_DOG
	ENSCAFG00000030721	COL10A1	COL10A1	12	71801379	71809983	-1		COL10A1	collagen, type X, alpha 1	collagen type X alpha 1 chain [Source:HGNC Symbol;Acc:HGNC:2185]	PCAdmix_DOG
	ENSCAFG00000023770	TSPYL4	TSPYL4	12	71917210	71918406	-1		TSPYL4	TSPY-like 4	TSPY-like 4 [Source:HGNC Symbol;Acc:HGNC:21559]	PCAdmix_DOG
	ENSCAFG00000023729	TSPYL1	TSPYL1	12	71935792	71937285	-1				TSPY-like 1 [Source:HGNC Symbol;Acc:HGNC:12382]	PCAdmix_DOG
	ENSCAFG00000004071	PHF10	PHF10	12	71953729	72171731	-1		PHF10	PHD finger protein 10	PHD finger protein 10 [Source:HGNC Symbol;Acc:HGNC:18250]	PCAdmix_DOG
	ENSCAFG00000004065	C6orf120	C6orf120	12	71953943	71954512	1		C12H6orf120	chromosome 12 open reading frame, human C6orf120	chromosome 6 open reading frame 120 [Source:HGNC Symbol;Acc:HGNC:21247]	PCAdmix_DOG
	ENSCAFG00000004079	TCTE3	TCTE3	12	71984944	71998243	-1				t-complex-associated-testis-expressed 3 [Source:HGNC Symbol;Acc:HGNC:11695]	PCAdmix_DOG
	ENSCAFG00000004084	ERMARD	ERMARD	12	72001007	72027566	1		ERMARD	ER membrane-associated RNA degradation	ER membrane associated RNA degradation [Source:HGNC Symbol;Acc:HGNC:21056]	PCAdmix_DOG
	ENSCAFG00000004094	DLL1	DLL1	12	72265839	72272347	-1		DLL1	delta-like 1 (Drosophila)	delta like canonical Notch ligand 1 [Source:HGNC Symbol;Acc:HGNC:2908]	PCAdmix_DOG
	ENSCAFG00000004109	FAM120B	FAM120B	12	72305956	72379301	1		FAM120B	family with sequence similarity 120B	family with sequence similarity 120B [Source:HGNC Symbol;Acc:HGNC:21109]	PCAdmix_DOG
	ENSCAFG00000004116	PSMB1	PSMB1	12	72439727	72456252	-1				proteasome subunit beta 1 [Source:HGNC Symbol;Acc:HGNC:9537]	PCAdmix_DOG
	ENSCAFG00000004119	TBP	TBP	12	72461466	72478589	1		TBP	TATA box binding protein	TATA-box binding protein [Source:HGNC Symbol;Acc:HGNC:11588]	PCAdmix_DOG
	ENSCAFG00000030429	PDCD2	PDCD2	12	72478153	72489391	-1		PDCD2	programmed cell death 2	programmed cell death 2 [Source:HGNC Symbol;Acc:HGNC:8762]	PCAdmix_DOG
	ENSCAFG00000000967	ZHX2	ZHX2	13	21377316	21379832	1		ZHX2	zinc fingers and homeoboxes 2	zinc fingers and homeoboxes 2 [Source:HGNC Symbol;Acc:HGNC:18513]	PCAdmix_DOG
	ENSCAFG00000002271	PHF14	PHF14	14	25916867	26126822	1				PHD finger protein 14 [Source:HGNC Symbol;Acc:HGNC:22203]	PCAdmix_DOG
	ENSCAFG00000002280	THSD7A	THSD7A	14	26349647	26769944	-1		THSD7A	thrombospondin, type I, domain containing 7A	thrombospondin type 1 domain containing 7A [Source:HGNC Symbol;Acc:HGNC:22207]	PCAdmix_DOG
	ENSCAFG00000003479			16	2244990	2670824	-1					PCAdmix_DOG
	ENSCAFG00000029696			16	2259828	2260835	1					PCAdmix_DOG
	ENSCAFG00000025531			16	2728962	3641896	-1					PCAdmix_DOG
	ENSCAFG00000025145	ZNF777	ZNF777	16	14364849	14388958	-1		ZNF777	zinc finger protein 777	zinc finger protein 777 [Source:HGNC Symbol;Acc:HGNC:22213]	PCAdmix_DOG
	ENSCAFG00000004444			16	14407208	14426998	-1					PCAdmix_DOG
	ENSCAFG00000004450	KRBA1	KRBA1	16	14487552	14511207	1		KRBA1	KRAB-A domain containing 1	KRAB-A domain containing 1 [Source:HGNC Symbol;Acc:HGNC:22228]	PCAdmix_DOG
	ENSCAFG00000004465	ZNF467	ZNF467	16	14526253	14544760	-1				zinc finger protein 467 [Source:HGNC Symbol;Acc:HGNC:23154]	PCAdmix_DOG
	ENSCAFG00000004506	SSPO	SSPO	16	14548097	14599147	1		SSPO	SCO-spondin	SCO-spondin precursor [Source:RefSeq peptide;Acc:NP_001075179]	PCAdmix_DOG
	ENSCAFG00000004539	ZNF862	ZNF862	16	14604190	14638904	1		ZNF862	zinc finger protein 862	zinc finger protein 862 [Source:HGNC Symbol;Acc:HGNC:34519]	PCAdmix_DOG
	ENSCAFG00000030393			16	14636620	14636991	-1					PCAdmix_DOG
	ENSCAFG00000004543	ATP6V0E2	ATP6V0E2	16	14642056	14848522	1				ATPase H+ transporting V0 subunit e2 [Source:HGNC Symbol;Acc:HGNC:21723]	PCAdmix_DOG
	ENSCAFG00000004548			16	14662033	14663549	1					PCAdmix_DOG
	ENSCAFG00000004555	RARRES2	RARRES2	16	14671657	14673825	-1		RARRES2	retinoic acid receptor responder (tazarotene induced) 2	retinoic acid receptor responder 2 [Source:HGNC Symbol;Acc:HGNC:9868]	PCAdmix_DOG
	ENSCAFG00000029424	REPIN1	REPIN1	16	14685855	14691046	1				replication initiator 1 [Source:HGNC Symbol;Acc:HGNC:17922]	PCAdmix_DOG
	ENSCAFG00000032636	ZNF775	ZNF775	16	14694328	14712580	1				zinc finger protein 775 [Source:HGNC Symbol;Acc:HGNC:28501]	PCAdmix_DOG
	ENSCAFG00000004572	GIMAP8	GIMAP8	16	14752828	14763113	1		GIMAP8	GTPase, IMAP family member 8	GTPase, IMAP family member 8 [Source:HGNC Symbol;Acc:HGNC:21792]	PCAdmix_DOG
	ENSCAFG00000004574	GIMAP1	GIMAP1	16	14793877	14795726	-1		GIMAP1	GTPase, IMAP family member 1	GTPase, IMAP family member 1 [Source:HGNC Symbol;Acc:HGNC:23237]	PCAdmix_DOG
	ENSCAFG00000004576	GIMAP7	GIMAP7	16	14818602	14820157	1		GIMAP7	GTPase, IMAP family member 7	GTPase, IMAP family member 7 [Source:HGNC Symbol;Acc:HGNC:22404]	PCAdmix_DOG
	ENSCAFG00000004579	GIMAP4	GIMAP4	16	14828921	14833411	1		GIMAP4	GTPase, IMAP family member 4	GTPase, IMAP family member 4 [Source:HGNC Symbol;Acc:HGNC:21872]	PCAdmix_DOG
	ENSCAFG00000024858	GIMAP6	GIMAP6	16	14846997	14852147	-1				GTPase, IMAP family member 6 [Source:HGNC Symbol;Acc:HGNC:21918]	PCAdmix_DOG
	ENSCAFG00000032359	GIMAP2	GIMAP2	16	14867418	14873936	1		GIMAP2	GTPase, IMAP family member 2	GTPase, IMAP family member 2 [Source:HGNC Symbol;Acc:HGNC:21789]	PCAdmix_DOG
	ENSCAFG00000024817		LOC100687459	16	14889358	14896569	1		LOC100687459	GTPase IMAP family member 5		PCAdmix_DOG
	ENSCAFG00000004582		LOC102151258	16	14899804	14901510	-1		LOC102151258	GTPase IMAP family member 5-like		PCAdmix_DOG
	ENSCAFG00000004585	TMEM176B	TMEM176B	16	14918271	14923535	-1		TMEM176B	transmembrane protein 176B	transmembrane protein 176B [Source:HGNC Symbol;Acc:HGNC:29596]	PCAdmix_DOG
	ENSCAFG00000031409	TMEM176A	TMEM176A	16	14927915	14932939	1		TMEM176A	transmembrane protein 176A	transmembrane protein 176A [Source:HGNC Symbol;Acc:HGNC:24930]	PCAdmix_DOG
	ENSCAFG00000004665	AOC1	AOC1	16	14959421	14965897	1		AOC1	amine oxidase, copper containing 1	amine oxidase, copper containing 1 [Source:HGNC Symbol;Acc:HGNC:80]	PCAdmix_DOG
	ENSCAFG00000025442	KCNH2	KCNH2	16	15009170	15041504	-1		KCNH2	potassium channel, voltage gated eag related subfamily H, member 2	potassium voltage-gated channel subfamily H member 2 [Source:RefSeq peptide;Acc:NP_001003145]	PCAdmix_DOG
	ENSCAFG00000004687	NOS3	NOS3	16	15053167	15072277	1		NOS3	nitric oxide synthase 3 (endothelial cell)	nitric oxide synthase 3 [Source:HGNC Symbol;Acc:HGNC:7876]	PCAdmix_DOG
	ENSCAFG00000004698	ABCB8	ABCB8	16	15082147	15095736	1		ABCB8	ATP-binding cassette, sub-family B (MDR/TAP), member 8	ATP binding cassette subfamily B member 8 [Source:HGNC Symbol;Acc:HGNC:49]	PCAdmix_DOG
	ENSCAFG00000004709	ASIC3	ASIC3	16	15100104	15103985	1		ASIC3	acid sensing (proton gated) ion channel 3	acid sensing ion channel subunit 3 [Source:HGNC Symbol;Acc:HGNC:101]	PCAdmix_DOG
	ENSCAFG00000004725	CDK5	CDK5	16	15102657	15110434	-1				cyclin dependent kinase 5 [Source:HGNC Symbol;Acc:HGNC:1774]	PCAdmix_DOG
	ENSCAFG00000004623	SLC4A2	SLC4A2	16	15113460	15127511	1		SLC4A2	solute carrier family 4 (anion exchanger), member 2	solute carrier family 4 member 2 [Source:HGNC Symbol;Acc:HGNC:11028]	PCAdmix_DOG
	ENSCAFG00000004739	FASTK	FASTK	16	15124417	15130857	-1		FASTK	Fas-activated serine/threonine kinase	Fas activated serine/threonine kinase [Source:HGNC Symbol;Acc:HGNC:24676]	PCAdmix_DOG
	ENSCAFG00000004748	TMUB1	TMUB1	16	15131654	15132689	-1				transmembrane and ubiquitin like domain containing 1 [Source:HGNC Symbol;Acc:HGNC:21709]	PCAdmix_DOG
	ENSCAFG00000004773	AGAP3	AGAP3	16	15136248	15192538	1				ArfGAP with GTPase domain, ankyrin repeat and PH domain 3 [Source:HGNC Symbol;Acc:HGNC:16923]	PCAdmix_DOG
	ENSCAFG00000004799	GBX1	GBX1	16	15196136	15352581	-1				gastrulation brain homeobox 1 [Source:HGNC Symbol;Acc:HGNC:4185]	PCAdmix_DOG
	ENSCAFG00000004801	ASB10	ASB10	16	15220507	15229235	-1		ASB10	ankyrin repeat and SOCS box containing 10	ankyrin repeat and SOCS box containing 10 [Source:HGNC Symbol;Acc:HGNC:17185]	PCAdmix_DOG
	ENSCAFG00000004812	IQCA1L	IQCA1L	16	15232092	15245962	-1		IQCA1L	IQ motif containing with AAA domain 1 like	IQ motif containing with AAA domain 1 like [Source:HGNC Symbol;Acc:HGNC:22831]	PCAdmix_DOG
	ENSCAFG00000004830			16	15258411	15266417	-1					PCAdmix_DOG
	ENSCAFG00000004853	CHPF2	CHPF2	16	15274956	15279024	1				chondroitin polymerizing factor 2 [Source:HGNC Symbol;Acc:HGNC:29270]	PCAdmix_DOG
	ENSCAFG00000004865	SMARCD3	SMARCD3	16	15279418	15289275	-1		SMARCD3	SWI/SNF related, matrix associated, actin dependent regulator of chromatin, subfamily d, member 3	SWI/SNF related, matrix associated, actin dependent regulator of chromatin, subfamily d, member 3 [Source:HGNC Symbol;Acc:HGNC:11108]	PCAdmix_DOG
	ENSCAFG00000004876	NUB1	NUB1	16	15352478	15384312	1		NUB1	negative regulator of ubiquitin-like proteins 1	negative regulator of ubiquitin like proteins 1 [Source:HGNC Symbol;Acc:HGNC:17623]	PCAdmix_DOG
	ENSCAFG00000004878	WDR86	WDR86	16	15384335	15404037	-1		WDR86	WD repeat domain 86	WD repeat domain 86 [Source:HGNC Symbol;Acc:HGNC:28020]	PCAdmix_DOG
	ENSCAFG00000004885	CRYGN	CRYGN	16	15416620	15423260	-1		CRYGN	crystallin, gamma N	crystallin gamma N [Source:HGNC Symbol;Acc:HGNC:20458]	PCAdmix_DOG
	ENSCAFG00000004894	RHEB	RHEB	16	15439773	15483508	-1		RHEB	Ras homolog enriched in brain	Ras homolog enriched in brain [Source:HGNC Symbol;Acc:HGNC:10011]	PCAdmix_DOG
	ENSCAFG00000004912	PRKAG2	PRKAG2	16	15522401	15785449	-1		PRKAG2	protein kinase, AMP-activated, gamma 2 non-catalytic subunit	protein kinase AMP-activated non-catalytic subunit gamma 2 [Source:HGNC Symbol;Acc:HGNC:9386]	PCAdmix_DOG
	ENSCAFG00000004940	GALNTL5	GALNTL5	16	15841169	15898079	1				polypeptide N-acetylgalactosaminyltransferase-like 5 [Source:HGNC Symbol;Acc:HGNC:21725]	PCAdmix_DOG
	ENSCAFG00000004932	GALNT11	GALNT11	16	15921781	15951359	1		GALNT11	polypeptide N-acetylgalactosaminyltransferase 11	polypeptide N-acetylgalactosaminyltransferase 11 [Source:HGNC Symbol;Acc:HGNC:19875]	PCAdmix_DOG
	ENSCAFG00000004955	KMT2C	KMT2C	16	15963901	16157909	-1		KMT2C	lysine (K)-specific methyltransferase 2C	lysine methyltransferase 2C [Source:HGNC Symbol;Acc:HGNC:13726]	PCAdmix_DOG
	ENSCAFG00000004961	CCT8L2	CCT8L2	16	16251061	16252704	1		CCT8L2	chaperonin containing TCP1, subunit 8 (theta)-like 2	chaperonin containing TCP1 subunit 8 like 2 [Source:HGNC Symbol;Acc:HGNC:15553]	PCAdmix_DOG
	ENSCAFG00000004964	XRCC2	XRCC2	16	16402933	16429080	-1		XRCC2	X-ray repair complementing defective repair in Chinese hamster cells 2	X-ray repair cross complementing 2 [Source:HGNC Symbol;Acc:HGNC:12829]	PCAdmix_DOG
	ENSCAFG00000004971		ACTR3B	16	16471054	16555897	1		ACTR3B	ARP3 actin-related protein 3 homolog B (yeast)		PCAdmix_DOG
	ENSCAFG00000004983			16	16592008	16592846	-1					PCAdmix_DOG
	ENSCAFG00000005001			16	16841912	16842685	-1					PCAdmix_DOG
	ENSCAFG00000005036	DPP6	DPP6	16	17573692	18044138	1		DPP6	dipeptidyl-peptidase 6	dipeptidyl peptidase like 6 [Source:HGNC Symbol;Acc:HGNC:3010]	PCAdmix_DOG
	ENSCAFG00000005062	PAXIP1	PAXIP1	16	18065028	18113248	-1		PAXIP1	PAX interacting (with transcription-activation domain) protein 1	PAX interacting protein 1 [Source:HGNC Symbol;Acc:HGNC:8624]	PCAdmix_DOG
	ENSCAFG00000005077	HTR5A	HTR5A	16	18142830	18152601	1		HTR5A	5-hydroxytryptamine (serotonin) receptor 5A, G protein-coupled	5-hydroxytryptamine receptor 5A [Source:HGNC Symbol;Acc:HGNC:5300]	PCAdmix_DOG
	ENSCAFG00000005081	INSIG1	INSIG1	16	18260390	18272232	1		INSIG1	insulin induced gene 1	insulin induced gene 1 [Source:HGNC Symbol;Acc:HGNC:6083]	PCAdmix_DOG
	ENSCAFG00000005148	MNX1	MNX1	16	19508956	19514317	-1		MNX1	motor neuron and pancreas homeobox 1	motor neuron and pancreas homeobox 1 [Source:HGNC Symbol;Acc:HGNC:4979]	PCAdmix_DOG
	ENSCAFG00000005158	UBE3C	UBE3C	16	19590186	19723950	1		UBE3C	ubiquitin protein ligase E3C	ubiquitin protein ligase E3C [Source:HGNC Symbol;Acc:HGNC:16803]	PCAdmix_DOG
	ENSCAFG00000005174		DNAJB6	16	19806375	19847935	1		DNAJB6	DnaJ (Hsp40) homolog, subfamily B, member 6		PCAdmix_DOG
	ENSCAFG00000032200			16	19853201	19853989	1					PCAdmix_DOG
	ENSCAFG00000032520	PTPRN2	PTPRN2	16	19904341	20562653	-1		PTPRN2	protein tyrosine phosphatase, receptor type, N polypeptide 2	protein tyrosine phosphatase, receptor type N2 [Source:HGNC Symbol;Acc:HGNC:9677]	PCAdmix_DOG
	ENSCAFG00000005217	NCAPG2	NCAPG2	16	20648768	20712208	-1		NCAPG2	non-SMC condensin II complex, subunit G2	non-SMC condensin II complex subunit G2 [Source:HGNC Symbol;Acc:HGNC:21904]	PCAdmix_DOG
	ENSCAFG00000005228	ESYT2	ESYT2	16	20718821	20927538	-1				extended synaptotagmin 2 [Source:HGNC Symbol;Acc:HGNC:22211]	PCAdmix_DOG
	ENSCAFG00000005255	VIPR2	VIPR2	16	20928224	20987823	-1		VIPR2	vasoactive intestinal peptide receptor 2	vasoactive intestinal peptide receptor 2 [Source:HGNC Symbol;Acc:HGNC:12695]	PCAdmix_DOG
	ENSCAFG00000005301	PSD3	PSD3	16	21336735	21775932	-1		PSD3	pleckstrin and Sec7 domain containing 3	pleckstrin and Sec7 domain containing 3 [Source:HGNC Symbol;Acc:HGNC:19093]	PCAdmix_DOG
	ENSCAFG00000005321		LOC475563	16	21903500	21905261	-1		LOC475563	ubiquitin-conjugating enzyme E2 E1-like		PCAdmix_DOG
	ENSCAFG00000029768			16	21920051	21921340	-1					PCAdmix_DOG
	ENSCAFG00000005325			16	22113648	22114675	1					PCAdmix_DOG
	ENSCAFG00000005330	SH2D4A	SH2D4A	16	22143922	22211320	1		SH2D4A	SH2 domain containing 4A	SH2 domain containing 4A [Source:HGNC Symbol;Acc:HGNC:26102]	PCAdmix_DOG
	ENSCAFG00000005337	CSGALNACT1	CSGALNACT1	16	22218137	22306813	-1		CSGALNACT1	chondroitin sulfate N-acetylgalactosaminyltransferase 1	chondroitin sulfate N-acetylgalactosaminyltransferase 1 [Source:HGNC Symbol;Acc:HGNC:24290]	PCAdmix_DOG
	ENSCAFG00000005369	INTS10	INTS10	16	22607048	22638086	1		INTS10	integrator complex subunit 10	integrator complex subunit 10 [Source:HGNC Symbol;Acc:HGNC:25548]	PCAdmix_DOG
	ENSCAFG00000005378	HGSNAT	HGSNAT	16	22642609	22683869	-1		HGSNAT	heparan-alpha-glucosaminide N-acetyltransferase	heparan-alpha-glucosaminide N-acetyltransferase [Source:HGNC Symbol;Acc:HGNC:26527]	PCAdmix_DOG
	ENSCAFG00000030110	POMK	POMK	16	22698320	22722908	-1		POMK	protein-O-mannose kinase	protein-O-mannose kinase [Source:HGNC Symbol;Acc:HGNC:26267]	PCAdmix_DOG
	ENSCAFG00000005407		HOOK3	16	22792622	22901511	-1		HOOK3	hook microtubule-tethering protein 3		PCAdmix_DOG
	ENSCAFG00000005417			16	22900313	22927019	1					PCAdmix_DOG
	ENSCAFG00000029059			16	22910711	22910923	-1					PCAdmix_DOG
	ENSCAFG00000005418	THAP1	THAP1	16	22940324	22948416	1		THAP1	THAP domain containing, apoptosis associated protein 1	THAP domain containing 1 [Source:HGNC Symbol;Acc:HGNC:20856]	PCAdmix_DOG
	ENSCAFG00000005444	CHRNA6	CHRNA6	16	22990558	23009263	1		CHRNA6	cholinergic receptor, nicotinic, alpha 6 (neuronal)	cholinergic receptor nicotinic alpha 6 subunit [Source:HGNC Symbol;Acc:HGNC:15963]	PCAdmix_DOG
	ENSCAFG00000005460	CHRNB3	CHRNB3	16	23022645	23040012	-1		CHRNB3	cholinergic receptor, nicotinic, beta 3 (neuronal)	cholinergic receptor nicotinic beta 3 subunit [Source:HGNC Symbol;Acc:HGNC:1963]	PCAdmix_DOG
	ENSCAFG00000032084	SMIM19	SMIM19	16	23152489	23165771	-1		SMIM19	small integral membrane protein 19	small integral membrane protein 19 [Source:HGNC Symbol;Acc:HGNC:25166]	PCAdmix_DOG
	ENSCAFG00000005472	SLC20A2	SLC20A2	16	23225674	23289820	1		SLC20A2	solute carrier family 20 (phosphate transporter), member 2	solute carrier family 20 member 2 [Source:HGNC Symbol;Acc:HGNC:10947]	PCAdmix_DOG
	ENSCAFG00000005502	VDAC3	VDAC3	16	23276763	23289752	-1		VDAC3	voltage-dependent anion channel 3	voltage dependent anion channel 3 [Source:HGNC Symbol;Acc:HGNC:12674]	PCAdmix_DOG
	ENSCAFG00000005508	DKK4	DKK4	16	23302320	23304824	1		DKK4	dickkopf WNT signaling pathway inhibitor 4	dickkopf WNT signaling pathway inhibitor 4 [Source:HGNC Symbol;Acc:HGNC:2894]	PCAdmix_DOG
	ENSCAFG00000005517	POLB	POLB	16	23305565	23335825	-1		POLB	polymerase (DNA directed), beta	polymerase (DNA) beta [Source:HGNC Symbol;Acc:HGNC:9174]	PCAdmix_DOG
	ENSCAFG00000005526	IKBKB	IKBKB	16	23356833	23418407	-1		IKBKB	inhibitor of kappa light polypeptide gene enhancer in B-cells, kinase beta	inhibitor of kappa light polypeptide gene enhancer in B-cells, kinase beta [Source:HGNC Symbol;Acc:HGNC:5960]	PCAdmix_DOG
	ENSCAFG00000005575		PLAT	16	23469313	23495388	1		PLAT	plasminogen activator, tissue		PCAdmix_DOG
	ENSCAFG00000005586	AP3M2	AP3M2	16	23501138	23522865	-1		AP3M2	adaptor-related protein complex 3, mu 2 subunit	AP-3 complex subunit mu-2 [Source:RefSeq peptide;Acc:NP_001277040]	PCAdmix_DOG
	ENSCAFG00000005632	KAT6A	KAT6A	16	23604211	23717107	1		KAT6A	K(lysine) acetyltransferase 6A	lysine acetyltransferase 6A [Source:HGNC Symbol;Acc:HGNC:13013]	PCAdmix_DOG
	ENSCAFG00000005691	ANK1	ANK1	16	23857660	23963937	1	ER to Golgi vesicle-mediated transport	ANK1	ankyrin 1, erythrocytic	ankyrin 1 [Source:HGNC Symbol;Acc:HGNC:492]	PCAdmix_DOG
	ENSCAFG00000005710	NKX6-3	NKX6-3	16	23857836	23972711	1				NK6 homeobox 3 [Source:HGNC Symbol;Acc:HGNC:26328]	PCAdmix_DOG
	ENSCAFG00000005716	GPAT4	GPAT4	16	23987151	24009495	-1				glycerol-3-phosphate acyltransferase 4 [Source:HGNC Symbol;Acc:HGNC:20880]	PCAdmix_DOG
	ENSCAFG00000005728	GINS4	GINS4	16	24055094	24068461	-1		GINS4	GINS complex subunit 4 (Sld5 homolog)	GINS complex subunit 4 [Source:HGNC Symbol;Acc:HGNC:28226]	PCAdmix_DOG
	ENSCAFG00000005733	GOLGA7	GOLGA7	16	24083434	24101662	-1		GOLGA7	golgin A7	golgin A7 [Source:HGNC Symbol;Acc:HGNC:24876]	PCAdmix_DOG
	ENSCAFG00000005737	SFRP1	SFRP1	16	24259480	24306309	1		SFRP1	secreted frizzled-related protein 1	secreted frizzled related protein 1 [Source:HGNC Symbol;Acc:HGNC:10776]	PCAdmix_DOG
	ENSCAFG00000005744	ZMAT4	ZMAT4	16	24561867	24889045	1		ZMAT4	zinc finger, matrin-type 4	zinc finger matrin-type 4 [Source:HGNC Symbol;Acc:HGNC:25844]	PCAdmix_DOG
	ENSCAFG00000005747	C8orf4	C8orf4	16	25213029	25213400	-1		C16H8orf4	chromosome 16 open reading frame, human C8orf4	chromosome 8 open reading frame 4 [Source:HGNC Symbol;Acc:HGNC:1357]	PCAdmix_DOG
	ENSCAFG00000005748	IDO2	IDO2	16	25316588	25375245	-1		IDO2	indoleamine 2,3-dioxygenase 2	indoleamine 2,3-dioxygenase 2 [Source:HGNC Symbol;Acc:HGNC:27269]	PCAdmix_DOG
	ENSCAFG00000005758			16	25455876	25561617	1					PCAdmix_DOG
	ENSCAFG00000005769	ADAM18	ADAM18	16	25590383	25750185	1		LOC607708	disintegrin and metalloproteinase domain-containing protein 18	ADAM metallopeptidase domain 18 [Source:HGNC Symbol;Acc:HGNC:196]	PCAdmix_DOG
	ENSCAFG00000028812			16	25838321	25912349	-1					PCAdmix_DOG
	ENSCAFG00000005818		LOC607729	16	25931134	26020910	-1		LOC607729	disintegrin and metalloproteinase domain-containing protein 18-like		PCAdmix_DOG
	ENSCAFG00000005828			16	26030978	26032936	1					PCAdmix_DOG
	ENSCAFG00000005832		LOC482849	16	26042746	26177723	-1		LOC482849	disintegrin and metalloproteinase domain-containing protein 5-like		PCAdmix_DOG
	ENSCAFG00000005841	ADAM32	ADAM32	16	26238612	26400819	-1		ADAM32	ADAM metallopeptidase domain 32	ADAM metallopeptidase domain 32 [Source:HGNC Symbol;Acc:HGNC:15479]	PCAdmix_DOG
	ENSCAFG00000005847	ADAM9	ADAM9	16	26410907	26551122	-1	Cone-rod dystrophy 3	ADAM9	ADAM metallopeptidase domain 9	ADAM metallopeptidase domain 9 [Source:HGNC Symbol;Acc:HGNC:216]	PCAdmix_DOG
	ENSCAFG00000029617	TM2D2	TM2D2	16	26550894	26555937	1		TM2D2	TM2 domain containing 2	TM2 domain containing 2 [Source:HGNC Symbol;Acc:HGNC:24127]	PCAdmix_DOG
	ENSCAFG00000005863	HTRA4	HTRA4	16	26558429	26568465	-1		HTRA4	HtrA serine peptidase 4	HtrA serine peptidase 4 [Source:HGNC Symbol;Acc:HGNC:26909]	PCAdmix_DOG
	ENSCAFG00000032414	PLEKHA2	PLEKHA2	16	26567737	26629953	-1		PLEKHA2	pleckstrin homology domain containing, family A (phosphoinositide binding specific) member 2	pleckstrin homology domain containing A2 [Source:HGNC Symbol;Acc:HGNC:14336]	PCAdmix_DOG
	ENSCAFG00000005876	TACC1	TACC1	16	26677588	26797532	-1		TACC1	transforming, acidic coiled-coil containing protein 1	transforming acidic coiled-coil containing protein 1 [Source:HGNC Symbol;Acc:HGNC:11522]	PCAdmix_DOG
	ENSCAFG00000025419			16	26800619	26801229	-1					PCAdmix_DOG
	ENSCAFG00000029127			16	27029302	27030426	-1					PCAdmix_DOG
	ENSCAFG00000005970	FGFR1	FGFR1	16	27037832	27078252	1		FGFR1	fibroblast growth factor receptor 1	fibroblast growth factor receptor 1 [Source:HGNC Symbol;Acc:HGNC:3688]	PCAdmix_DOG
	ENSCAFG00000006047	LETM2	LETM2	16	27076185	27100591	-1		LETM2	leucine zipper-EF-hand containing transmembrane protein 2	leucine zipper and EF-hand containing transmembrane protein 2 [Source:HGNC Symbol;Acc:HGNC:14648]	PCAdmix_DOG
	ENSCAFG00000006057	WHSC1L1	WHSC1L1	16	27151222	27219900	1		WHSC1L1	Wolf-Hirschhorn syndrome candidate 1-like 1	Wolf-Hirschhorn syndrome candidate 1-like 1 [Source:HGNC Symbol;Acc:HGNC:12767]	PCAdmix_DOG
	ENSCAFG00000006092	PLPP5	PLPP5	16	27226196	27231157	1		PPAPDC1B	phosphatidic acid phosphatase type 2 domain containing 1B	phospholipid phosphatase 5 [Source:HGNC Symbol;Acc:HGNC:25026]	PCAdmix_DOG
	ENSCAFG00000006099	DDHD2	DDHD2	16	27244153	27257586	-1				DDHD domain containing 2 [Source:HGNC Symbol;Acc:HGNC:29106]	PCAdmix_DOG
	ENSCAFG00000006108	BAG4	BAG4	16	27273845	27303786	-1		BAG4	BCL2-associated athanogene 4	BCL2 associated athanogene 4 [Source:HGNC Symbol;Acc:HGNC:940]	PCAdmix_DOG
	ENSCAFG00000006113	LSM1	LSM1	16	27304345	27315047	1		LSM1	LSM1 homolog, mRNA degradation associated	LSM1 homolog, mRNA degradation associated [Source:HGNC Symbol;Acc:HGNC:20472]	PCAdmix_DOG
	ENSCAFG00000006126	STAR	STAR	16	27326036	27331117	1		STAR	steroidogenic acute regulatory protein	steroidogenic acute regulatory protein [Source:HGNC Symbol;Acc:HGNC:11359]	PCAdmix_DOG
	ENSCAFG00000006146	ASH2L	ASH2L	16	27335045	27366950	-1		ASH2L	ash2 (absent, small, or homeotic)-like (Drosophila)	ASH2 like histone lysine methyltransferase complex subunit [Source:HGNC Symbol;Acc:HGNC:744]	PCAdmix_DOG
	ENSCAFG00000006154	EIF4EBP1	EIF4EBP1	16	27390284	27410103	-1		EIF4EBP1	eukaryotic translation initiation factor 4E binding protein 1	eukaryotic translation initiation factor 4E binding protein 1 [Source:HGNC Symbol;Acc:HGNC:3288]	PCAdmix_DOG
	ENSCAFG00000006161	ADRB3	ADRB3	16	27445601	27447521	1		ADRB3	adrenoceptor beta 3	Canis lupus familiaris adrenoceptor beta 3 (ADRB3), mRNA. [Source:RefSeq mRNA;Acc:NM_001003377]	PCAdmix_DOG
	ENSCAFG00000006176	RAB11FIP1	RAB11FIP1	16	27462501	27531154	1		GOT1L1	glutamic-oxaloacetic transaminase 1-like 1	RAB11 family interacting protein 1 [Source:HGNC Symbol;Acc:HGNC:30265]	PCAdmix_DOG
	ENSCAFG00000006183	BRF2	BRF2	16	27543858	27547106	1		BRF2	BRF2, RNA polymerase III transcription initiation factor 50 kDa subunit	BRF2, RNA polymerase III transcription initiation factor 50 kDa subunit [Source:HGNC Symbol;Acc:HGNC:17298]	PCAdmix_DOG
	ENSCAFG00000006188	ADGRA2	ADGRA2	16	27549308	27583699	-1		ADGRA2	adhesion G protein-coupled receptor A2	adhesion G protein-coupled receptor A2 [Source:HGNC Symbol;Acc:HGNC:17849]	PCAdmix_DOG
	ENSCAFG00000006193			16	27598817	27614612	-1					PCAdmix_DOG
	ENSCAFG00000006211	ERLIN2	ERLIN2	16	27625447	27638744	-1		ERLIN2	ER lipid raft associated 2	ER lipid raft associated 2 [Source:HGNC Symbol;Acc:HGNC:1356]	PCAdmix_DOG
	ENSCAFG00000006224	ZNF703	ZNF703	16	27669462	27673808	-1		ZNF703	zinc finger protein 703	zinc finger protein 703 [Source:HGNC Symbol;Acc:HGNC:25883]	PCAdmix_DOG
	ENSCAFG00000023937			16	28315890	28318089	-1					PCAdmix_DOG
	ENSCAFG00000028535	KCNU1	KCNU1	16	28334366	28478440	-1		KCNU1	potassium channel, subfamily U, member 1	potassium calcium-activated channel subfamily U member 1 [Source:HGNC Symbol;Acc:HGNC:18867]	PCAdmix_DOG
	ENSCAFG00000006252	UNC5D	UNC5D	16	29210853	29430308	-1				unc-5 netrin receptor D [Source:HGNC Symbol;Acc:HGNC:18634]	PCAdmix_DOG
	ENSCAFG00000029801	DUSP26	DUSP26	16	31115591	31118030	1		DUSP26	dual specificity phosphatase 26 (putative)	dual specificity phosphatase 26 (putative) [Source:HGNC Symbol;Acc:HGNC:28161]	PCAdmix_DOG
	ENSCAFG00000006291	RNF122	RNF122	16	31135944	31144648	1				ring finger protein 122 [Source:HGNC Symbol;Acc:HGNC:21147]	PCAdmix_DOG
	ENSCAFG00000006302	TTI2	TTI2	16	31161253	31167749	1		TTI2	TELO2 interacting protein 2	TELO2 interacting protein 2 [Source:HGNC Symbol;Acc:HGNC:26262]	PCAdmix_DOG
	ENSCAFG00000006325	MAK16	MAK16	16	31163912	31180274	-1		MAK16	MAK16 homolog	MAK16 homolog [Source:HGNC Symbol;Acc:HGNC:13703]	PCAdmix_DOG
	ENSCAFG00000006336	FUT10	FUT10	16	31194606	31264963	1		FUT10	fucosyltransferase 10 (alpha (1,3) fucosyltransferase)	fucosyltransferase 10 [Source:HGNC Symbol;Acc:HGNC:19234]	PCAdmix_DOG
	ENSCAFG00000006342			16	31230343	31231127	-1					PCAdmix_DOG
	ENSCAFG00000006371	NRG1	NRG1	16	31706851	31918469	-1		NRG1	neuregulin 1	neuregulin 1 [Source:HGNC Symbol;Acc:HGNC:7997]	PCAdmix_DOG
	ENSCAFG00000006391			16	33094913	33095378	1					PCAdmix_DOG
	ENSCAFG00000006410	WRN	WRN	16	33162514	33304625	-1		WRN	Werner syndrome, RecQ helicase-like	Werner syndrome RecQ like helicase [Source:HGNC Symbol;Acc:HGNC:12791]	PCAdmix_DOG
	ENSCAFG00000006442	PURG	PURG	16	33305483	33343936	1		PURG	purine-rich element binding protein G	purine rich element binding protein G [Source:HGNC Symbol;Acc:HGNC:17930]	PCAdmix_DOG
	ENSCAFG00000006448	TEX15	TEX15	16	33458568	33517446	1		TEX15	testis expressed 15	testis expressed 15 [Source:HGNC Symbol;Acc:HGNC:11738]	PCAdmix_DOG
	ENSCAFG00000006453	PPP2CB	PPP2CB	16	33532662	33567377	1		PPP2CB	protein phosphatase 2, catalytic subunit, beta isozyme	protein phosphatase 2 catalytic subunit beta [Source:HGNC Symbol;Acc:HGNC:9300]	PCAdmix_DOG
	ENSCAFG00000006462	UBXN8	UBXN8	16	33589445	33622768	-1		UBXN8	UBX domain protein 8	UBX domain protein 8 [Source:HGNC Symbol;Acc:HGNC:30307]	PCAdmix_DOG
	ENSCAFG00000006478		GSR	16	33633704	33680616	1		GSR	glutathione reductase		PCAdmix_DOG
	ENSCAFG00000006489	GTF2E2	GTF2E2	16	33707464	33778474	1		GTF2E2	general transcription factor IIE, polypeptide 2, beta 34kDa	general transcription factor IIE subunit 2 [Source:HGNC Symbol;Acc:HGNC:4651]	PCAdmix_DOG
	ENSCAFG00000006503	RBPMS	RBPMS	16	33810361	33959841	-1		RBPMS	RNA binding protein with multiple splicing	RNA binding protein with multiple splicing [Source:HGNC Symbol;Acc:HGNC:19097]	PCAdmix_DOG
	ENSCAFG00000006944	SLC7A2	SLC7A2	16	40855291	40874888	1		SLC7A2	solute carrier family 7 (cationic amino acid transporter, y+ system), member 2	solute carrier family 7 member 2 [Source:HGNC Symbol;Acc:HGNC:11060]	PCAdmix_DOG
	ENSCAFG00000006953	PDGFRL	PDGFRL	16	40888678	40954709	1		PDGFRL	platelet-derived growth factor receptor-like	platelet derived growth factor receptor like [Source:HGNC Symbol;Acc:HGNC:8805]	PCAdmix_DOG
	ENSCAFG00000006979	MTUS1	MTUS1	16	40957737	41068967	-1		MTUS1	microtubule associated tumor suppressor 1	microtubule associated tumor suppressor 1 [Source:HGNC Symbol;Acc:HGNC:29789]	PCAdmix_DOG
	ENSCAFG00000032313	FGL1	FGL1	16	41157076	41191335	-1		FGL1	fibrinogen-like 1	fibrinogen like 1 [Source:HGNC Symbol;Acc:HGNC:3695]	PCAdmix_DOG
	ENSCAFG00000007113	PCM1	PCM1	16	41223805	41290944	1		PCM1	pericentriolar material 1	pericentriolar material 1 [Source:HGNC Symbol;Acc:HGNC:8727]	PCAdmix_DOG
	ENSCAFG00000007143	ASAH1	ASAH1	16	41298214	41323077	-1		ASAH1	N-acylsphingosine amidohydrolase (acid ceramidase) 1	N-acylsphingosine amidohydrolase (acid ceramidase) 1 [Source:HGNC Symbol;Acc:HGNC:735]	PCAdmix_DOG
	ENSCAFG00000007135	FRG1	FRG1	16	41361436	41398601	-1		FRG1	FSHD region gene 1	FSHD region gene 1 [Source:HGNC Symbol;Acc:HGNC:3954]	PCAdmix_DOG
	ENSCAFG00000028470			16	41385644	41417879	1					PCAdmix_DOG
	ENSCAFG00000007217	TRIML1	TRIML1	16	42953884	42960499	-1		TRIML1	tripartite motif family-like 1	tripartite motif family like 1 [Source:HGNC Symbol;Acc:HGNC:26698]	PCAdmix_DOG
	ENSCAFG00000007236		TRIML2	16	42983363	43000036	1		TRIML2	tripartite motif family-like 2		PCAdmix_DOG
	ENSCAFG00000025203	ZFP42	ZFP42	16	43091631	43092536	-1				ZFP42 zinc finger protein [Source:HGNC Symbol;Acc:HGNC:30949]	PCAdmix_DOG
	ENSCAFG00000007273	FAT1	FAT1	16	44113051	44284761	1		FAT1	FAT atypical cadherin 1	FAT atypical cadherin 1 [Source:HGNC Symbol;Acc:HGNC:3595]	PCAdmix_DOG
	ENSCAFG00000007348	F11	F11	16	44466300	44487120	-1	Factor XI deficiency	F11	coagulation factor XI	coagulation factor XI precursor [Source:RefSeq peptide;Acc:NP_001128595]	PCAdmix_DOG
	ENSCAFG00000007364	KLKB1	KLKB1	16	44492977	44516482	-1	Prekallikrein deficiency	KLKB1	kallikrein B, plasma (Fletcher factor) 1	kallikrein B1 [Source:HGNC Symbol;Acc:HGNC:6371]	PCAdmix_DOG
	ENSCAFG00000029716			16	44520400	44521065	-1					PCAdmix_DOG
	ENSCAFG00000007384	CYP4V2	CYP4V2	16	44525644	44544809	-1				cytochrome P450 family 4 subfamily V member 2 [Source:HGNC Symbol;Acc:HGNC:23198]	PCAdmix_DOG
	ENSCAFG00000007402	FAM149A	FAM149A	16	44550409	44574420	-1		FAM149A	family with sequence similarity 149, member A	family with sequence similarity 149 member A [Source:HGNC Symbol;Acc:HGNC:24527]	PCAdmix_DOG
	ENSCAFG00000007406	TLR3	TLR3	16	44618776	44625969	-1		TLR3	toll-like receptor 3	toll like receptor 3 [Source:HGNC Symbol;Acc:HGNC:11849]	PCAdmix_DOG
	ENSCAFG00000007475	SORBS2	SORBS2	16	44882118	45066154	1		SORBS2	sorbin and SH3 domain containing 2	sorbin and SH3 domain containing 2 [Source:HGNC Symbol;Acc:HGNC:24098]	PCAdmix_DOG
	ENSCAFG00000029034	PDLIM3	PDLIM3	16	45111123	45144446	1		PDLIM3	PDZ and LIM domain 3	PDZ and LIM domain 3 [Source:HGNC Symbol;Acc:HGNC:20767]	PCAdmix_DOG
	ENSCAFG00000007552	CCDC110	CCDC110	16	45159432	45180636	1		CCDC110	coiled-coil domain containing 110	coiled-coil domain containing 110 [Source:HGNC Symbol;Acc:HGNC:28504]	PCAdmix_DOG
	ENSCAFG00000023845	C4orf47	C4orf47	16	45192191	45205670	-1		C16H4orf47	chromosome 16 open reading frame, human C4orf47	chromosome 4 open reading frame 47 [Source:HGNC Symbol;Acc:HGNC:34346]	PCAdmix_DOG
	ENSCAFG00000007558	UFSP2	UFSP2	16	45212127	45233446	1		UFSP2	UFM1-specific peptidase 2	UFM1-specific peptidase 2 [Source:HGNC Symbol;Acc:HGNC:25640]	PCAdmix_DOG
	ENSCAFG00000007563	ANKRD37	ANKRD37	16	45228887	45233446	-1		ANKRD37	ankyrin repeat domain 37	ankyrin repeat domain 37 [Source:HGNC Symbol;Acc:HGNC:29593]	PCAdmix_DOG
	ENSCAFG00000007567	LRP2BP	LRP2BP	16	45243319	45266374	1		LRP2BP	LRP2 binding protein	LRP2 binding protein [Source:HGNC Symbol;Acc:HGNC:25434]	PCAdmix_DOG
	ENSCAFG00000007582	SNX25	SNX25	16	45266241	45377831	-1		SNX25	sorting nexin 25	sorting nexin 25 [Source:HGNC Symbol;Acc:HGNC:21883]	PCAdmix_DOG
	ENSCAFG00000007591	CFAP97	CFAP97	16	45411529	45443482	1		CFAP97	cilia and flagella associated protein 97	cilia and flagella associated protein 97 [Source:HGNC Symbol;Acc:HGNC:29276]	PCAdmix_DOG
	ENSCAFG00000007596	SLC25A4	SLC25A4	16	45454662	45458511	-1		SLC25A4	solute carrier family 25 (mitochondrial carrier; adenine nucleotide translocator), member 4	solute carrier family 25 member 4 [Source:HGNC Symbol;Acc:HGNC:10990]	PCAdmix_DOG
	ENSCAFG00000007599	HELT	HELT	16	45564971	45567818	-1		HELT	helt bHLH transcription factor	helt bHLH transcription factor [Source:HGNC Symbol;Acc:HGNC:33783]	PCAdmix_DOG
	ENSCAFG00000007662	ACSL1	ACSL1	16	45735582	45806294	1		ACSL1	acyl-CoA synthetase long-chain family member 1	acyl-CoA synthetase long-chain family member 1 [Source:HGNC Symbol;Acc:HGNC:3569]	PCAdmix_DOG
	ENSCAFG00000007735	CENPU	CENPU	16	45820867	45858803	1		CENPU	centromere protein U	centromere protein U [Source:HGNC Symbol;Acc:HGNC:21348]	PCAdmix_DOG
	ENSCAFG00000007746	PRIMPOL	PRIMPOL	16	45862085	45913961	-1		PRIMPOL	primase and polymerase (DNA-directed)	primase and DNA directed polymerase [Source:HGNC Symbol;Acc:HGNC:26575]	PCAdmix_DOG
	ENSCAFG00000007750	CASP3	CASP3	16	45920071	45944998	1		CASP3	caspase 3, apoptosis-related cysteine peptidase	Caspase-3 Caspase-3 subunit p17 Caspase-3 subunit p12 [Source:UniProtKB/Swiss-Prot;Acc:Q8MKI5]	PCAdmix_DOG
	ENSCAFG00000032752			16	46015846	46016470	1					PCAdmix_DOG
	ENSCAFG00000007761	IRF2	IRF2	16	46053035	46130666	1		IRF2	interferon regulatory factor 2	interferon regulatory factor 2 [Source:HGNC Symbol;Acc:HGNC:6117]	PCAdmix_DOG
	ENSCAFG00000007793	ENPP6	ENPP6	16	46247132	46360034	1		ENPP6	ectonucleotide pyrophosphatase/phosphodiesterase 6	ectonucleotide pyrophosphatase/phosphodiesterase 6 [Source:HGNC Symbol;Acc:HGNC:23409]	PCAdmix_DOG
	ENSCAFG00000007807	STOX2	STOX2	16	46429017	46638018	-1		STOX2	storkhead box 2	storkhead box 2 [Source:HGNC Symbol;Acc:HGNC:25450]	PCAdmix_DOG
	ENSCAFG00000007825	TRAPPC11	TRAPPC11	16	46684737	46736509	-1		TRAPPC11	trafficking protein particle complex 11	trafficking protein particle complex 11 [Source:HGNC Symbol;Acc:HGNC:25751]	PCAdmix_DOG
	ENSCAFG00000007880	RWDD4	RWDD4	16	46736144	46750712	1		RWDD4	RWD domain containing 4	RWD domain-containing protein 4 [Source:RefSeq peptide;Acc:NP_001273782]	PCAdmix_DOG
	ENSCAFG00000007884	ING2	ING2	16	46845313	46850643	-1		ING2	inhibitor of growth family, member 2	inhibitor of growth family member 2 [Source:HGNC Symbol;Acc:HGNC:6063]	PCAdmix_DOG
	ENSCAFG00000007890	CDKN2AIP	CDKN2AIP	16	46898949	46903339	-1		CDKN2AIP	CDKN2A interacting protein	CDKN2A interacting protein [Source:HGNC Symbol;Acc:HGNC:24325]	PCAdmix_DOG
	ENSCAFG00000031482			16	46903113	46903889	1					PCAdmix_DOG
	ENSCAFG00000032135		CLDN24	16	47010183	47010845	1		CLDN24	claudin 24		PCAdmix_DOG
	ENSCAFG00000030597		LOC482919	16	47012372	47013037	1		LOC482919	claudin-22		PCAdmix_DOG
	ENSCAFG00000007906	WWC2	WWC2	16	47016949	47185500	-1		WWC2	WW and C2 domain containing 2	WW and C2 domain containing 2 [Source:HGNC Symbol;Acc:HGNC:24148]	PCAdmix_DOG
	ENSCAFG00000029296		LOC102156805	16	47328307	47332443	1		LOC102156805	ral guanine nucleotide dissociation stimulator-like		PCAdmix_DOG
	ENSCAFG00000031175	DCTD	DCTD	16	47350445	47387910	1				dCMP deaminase [Source:HGNC Symbol;Acc:HGNC:2710]	PCAdmix_DOG
	ENSCAFG00000008123	TENM3	TENM3	16	47438464	47883237	-1		TENM3	teneurin transmembrane protein 3	teneurin transmembrane protein 3 [Source:HGNC Symbol;Acc:HGNC:29944]	PCAdmix_DOG
	ENSCAFG00000005348	EHD3	EHD3	17	24828372	24853315	1		EHD3	EH-domain containing 3	EH domain containing 3 [Source:HGNC Symbol;Acc:HGNC:3244]	PCAdmix_DOG
	ENSCAFG00000005609	XDH	XDH	17	24901975	24960582	-1		XDH	xanthine dehydrogenase	xanthine dehydrogenase [Source:HGNC Symbol;Acc:HGNC:12805]	PCAdmix_DOG
	ENSCAFG00000006181	ATL2	ATL2	17	30437302	30493749	-1		ATL2	atlastin GTPase 2	atlastin GTPase 2 [Source:HGNC Symbol;Acc:HGNC:24047]	PCAdmix_DOG
	ENSCAFG00000029666	HNRNPLL	HNRNPLL	17	30645843	30684141	-1		HNRNPLL	heterogeneous nuclear ribonucleoprotein L-like	heterogeneous nuclear ribonucleoprotein L like [Source:HGNC Symbol;Acc:HGNC:25127]	PCAdmix_DOG
	ENSCAFG00000006254	GALM	GALM	17	30741730	30814986	1		GALM	galactose mutarotase (aldose 1-epimerase)	galactose mutarotase [Source:HGNC Symbol;Acc:HGNC:24063]	PCAdmix_DOG
	ENSCAFG00000029620	SRSF7	SRSF7	17	30805541	30816120	-1		SRSF7	serine/arginine-rich splicing factor 7	serine and arginine rich splicing factor 7 [Source:HGNC Symbol;Acc:HGNC:10789]	PCAdmix_DOG
	ENSCAFG00000006297		LOC100685565	17	30831350	30833253	1		LOC100685565	tetratricopeptide repeat protein 39B-like		PCAdmix_DOG
	ENSCAFG00000029480	GEMIN6	GEMIN6	17	30842367	30849167	1		GEMIN6	gem (nuclear organelle) associated protein 6	gem nuclear organelle associated protein 6 [Source:HGNC Symbol;Acc:HGNC:20044]	PCAdmix_DOG
	ENSCAFG00000006228	DHX57	DHX57	17	30857925	30913975	-1		DHX57	DEAH (Asp-Glu-Ala-Asp/His) box polypeptide 57	DEAH-box helicase 57 [Source:HGNC Symbol;Acc:HGNC:20086]	PCAdmix_DOG
	ENSCAFG00000006306	MORN2	MORN2	17	30916949	30921419	1				MORN repeat containing 2 [Source:HGNC Symbol;Acc:HGNC:30166]	PCAdmix_DOG
	ENSCAFG00000006310	ARHGEF33	ARHGEF33	17	30952489	30998611	1		ARHGEF33	Rho guanine nucleotide exchange factor (GEF) 33	Rho guanine nucleotide exchange factor 33 [Source:HGNC Symbol;Acc:HGNC:37252]	PCAdmix_DOG
	ENSCAFG00000031920			17	30986334	30987311	-1					PCAdmix_DOG
	ENSCAFG00000006340	SOS1	SOS1	17	31009903	31084663	-1		SOS1	son of sevenless homolog 1 (Drosophila)	SOS Ras/Rac guanine nucleotide exchange factor 1 [Source:HGNC Symbol;Acc:HGNC:11187]	PCAdmix_DOG
	ENSCAFG00000006354	CDKL4	CDKL4	17	31201115	31251058	-1		CDKL4	cyclin-dependent kinase-like 4	cyclin-dependent kinase-like 4 [Source:RefSeq peptide;Acc:NP_001300808]	PCAdmix_DOG
	ENSCAFG00000006426	MAP4K3	MAP4K3	17	31255135	31439118	-1		MAP4K3	mitogen-activated protein kinase kinase kinase kinase 3	mitogen-activated protein kinase kinase kinase kinase 3 [Source:HGNC Symbol;Acc:HGNC:6865]	PCAdmix_DOG
	ENSCAFG00000024456			17	31459335	31459823	1					PCAdmix_DOG
	ENSCAFG00000006467	TMEM178A	TMEM178A	17	31633521	31696393	1		TMEM178A	transmembrane protein 178A	transmembrane protein 178A [Source:HGNC Symbol;Acc:HGNC:28517]	PCAdmix_DOG
	ENSCAFG00000006471	THUMPD2	THUMPD2	17	31700709	31738458	-1		THUMPD2	THUMP domain containing 2	THUMP domain containing 2 [Source:HGNC Symbol;Acc:HGNC:14890]	PCAdmix_DOG
	ENSCAFG00000023592	SLC8A1	SLC8A1	17	32007297	32307690	-1		SLC8A1	solute carrier family 8 (sodium/calcium exchanger), member 1	Canis lupus familiaris solute carrier family 8 (sodium/calcium exchanger), member 1 (SLC8A1), mRNA. [Source:RefSeq mRNA;Acc:NM_001304962]	PCAdmix_DOG
	ENSCAFG00000006477			17	33317637	33318011	1					PCAdmix_DOG
	ENSCAFG00000006479	PKDCC	PKDCC	17	33659290	33668562	1		PKDCC	protein kinase domain containing, cytoplasmic	protein kinase domain containing, cytoplasmic [Source:HGNC Symbol;Acc:HGNC:25123]	PCAdmix_DOG
	ENSCAFG00000006510	EML4	EML4	17	33774389	33936389	1		EML4	echinoderm microtubule associated protein like 4	echinoderm microtubule associated protein like 4 [Source:HGNC Symbol;Acc:HGNC:1316]	PCAdmix_DOG
	ENSCAFG00000003613	GAB1	GAB1	19	9936	125457	-1		GAB1	GRB2-associated binding protein 1	GRB2 associated binding protein 1 [Source:HGNC Symbol;Acc:HGNC:4066]	PCAdmix_DOG
	ENSCAFG00000003622	USP38	USP38	19	210603	238443	-1		USP38	ubiquitin specific peptidase 38	ubiquitin specific peptidase 38 [Source:HGNC Symbol;Acc:HGNC:20067]	PCAdmix_DOG
	ENSCAFG00000003624	INPP4B	INPP4B	19	826676	1185112	1		INPP4B	inositol polyphosphate-4-phosphatase type II B	inositol polyphosphate-4-phosphatase type II B [Source:HGNC Symbol;Acc:HGNC:6075]	PCAdmix_DOG
	ENSCAFG00000003626	IL15	IL15	19	1339358	1364760	-1		IL15	interleukin 15	interleukin 15 [Source:HGNC Symbol;Acc:HGNC:5977]	PCAdmix_DOG
	ENSCAFG00000003628			19	1566518	1566798	1					PCAdmix_DOG
	ENSCAFG00000003630	ZNF330	ZNF330	19	1728268	1750032	-1		ZNF330	zinc finger protein 330	zinc finger protein 330 [Source:HGNC Symbol;Acc:HGNC:15462]	PCAdmix_DOG
	ENSCAFG00000031913			19	1746426	1922160	-1					PCAdmix_DOG
	ENSCAFG00000028804	RNF150	RNF150	19	1817202	2051331	1		RNF150	ring finger protein 150	ring finger protein 150 [Source:HGNC Symbol;Acc:HGNC:23138]	PCAdmix_DOG
	ENSCAFG00000003662	TBC1D9	TBC1D9	19	2142989	2258810	1				TBC1 domain family member 9 [Source:HGNC Symbol;Acc:HGNC:21710]	PCAdmix_DOG
	ENSCAFG00000003684	UCP1	UCP1	19	2282556	2292419	1				uncoupling protein 1 [Source:HGNC Symbol;Acc:HGNC:12517]	PCAdmix_DOG
	ENSCAFG00000029846	ELMOD2	ELMOD2	19	2294360	2325440	-1		ELMOD2	ELMO/CED-12 domain containing 2	ELMO domain containing 2 [Source:HGNC Symbol;Acc:HGNC:28111]	PCAdmix_DOG
	ENSCAFG00000031714	MGAT4D	MGAT4D	19	2339808	2382513	1				MGAT4 family member D [Source:HGNC Symbol;Acc:HGNC:43619]	PCAdmix_DOG
	ENSCAFG00000003696	CLGN	CLGN	19	2396690	2448954	1		CLGN	calmegin	Calmegin [Source:UniProtKB/Swiss-Prot;Acc:E2RA18]	PCAdmix_DOG
	ENSCAFG00000003699	SCOC	SCOC	19	2453140	2456553	-1				short coiled-coil protein [Source:HGNC Symbol;Acc:HGNC:20335]	PCAdmix_DOG
	ENSCAFG00000028984			19	2582800	2584569	1					PCAdmix_DOG
	ENSCAFG00000031075			19	2657903	2658829	1					PCAdmix_DOG
	ENSCAFG00000003700	MAML3	MAML3	19	2848164	3059740	1				mastermind like transcriptional coactivator 3 [Source:HGNC Symbol;Acc:HGNC:16272]	PCAdmix_DOG
	ENSCAFG00000003702	MGST2	MGST2	19	3067163	3070563	-1				microsomal glutathione S-transferase 2 [Source:HGNC Symbol;Acc:HGNC:7063]	PCAdmix_DOG
	ENSCAFG00000003703	SETD7	SETD7	19	3186907	3223902	1		SETD7	SET domain containing (lysine methyltransferase) 7	SET domain containing lysine methyltransferase 7 [Source:HGNC Symbol;Acc:HGNC:30412]	PCAdmix_DOG
	ENSCAFG00000003727	MGARP	MGARP	19	3411643	3423589	1		MGARP	mitochondria-localized glutamic acid-rich protein	mitochondria localized glutamic acid rich protein [Source:HGNC Symbol;Acc:HGNC:29969]	PCAdmix_DOG
	ENSCAFG00000003733	ELF2	ELF2	19	3512242	3579126	1		ELF2	E74-like factor 2 (ets domain transcription factor)	E74 like ETS transcription factor 2 [Source:HGNC Symbol;Acc:HGNC:3317]	PCAdmix_DOG
	ENSCAFG00000003725	NOCT	NOCT	19	3589720	3607191	-1		NOCT	nocturnin	nocturnin [Source:HGNC Symbol;Acc:HGNC:14254]	PCAdmix_DOG
	ENSCAFG00000003743			19	3752791	3753790	-1					PCAdmix_DOG
	ENSCAFG00000003749	SLC7A11	SLC7A11	19	4289915	4371635	1		SLC7A11	solute carrier family 7 (anionic amino acid transporter light chain, xc- system), member 11	cystine/glutamate transporter [Source:RefSeq peptide;Acc:NP_001288791]	PCAdmix_DOG
	ENSCAFG00000003758	PCDH18	PCDH18	19	4967933	4983273	1		PCDH18	protocadherin 18	protocadherin 18 [Source:HGNC Symbol;Acc:HGNC:14268]	PCAdmix_DOG
	ENSCAFG00000030512			19	6203568	6284042	1					PCAdmix_DOG
	ENSCAFG00000028734			19	7488761	7490889	-1					PCAdmix_DOG
	ENSCAFG00000003774			19	7908922	7909782	1					PCAdmix_DOG
	ENSCAFG00000003785		PCDH10	19	8712651	8731888	-1		PCDH10	protocadherin 10		PCAdmix_DOG
	ENSCAFG00000003799	C4orf33	C4orf33	19	11969864	12001210	-1		C19H4orf33	chromosome 19 open reading frame, human C4orf33	chromosome 4 open reading frame 33 [Source:HGNC Symbol;Acc:HGNC:27025]	PCAdmix_DOG
	ENSCAFG00000003801	SCLT1	SCLT1	19	12001293	12178960	1		SCLT1	sodium channel and clathrin linker 1	sodium channel and clathrin linker 1 [Source:HGNC Symbol;Acc:HGNC:26406]	PCAdmix_DOG
	ENSCAFG00000003808	JADE1	JADE1	19	12189394	12250368	-1		JADE1	jade family PHD finger 1	jade family PHD finger 1 [Source:HGNC Symbol;Acc:HGNC:30027]	PCAdmix_DOG
	ENSCAFG00000003988	SPATA5	SPATA5	19	17053625	17371523	-1		SPATA5	spermatogenesis associated 5	spermatogenesis associated 5 [Source:HGNC Symbol;Acc:HGNC:18119]	PCAdmix_DOG
	ENSCAFG00000003994		NUDT6	19	17371535	17402911	1		NUDT6	nudix (nucleoside diphosphate linked moiety X)-type motif 6		PCAdmix_DOG
	ENSCAFG00000003996	FGF2	FGF2	19	17403382	17463125	-1		FGF2	fibroblast growth factor 2 (basic)	fibroblast growth factor 2 [Source:HGNC Symbol;Acc:HGNC:3676]	PCAdmix_DOG
	ENSCAFG00000003998	BBS12	BBS12	19	17538346	17540487	-1		BBS12	Bardet-Biedl syndrome 12	Bardet-Biedl syndrome 12 [Source:HGNC Symbol;Acc:HGNC:26648]	PCAdmix_DOG
	ENSCAFG00000032088		LOC483842	19	17550019	17555753	1		LOC483842	centrin-4		PCAdmix_DOG
	ENSCAFG00000004004	IL21	IL21	19	17641833	17651289	1		IL21	interleukin 21	Interleukin-21 [Source:UniProtKB/Swiss-Prot;Acc:Q6L7I9]	PCAdmix_DOG
	ENSCAFG00000004008	IL2	IL2	19	17750780	17756394	1		IL2	interleukin 2	Interleukin-2 [Source:UniProtKB/Swiss-Prot;Acc:Q29416]	PCAdmix_DOG
	ENSCAFG00000004013	ADAD1	ADAD1	19	17785201	17826750	-1		ADAD1	adenosine deaminase domain containing 1 (testis-specific)	adenosine deaminase domain containing 1 [Source:HGNC Symbol;Acc:HGNC:30713]	PCAdmix_DOG
	ENSCAFG00000004022	KIAA1109	KIAA1109	19	17841265	18044276	-1		KIAA1109	KIAA1109 ortholog	KIAA1109 [Source:HGNC Symbol;Acc:HGNC:26953]	PCAdmix_DOG
	ENSCAFG00000024065		LOC609557	19	20348758	20384369	1		LOC609557	cryptic protein-like		PCAdmix_DOG
	ENSCAFG00000004206	AMER3	AMER3	19	20450384	20452993	1		AMER3	APC membrane recruitment protein 3	APC membrane recruitment protein 3 [Source:HGNC Symbol;Acc:HGNC:26771]	PCAdmix_DOG
	ENSCAFG00000004213	ARHGEF4	ARHGEF4	19	20634115	20732443	1				Rho guanine nucleotide exchange factor 4 [Source:HGNC Symbol;Acc:HGNC:684]	PCAdmix_DOG
	ENSCAFG00000004222	FAM168B	FAM168B	19	20739107	20775792	-1		FAM168B	family with sequence similarity 168, member B	family with sequence similarity 168 member B [Source:HGNC Symbol;Acc:HGNC:27016]	PCAdmix_DOG
	ENSCAFG00000004224	PLEKHB2	PLEKHB2	19	20809765	20847873	1		PLEKHB2	pleckstrin homology domain containing, family B (evectins) member 2	pleckstrin homology domain containing B2 [Source:HGNC Symbol;Acc:HGNC:19236]	PCAdmix_DOG
	ENSCAFG00000004355	LIMS2	LIMS2	19	22949982	22977354	1		LIMS2	LIM and senescent cell antigen-like domains 2	LIM zinc finger domain containing 2 [Source:HGNC Symbol;Acc:HGNC:16084]	PCAdmix_DOG
	ENSCAFG00000004362	GPR17	GPR17	19	22963363	22964382	-1		GPR17	G protein-coupled receptor 17	G protein-coupled receptor 17 [Source:HGNC Symbol;Acc:HGNC:4471]	PCAdmix_DOG
	ENSCAFG00000004404	MYO7B	MYO7B	19	22979381	23050834	-1		MYO7B	myosin VIIB	myosin VIIB [Source:HGNC Symbol;Acc:HGNC:7607]	PCAdmix_DOG
	ENSCAFG00000004475	IWS1	IWS1	19	23081833	23125302	1		IWS1	IWS1 homolog (S. cerevisiae)	IWS1, SUPT6H interacting protein [Source:HGNC Symbol;Acc:HGNC:25467]	PCAdmix_DOG
	ENSCAFG00000004493	PROC	PROC	19	23173626	23183563	-1		PROC	protein C (inactivator of coagulation factors Va and VIIIa)	Vitamin K-dependent protein C Vitamin K-dependent protein C light chain Vitamin K-dependent protein C heavy chain [Source:UniProtKB/Swiss-Prot;Acc:Q28278]	PCAdmix_DOG
	ENSCAFG00000032720			19	23206756	23207763	-1					PCAdmix_DOG
	ENSCAFG00000030572			19	23210069	23240962	1					PCAdmix_DOG
	ENSCAFG00000004528	MAP3K2	MAP3K2	19	23210069	23294586	1		MAP3K2	mitogen-activated protein kinase kinase kinase 2	mitogen-activated protein kinase kinase kinase 2 [Source:HGNC Symbol;Acc:HGNC:6854]	PCAdmix_DOG
	ENSCAFG00000004497	ERCC3	ERCC3	19	23311034	23337560	1		ERCC3	excision repair cross-complementation group 3	ERCC excision repair 3, TFIIH core complex helicase subunit [Source:HGNC Symbol;Acc:HGNC:3435]	PCAdmix_DOG
	ENSCAFG00000004542	CYP27C1	CYP27C1	19	23375348	23399773	1		CYP27C1	cytochrome P450, family 27, subfamily C, polypeptide 1	cytochrome P450 family 27 subfamily C member 1 [Source:HGNC Symbol;Acc:HGNC:33480]	PCAdmix_DOG
	ENSCAFG00000004606	BIN1	BIN1	19	23503647	23533936	1	Myopathy Great Dane	BIN1	bridging integrator 1	bridging integrator 1 [Source:HGNC Symbol;Acc:HGNC:1052]	PCAdmix_DOG
	ENSCAFG00000032263			19	23672263	23858422	-1					PCAdmix_DOG
	ENSCAFG00000030972	Gypc	Gypc	19	23943566	23988413	-1		GYPC	glycophorin C (Gerbich blood group)		PCAdmix_DOG
	ENSCAFG00000028785			19	24015109	24016450	-1					PCAdmix_DOG
	ENSCAFG00000004632			19	24467574	24468556	-1					PCAdmix_DOG
	ENSCAFG00000004640			19	25422742	25424131	1					PCAdmix_DOG
	ENSCAFG00000004650			19	25563874	25565174	1					PCAdmix_DOG
	ENSCAFG00000004689	CNTNAP5	CNTNAP5	19	25610573	26397947	-1		CNTNAP5	contactin associated protein-like 5	contactin-associated protein-like 5 precursor [Source:RefSeq peptide;Acc:NP_001041573]	PCAdmix_DOG
	ENSCAFG00000004700	TSN	TSN	19	28469474	28476358	-1		TSN	translin	translin [Source:HGNC Symbol;Acc:HGNC:12379]	PCAdmix_DOG
	ENSCAFG00000004710	NIFK	NIFK	19	28486116	28500059	1		NIFK	nucleolar protein interacting with the FHA domain of MKI67	nucleolar protein interacting with the FHA domain of MKI67 [Source:HGNC Symbol;Acc:HGNC:17838]	PCAdmix_DOG
	ENSCAFG00000004759	CLASP1	CLASP1	19	28595040	28830557	1		CLASP1	cytoplasmic linker associated protein 1	cytoplasmic linker associated protein 1 [Source:HGNC Symbol;Acc:HGNC:17088]	PCAdmix_DOG
	ENSCAFG00000004788	TFCP2L1	TFCP2L1	19	28869451	28922006	1		TFCP2L1	transcription factor CP2-like 1	transcription factor CP2-like 1 [Source:HGNC Symbol;Acc:HGNC:17925]	PCAdmix_DOG
	ENSCAFG00000004821	GLI2	GLI2	19	29130227	29383616	-1		GLI2	GLI family zinc finger 2	GLI family zinc finger 2 [Source:HGNC Symbol;Acc:HGNC:4318]	PCAdmix_DOG
	ENSCAFG00000004913	MARCO	MARCO	19	30996186	31034536	-1		MARCO	macrophage receptor with collagenous structure	macrophage receptor with collagenous structure [Source:HGNC Symbol;Acc:HGNC:6895]	PCAdmix_DOG
	ENSCAFG00000005003	NCKAP5	NCKAP5	19	35633416	36498816	-1		NCKAP5	NCK-associated protein 5	NCK associated protein 5 [Source:HGNC Symbol;Acc:HGNC:29847]	PCAdmix_DOG
	ENSCAFG00000005109	CXCR4	CXCR4	19	38873992	38877889	-1		CXCR4	chemokine (C-X-C motif) receptor 4	C-X-C chemokine receptor type 4 [Source:UniProtKB/Swiss-Prot;Acc:Q3LSL6]	PCAdmix_DOG
	ENSCAFG00000005188	SPOPL	SPOPL	19	41215831	41240803	1		SPOPL	speckle-type POZ protein-like	speckle type BTB/POZ protein like [Source:HGNC Symbol;Acc:HGNC:27934]	PCAdmix_DOG
	ENSCAFG00000005201	NXPH2	NXPH2	19	41318149	41318904	-1		NXPH2	neurexophilin 2	neurexophilin 2 [Source:HGNC Symbol;Acc:HGNC:8076]	PCAdmix_DOG
	ENSCAFG00000029252	RND3	RND3	19	51887486	51909239	-1		RND3	Rho family GTPase 3	Rho family GTPase 3 [Source:HGNC Symbol;Acc:HGNC:671]	PCAdmix_DOG
	ENSCAFG00000031551			19	51907049	51908616	1					PCAdmix_DOG
	ENSCAFG00000015626	NWD1	NWD1	20	45788769	45858714	-1		NWD1	NACHT and WD repeat domain containing 1	NACHT and WD repeat domain containing 1 [Source:HGNC Symbol;Acc:HGNC:27619]	PCAdmix_DOG
	ENSCAFG00000030694	TMEM38A	TMEM38A	20	45875601	45895326	-1		TMEM38A	transmembrane protein 38A	transmembrane protein 38A [Source:HGNC Symbol;Acc:HGNC:28462]	PCAdmix_DOG
	ENSCAFG00000015643		SMIM7	20	45896021	45901700	1		SMIM7	small integral membrane protein 7		PCAdmix_DOG
	ENSCAFG00000015648		MED26	20	45923231	45976021	1		MED26	mediator complex subunit 26		PCAdmix_DOG
	ENSCAFG00000015651	SLC35E1	SLC35E1	20	45979369	45996469	1		SLC35E1	solute carrier family 35, member E1	solute carrier family 35 member E1 [Source:HGNC Symbol;Acc:HGNC:20803]	PCAdmix_DOG
	ENSCAFG00000015671	CHERP	CHERP	20	46002661	46021887	1		CHERP	calcium homeostasis endoplasmic reticulum protein	calcium homeostasis endoplasmic reticulum protein [Source:HGNC Symbol;Acc:HGNC:16930]	PCAdmix_DOG
	ENSCAFG00000015691	C19orf44	C19orf44	20	46020253	46039367	-1		C20H19orf44	chromosome 20 open reading frame, human C19orf44	chromosome 19 open reading frame 44 [Source:HGNC Symbol;Acc:HGNC:26141]	PCAdmix_DOG
	ENSCAFG00000015694	CALR3	CALR3	20	46039180	46060731	1		CALR3	calreticulin 3	calreticulin 3 [Source:HGNC Symbol;Acc:HGNC:20407]	PCAdmix_DOG
	ENSCAFG00000015735	EPS15L1	EPS15L1	20	46064658	46165995	1		EPS15L1	epidermal growth factor receptor pathway substrate 15-like 1	epidermal growth factor receptor pathway substrate 15 like 1 [Source:HGNC Symbol;Acc:HGNC:24634]	PCAdmix_DOG
	ENSCAFG00000015762	AP1M1	AP1M1	20	46262667	46290346	-1		AP1M1	adaptor-related protein complex 1, mu 1 subunit	adaptor related protein complex 1 mu 1 subunit [Source:HGNC Symbol;Acc:HGNC:13667]	PCAdmix_DOG
	ENSCAFG00000015775	CIB3	CIB3	20	46312701	46318172	1		CIB3	calcium and integrin binding family member 3	calcium and integrin binding family member 3 [Source:HGNC Symbol;Acc:HGNC:24580]	PCAdmix_DOG
	ENSCAFG00000015778	HSH2D	HSH2D	20	46319343	46329695	-1		HSH2D	hematopoietic SH2 domain containing	hematopoietic SH2 domain containing [Source:HGNC Symbol;Acc:HGNC:24920]	PCAdmix_DOG
	ENSCAFG00000015782	RAB8A	RAB8A	20	46334601	46352314	-1	endocytic recycling	RAB8A	RAB8A, member RAS oncogene family	Ras-related protein Rab-8A [Source:UniProtKB/Swiss-Prot;Acc:P61007]	PCAdmix_DOG
	ENSCAFG00000015796	TPM4	TPM4	20	46356186	46376425	-1		TPM4	tropomyosin 4	tropomyosin 4 [Source:HGNC Symbol;Acc:HGNC:12013]	PCAdmix_DOG
	ENSCAFG00000028520		OR10A11	20	46391445	46392386	-1		OR10A11	olfactory receptor		PCAdmix_DOG
	ENSCAFG00000031088		OR18C09	20	46407857	46408798	-1		OR18C09	olfactory receptor		PCAdmix_DOG
	ENSCAFG00000028658		LOC484862	20	46543267	46544217	1		LOC484862	olfactory receptor 10H1-like		PCAdmix_DOG
	ENSCAFG00000015833		cOR10H13	20	46558127	46559723	-1		cOR10H13	cOR10H13 olfactory receptor family 10 subfamily H-like		PCAdmix_DOG
	ENSCAFG00000030089			20	46583986	46588842	-1					PCAdmix_DOG
	ENSCAFG00000023401	CYP4F3	CYP4F3	20	46611481	46631393	-1		LOC484867	docosahexaenoic acid omega-hydroxylase CYP4F3	cytochrome P450 family 4 subfamily F member 3 [Source:HGNC Symbol;Acc:HGNC:2646]	PCAdmix_DOG
	ENSCAFG00000015931	CYP4F8	CYP4F8	20	46646549	46663727	-1		LOC484867	docosahexaenoic acid omega-hydroxylase CYP4F3	cytochrome P450 family 4 subfamily F member 8 [Source:HGNC Symbol;Acc:HGNC:2648]	PCAdmix_DOG
	ENSCAFG00000023053	CYP4F22	CYP4F22	20	46674180	46694052	-1		CYP4F22	cytochrome P450, family 4, subfamily F, polypeptide 22	cytochrome P450 family 4 subfamily F member 22 [Source:HGNC Symbol;Acc:HGNC:26820]	PCAdmix_DOG
	ENSCAFG00000015962	PGLYRP2	PGLYRP2	20	46724811	46730985	1		PGLYRP2	peptidoglycan recognition protein 2	peptidoglycan recognition protein 2 [Source:HGNC Symbol;Acc:HGNC:30013]	PCAdmix_DOG
	ENSCAFG00000015976	RASAL3	RASAL3	20	46732537	46744604	1		RASAL3	RAS protein activator like 3	RAS protein activator like 3 [Source:HGNC Symbol;Acc:HGNC:26129]	PCAdmix_DOG
	ENSCAFG00000016006		WIZ	20	46746438	46769926	1		WIZ	widely interspaced zinc finger motifs		PCAdmix_DOG
	ENSCAFG00000016050	AKAP8L	AKAP8L	20	46773530	46800467	1		AKAP8L	A kinase (PRKA) anchor protein 8-like	A-kinase anchoring protein 8 like [Source:HGNC Symbol;Acc:HGNC:29857]	PCAdmix_DOG
	ENSCAFG00000031847			20	46800518	46801930	-1					PCAdmix_DOG
	ENSCAFG00000016083	AKAP8	AKAP8	20	46800917	46817397	1		AKAP8	A kinase (PRKA) anchor protein 8	A-kinase anchoring protein 8 [Source:HGNC Symbol;Acc:HGNC:378]	PCAdmix_DOG
	ENSCAFG00000016085	BRD4	BRD4	20	46891540	46927604	1		BRD4	bromodomain containing 4	bromodomain containing 4 [Source:HGNC Symbol;Acc:HGNC:13575]	PCAdmix_DOG
	ENSCAFG00000016107	NOTCH3	NOTCH3	20	46946483	46978119	1		NOTCH3	notch 3	notch 3 [Source:HGNC Symbol;Acc:HGNC:7883]	PCAdmix_DOG
	ENSCAFG00000016130	ILVBL	ILVBL	20	47012575	47023348	1		ILVBL	ilvB (bacterial acetolactate synthase)-like	ilvB (bacterial acetolactate synthase)-like [Source:HGNC Symbol;Acc:HGNC:6041]	PCAdmix_DOG
	ENSCAFG00000016147	SYDE1	SYDE1	20	47022811	47028605	-1		SYDE1	synapse defective 1, Rho GTPase, homolog 1 (C. elegans)	synapse defective Rho GTPase homolog 1 [Source:HGNC Symbol;Acc:HGNC:25824]	PCAdmix_DOG
	ENSCAFG00000016159	CASP14	CASP14	20	47062281	47067001	-1		CASP14	caspase 14, apoptosis-related cysteine peptidase	caspase 14 [Source:HGNC Symbol;Acc:HGNC:1502]	PCAdmix_DOG
	ENSCAFG00000016174	SLC1A6	SLC1A6	20	47097635	47144550	1		SLC1A6	solute carrier family 1 (high affinity aspartate/glutamate transporter), member 6	solute carrier family 1 member 6 [Source:HGNC Symbol;Acc:HGNC:10944]	PCAdmix_DOG
	ENSCAFG00000016167	CCDC105	CCDC105	20	47097910	47104995	-1		CCDC105	coiled-coil domain containing 105	coiled-coil domain containing 105 [Source:HGNC Symbol;Acc:HGNC:26866]	PCAdmix_DOG
	ENSCAFG00000030505		OR7C2	20	47145651	47146610	-1		OR7C2	olfactory receptor, family 7, subfamily C, member 2		PCAdmix_DOG
	ENSCAFG00000003978	PGR	PGR	21	447197	552511	1		PGR	progesterone receptor	progesterone receptor [Source:RefSeq peptide;Acc:NP_001003074]	PCAdmix_DOG
	ENSCAFG00000003991	ARHGAP42	ARHGAP42	21	596944	820680	-1		ARHGAP42	Rho GTPase activating protein 42	Rho GTPase activating protein 42 [Source:HGNC Symbol;Acc:HGNC:26545]	PCAdmix_DOG
	ENSCAFG00000004018	CNTN5	CNTN5	21	1128048	1614989	-1		CNTN5	contactin 5	contactin 5 [Source:HGNC Symbol;Acc:HGNC:2175]	PCAdmix_DOG
	ENSCAFG00000004203	VSTM5	VSTM5	21	6928874	6958533	1		VSTM5	V-set and transmembrane domain containing 5	V-set and transmembrane domain containing 5 [Source:HGNC Symbol;Acc:HGNC:34443]	PCAdmix_DOG
	ENSCAFG00000004211	MED17	MED17	21	6966095	6991252	-1		MED17	mediator complex subunit 17	mediator complex subunit 17 [Source:HGNC Symbol;Acc:HGNC:2375]	PCAdmix_DOG
	ENSCAFG00000004225	C11orf54	C11orf54	21	6992255	7009700	-1		C21H11orf54	chromosome 21 open reading frame, human C11orf54	chromosome 11 open reading frame 54 [Source:HGNC Symbol;Acc:HGNC:30204]	PCAdmix_DOG
	ENSCAFG00000004233			21	7015042	7018238	1					PCAdmix_DOG
	ENSCAFG00000004234	CEP295	CEP295	21	7023600	7076376	-1		CEP295	centrosomal protein 295kDa	centrosomal protein 295 [Source:HGNC Symbol;Acc:HGNC:29366]	PCAdmix_DOG
	ENSCAFG00000029851			21	7192794	7229034	1					PCAdmix_DOG
	ENSCAFG00000004239	CCDC67	CCDC67	21	7252217	7334230	-1		CCDC67	coiled-coil domain containing 67	coiled-coil domain containing 67 [Source:HGNC Symbol;Acc:HGNC:26344]	PCAdmix_DOG
	ENSCAFG00000004243	SLC36A4	SLC36A4	21	7471482	7523715	1		SLC36A4	solute carrier family 36 (proton/amino acid symporter), member 4	solute carrier family 36 member 4 [Source:HGNC Symbol;Acc:HGNC:19660]	PCAdmix_DOG
	ENSCAFG00000004246	MTNR1B	MTNR1B	21	7640350	7641498	-1				melatonin receptor 1B [Source:HGNC Symbol;Acc:HGNC:7464]	PCAdmix_DOG
	ENSCAFG00000024099	FAT3	FAT3	21	7713173	8213266	-1		FAT3	FAT atypical cadherin 3	FAT atypical cadherin 3 [Source:HGNC Symbol;Acc:HGNC:23112]	PCAdmix_DOG
	ENSCAFG00000008336		LOC106557831	21	7927729	7928775	1		LOC106557831	40S ribosomal protein S24-like		PCAdmix_DOG
	ENSCAFG00000029498	FANCF	FANCF	21	44255250	44256234	-1		FANCF	Fanconi anemia, complementation group F	Fanconi anemia complementation group F [Source:HGNC Symbol;Acc:HGNC:3587]	PCAdmix_DOG
	ENSCAFG00000010113	GAS2	GAS2	21	44279613	44404761	1		GAS2	growth arrest-specific 2	growth arrest specific 2 [Source:HGNC Symbol;Acc:HGNC:4167]	PCAdmix_DOG
	ENSCAFG00000030945			21	44358951	44542385	1					PCAdmix_DOG
	ENSCAFG00000032736	SVIP	SVIP	21	44415093	44415738	-1				small VCP/p97-interacting protein [Source:HGNC Symbol;Acc:HGNC:25238]	PCAdmix_DOG
	ENSCAFG00000032293	CCDC179	CCDC179	21	44427462	44440917	-1		CCDC179	coiled-coil domain containing 179	coiled-coil domain containing 179 [Source:HGNC Symbol;Acc:HGNC:44653]	PCAdmix_DOG
	ENSCAFG00000005319			22	44701396	44893951	1					PCAdmix_DOG
	ENSCAFG00000030307			22	45131925	45238143	1					PCAdmix_DOG
	ENSCAFG00000005323	DCT	DCT	22	45271735	45305188	-1		DCT	dopachrome tautomerase	Canis lupus familiaris dopachrome tautomerase (DCT), mRNA. [Source:RefSeq mRNA;Acc:NM_001284466]	PCAdmix_DOG
	ENSCAFG00000005327	TGDS	TGDS	22	45384052	45400154	-1		TGDS	TDP-glucose 4,6-dehydratase	TDP-glucose 4,6-dehydratase [Source:HGNC Symbol;Acc:HGNC:20324]	PCAdmix_DOG
	ENSCAFG00000005334	GPR180	GPR180	22	45401656	45431483	1				G protein-coupled receptor 180 [Source:HGNC Symbol;Acc:HGNC:28899]	PCAdmix_DOG
	ENSCAFG00000028798			22	45508510	45508881	-1					PCAdmix_DOG
	ENSCAFG00000005433	ABCC4	ABCC4	22	45765368	46013484	-1		ABCC4	ATP-binding cassette, sub-family C (CFTR/MRP), member 4	ATP binding cassette subfamily C member 4 [Source:HGNC Symbol;Acc:HGNC:55]	PCAdmix_DOG
	ENSCAFG00000025482			22	46091770	46092397	-1					PCAdmix_DOG
	ENSCAFG00000005458	CLDN10	CLDN10	22	46198911	46225152	1		CLDN10	claudin 10	claudin 10 [Source:HGNC Symbol;Acc:HGNC:2033]	PCAdmix_DOG
	ENSCAFG00000005465	DZIP1	DZIP1	22	46227223	46279102	-1		DZIP1	DAZ interacting zinc finger protein 1	zinc finger protein DZIP1 [Source:RefSeq peptide;Acc:NP_001159480]	PCAdmix_DOG
	ENSCAFG00000005471			22	46289291	46290420	-1					PCAdmix_DOG
	ENSCAFG00000005480	DNAJC3	DNAJC3	22	46307597	46402236	1		DNAJC3	DnaJ (Hsp40) homolog, subfamily C, member 3	DnaJ heat shock protein family (Hsp40) member C3 [Source:HGNC Symbol;Acc:HGNC:9439]	PCAdmix_DOG
	ENSCAFG00000005500	UGGT2	UGGT2	22	46407540	46591371	-1		UGGT2	UDP-glucose glycoprotein glucosyltransferase 2	UDP-glucose glycoprotein glucosyltransferase 2 [Source:HGNC Symbol;Acc:HGNC:15664]	PCAdmix_DOG
	ENSCAFG00000006062	COL4A1	COL4A1	22	58512484	58588734	-1				collagen type IV alpha 1 chain [Source:HGNC Symbol;Acc:HGNC:2202]	PCAdmix_DOG
	ENSCAFG00000006069	COL4A2	COL4A2	22	58697166	58946371	1				collagen type IV alpha 2 [Source:HGNC Symbol;Acc:HGNC:2203]	PCAdmix_DOG
	ENSCAFG00000006072	RAB20	RAB20	22	58825106	58853941	-1		RAB20	RAB20, member RAS oncogene family	RAB20, member RAS oncogene family [Source:HGNC Symbol;Acc:HGNC:18260]	PCAdmix_DOG
	ENSCAFG00000006076	NAXD	NAXD	22	58881934	58900272	1				NAD(P)HX dehydratase [Source:HGNC Symbol;Acc:HGNC:25576]	PCAdmix_DOG
	ENSCAFG00000006082	CARS2	CARS2	22	58902357	58946235	-1		CARS2	cysteinyl-tRNA synthetase 2, mitochondrial (putative)	cysteinyl-tRNA synthetase 2, mitochondrial (putative) [Source:HGNC Symbol;Acc:HGNC:25695]	PCAdmix_DOG
	ENSCAFG00000006095	ANKRD10	ANKRD10	22	59059277	59092291	-1		ANKRD10	ankyrin repeat domain 10	ankyrin repeat domain 10 [Source:HGNC Symbol;Acc:HGNC:20265]	PCAdmix_DOG
	ENSCAFG00000030414			22	59203134	59204156	-1					PCAdmix_DOG
	ENSCAFG00000006116	ARHGEF7	ARHGEF7	22	59233491	59302771	1		ARHGEF7	Rho guanine nucleotide exchange factor (GEF) 7	Rho guanine nucleotide exchange factor 7 [Source:HGNC Symbol;Acc:HGNC:15607]	PCAdmix_DOG
	ENSCAFG00000023644	TEX29	TEX29	22	59309725	59326203	1		TEX29	testis expressed 29	testis expressed 29 [Source:HGNC Symbol;Acc:HGNC:20370]	PCAdmix_DOG
	ENSCAFG00000031412		SPACA7	22	60089146	60137976	1		SPACA7	sperm acrosome associated 7		PCAdmix_DOG
	ENSCAFG00000006143	TUBGCP3	TUBGCP3	22	60162187	60237819	-1		TUBGCP3	tubulin, gamma complex associated protein 3	tubulin gamma complex associated protein 3 [Source:HGNC Symbol;Acc:HGNC:18598]	PCAdmix_DOG
	ENSCAFG00000031472			22	60237101	60238222	1					PCAdmix_DOG
	ENSCAFG00000006199	ATP11A	ATP11A	22	60301883	60431243	1		ATP11A	ATPase, class VI, type 11A	ATPase phospholipid transporting 11A [Source:HGNC Symbol;Acc:HGNC:13552]	PCAdmix_DOG
	ENSCAFG00000006240	MCF2L	MCF2L	22	60474400	60570926	1		MCF2L	MCF.2 cell line derived transforming sequence-like	MCF.2 cell line derived transforming sequence like [Source:HGNC Symbol;Acc:HGNC:14576]	PCAdmix_DOG
	ENSCAFG00000006257	F7	F7	22	60572511	60582729	1	Factor VII deficiency	F7	coagulation factor VII (serum prothrombin conversion accelerator)	coagulation factor VII [Source:HGNC Symbol;Acc:HGNC:3544]	PCAdmix_DOG
	ENSCAFG00000006258	F10	F10	22	60585600	60596983	1		F10	coagulation factor X	coagulation factor X [Source:HGNC Symbol;Acc:HGNC:3528]	PCAdmix_DOG
	ENSCAFG00000006269	PCID2	PCID2	22	60600039	60623699	-1		PCID2	PCI domain containing 2	PCI domain containing 2 [Source:HGNC Symbol;Acc:HGNC:25653]	PCAdmix_DOG
	ENSCAFG00000006290	CUL4A	CUL4A	22	60624241	60666317	1		CUL4A	cullin 4A	cullin 4A [Source:HGNC Symbol;Acc:HGNC:2554]	PCAdmix_DOG
	ENSCAFG00000006323	LAMP1	LAMP1	22	60678317	60694767	1		LAMP1	lysosomal-associated membrane protein 1	lysosomal associated membrane protein 1 [Source:HGNC Symbol;Acc:HGNC:6499]	PCAdmix_DOG
	ENSCAFG00000006334	GRTP1	GRTP1	22	60697016	60713255	-1		GRTP1	growth hormone regulated TBC protein 1	growth hormone regulated TBC protein 1 [Source:HGNC Symbol;Acc:HGNC:20310]	PCAdmix_DOG
	ENSCAFG00000030085			22	60717037	60748920	-1					PCAdmix_DOG
	ENSCAFG00000006359	DCUN1D2	DCUN1D2	22	60752421	60778378	-1				defective in cullin neddylation 1 domain containing 2 [Source:HGNC Symbol;Acc:HGNC:20328]	PCAdmix_DOG
	ENSCAFG00000029554			22	60783989	60785179	1					PCAdmix_DOG
	ENSCAFG00000006372	TMCO3	TMCO3	22	60786583	60833022	1		TMCO3	transmembrane and coiled-coil domains 3	transmembrane and coiled-coil domains 3 [Source:HGNC Symbol;Acc:HGNC:20329]	PCAdmix_DOG
	ENSCAFG00000006384		TFDP1	22	60870413	60897527	1		TFDP1	transcription factor Dp-1		PCAdmix_DOG
	ENSCAFG00000006390	ATP4B	ATP4B	22	60898870	60904185	-1		ATP4B	ATPase, H+/K+ exchanging, beta polypeptide	potassium-transporting ATPase subunit beta [Source:RefSeq peptide;Acc:NP_001003328]	PCAdmix_DOG
	ENSCAFG00000006393	GRK1	GRK1	22	60911953	60926146	1		GRK1	G protein-coupled receptor kinase 1	G protein-coupled receptor kinase 1 [Source:HGNC Symbol;Acc:HGNC:10013]	PCAdmix_DOG
	ENSCAFG00000032408	TMEM255B	TMEM255B	22	60937077	60981922	1				transmembrane protein 255B [Source:HGNC Symbol;Acc:HGNC:28297]	PCAdmix_DOG
	ENSCAFG00000006421	GAS6	GAS6	22	60975487	61005869	-1		GAS6	growth arrest-specific 6	growth arrest specific 6 [Source:HGNC Symbol;Acc:HGNC:4168]	PCAdmix_DOG
	ENSCAFG00000006449		LOC106557589	22	61082691	61091041	-1		LOC106557589	uncharacterized LOC106557589		PCAdmix_DOG
	ENSCAFG00000006458	RASA3	RASA3	22	61094914	61202106	-1		RASA3	RAS p21 protein activator 3	RAS p21 protein activator 3 [Source:HGNC Symbol;Acc:HGNC:20331]	PCAdmix_DOG
	ENSCAFG00000030915			22	61163002	61163712	1					PCAdmix_DOG
	ENSCAFG00000030364			22	61243579	61262052	1					PCAdmix_DOG
	ENSCAFG00000029057			22	61281909	61312285	-1					PCAdmix_DOG
	ENSCAFG00000006493	CDC16	CDC16	22	61283365	61312062	1		CDC16	cell division cycle 16	cell division cycle 16 [Source:HGNC Symbol;Acc:HGNC:1720]	PCAdmix_DOG
	ENSCAFG00000006504	UPF3A	UPF3A	22	61320622	61345511	1		UPF3A	UPF3 regulator of nonsense transcripts homolog A (yeast)	UPF3 regulator of nonsense transcripts homolog A (yeast) [Source:HGNC Symbol;Acc:HGNC:20332]	PCAdmix_DOG
	ENSCAFG00000006507	CHAMP1	CHAMP1	22	61368052	61370523	-1		CHAMP1	chromosome alignment maintaining phosphoprotein 1	chromosome alignment maintaining phosphoprotein 1 [Source:HGNC Symbol;Acc:HGNC:20311]	PCAdmix_DOG
	ENSCAFG00000005607	SPTLC3	SPTLC3	24	9446023	9597602	-1		SPTLC3	serine palmitoyltransferase, long chain base subunit 3	serine palmitoyltransferase long chain base subunit 3 [Source:HGNC Symbol;Acc:HGNC:16253]	PCAdmix_DOG
	ENSCAFG00000005615			24	10737583	10738011	1					PCAdmix_DOG
	ENSCAFG00000032703			24	11655587	11660100	-1					PCAdmix_DOG
	ENSCAFG00000032673			24	11655717	11657072	1					PCAdmix_DOG
	ENSCAFG00000005627	JAG1	JAG1	24	11657442	11694554	1		JAG1	jagged 1	jagged 1 [Source:HGNC Symbol;Acc:HGNC:6188]	PCAdmix_DOG
	ENSCAFG00000025077			24	11707743	11869016	-1					PCAdmix_DOG
	ENSCAFG00000005645			24	11738322	11745072	1					PCAdmix_DOG
	ENSCAFG00000005651	MKKS	MKKS	24	11900097	11913740	1		MKKS	McKusick-Kaufman syndrome	McKusick-Kaufman syndrome [Source:HGNC Symbol;Acc:HGNC:7108]	PCAdmix_DOG
	ENSCAFG00000005662	SNAP25	SNAP25	24	12004233	12028750	-1		SNAP25	synaptosomal-associated protein, 25kDa	synaptosome associated protein 25 [Source:HGNC Symbol;Acc:HGNC:11132]	PCAdmix_DOG
	ENSCAFG00000005668	ANKEF1	ANKEF1	24	12235718	12259872	-1		ANKEF1	ankyrin repeat and EF-hand domain containing 1	ankyrin repeat and EF-hand domain containing 1 [Source:HGNC Symbol;Acc:HGNC:15803]	PCAdmix_DOG
	ENSCAFG00000005685	PAK5	PAK5	24	12391558	12671483	1		PAK7	p21 protein (Cdc42/Rac)-activated kinase 7	p21 (RAC1) activated kinase 5 [Source:HGNC Symbol;Acc:HGNC:15916]	PCAdmix_DOG
	ENSCAFG00000005690	LAMP5	LAMP5	24	12679192	12693729	-1		LAMP5	lysosomal-associated membrane protein family, member 5	lysosomal associated membrane protein family member 5 [Source:HGNC Symbol;Acc:HGNC:16097]	PCAdmix_DOG
	ENSCAFG00000005760	PLCB4	PLCB4	24	12750503	13008097	-1		PLCB4	phospholipase C, beta 4	phospholipase C beta 4 [Source:HGNC Symbol;Acc:HGNC:9059]	PCAdmix_DOG
	ENSCAFG00000005856	PLCB1	PLCB1	24	13337234	13587167	-1		PLCB1	phospholipase C, beta 1 (phosphoinositide-specific)	phospholipase C beta 1 [Source:HGNC Symbol;Acc:HGNC:15917]	PCAdmix_DOG
	ENSCAFG00000031497	BMP2	BMP2	24	15197393	15212239	-1		BMP2	bone morphogenetic protein 2	bone morphogenetic protein 2 [Source:HGNC Symbol;Acc:HGNC:1069]	PCAdmix_DOG
	ENSCAFG00000005917	FERMT1	FERMT1	24	15748630	15782880	1		FERMT1	fermitin family member 1	fermitin family member 1 [Source:HGNC Symbol;Acc:HGNC:15889]	PCAdmix_DOG
	ENSCAFG00000024978	LRRN4	LRRN4	24	15803125	15810930	1		LRRN4	leucine rich repeat neuronal 4	leucine rich repeat neuronal 4 [Source:HGNC Symbol;Acc:HGNC:16208]	PCAdmix_DOG
	ENSCAFG00000005934	CRLS1	CRLS1	24	15814993	15838210	-1		CRLS1	cardiolipin synthase 1	cardiolipin synthase 1 [Source:HGNC Symbol;Acc:HGNC:16148]	PCAdmix_DOG
	ENSCAFG00000005951	MCM8	MCM8	24	15850843	15893458	-1		MCM8	minichromosome maintenance 8 homologous recombination repair factor	minichromosome maintenance 8 homologous recombination repair factor [Source:HGNC Symbol;Acc:HGNC:16147]	PCAdmix_DOG
	ENSCAFG00000005993	C20orf196	C20orf196	24	15957746	16037281	-1		C24H20orf196	chromosome 24 open reading frame, human C20orf196	chromosome 20 open reading frame 196 [Source:HGNC Symbol;Acc:HGNC:26318]	PCAdmix_DOG
	ENSCAFG00000006063	PRND	PRND	24	16825655	16826191	-1		PRND	prion protein 2 (dublet)	prion protein 2 (dublet) [Source:HGNC Symbol;Acc:HGNC:15748]	PCAdmix_DOG
	ENSCAFG00000006065	PRNP	PRNP	24	16846859	16847632	-1		PRNP	prion protein	prion protein [Source:HGNC Symbol;Acc:HGNC:9449]	PCAdmix_DOG
	ENSCAFG00000006068	ADRA1D	ADRA1D	24	17213643	17214755	1		ADRA1D	adrenoceptor alpha 1D	adrenoceptor alpha 1D [Source:HGNC Symbol;Acc:HGNC:280]	PCAdmix_DOG
	ENSCAFG00000006089	SMOX	SMOX	24	17252856	17285162	-1		SMOX	spermine oxidase	spermine oxidase [Source:HGNC Symbol;Acc:HGNC:15862]	PCAdmix_DOG
	ENSCAFG00000006150	PANK2	PANK2	24	17463603	17489677	-1				pantothenate kinase 2 [Source:HGNC Symbol;Acc:HGNC:15894]	PCAdmix_DOG
	ENSCAFG00000006157	MAVS	MAVS	24	17512761	17529176	-1		MAVS	mitochondrial antiviral signaling protein	mitochondrial antiviral signaling protein [Source:HGNC Symbol;Acc:HGNC:29233]	PCAdmix_DOG
	ENSCAFG00000006159	AP5S1	AP5S1	24	17540368	17543848	-1		AP5S1	adaptor-related protein complex 5, sigma 1 subunit	adaptor related protein complex 5 sigma 1 subunit [Source:HGNC Symbol;Acc:HGNC:15875]	PCAdmix_DOG
	ENSCAFG00000006234	ADAM33	ADAM33	24	17552937	17681516	1		ADAM33	ADAM metallopeptidase domain 33	ADAM metallopeptidase domain 33 [Source:HGNC Symbol;Acc:HGNC:15478]	PCAdmix_DOG
	ENSCAFG00000006175	CDC25B	CDC25B	24	17553401	17561759	-1		CDC25B	cell division cycle 25B	cell division cycle 25B [Source:HGNC Symbol;Acc:HGNC:1726]	PCAdmix_DOG
	ENSCAFG00000006190	SPEF1	SPEF1	24	17574741	17577827	1		SPEF1	sperm flagellar 1	sperm flagellar 1 [Source:HGNC Symbol;Acc:HGNC:15874]	PCAdmix_DOG
	ENSCAFG00000006219	SIGLEC1	SIGLEC1	24	17586743	17659907	1		SIGLEC1	sialic acid binding Ig-like lectin 1, sialoadhesin	sialic acid binding Ig like lectin 1 [Source:HGNC Symbol;Acc:HGNC:11127]	PCAdmix_DOG
	ENSCAFG00000006209	HSPA12B	HSPA12B	24	17601462	17619908	-1		HSPA12B	heat shock 70kD protein 12B	heat shock protein family A (Hsp70) member 12B [Source:HGNC Symbol;Acc:HGNC:16193]	PCAdmix_DOG
	ENSCAFG00000030551			24	17668065	17669120	-1					PCAdmix_DOG
	ENSCAFG00000006246	GFRA4	GFRA4	24	17688206	17690085	1				GDNF family receptor alpha 4 [Source:HGNC Symbol;Acc:HGNC:13821]	PCAdmix_DOG
	ENSCAFG00000006278	ATRN	ATRN	24	17700272	17859737	-1		ATRN	attractin	attractin [Source:HGNC Symbol;Acc:HGNC:885]	PCAdmix_DOG
	ENSCAFG00000006374	C20orf194	C20orf194	24	17908741	18046740	1		C24H20orf194	chromosome 24 open reading frame, human C20orf194	chromosome 20 open reading frame 194 [Source:HGNC Symbol;Acc:HGNC:17721]	PCAdmix_DOG
	ENSCAFG00000006389	SLC4A11	SLC4A11	24	18058640	18071870	1		SLC4A11	solute carrier family 4, sodium borate transporter, member 11	solute carrier family 4 member 11 [Source:HGNC Symbol;Acc:HGNC:16438]	PCAdmix_DOG
	ENSCAFG00000031613	ITPA	ITPA	24	18062945	18082163	-1		ITPA	inosine triphosphatase (nucleoside triphosphate pyrophosphatase)	inosine triphosphatase [Source:HGNC Symbol;Acc:HGNC:6176]	PCAdmix_DOG
	ENSCAFG00000006407	DDRGK1	DDRGK1	24	18085723	18099344	1				DDRGK domain containing 1 [Source:HGNC Symbol;Acc:HGNC:16110]	PCAdmix_DOG
	ENSCAFG00000006417		PROSAPIP1	24	18116989	18120428	1		PROSAPIP1	ProSAPiP1 protein		PCAdmix_DOG
	ENSCAFG00000024131	FASTKD5	FASTKD5	24	18133891	18136167	1		FASTKD5	FAST kinase domains 5	FAST kinase domains 5 [Source:HGNC Symbol;Acc:HGNC:25790]	PCAdmix_DOG
	ENSCAFG00000006425	UBOX5	UBOX5	24	18157429	18166545	1		UBOX5	U-box domain containing 5	U-box domain containing 5 [Source:HGNC Symbol;Acc:HGNC:17777]	PCAdmix_DOG
	ENSCAFG00000006432	AVP	AVP	24	18182856	18184869	1		AVP	arginine vasopressin	arginine vasopressin [Source:HGNC Symbol;Acc:HGNC:894]	PCAdmix_DOG
	ENSCAFG00000006437	OXT	OXT	24	18193429	18194002	-1				oxytocin/neurophysin I prepropeptide [Source:HGNC Symbol;Acc:HGNC:8528]	PCAdmix_DOG
	ENSCAFG00000006438	MRPS26	MRPS26	24	18215447	18216958	-1		MRPS26	mitochondrial ribosomal protein S26	mitochondrial ribosomal protein S26 [Source:HGNC Symbol;Acc:HGNC:14045]	PCAdmix_DOG
	ENSCAFG00000006460	PTPRA	PTPRA	24	18224919	18296350	-1		PTPRA	protein tyrosine phosphatase, receptor type, A	protein tyrosine phosphatase, receptor type A [Source:HGNC Symbol;Acc:HGNC:9664]	PCAdmix_DOG
	ENSCAFG00000006534	VPS16	VPS16	24	18399511	18424510	-1		VPS16	vacuolar protein sorting 16 homolog (S. cerevisiae)	VPS16, CORVET/HOPS core subunit [Source:HGNC Symbol;Acc:HGNC:14584]	PCAdmix_DOG
	ENSCAFG00000006588	PCED1A	PCED1A	24	18425381	18432612	1		PCED1A	PC-esterase domain containing 1A	PC-esterase domain containing 1A [Source:HGNC Symbol;Acc:HGNC:16212]	PCAdmix_DOG
	ENSCAFG00000006599	TMEM239	TMEM239	24	18444918	18446379	-1				transmembrane protein 239 [Source:HGNC Symbol;Acc:HGNC:40044]	PCAdmix_DOG
	ENSCAFG00000031835		C24H20orf141	24	18446145	18446744	-1		C24H20orf141	chromosome 24 open reading frame, human C20orf141		PCAdmix_DOG
	ENSCAFG00000006608	CPXM1	CPXM1	24	18453942	18460232	1		CPXM1	carboxypeptidase X (M14 family), member 1	carboxypeptidase X (M14 family), member 1 [Source:HGNC Symbol;Acc:HGNC:15771]	PCAdmix_DOG
	ENSCAFG00000006631	EBF4	EBF4	24	18470957	18528305	-1		EBF4	early B-cell factor 4	early B-cell factor 4 [Source:HGNC Symbol;Acc:HGNC:29278]	PCAdmix_DOG
	ENSCAFG00000006639		IDH3B	24	18556266	18561336	1		IDH3B	isocitrate dehydrogenase 3 (NAD+) beta		PCAdmix_DOG
	ENSCAFG00000006651	NOP56	NOP56	24	18561487	18567440	-1		NOP56	NOP56 ribonucleoprotein	NOP56 ribonucleoprotein [Source:HGNC Symbol;Acc:HGNC:15911]	PCAdmix_DOG
	ENSCAFG00000006675	TMC2	TMC2	24	18577260	18631541	-1		TMC2	transmembrane channel-like 2	transmembrane channel like 2 [Source:HGNC Symbol;Acc:HGNC:16527]	PCAdmix_DOG
	ENSCAFG00000006693		SNRPB	24	18673625	18683317	1		SNRPB	small nuclear ribonucleoprotein polypeptides B and B1		PCAdmix_DOG
	ENSCAFG00000006727	TGM6	TGM6	24	18700293	18712993	-1		TGM6	transglutaminase 6	transglutaminase 6 [Source:HGNC Symbol;Acc:HGNC:16255]	PCAdmix_DOG
	ENSCAFG00000023828	TGM3	TGM3	24	18753594	18782729	-1		TGM3	transglutaminase 3	transglutaminase 3 [Source:HGNC Symbol;Acc:HGNC:11779]	PCAdmix_DOG
	ENSCAFG00000006744	STK35	STK35	24	18913691	18958221	-1		STK35	serine/threonine kinase 35	serine/threonine kinase 35 [Source:HGNC Symbol;Acc:HGNC:16254]	PCAdmix_DOG
	ENSCAFG00000006748	PDYN	PDYN	24	19053870	19057678	1		PDYN	prodynorphin	prodynorphin [Source:HGNC Symbol;Acc:HGNC:8820]	PCAdmix_DOG
	ENSCAFG00000025524		LOC609452	24	19097392	19135461	-1		LOC609452	tyrosine-protein phosphatase non-receptor type substrate 1		PCAdmix_DOG
	ENSCAFG00000015593			24	19524893	19544939	1					PCAdmix_DOG
	ENSCAFG00000029125	SIRPB2	SIRPB2	24	19556653	19573560	1		LOC485810	signal-regulatory protein beta-2	signal regulatory protein beta 2 [Source:HGNC Symbol;Acc:HGNC:16247]	PCAdmix_DOG
	ENSCAFG00000006789	NSFL1C	NSFL1C	24	19574924	19617964	1		NSFL1C	NSFL1 (p97) cofactor (p47)	NSFL1 cofactor [Source:HGNC Symbol;Acc:HGNC:15912]	PCAdmix_DOG
	ENSCAFG00000006795			24	19637503	19640623	1					PCAdmix_DOG
	ENSCAFG00000006811	SDCBP2	SDCBP2	24	19686909	19695543	1		SDCBP2	syndecan binding protein (syntenin) 2	syndecan binding protein 2 [Source:HGNC Symbol;Acc:HGNC:15756]	PCAdmix_DOG
	ENSCAFG00000006822	SNPH	SNPH	24	19699792	19733771	-1		SNPH	syntaphilin	syntaphilin [Source:HGNC Symbol;Acc:HGNC:15931]	PCAdmix_DOG
	ENSCAFG00000006827	RAD21L1	RAD21L1	24	19742675	19769651	-1		RAD21L1	RAD21 cohesin complex component like 1	RAD21 cohesin complex component like 1 [Source:HGNC Symbol;Acc:HGNC:16271]	PCAdmix_DOG
	ENSCAFG00000006829	TMEM74B	TMEM74B	24	19804129	19806879	1				transmembrane protein 74B [Source:HGNC Symbol;Acc:HGNC:15893]	PCAdmix_DOG
	ENSCAFG00000006834	PSMF1	PSMF1	24	19820067	19859492	-1		PSMF1	proteasome inhibitor subunit 1	proteasome inhibitor subunit 1 [Source:HGNC Symbol;Acc:HGNC:9571]	PCAdmix_DOG
	ENSCAFG00000006836	RSPO4	RSPO4	24	19981734	19987498	1				R-spondin 4 [Source:HGNC Symbol;Acc:HGNC:16175]	PCAdmix_DOG
	ENSCAFG00000006861	ANGPT4	ANGPT4	24	20021601	20063208	1		ANGPT4	angiopoietin 4	angiopoietin 4 [Source:HGNC Symbol;Acc:HGNC:487]	PCAdmix_DOG
	ENSCAFG00000006877	FAM110A	FAM110A	24	20096373	20097260	-1		FAM110A	family with sequence similarity 110, member A	family with sequence similarity 110 member A [Source:HGNC Symbol;Acc:HGNC:16188]	PCAdmix_DOG
	ENSCAFG00000006904	SLC52A3	SLC52A3	24	20127810	20142461	1		SLC52A3	solute carrier family 52 (riboflavin transporter), member 3	solute carrier family 52 member 3 [Source:HGNC Symbol;Acc:HGNC:16187]	PCAdmix_DOG
	ENSCAFG00000028688	SRXN1	SRXN1	24	20232608	20236797	1		SRXN1	sulfiredoxin 1	sulfiredoxin 1 [Source:HGNC Symbol;Acc:HGNC:16132]	PCAdmix_DOG
	ENSCAFG00000006930	TCF15	TCF15	24	20274083	20281071	1		TCF15	transcription factor 15 (basic helix-loop-helix)	transcription factor 15 (basic helix-loop-helix) [Source:HGNC Symbol;Acc:HGNC:11627]	PCAdmix_DOG
	ENSCAFG00000006946		CSNK2A1	24	20361797	20387503	1		CSNK2A1	casein kinase 2, alpha 1 polypeptide		PCAdmix_DOG
	ENSCAFG00000030816	TBC1D20	TBC1D20	24	20400173	20422181	1		TBC1D20	TBC1 domain family, member 20	TBC1 domain family member 20 [Source:HGNC Symbol;Acc:HGNC:16133]	PCAdmix_DOG
	ENSCAFG00000006921	RBCK1	RBCK1	24	20423383	20440615	-1		RBCK1	RanBP-type and C3HC4-type zinc finger containing 1	RANBP2-type and C3HC4-type zinc finger containing 1 [Source:HGNC Symbol;Acc:HGNC:15864]	PCAdmix_DOG
	ENSCAFG00000006965	TRIB3	TRIB3	24	20449847	20461222	-1		TRIB3	tribbles pseudokinase 3	tribbles pseudokinase 3 [Source:HGNC Symbol;Acc:HGNC:16228]	PCAdmix_DOG
	ENSCAFG00000032144	NRSN2	NRSN2	24	20492014	20504806	-1		NRSN2	neurensin 2	neurensin 2 [Source:HGNC Symbol;Acc:HGNC:16229]	PCAdmix_DOG
	ENSCAFG00000006973	SOX12	SOX12	24	20513567	20514532	-1		SOX12	SRY (sex determining region Y)-box 12	SRY-box 12 [Source:HGNC Symbol;Acc:HGNC:11198]	PCAdmix_DOG
	ENSCAFG00000025206	ZCCHC3	ZCCHC3	24	20539369	20540735	-1				zinc finger CCHC-type containing 3 [Source:HGNC Symbol;Acc:HGNC:16230]	PCAdmix_DOG
	ENSCAFG00000006974	C20orf96	C20orf96	24	20546622	20568665	1		C24H20orf96	chromosome 24 open reading frame, human C20orf96	chromosome 20 open reading frame 96 [Source:HGNC Symbol;Acc:HGNC:16227]	PCAdmix_DOG
	ENSCAFG00000006980	CBD129	CBD129	24	20614030	20616415	-1		DEFB129	defensin, beta 129	Canis lupus familiaris defensin, beta 129 (DEFB129), mRNA. [Source:RefSeq mRNA;Acc:NM_001284488]	PCAdmix_DOG
	ENSCAFG00000006984	CBD128	CBD128	24	20652527	20654682	1		DEFB128	defensin, beta 128	beta-defensin 128 precursor [Source:RefSeq peptide;Acc:NP_001271374]	PCAdmix_DOG
	ENSCAFG00000025122			24	20684634	20688773	-1					PCAdmix_DOG
	ENSCAFG00000025097	CBD125	CBD125	24	20743523	20757512	-1		DEFB125	defensin, beta 125	defensin beta 125 [Source:HGNC Symbol;Acc:HGNC:18105]	PCAdmix_DOG
	ENSCAFG00000025054	CBD118	CBD118	24	20771397	20900739	1		DEFB118	defensin, beta 118	beta-defensin 118-like precursor [Source:RefSeq peptide;Acc:NP_001271418]	PCAdmix_DOG
	ENSCAFG00000025079	CBD116	CBD116	24	20833054	20840751	-1		DEFB116	defensin, beta 116	Canis lupus familiaris defensin, beta 116 (DEFB116), mRNA. [Source:RefSeq mRNA;Acc:NM_001284468]	PCAdmix_DOG
	ENSCAFG00000006989	DEFB119	DEFB119	24	20905210	20918355	-1		DEFB119	defensin, beta 119	Canis lupus familiaris defensin, beta 119 (DEFB119), mRNA. [Source:RefSeq mRNA;Acc:NM_001284444]	PCAdmix_DOG
	ENSCAFG00000025021	CBD121	CBD121	24	20927258	20929346	-1		DEFB121	defensin, beta 121	defensin beta 121 [Source:HGNC Symbol;Acc:HGNC:18101]	PCAdmix_DOG
	ENSCAFG00000006990	CBD122	CBD122	24	20940440	20949494	-1		DEFB122	beta-defensin 122	beta-defensin 122 isoform 1 precursor [Source:RefSeq peptide;Acc:NP_001019812]	PCAdmix_DOG
	ENSCAFG00000030438	CBD123	CBD123	24	20959239	20971219	1				defensin beta 123 [Source:HGNC Symbol;Acc:HGNC:18103]	PCAdmix_DOG
	ENSCAFG00000024871	CBD124	CBD124	24	20985512	20989827	-1		DEFB124	defensin, beta 124	defensin beta 124 [Source:HGNC Symbol;Acc:HGNC:18104]	PCAdmix_DOG
	ENSCAFG00000006991	REM1	REM1	24	20991132	21002937	1		REM1	RAS (RAD and GEM)-like GTP-binding 1	RRAD and GEM like GTPase 1 [Source:HGNC Symbol;Acc:HGNC:15922]	PCAdmix_DOG
	ENSCAFG00000007001			24	21012860	21014573	1					PCAdmix_DOG
	ENSCAFG00000007038	HM13	HM13	24	21026827	21067920	1		HM13	histocompatibility (minor) 13	histocompatibility (minor) 13 [Source:HGNC Symbol;Acc:HGNC:16435]	PCAdmix_DOG
	ENSCAFG00000007045			24	21094771	21096390	1					PCAdmix_DOG
	ENSCAFG00000007049	COX4I2	COX4I2	24	21123324	21141171	1				cytochrome c oxidase subunit 4I2 [Source:HGNC Symbol;Acc:HGNC:16232]	PCAdmix_DOG
	ENSCAFG00000007053	bcl-xL	bcl-xL	24	21145209	21196349	-1		BCL2L1	BCL2-like 1	BCL2 like 1 [Source:HGNC Symbol;Acc:HGNC:992]	PCAdmix_DOG
	ENSCAFG00000007075	TPX2	TPX2	24	21212809	21269494	1		TPX2	TPX2, microtubule-associated	TPX2, microtubule nucleation factor [Source:HGNC Symbol;Acc:HGNC:1249]	PCAdmix_DOG
	ENSCAFG00000007089	MYLK2	MYLK2	24	21284269	21297435	1		MYLK2	myosin light chain kinase 2	myosin light chain kinase 2 [Source:HGNC Symbol;Acc:HGNC:16243]	PCAdmix_DOG
	ENSCAFG00000031031	DUSP15	DUSP15	24	21295274	21333146	-1		DUSP15	dual specificity phosphatase 15	dual specificity phosphatase 15 [Source:HGNC Symbol;Acc:HGNC:16236]	PCAdmix_DOG
	ENSCAFG00000007099			24	21311274	21320878	-1					PCAdmix_DOG
	ENSCAFG00000007107	TTLL9	TTLL9	24	21339885	21379222	1		TTLL9	tubulin tyrosine ligase-like family member 9	tubulin tyrosine ligase like 9 [Source:HGNC Symbol;Acc:HGNC:16118]	PCAdmix_DOG
	ENSCAFG00000007116	PDRG1	PDRG1	24	21382068	21387370	-1		PDRG1	p53 and DNA-damage regulated 1	p53 and DNA damage regulated 1 [Source:HGNC Symbol;Acc:HGNC:16119]	PCAdmix_DOG
	ENSCAFG00000007118	XKR7	XKR7	24	21403551	21426295	1		XKR7	XK, Kell blood group complex subunit-related family, member 7	XK related 7 [Source:HGNC Symbol;Acc:HGNC:23062]	PCAdmix_DOG
	ENSCAFG00000007119	CCM2L	CCM2L	24	21437493	21455000	1				CCM2 like scaffolding protein [Source:HGNC Symbol;Acc:HGNC:16153]	PCAdmix_DOG
	ENSCAFG00000007122	HCK	HCK	24	21473305	21513489	1		HCK	HCK proto-oncogene, Src family tyrosine kinase	HCK proto-oncogene, Src family tyrosine kinase [Source:HGNC Symbol;Acc:HGNC:4840]	PCAdmix_DOG
	ENSCAFG00000007145	TM9SF4	TM9SF4	24	21522180	21575234	1		TM9SF4	transmembrane 9 superfamily protein member 4	transmembrane 9 superfamily member 4 [Source:HGNC Symbol;Acc:HGNC:30797]	PCAdmix_DOG
	ENSCAFG00000031042	PLAGL2	PLAGL2	24	21594594	21603015	-1		PLAGL2	pleiomorphic adenoma gene-like 2	PLAG1 like zinc finger 2 [Source:HGNC Symbol;Acc:HGNC:9047]	PCAdmix_DOG
	ENSCAFG00000007186	POFUT1	POFUT1	24	21608905	21636579	1		POFUT1	protein O-fucosyltransferase 1	protein O-fucosyltransferase 1 [Source:HGNC Symbol;Acc:HGNC:14988]	PCAdmix_DOG
	ENSCAFG00000007206	KIF3B	KIF3B	24	21666910	21703541	1		KIF3B	kinesin family member 3B	kinesin family member 3B [Source:HGNC Symbol;Acc:HGNC:6320]	PCAdmix_DOG
	ENSCAFG00000007219	ASXL1	ASXL1	24	21731567	21804772	1		ASXL1	additional sex combs like transcriptional regulator 1	additional sex combs like 1, transcriptional regulator [Source:HGNC Symbol;Acc:HGNC:18318]	PCAdmix_DOG
	ENSCAFG00000007232			24	21808606	21940054	-1					PCAdmix_DOG
	ENSCAFG00000028966			24	21844448	21845542	1					PCAdmix_DOG
	ENSCAFG00000030371	COMMD7	COMMD7	24	22032472	22057961	-1		COMMD7	COMM domain containing 7	COMM domain containing 7 [Source:HGNC Symbol;Acc:HGNC:16223]	PCAdmix_DOG
	ENSCAFG00000007268	DNMT3B	DNMT3B	24	22096400	22121962	1		DNMT3B	DNA (cytosine-5-)-methyltransferase 3 beta	DNA (cytosine-5-)-methyltransferase 3 beta [Source:HGNC Symbol;Acc:HGNC:2979]	PCAdmix_DOG
	ENSCAFG00000007306		MAPRE1	24	22130125	22163913	1		MAPRE1	microtubule-associated protein, RP/EB family, member 1	microtubule-associated protein RP/EB family member 1 [Source:RefSeq peptide;Acc:NP_001238875]	PCAdmix_DOG
	ENSCAFG00000031611	EFCAB8	EFCAB8	24	22162275	22238649	1		EFCAB8	EF-hand calcium binding domain 8	EF-hand calcium binding domain 8 [Source:HGNC Symbol;Acc:HGNC:34532]	PCAdmix_DOG
	ENSCAFG00000007323	SUN5	SUN5	24	22255917	22272170	-1				Sad1 and UNC84 domain containing 5 [Source:HGNC Symbol;Acc:HGNC:16252]	PCAdmix_DOG
	ENSCAFG00000007329	BPIFB2	BPIFB2	24	22275899	22294110	1		BPIFB2	BPI fold containing family B, member 2	BPI fold containing family B member 2 [Source:HGNC Symbol;Acc:HGNC:16177]	PCAdmix_DOG
	ENSCAFG00000007341	BPIFB6	BPIFB6	24	22301217	22313574	1		BPIFB6	BPI fold containing family B, member 6	BPI fold containing family B member 6 [Source:HGNC Symbol;Acc:HGNC:16504]	PCAdmix_DOG
	ENSCAFG00000007349	BPIFB3	BPIFB3	24	22321372	22337916	1		BPIFB3	BPI fold containing family B, member 3	BPI fold containing family B member 3 [Source:HGNC Symbol;Acc:HGNC:16178]	PCAdmix_DOG
	ENSCAFG00000007356	BPIFB4	BPIFB4	24	22344846	22369972	1				BPI fold containing family B member 4 [Source:HGNC Symbol;Acc:HGNC:16179]	PCAdmix_DOG
	ENSCAFG00000032553			24	22392074	22399592	1					PCAdmix_DOG
	ENSCAFG00000007360	BPIFA2	BPIFA2	24	22414178	22422871	1		BPIFA2	BPI fold containing family A, member 2	BPI fold containing family A member 2 [Source:HGNC Symbol;Acc:HGNC:16203]	PCAdmix_DOG
	ENSCAFG00000024734	BPIFA3	BPIFA3	24	22457760	22469134	1		BPIFA3	BPI fold containing family A, member 3	BPI fold containing family A member 3 [Source:HGNC Symbol;Acc:HGNC:16204]	PCAdmix_DOG
	ENSCAFG00000024453	BPIFA1	BPIFA1	24	22475212	22482712	1		BPIFA1	BPI fold containing family A, member 1	BPI fold containing family A member 1 [Source:HGNC Symbol;Acc:HGNC:15749]	PCAdmix_DOG
	ENSCAFG00000007381	BPIFB1	BPIFB1	24	22510504	22531341	1		BPIFB1	BPI fold containing family B, member 1	BPI fold containing family B member 1 [Source:HGNC Symbol;Acc:HGNC:16108]	PCAdmix_DOG
	ENSCAFG00000007395		LOC485836	24	22537056	22555981	1		LOC485836	uncharacterized LOC485836		PCAdmix_DOG
	ENSCAFG00000007398			24	22567885	22582177	1					PCAdmix_DOG
	ENSCAFG00000007403	CDK5RAP1	CDK5RAP1	24	22588195	22626969	-1		CDK5RAP1	CDK5 regulatory subunit associated protein 1	CDK5 regulatory subunit associated protein 1 [Source:HGNC Symbol;Acc:HGNC:15880]	PCAdmix_DOG
	ENSCAFG00000007410	SNTA1	SNTA1	24	22636189	22661619	-1				syntrophin alpha 1 [Source:HGNC Symbol;Acc:HGNC:11167]	PCAdmix_DOG
	ENSCAFG00000007420	CBFA2T2	CBFA2T2	24	22722786	22866484	1		CBFA2T2	core-binding factor, runt domain, alpha subunit 2; translocated to, 2	CBFA2/RUNX1 translocation partner 2 [Source:HGNC Symbol;Acc:HGNC:1536]	PCAdmix_DOG
	ENSCAFG00000008753	DPYSL2	DPYSL2	25	30900283	31038144	-1		DPYSL2	dihydropyrimidinase-like 2	dihydropyrimidinase like 2 [Source:HGNC Symbol;Acc:HGNC:3014]	PCAdmix_DOG
	ENSCAFG00000008813	PNMA2	PNMA2	25	31042477	31043571	1		PNMA2	paraneoplastic Ma antigen 2	paraneoplastic Ma antigen 2 [Source:HGNC Symbol;Acc:HGNC:9159]	PCAdmix_DOG
	ENSCAFG00000025105			25	31148663	31148830	-1					PCAdmix_DOG
	ENSCAFG00000008850	PPP2R2A	PPP2R2A	25	31193744	31281732	-1		PPP2R2A	protein phosphatase 2, regulatory subunit B, alpha	protein phosphatase 2 regulatory subunit Balpha [Source:HGNC Symbol;Acc:HGNC:9304]	PCAdmix_DOG
	ENSCAFG00000008918	EBF2	EBF2	25	31478349	31671089	1		EBF2	early B-cell factor 2	early B-cell factor 2 [Source:HGNC Symbol;Acc:HGNC:19090]	PCAdmix_DOG
	ENSCAFG00000007079			25	31764621	31766009	1					PCAdmix_DOG
	ENSCAFG00000008962	CDCA2	CDCA2	25	31941496	31997184	-1		CDCA2	cell division cycle associated 2	cell division cycle associated 2 [Source:HGNC Symbol;Acc:HGNC:14623]	PCAdmix_DOG
	ENSCAFG00000008969	KCTD9	KCTD9	25	32005081	32036642	1		KCTD9	potassium channel tetramerization domain containing 9	potassium channel tetramerization domain containing 9 [Source:HGNC Symbol;Acc:HGNC:22401]	PCAdmix_DOG
	ENSCAFG00000008985	GNRH1	GNRH1	25	32039284	32043110	1		GNRH1	gonadotropin-releasing hormone 1 (luteinizing-releasing hormone)	gonadotropin releasing hormone 1 [Source:HGNC Symbol;Acc:HGNC:4419]	PCAdmix_DOG
	ENSCAFG00000009001	DOCK5	DOCK5	25	32050203	32257096	-1		DOCK5	dedicator of cytokinesis 5	dedicator of cytokinesis 5 [Source:HGNC Symbol;Acc:HGNC:23476]	PCAdmix_DOG
	ENSCAFG00000009014	NEFL	NEFL	25	32463497	32469184	1		NEFL	neurofilament, light polypeptide	neurofilament, light polypeptide [Source:HGNC Symbol;Acc:HGNC:7739]	PCAdmix_DOG
	ENSCAFG00000025018	ADAM7	ADAM7	25	32946078	33007953	-1		ADAM7	ADAM metallopeptidase domain 7	ADAM metallopeptidase domain 7 [Source:HGNC Symbol;Acc:HGNC:214]	PCAdmix_DOG
	ENSCAFG00000024869	ADAMDEC1	ADAMDEC1	25	33046264	33061498	-1		ADAMDEC1	ADAM-like, decysin 1	ADAM like decysin 1 [Source:HGNC Symbol;Acc:HGNC:16299]	PCAdmix_DOG
	ENSCAFG00000009056	ADAM28	ADAM28	25	33091687	33147802	-1		ADAM28	ADAM metallopeptidase domain 28	ADAM metallopeptidase domain 28 [Source:HGNC Symbol;Acc:HGNC:206]	PCAdmix_DOG
	ENSCAFG00000009104	STC1	STC1	25	33615413	33628344	1		STC1	stanniocalcin 1	stanniocalcin 1 [Source:HGNC Symbol;Acc:HGNC:11373]	PCAdmix_DOG
	ENSCAFG00000024691	NKX2-6	NKX2-6	25	33781879	33785761	1				NK2 homeobox 6 [Source:HGNC Symbol;Acc:HGNC:32940]	PCAdmix_DOG
	ENSCAFG00000009107			25	33816207	33816626	1					PCAdmix_DOG
	ENSCAFG00000009114	SLC25A37	SLC25A37	25	33894132	33965389	-1				solute carrier family 25 member 37 [Source:HGNC Symbol;Acc:HGNC:29786]	PCAdmix_DOG
	ENSCAFG00000009139	ENTPD4	ENTPD4	25	34032083	34063281	1		ENTPD4	ectonucleoside triphosphate diphosphohydrolase 4	ectonucleoside triphosphate diphosphohydrolase 4 [Source:HGNC Symbol;Acc:HGNC:14573]	PCAdmix_DOG
	ENSCAFG00000009187	LOXL2	LOXL2	25	34126275	34185939	1		LOXL2	lysyl oxidase-like 2	lysyl oxidase like 2 [Source:HGNC Symbol;Acc:HGNC:6666]	PCAdmix_DOG
	ENSCAFG00000009210	R3HCC1	R3HCC1	25	34184880	34206962	-1		R3HCC1	R3H domain and coiled-coil containing 1	R3H domain and coiled-coil containing 1 [Source:HGNC Symbol;Acc:HGNC:27329]	PCAdmix_DOG
	ENSCAFG00000009217	CHMP7	CHMP7	25	34244078	34257169	-1		CHMP7	charged multivesicular body protein 7	charged multivesicular body protein 7 [Source:HGNC Symbol;Acc:HGNC:28439]	PCAdmix_DOG
	ENSCAFG00000009245	RHOBTB2	RHOBTB2	25	34301780	34319104	-1		RHOBTB2	Rho-related BTB domain containing 2	Rho related BTB domain containing 2 [Source:HGNC Symbol;Acc:HGNC:18756]	PCAdmix_DOG
	ENSCAFG00000009270		PEBP4	25	34328907	34574142	1		PEBP4	phosphatidylethanolamine-binding protein 4		PCAdmix_DOG
	ENSCAFG00000009272	EGR3	EGR3	25	34591863	34594346	1		EGR3	early growth response 3	early growth response 3 [Source:HGNC Symbol;Acc:HGNC:3240]	PCAdmix_DOG
	ENSCAFG00000009275	BIN3	BIN3	25	34615674	34658981	1		BIN3	bridging integrator 3	bridging integrator 3 [Source:HGNC Symbol;Acc:HGNC:1054]	PCAdmix_DOG
	ENSCAFG00000009285	CCAR2	CCAR2	25	34660755	34673099	-1		CCAR2	cell cycle and apoptosis regulator 2	cell cycle and apoptosis regulator 2 [Source:HGNC Symbol;Acc:HGNC:23360]	PCAdmix_DOG
	ENSCAFG00000009307		C25H8orf58	25	34675756	34679301	-1		C25H8orf58	chromosome 25 open reading frame, human C8orf58		PCAdmix_DOG
	ENSCAFG00000009329		PDLIM2	25	34685347	34696771	-1		PDLIM2	PDZ and LIM domain 2 (mystique)		PCAdmix_DOG
	ENSCAFG00000009371	SORBS3	SORBS3	25	34702293	34725197	-1				sorbin and SH3 domain containing 3 [Source:HGNC Symbol;Acc:HGNC:30907]	PCAdmix_DOG
	ENSCAFG00000009390	PPP3CC	PPP3CC	25	34734470	34838962	-1		PPP3CC	protein phosphatase 3, catalytic subunit, gamma isozyme	protein phosphatase 3 catalytic subunit gamma [Source:HGNC Symbol;Acc:HGNC:9316]	PCAdmix_DOG
	ENSCAFG00000009425	SLC39A14	SLC39A14	25	34853820	34901190	-1		SLC39A14	solute carrier family 39 (zinc transporter), member 14	solute carrier family 39 member 14 [Source:HGNC Symbol;Acc:HGNC:20858]	PCAdmix_DOG
	ENSCAFG00000009444	PIWIL2	PIWIL2	25	34911024	34987295	-1		PIWIL2	piwi-like RNA-mediated gene silencing 2	piwi like RNA-mediated gene silencing 2 [Source:HGNC Symbol;Acc:HGNC:17644]	PCAdmix_DOG
	ENSCAFG00000009455	POLR3D	POLR3D	25	35011861	35016613	-1		POLR3D	polymerase (RNA) III (DNA directed) polypeptide D, 44kDa	polymerase (RNA) III subunit D [Source:HGNC Symbol;Acc:HGNC:1080]	PCAdmix_DOG
	ENSCAFG00000009461	PHYHIP	PHYHIP	25	35031137	35037163	1				phytanoyl-CoA 2-hydroxylase interacting protein [Source:HGNC Symbol;Acc:HGNC:16865]	PCAdmix_DOG
	ENSCAFG00000009587	BMP1	BMP1	25	35044201	35087461	-1		BMP1	bone morphogenetic protein 1	bone morphogenetic protein 1 [Source:HGNC Symbol;Acc:HGNC:1067]	PCAdmix_DOG
	ENSCAFG00000009613	SFTPC	SFTPC	25	35088442	35091766	-1		SFTPC	surfactant protein C	surfactant protein C [Source:HGNC Symbol;Acc:HGNC:10802]	PCAdmix_DOG
	ENSCAFG00000009637	LGI3	LGI3	25	35097566	35104557	1		LGI3	leucine-rich repeat LGI family, member 3	leucine rich repeat LGI family member 3 [Source:HGNC Symbol;Acc:HGNC:18711]	PCAdmix_DOG
	ENSCAFG00000009647	REEP4	REEP4	25	35109598	35112685	1		REEP4	receptor accessory protein 4	receptor accessory protein 4 [Source:HGNC Symbol;Acc:HGNC:26176]	PCAdmix_DOG
	ENSCAFG00000009659	HR	HR	25	35119992	35138180	1		HR	hair growth associated	hair growth associated [Source:HGNC Symbol;Acc:HGNC:5172]	PCAdmix_DOG
	ENSCAFG00000009667	NUDT18	NUDT18	25	35140960	35143057	1		NUDT18	nudix (nucleoside diphosphate linked moiety X)-type motif 18	nudix hydrolase 18 [Source:HGNC Symbol;Acc:HGNC:26194]	PCAdmix_DOG
	ENSCAFG00000009703	FAM160B2	FAM160B2	25	35146460	35157228	-1		FAM160B2	family with sequence similarity 160, member B2	family with sequence similarity 160 member B2 [Source:HGNC Symbol;Acc:HGNC:16492]	PCAdmix_DOG
	ENSCAFG00000009736	DMTN	DMTN	25	35165820	35176654	-1				dematin actin binding protein [Source:HGNC Symbol;Acc:HGNC:3382]	PCAdmix_DOG
	ENSCAFG00000009749	FGF17	FGF17	25	35194748	35199792	-1		FGF17	fibroblast growth factor 17	fibroblast growth factor 17 [Source:HGNC Symbol;Acc:HGNC:3673]	PCAdmix_DOG
	ENSCAFG00000009751			25	35205843	35207623	-1					PCAdmix_DOG
	ENSCAFG00000009928	XPO7	XPO7	25	35238317	35277892	-1		XPO7	exportin 7	exportin 7 [Source:HGNC Symbol;Acc:HGNC:14108]	PCAdmix_DOG
	ENSCAFG00000010024	DOK2	DOK2	25	35334349	35339245	1		DOK2	docking protein 2, 56kDa	docking protein 2 [Source:HGNC Symbol;Acc:HGNC:2991]	PCAdmix_DOG
	ENSCAFG00000010049	GFRA2	GFRA2	25	35437179	35521771	1		GFRA2	GDNF family receptor alpha 2	GDNF family receptor alpha 2 [Source:HGNC Symbol;Acc:HGNC:4244]	PCAdmix_DOG
	ENSCAFG00000010055	LZTS1	LZTS1	25	36764074	36810391	1		LZTS1	leucine zipper, putative tumor suppressor 1	leucine zipper, putative tumor suppressor 1 [Source:HGNC Symbol;Acc:HGNC:13861]	PCAdmix_DOG
	ENSCAFG00000010095	ATP6V1B2	ATP6V1B2	25	36831153	36858932	-1		ATP6V1B2	ATPase, H+ transporting, lysosomal 56/58kDa, V1 subunit B2	ATPase H+ transporting V1 subunit B2 [Source:HGNC Symbol;Acc:HGNC:854]	PCAdmix_DOG
	ENSCAFG00000010147	SLC18A1	SLC18A1	25	36881068	36904061	1		SLC18A1	solute carrier family 18 (vesicular monoamine transporter), member 1	solute carrier family 18 member A1 [Source:HGNC Symbol;Acc:HGNC:10934]	PCAdmix_DOG
	ENSCAFG00000030052			25	36993556	37075268	1					PCAdmix_DOG
	ENSCAFG00000010158			25	37035500	37036661	-1					PCAdmix_DOG
	ENSCAFG00000010161	LPL	LPL	25	37079873	37103255	-1		LPL	lipoprotein lipase	lipoprotein lipase [Source:HGNC Symbol;Acc:HGNC:6677]	PCAdmix_DOG
	ENSCAFG00000024454			25	37206862	37214600	1					PCAdmix_DOG
	ENSCAFG00000031621	ZNF596	ZNF596	25	37245728	37260750	1		ZNF596	zinc finger protein 596	zinc finger protein 596 [Source:HGNC Symbol;Acc:HGNC:27268]	PCAdmix_DOG
	ENSCAFG00000032308		LOC477391	25	37285121	37296628	-1		LOC477391	zinc finger protein 501-like		PCAdmix_DOG
	ENSCAFG00000010195	FBXO25	FBXO25	25	37429763	37475450	1		FBXO25	F-box protein 25	F-box protein 25 [Source:HGNC Symbol;Acc:HGNC:13596]	PCAdmix_DOG
	ENSCAFG00000028467	TDRP	TDRP	25	37486121	37525780	-1				testis development related protein [Source:HGNC Symbol;Acc:HGNC:26951]	PCAdmix_DOG
	ENSCAFG00000010209	FAM124B	FAM124B	25	37659677	37675466	-1		FAM124B	family with sequence similarity 124B	family with sequence similarity 124 member B [Source:HGNC Symbol;Acc:HGNC:26224]	PCAdmix_DOG
	ENSCAFG00000010230	CUL3	CUL3	25	37733548	37800886	-1		CUL3	cullin 3	cullin 3 [Source:HGNC Symbol;Acc:HGNC:2553]	PCAdmix_DOG
	ENSCAFG00000010292	DOCK10	DOCK10	25	37962107	38161305	-1		DOCK10	dedicator of cytokinesis 10	dedicator of cytokinesis 10 [Source:HGNC Symbol;Acc:HGNC:23479]	PCAdmix_DOG
	ENSCAFG00000010328	NYAP2	NYAP2	25	38516357	38771407	1		NYAP2	neuronal tyrosine-phosphorylated phosphoinositide-3-kinase adaptor 2	neuronal tyrosine-phosphorylated phosphoinositide-3-kinase adaptor 2 [Source:HGNC Symbol;Acc:HGNC:29291]	PCAdmix_DOG
	ENSCAFG00000010505	CCL20	CCL20	25	40506750	40509709	1		CCL20	chemokine (C-C motif) ligand 20	C-C motif chemokine 20 precursor [Source:RefSeq peptide;Acc:NP_001005254]	PCAdmix_DOG
	ENSCAFG00000010512	DAW1	DAW1	25	40548251	40595825	1		DAW1	dynein assembly factor with WDR repeat domains 1	dynein assembly factor with WD repeats 1 [Source:HGNC Symbol;Acc:HGNC:26383]	PCAdmix_DOG
	ENSCAFG00000002456		ZNF268	26	46172	83902	-1		ZNF268	zinc finger protein 268		PCAdmix_DOG
	ENSCAFG00000031976	ZNF10	ZNF10	26	91169	99435	-1		ZNF10	zinc finger protein 10	zinc finger protein 10 [Source:HGNC Symbol;Acc:HGNC:12879]	PCAdmix_DOG
	ENSCAFG00000030275	ZNF140	ZNF140	26	134078	150429	-1		ZNF140	zinc finger protein 140	zinc finger protein 140 [Source:HGNC Symbol;Acc:HGNC:12925]	PCAdmix_DOG
	ENSCAFG00000024332			26	138221	138817	1					PCAdmix_DOG
	ENSCAFG00000031048	ZNF84	ZNF84	26	175107	216817	-1		ZNF26	zinc finger protein 26	zinc finger protein 84 [Source:HGNC Symbol;Acc:HGNC:13159]	PCAdmix_DOG
	ENSCAFG00000006033		ZNF605	26	236196	257312	1		ZNF605	zinc finger protein 605		PCAdmix_DOG
	ENSCAFG00000006074	CHFR	CHFR	26	295093	328522	1		CHFR	checkpoint with forkhead and ring finger domains, E3 ubiquitin protein ligase	checkpoint with forkhead and ring finger domains, E3 ubiquitin protein ligase [Source:HGNC Symbol;Acc:HGNC:20455]	PCAdmix_DOG
	ENSCAFG00000006084		GOLGA3	26	338650	376895	1		GOLGA3	golgin A3		PCAdmix_DOG
	ENSCAFG00000006101	ANKLE2	ANKLE2	26	379346	405414	1		ANKLE2	ankyrin repeat and LEM domain containing 2	ankyrin repeat and LEM domain containing 2 [Source:HGNC Symbol;Acc:HGNC:29101]	PCAdmix_DOG
	ENSCAFG00000006123	PGAM5	PGAM5	26	406659	414839	-1				PGAM family member 5, mitochondrial serine/threonine protein phosphatase [Source:HGNC Symbol;Acc:HGNC:28763]	PCAdmix_DOG
	ENSCAFG00000006130	PXMP2	PXMP2	26	418056	426321	-1		PXMP2	peroxisomal membrane protein 2, 22kDa	peroxisomal membrane protein 2 [Source:HGNC Symbol;Acc:HGNC:9716]	PCAdmix_DOG
	ENSCAFG00000006215	POLE	POLE	26	434043	479691	1		POLE	polymerase (DNA directed), epsilon, catalytic subunit	polymerase (DNA) epsilon, catalytic subunit [Source:HGNC Symbol;Acc:HGNC:9177]	PCAdmix_DOG
	ENSCAFG00000023460	FBRSL1	FBRSL1	26	535766	612730	-1				fibrosin like 1 [Source:HGNC Symbol;Acc:HGNC:29308]	PCAdmix_DOG
	ENSCAFG00000032366			26	584677	585288	1					PCAdmix_DOG
	ENSCAFG00000006281			26	702030	782145	1					PCAdmix_DOG
	ENSCAFG00000006300	NOC4L	NOC4L	26	823844	831985	-1		NOC4L	nucleolar complex associated 4 homolog	nucleolar complex associated 4 homolog [Source:HGNC Symbol;Acc:HGNC:28461]	PCAdmix_DOG
	ENSCAFG00000006320	DDX51	DDX51	26	831501	840201	1		DDX51	DEAD (Asp-Glu-Ala-Asp) box polypeptide 51	DEAD-box helicase 51 [Source:HGNC Symbol;Acc:HGNC:20082]	PCAdmix_DOG
	ENSCAFG00000006377	EP400	EP400	26	850333	939909	-1		EP400	E1A binding protein p400	E1A binding protein p400 [Source:HGNC Symbol;Acc:HGNC:11958]	PCAdmix_DOG
	ENSCAFG00000006429	PUS1	PUS1	26	951477	965522	-1		PUS1	pseudouridylate synthase 1	pseudouridylate synthase 1 [Source:HGNC Symbol;Acc:HGNC:15508]	PCAdmix_DOG
	ENSCAFG00000006446	ULK1	ULK1	26	965677	982229	-1		ULK1	unc-51 like autophagy activating kinase 1	unc-51 like autophagy activating kinase 1 [Source:HGNC Symbol;Acc:HGNC:12558]	PCAdmix_DOG
	ENSCAFG00000006533			26	1010354	1019298	-1					PCAdmix_DOG
	ENSCAFG00000006625	SFSWAP	SFSWAP	26	1035007	1104694	-1		SFSWAP	splicing factor, suppressor of white-apricot family	splicing factor SWAP homolog [Source:HGNC Symbol;Acc:HGNC:10790]	PCAdmix_DOG
	ENSCAFG00000006655	ADGRD1	ADGRD1	26	1254538	1378126	-1		ADGRD1	adhesion G protein-coupled receptor D1	adhesion G protein-coupled receptor D1 [Source:HGNC Symbol;Acc:HGNC:19893]	PCAdmix_DOG
	ENSCAFG00000006670	RAN	RAN	26	1432729	1436926	-1		RAN	RAN, member RAS oncogene family	GTP-binding nuclear protein Ran [Source:RefSeq peptide;Acc:NP_001181913]	PCAdmix_DOG
	ENSCAFG00000006694	STX2	STX2	26	1458431	1480385	1				syntaxin 2 [Source:HGNC Symbol;Acc:HGNC:3403]	PCAdmix_DOG
	ENSCAFG00000006700			26	1512424	1512900	-1					PCAdmix_DOG
	ENSCAFG00000006721	RIMBP2	RIMBP2	26	1672021	1744841	1		RIMBP2	RIMS binding protein 2	RIMS binding protein 2 [Source:HGNC Symbol;Acc:HGNC:30339]	PCAdmix_DOG
	ENSCAFG00000006773	PIWIL1	PIWIL1	26	1760102	1788580	-1		PIWIL1	piwi-like RNA-mediated gene silencing 1	piwi like RNA-mediated gene silencing 1 [Source:HGNC Symbol;Acc:HGNC:9007]	PCAdmix_DOG
	ENSCAFG00000006800	FZD10	FZD10	26	1907593	1909338	-1		FZD10	frizzled class receptor 10	frizzled class receptor 10 [Source:HGNC Symbol;Acc:HGNC:4039]	PCAdmix_DOG
	ENSCAFG00000006812	TMEM132D	TMEM132D	26	2074728	2662470	1		TMEM132D	transmembrane protein 132D	transmembrane protein 132D [Source:HGNC Symbol;Acc:HGNC:29411]	PCAdmix_DOG
	ENSCAFG00000006853		LOC477441	26	4300138	4301142	-1		LOC477441	glyceraldehyde-3-phosphate dehydrogenase-like		PCAdmix_DOG
	ENSCAFG00000006859	TMEM132B	TMEM132B	26	4453646	4667709	-1		TMEM132B	transmembrane protein 132B	transmembrane protein 132B [Source:HGNC Symbol;Acc:HGNC:29397]	PCAdmix_DOG
	ENSCAFG00000006931	BRI3BP	BRI3BP	26	4752148	4961436	-1		BRI3BP	BRI3 binding protein	BRI3 binding protein [Source:HGNC Symbol;Acc:HGNC:14251]	PCAdmix_DOG
	ENSCAFG00000006952	DHX37	DHX37	26	4963997	4994191	1		DHX37	DEAH (Asp-Glu-Ala-His) box polypeptide 37	DEAH-box helicase 37 [Source:HGNC Symbol;Acc:HGNC:17210]	PCAdmix_DOG
	ENSCAFG00000030419			26	5005906	5007135	-1					PCAdmix_DOG
	ENSCAFG00000018018		UBC	26	5007356	5008501	1		UBC	ubiquitin C		PCAdmix_DOG
	ENSCAFG00000006968	SCARB1	SCARB1	26	5087760	5122988	1		SCARB1	scavenger receptor class B, member 1	scavenger receptor class B member 1 [Source:HGNC Symbol;Acc:HGNC:1664]	PCAdmix_DOG
	ENSCAFG00000006985	NCOR2	NCOR2	26	5315660	5493741	1				nuclear receptor corepressor 2 [Source:HGNC Symbol;Acc:HGNC:7673]	PCAdmix_DOG
	ENSCAFG00000030081			26	5452990	5453877	-1					PCAdmix_DOG
	ENSCAFG00000006993	FAM101A	FAM101A	26	5502258	5504669	-1		FAM101A	family with sequence similarity 101, member A	family with sequence similarity 101 member A [Source:HGNC Symbol;Acc:HGNC:27051]	PCAdmix_DOG
	ENSCAFG00000006994	ZNF664	ZNF664	26	5701511	5702296	-1		ZNF664	zinc finger protein 664	zinc finger protein 664 [Source:HGNC Symbol;Acc:HGNC:25406]	PCAdmix_DOG
	ENSCAFG00000006996	CCDC92	CCDC92	26	5742783	5774186	1		CCDC92	coiled-coil domain containing 92	coiled-coil domain containing 92 [Source:HGNC Symbol;Acc:HGNC:29563]	PCAdmix_DOG
	ENSCAFG00000007042	DNAH10	DNAH10	26	5774286	5902222	-1				dynein axonemal heavy chain 10 [Source:HGNC Symbol;Acc:HGNC:2941]	PCAdmix_DOG
	ENSCAFG00000007234	ATP6V0A2	ATP6V0A2	26	5912887	5952152	-1		ATP6V0A2	ATPase, H+ transporting, lysosomal V0 subunit a2	ATPase H+ transporting V0 subunit a2 [Source:HGNC Symbol;Acc:HGNC:18481]	PCAdmix_DOG
	ENSCAFG00000023546	TCTN2	TCTN2	26	5954744	5979750	-1		TCTN2	tectonic family member 2	tectonic family member 2 [Source:HGNC Symbol;Acc:HGNC:25774]	PCAdmix_DOG
	ENSCAFG00000007434	EIF2B1	EIF2B1	26	6011425	6021521	1		EIF2B1	eukaryotic translation initiation factor 2B, subunit 1 alpha, 26kDa	eukaryotic translation initiation factor 2B subunit alpha [Source:HGNC Symbol;Acc:HGNC:3257]	PCAdmix_DOG
	ENSCAFG00000007452	DDX55	DDX55	26	6023308	6036782	-1		DDX55	DEAD (Asp-Glu-Ala-Asp) box polypeptide 55	DEAD-box helicase 55 [Source:HGNC Symbol;Acc:HGNC:20085]	PCAdmix_DOG
	ENSCAFG00000007468		TMED2	26	6037393	6047807	-1		TMED2	transmembrane p24 trafficking protein 2		PCAdmix_DOG
	ENSCAFG00000007482	RILPL1	RILPL1	26	6073027	6117001	1		RILPL1	Rab interacting lysosomal protein-like 1	Rab interacting lysosomal protein-like 1 [Source:HGNC Symbol;Acc:HGNC:26814]	PCAdmix_DOG
	ENSCAFG00000007484	SNRNP35	SNRNP35	26	6120717	6121457	-1		SNRNP35	small nuclear ribonucleoprotein 35kDa (U11/U12)	small nuclear ribonucleoprotein U11/U12 subunit 35 [Source:HGNC Symbol;Acc:HGNC:30852]	PCAdmix_DOG
	ENSCAFG00000015533			26	6129405	6129818	1					PCAdmix_DOG
	ENSCAFG00000007489	RILPL2	RILPL2	26	6145240	6165943	1		RILPL2	Rab interacting lysosomal protein-like 2	Rab interacting lysosomal protein like 2 [Source:HGNC Symbol;Acc:HGNC:28787]	PCAdmix_DOG
	ENSCAFG00000007493	KMT5A	KMT5A	26	6172511	6207509	-1				lysine methyltransferase 5A [Source:HGNC Symbol;Acc:HGNC:29489]	PCAdmix_DOG
	ENSCAFG00000007503	SBNO1	SBNO1	26	6216435	6425792	1		SBNO1	strawberry notch homolog 1 (Drosophila)	strawberry notch homolog 1 (Drosophila) [Source:HGNC Symbol;Acc:HGNC:22973]	PCAdmix_DOG
	ENSCAFG00000007512	C12orf65	C12orf65	26	6296863	6311547	-1		C26H12orf65	chromosome 26 open reading frame, human C12orf65	chromosome 12 open reading frame 65 [Source:HGNC Symbol;Acc:HGNC:26784]	PCAdmix_DOG
	ENSCAFG00000007524	MPHOSPH9	MPHOSPH9	26	6311759	6380363	1		MPHOSPH9	M-phase phosphoprotein 9	M-phase phosphoprotein 9 [Source:HGNC Symbol;Acc:HGNC:7215]	PCAdmix_DOG
	ENSCAFG00000007616	PITPNM2	PITPNM2	26	6413574	6519673	1		PITPNM2	phosphatidylinositol transfer protein, membrane-associated 2	phosphatidylinositol transfer protein membrane associated 2 [Source:HGNC Symbol;Acc:HGNC:21044]	PCAdmix_DOG
	ENSCAFG00000007665	ARL6IP4	ARL6IP4	26	6522664	6525218	-1		ARL6IP4	ADP-ribosylation factor-like 6 interacting protein 4	ADP ribosylation factor like GTPase 6 interacting protein 4 [Source:HGNC Symbol;Acc:HGNC:18076]	PCAdmix_DOG
	ENSCAFG00000007668	OGFOD2	OGFOD2	26	6526412	6530286	-1		OGFOD2	2-oxoglutarate and iron-dependent oxygenase domain containing 2	2-oxoglutarate and iron dependent oxygenase domain containing 2 [Source:HGNC Symbol;Acc:HGNC:25823]	PCAdmix_DOG
	ENSCAFG00000007676	ABCB9	ABCB9	26	6538286	6620408	1		ABCB9	ATP-binding cassette, sub-family B (MDR/TAP), member 9	ATP binding cassette subfamily B member 9 [Source:HGNC Symbol;Acc:HGNC:50]	PCAdmix_DOG
	ENSCAFG00000007764	HIP1R	HIP1R	26	6624791	6637734	-1		HIP1R	huntingtin interacting protein 1 related	huntingtin interacting protein 1 related [Source:HGNC Symbol;Acc:HGNC:18415]	PCAdmix_DOG
	ENSCAFG00000007817	CCDC62	CCDC62	26	6656434	6697115	-1		CCDC62	coiled-coil domain containing 62	coiled-coil domain containing 62 [Source:HGNC Symbol;Acc:HGNC:30723]	PCAdmix_DOG
	ENSCAFG00000032380	DENR	DENR	26	6699873	6716384	-1				density-regulated protein [Source:HGNC Symbol;Acc:HGNC:2769]	PCAdmix_DOG
	ENSCAFG00000007826	gpr81	gpr81	26	6734818	6735906	1		HCAR1	hydroxycarboxylic acid receptor 1	hydroxycarboxylic acid receptor 1 [Source:HGNC Symbol;Acc:HGNC:4532]	PCAdmix_DOG
	ENSCAFG00000007837	KNTC1	KNTC1	26	6788694	6864974	-1		KNTC1	kinetochore associated 1	kinetochore associated 1 [Source:HGNC Symbol;Acc:HGNC:17255]	PCAdmix_DOG
	ENSCAFG00000007852	RSRC2	RSRC2	26	6868081	6890564	1		RSRC2	arginine/serine-rich coiled-coil 2	arginine and serine rich coiled-coil 2 [Source:HGNC Symbol;Acc:HGNC:30559]	PCAdmix_DOG
	ENSCAFG00000007859	ZCCHC8	ZCCHC8	26	6896062	6927924	1		ZCCHC8	zinc finger, CCHC domain containing 8	zinc finger CCHC-type containing 8 [Source:HGNC Symbol;Acc:HGNC:25265]	PCAdmix_DOG
	ENSCAFG00000007898	CLIP1	CLIP1	26	6999949	7086528	1		CLIP1	CAP-GLY domain containing linker protein 1	CAP-Gly domain containing linker protein 1 [Source:HGNC Symbol;Acc:HGNC:10461]	PCAdmix_DOG
	ENSCAFG00000007919		VPS33A	26	7090725	7119662	1		VPS33A	vacuolar protein sorting 33 homolog A (S. cerevisiae)		PCAdmix_DOG
	ENSCAFG00000007933	DIABLO	DIABLO	26	7125405	7144308	1		DIABLO	diablo, IAP-binding mitochondrial protein	diablo IAP-binding mitochondrial protein [Source:HGNC Symbol;Acc:HGNC:21528]	PCAdmix_DOG
	ENSCAFG00000007938	B3GNT4	B3GNT4	26	7144819	7146053	-1				UDP-GlcNAc:betaGal beta-1,3-N-acetylglucosaminyltransferase 4 [Source:HGNC Symbol;Acc:HGNC:15683]	PCAdmix_DOG
	ENSCAFG00000024648	LRRC43	LRRC43	26	7153821	7162710	-1				leucine rich repeat containing 43 [Source:HGNC Symbol;Acc:HGNC:28562]	PCAdmix_DOG
	ENSCAFG00000030113	IL-31	IL-31	26	7173151	7175195	1		IL31	interleukin 31	interleukin 31 [Source:HGNC Symbol;Acc:HGNC:19372]	PCAdmix_DOG
	ENSCAFG00000007965	MLXIP	MLXIP	26	7190885	7247893	-1		MLXIP	MLX interacting protein	MLX interacting protein [Source:HGNC Symbol;Acc:HGNC:17055]	PCAdmix_DOG
	ENSCAFG00000032589	BCL7A	BCL7A	26	7264546	7295870	-1		BCL7A	B-cell CLL/lymphoma 7A	B-cell CLL/lymphoma 7A [Source:HGNC Symbol;Acc:HGNC:1004]	PCAdmix_DOG
	ENSCAFG00000008022	WDR66	WDR66	26	7305235	7374480	-1				WD repeat domain 66 [Source:HGNC Symbol;Acc:HGNC:28506]	PCAdmix_DOG
	ENSCAFG00000008038		PSMD9	26	7375589	7401065	-1		PSMD9	proteasome 26S subunit, non-ATPase 9		PCAdmix_DOG
	ENSCAFG00000008093	HPD	HPD	26	7430395	7440433	1		HPD	4-hydroxyphenylpyruvate dioxygenase	4-hydroxyphenylpyruvate dioxygenase [Source:HGNC Symbol;Acc:HGNC:5147]	PCAdmix_DOG
	ENSCAFG00000008167	SETD1B	SETD1B	26	7446267	7467080	-1		SETD1B	SET domain containing 1B	SET domain containing 1B [Source:HGNC Symbol;Acc:HGNC:29187]	PCAdmix_DOG
	ENSCAFG00000008188	RHOF	RHOF	26	7478091	7487994	1		RHOF	ras homolog family member F (in filopodia)	ras homolog family member F (in filopodia) [Source:HGNC Symbol;Acc:HGNC:15703]	PCAdmix_DOG
	ENSCAFG00000008203	TMEM120B	TMEM120B	26	7487061	7535760	-1		TMEM120B	transmembrane protein 120B	transmembrane protein 120B [Source:HGNC Symbol;Acc:HGNC:32008]	PCAdmix_DOG
	ENSCAFG00000008227	MORN3	MORN3	26	7568365	7579807	1		MORN3	MORN repeat containing 3	MORN repeat containing 3 [Source:HGNC Symbol;Acc:HGNC:29807]	PCAdmix_DOG
	ENSCAFG00000008233	ORAI1	ORAI1	26	7584880	7599401	-1		ORAI1	ORAI calcium release-activated calcium modulator 1	ORAI calcium release-activated calcium modulator 1 [Source:HGNC Symbol;Acc:HGNC:25896]	PCAdmix_DOG
	ENSCAFG00000008259	KDM2B	KDM2B	26	7626372	7744927	1		KDM2B	lysine (K)-specific demethylase 2B	lysine demethylase 2B [Source:HGNC Symbol;Acc:HGNC:13610]	PCAdmix_DOG
	ENSCAFG00000008294	RNF34	RNF34	26	7745871	7768637	-1				ring finger protein 34 [Source:HGNC Symbol;Acc:HGNC:17297]	PCAdmix_DOG
	ENSCAFG00000008313	ANAPC5	ANAPC5	26	7796801	7840986	1		ANAPC5	anaphase promoting complex subunit 5	anaphase promoting complex subunit 5 [Source:HGNC Symbol;Acc:HGNC:15713]	PCAdmix_DOG
	ENSCAFG00000008330	CAMKK2	CAMKK2	26	7846829	7892410	1		CAMKK2	calcium/calmodulin-dependent protein kinase kinase 2, beta	calcium/calmodulin dependent protein kinase kinase 2 [Source:HGNC Symbol;Acc:HGNC:1470]	PCAdmix_DOG
	ENSCAFG00000008363	P2RX4	P2RX4	26	7896837	7914234	-1		P2RX4	purinergic receptor P2X, ligand gated ion channel, 4	purinergic receptor P2X 4 [Source:HGNC Symbol;Acc:HGNC:8535]	PCAdmix_DOG
	ENSCAFG00000008401	P2RX7	P2RX7	26	7937120	7983848	-1		P2RX7	purinergic receptor P2X, ligand gated ion channel, 7	purinergic receptor P2X 7 [Source:HGNC Symbol;Acc:HGNC:8537]	PCAdmix_DOG
	ENSCAFG00000008428	IFT81	IFT81	26	8017187	8101787	1		IFT81	intraflagellar transport 81	intraflagellar transport 81 [Source:HGNC Symbol;Acc:HGNC:14313]	PCAdmix_DOG
	ENSCAFG00000008434	ATP2A2	ATP2A2	26	8148566	8209392	1		ATP2A2	ATPase, Ca++ transporting, cardiac muscle, slow twitch 2	Sarcoplasmic/endoplasmic reticulum calcium ATPase 2 [Source:UniProtKB/Swiss-Prot;Acc:O46674]	PCAdmix_DOG
	ENSCAFG00000008442	ANAPC7	ANAPC7	26	8221152	8248080	-1		ANAPC7	anaphase promoting complex subunit 7	anaphase promoting complex subunit 7 [Source:HGNC Symbol;Acc:HGNC:17380]	PCAdmix_DOG
	ENSCAFG00000032052	FAM216A	FAM216A	26	8291993	8300386	1		FAM216A	family with sequence similarity 216, member A	family with sequence similarity 216 member A [Source:HGNC Symbol;Acc:HGNC:30180]	PCAdmix_DOG
	ENSCAFG00000008481	VPS29	VPS29	26	8302054	8304627	-1		VPS29	VPS29 retromer complex component	vacuolar protein sorting-associated protein 29 isoform 2 [Source:RefSeq peptide;Acc:NP_001273799]	PCAdmix_DOG
	ENSCAFG00000008492	RAD9B	RAD9B	26	8309583	8343424	1		RAD9B	RAD9 checkpoint clamp component B	RAD9 checkpoint clamp component B [Source:HGNC Symbol;Acc:HGNC:21700]	PCAdmix_DOG
	ENSCAFG00000032439	PPTC7	PPTC7	26	8346887	8384268	-1		PPTC7	PTC7 protein phosphatase homolog	PTC7 protein phosphatase homolog [Source:HGNC Symbol;Acc:HGNC:30695]	PCAdmix_DOG
	ENSCAFG00000008506	TCTN1	TCTN1	26	8411419	8436123	1		TCTN1	tectonic family member 1	tectonic family member 1 [Source:HGNC Symbol;Acc:HGNC:26113]	PCAdmix_DOG
	ENSCAFG00000008511	HVCN1	HVCN1	26	8437233	8471890	-1		HVCN1	hydrogen voltage gated channel 1	hydrogen voltage gated channel 1 [Source:HGNC Symbol;Acc:HGNC:28240]	PCAdmix_DOG
	ENSCAFG00000008575	CUX2	CUX2	26	8730082	8996271	1		CUX2	cut-like homeobox 2	cut like homeobox 2 [Source:HGNC Symbol;Acc:HGNC:19347]	PCAdmix_DOG
	ENSCAFG00000023696	FAM109A	FAM109A	26	9004917	9005767	-1				family with sequence similarity 109 member A [Source:HGNC Symbol;Acc:HGNC:26509]	PCAdmix_DOG
	ENSCAFG00000008601	SH2B3	SH2B3	26	9033447	9074450	1		SH2B3	SH2B adaptor protein 3	SH2B adaptor protein 3 [Source:HGNC Symbol;Acc:HGNC:29605]	PCAdmix_DOG
	ENSCAFG00000008606	ATXN2	ATXN2	26	9073390	9188414	-1		ATXN2	ataxin 2	ataxin 2 [Source:HGNC Symbol;Acc:HGNC:10555]	PCAdmix_DOG
	ENSCAFG00000008615	BRAP	BRAP	26	9221896	9251053	-1		BRAP	BRCA1 associated protein	BRCA1 associated protein [Source:HGNC Symbol;Acc:HGNC:1099]	PCAdmix_DOG
	ENSCAFG00000008627	ACAD10	ACAD10	26	9251108	9299299	1				acyl-CoA dehydrogenase family member 10 [Source:HGNC Symbol;Acc:HGNC:21597]	PCAdmix_DOG
	ENSCAFG00000008641			26	9302332	9303500	-1					PCAdmix_DOG
	ENSCAFG00000008683		ALDH2	26	9319232	9356259	1		ALDH2	aldehyde dehydrogenase 2 family (mitochondrial)		PCAdmix_DOG
	ENSCAFG00000008745	MAPKAPK5	MAPKAPK5	26	9381036	9419183	1		MAPKAPK5	mitogen-activated protein kinase-activated protein kinase 5	mitogen-activated protein kinase-activated protein kinase 5 [Source:HGNC Symbol;Acc:HGNC:6889]	PCAdmix_DOG
	ENSCAFG00000015330		LOC100683375	26	9423486	9426233	1		LOC100683375	disintegrin and metalloproteinase domain-containing protein 1a-like		PCAdmix_DOG
	ENSCAFG00000008770	TMEM116	TMEM116	26	9424656	9590706	-1		TMEM116	transmembrane protein 116	transmembrane protein 116 [Source:HGNC Symbol;Acc:HGNC:25084]	PCAdmix_DOG
	ENSCAFG00000008764		LOC477481	26	9446066	9448513	1		LOC477481	disintegrin and metalloproteinase domain-containing protein 1a-like		PCAdmix_DOG
	ENSCAFG00000029041			26	9469002	9470336	1					PCAdmix_DOG
	ENSCAFG00000030033	ERP29	ERP29	26	9608243	9618288	1				endoplasmic reticulum protein 29 [Source:HGNC Symbol;Acc:HGNC:13799]	PCAdmix_DOG
	ENSCAFG00000008792	NAA25	NAA25	26	9623575	9699136	-1		NAA25	N(alpha)-acetyltransferase 25, NatB auxiliary subunit	N(alpha)-acetyltransferase 25, NatB auxiliary subunit [Source:HGNC Symbol;Acc:HGNC:25783]	PCAdmix_DOG
	ENSCAFG00000008828			26	9712809	9713491	1					PCAdmix_DOG
	ENSCAFG00000008830	TRAFD1	TRAFD1	26	9721837	9748243	1		TRAFD1	TRAF-type zinc finger domain containing 1	TRAF-type zinc finger domain containing 1 [Source:HGNC Symbol;Acc:HGNC:24808]	PCAdmix_DOG
	ENSCAFG00000008851	HECTD4	HECTD4	26	9767169	9901152	-1		HECTD4	HECT domain containing E3 ubiquitin protein ligase 4	HECT domain E3 ubiquitin protein ligase 4 [Source:HGNC Symbol;Acc:HGNC:26611]	PCAdmix_DOG
	ENSCAFG00000009061	SLC8B1	SLC8B1	26	10663426	10688304	-1		SLC8B1	solute carrier family 8 (sodium/lithium/calcium exchanger), member B1	solute carrier family 8 member B1 [Source:HGNC Symbol;Acc:HGNC:26175]	PCAdmix_DOG
	ENSCAFG00000009076	PLBD2	PLBD2	26	10699801	10722956	1		PLBD2	phospholipase B domain containing 2	phospholipase B domain containing 2 [Source:HGNC Symbol;Acc:HGNC:27283]	PCAdmix_DOG
	ENSCAFG00000009097	SDSL	SDSL	26	10748680	10759589	1		SDSL	serine dehydratase-like	serine dehydratase like [Source:HGNC Symbol;Acc:HGNC:30404]	PCAdmix_DOG
	ENSCAFG00000009121	LHX5	LHX5	26	10777242	10785463	-1		LHX5	LIM homeobox 5	LIM homeobox 5 [Source:HGNC Symbol;Acc:HGNC:14216]	PCAdmix_DOG
	ENSCAFG00000009146	RBM19	RBM19	26	11046160	11169891	-1		RBM19	RNA binding motif protein 19	RNA binding motif protein 19 [Source:HGNC Symbol;Acc:HGNC:29098]	PCAdmix_DOG
	ENSCAFG00000009189	TBX5	TBX5	26	11464129	11508154	-1		TBX5	T-box 5	T-box 5 [Source:HGNC Symbol;Acc:HGNC:11604]	PCAdmix_DOG
	ENSCAFG00000030864			26	11511122	11512738	-1					PCAdmix_DOG
	ENSCAFG00000009216	TBX3	TBX3	26	11696565	11708211	-1				T-box 3 [Source:HGNC Symbol;Acc:HGNC:11602]	PCAdmix_DOG
	ENSCAFG00000009257	MED13L	MED13L	26	12770448	13030536	-1		MED13L	mediator complex subunit 13-like	mediator complex subunit 13 like [Source:HGNC Symbol;Acc:HGNC:22962]	PCAdmix_DOG
	ENSCAFG00000009288			26	13396410	13410332	-1					PCAdmix_DOG
	ENSCAFG00000009290	RNFT2	RNFT2	26	13410185	13478606	1		RNFT2	ring finger protein, transmembrane 2	ring finger protein, transmembrane 2 [Source:HGNC Symbol;Acc:HGNC:25905]	PCAdmix_DOG
	ENSCAFG00000009294	HRK	HRK	26	13500859	13501131	-1		HRK	harakiri, BCL2 interacting protein	harakiri, BCL2 interacting protein [Source:HGNC Symbol;Acc:HGNC:5185]	PCAdmix_DOG
	ENSCAFG00000009295	FBXW8	FBXW8	26	13520644	13638246	1				F-box and WD repeat domain containing 8 [Source:HGNC Symbol;Acc:HGNC:13597]	PCAdmix_DOG
	ENSCAFG00000009300	TESC	TESC	26	13645665	13670018	-1				tescalcin [Source:HGNC Symbol;Acc:HGNC:26065]	PCAdmix_DOG
	ENSCAFG00000009303	FBXO21	FBXO21	26	13721887	13769503	-1		FBXO21	F-box protein 21	F-box protein 21 [Source:HGNC Symbol;Acc:HGNC:13592]	PCAdmix_DOG
	ENSCAFG00000009820	NOS1	NOS1	26	13787602	13962324	-1		NOS1	nitric oxide synthase 1 (neuronal)	nitric oxide synthase, brain [Source:RefSeq peptide;Acc:NP_001182074]	PCAdmix_DOG
	ENSCAFG00000009865	KSR2	KSR2	26	13993993	14394212	-1		KSR2	kinase suppressor of ras 2	kinase suppressor of ras 2 [Source:HGNC Symbol;Acc:HGNC:18610]	PCAdmix_DOG
	ENSCAFG00000009890	RFC5	RFC5	26	14428771	14438951	1		RFC5	replication factor C (activator 1) 5, 36.5kDa	replication factor C subunit 5 [Source:HGNC Symbol;Acc:HGNC:9973]	PCAdmix_DOG
	ENSCAFG00000009902	WSB2	WSB2	26	14441305	14452487	-1		WSB2	WD repeat and SOCS box containing 2	WD repeat and SOCS box containing 2 [Source:HGNC Symbol;Acc:HGNC:19222]	PCAdmix_DOG
	ENSCAFG00000009906	VSIG10	VSIG10	26	14463585	14496539	-1		VSIG10	V-set and immunoglobulin domain containing 10	V-set and immunoglobulin domain containing 10 [Source:HGNC Symbol;Acc:HGNC:26078]	PCAdmix_DOG
	ENSCAFG00000009910	PEBP1	PEBP1	26	14499958	14546447	1				phosphatidylethanolamine binding protein 1 [Source:HGNC Symbol;Acc:HGNC:8630]	PCAdmix_DOG
	ENSCAFG00000009924	TAOK3	TAOK3	26	14532448	14712916	-1		TAOK3	TAO kinase 3	TAO kinase 3 [Source:HGNC Symbol;Acc:HGNC:18133]	PCAdmix_DOG
	ENSCAFG00000009939	SUDS3	SUDS3	26	14716562	14749645	1		SUDS3	suppressor of defective silencing 3 homolog (S. cerevisiae)	SDS3 homolog, SIN3A corepressor complex component [Source:HGNC Symbol;Acc:HGNC:29545]	PCAdmix_DOG
	ENSCAFG00000023113	SRRM4	SRRM4	26	15171325	15318325	1		SRRM4	serine/arginine repetitive matrix 4	serine/arginine repetitive matrix 4 [Source:HGNC Symbol;Acc:HGNC:29389]	PCAdmix_DOG
	ENSCAFG00000030537	HSPB8	HSPB8	26	15337273	15352013	1		HSPB8	heat shock 22kDa protein 8	heat shock protein family B (small) member 8 [Source:HGNC Symbol;Acc:HGNC:30171]	PCAdmix_DOG
	ENSCAFG00000009962	CCDC60	CCDC60	26	15455835	15607076	1		CCDC60	coiled-coil domain containing 60	coiled-coil domain containing 60 [Source:HGNC Symbol;Acc:HGNC:28610]	PCAdmix_DOG
	ENSCAFG00000030109	TMEM233	TMEM233	26	15653322	15678382	1		TMEM233	transmembrane protein 233	transmembrane protein 233 [Source:HGNC Symbol;Acc:HGNC:37219]	PCAdmix_DOG
	ENSCAFG00000009986	PRKAB1	PRKAB1	26	15706442	15716811	1		PRKAB1	protein kinase, AMP-activated, beta 1 non-catalytic subunit	protein kinase AMP-activated non-catalytic subunit beta 1 [Source:HGNC Symbol;Acc:HGNC:9378]	PCAdmix_DOG
	ENSCAFG00000010114	CIT	CIT	26	15719698	15884090	-1		CIT	citron rho-interacting serine/threonine kinase	citron rho-interacting serine/threonine kinase [Source:HGNC Symbol;Acc:HGNC:1985]	PCAdmix_DOG
	ENSCAFG00000010140	BICDL1	BICDL1	26	15958283	16061129	1		CCDC64	coiled-coil domain containing 64	BICD family like cargo adaptor 1 [Source:HGNC Symbol;Acc:HGNC:28095]	PCAdmix_DOG
	ENSCAFG00000010145	RAB35	RAB35	26	16061148	16078309	-1		RAB35	RAB35, member RAS oncogene family	RAB35, member RAS oncogene family [Source:HGNC Symbol;Acc:HGNC:9774]	PCAdmix_DOG
	ENSCAFG00000010203	GCN1	GCN1	26	16083354	16146838	-1		GCN1	GCN1 eIF2 alpha kinase activator homolog	GCN1, eIF2 alpha kinase activator homolog [Source:HGNC Symbol;Acc:HGNC:4199]	PCAdmix_DOG
	ENSCAFG00000010227		RPLP0	26	16148467	16153614	-1		RPLP0	ribosomal protein, large, P0		PCAdmix_DOG
	ENSCAFG00000010241	PXN	PXN	26	16156280	16169544	-1				paxillin [Source:HGNC Symbol;Acc:HGNC:9718]	PCAdmix_DOG
	ENSCAFG00000010258	SIRT4	SIRT4	26	16234422	16240012	1		SIRT4	sirtuin 4	sirtuin 4 [Source:HGNC Symbol;Acc:HGNC:14932]	PCAdmix_DOG
	ENSCAFG00000010263	PLA2G1B	PLA2G1B	26	16248296	16257163	-1		PLA2G1B	phospholipase A2, group IB (pancreas)	Phospholipase A2 [Source:UniProtKB/Swiss-Prot;Acc:P06596]	PCAdmix_DOG
	ENSCAFG00000010283	MSI1	MSI1	26	16266079	16288902	-1		MSI1	musashi RNA-binding protein 1	musashi RNA binding protein 1 [Source:HGNC Symbol;Acc:HGNC:7330]	PCAdmix_DOG
	ENSCAFG00000031458			26	16346370	16348857	1					PCAdmix_DOG
	ENSCAFG00000030019	TRIAP1	TRIAP1	26	16351375	16352773	-1		TRIAP1	TP53 regulated inhibitor of apoptosis 1	TP53 regulated inhibitor of apoptosis 1 [Source:HGNC Symbol;Acc:HGNC:26937]	PCAdmix_DOG
	ENSCAFG00000010314	SRSF9	SRSF9	26	16352627	16369615	-1		SRSF9	serine/arginine-rich splicing factor 9	serine and arginine rich splicing factor 9 [Source:HGNC Symbol;Acc:HGNC:10791]	PCAdmix_DOG
	ENSCAFG00000010311		GATC	26	16352870	16361852	1		GATC	glutamyl-tRNA(Gln) amidotransferase, subunit C		PCAdmix_DOG
	ENSCAFG00000010637	ANKRD13A	ANKRD13A	26	17137382	17168228	-1		ANKRD13A	ankyrin repeat domain 13A	ankyrin repeat domain 13A [Source:HGNC Symbol;Acc:HGNC:21268]	PCAdmix_DOG
	ENSCAFG00000010725	GIT2	GIT2	26	17170623	17217714	1		GIT2	G protein-coupled receptor kinase interacting ArfGAP 2	GIT ArfGAP 2 [Source:HGNC Symbol;Acc:HGNC:4273]	PCAdmix_DOG
	ENSCAFG00000010765	TCHP	TCHP	26	17229123	17241270	-1		TCHP	trichoplein, keratin filament binding	trichoplein keratin filament binding [Source:HGNC Symbol;Acc:HGNC:28135]	PCAdmix_DOG
	ENSCAFG00000010796	GLTP	GLTP	26	17262100	17330421	1		TRPV4	transient receptor potential cation channel, subfamily V, member 4	transient receptor potential cation channel subfamily V member 4 [Source:RefSeq peptide;Acc:NP_001120787]	PCAdmix_DOG
	ENSCAFG00000010828	FAM222A	FAM222A	26	17340855	17366475	-1		FAM222A	family with sequence similarity 222, member A	family with sequence similarity 222 member A [Source:HGNC Symbol;Acc:HGNC:25915]	PCAdmix_DOG
	ENSCAFG00000010834	MVK	MVK	26	17496781	17517929	-1		MVK	mevalonate kinase	mevalonate kinase [Source:HGNC Symbol;Acc:HGNC:7530]	PCAdmix_DOG
	ENSCAFG00000010857	MMAB	MMAB	26	17519218	17529304	1		MMAB	methylmalonic aciduria (cobalamin deficiency) cblB type	methylmalonic aciduria (cobalamin deficiency) cblB type [Source:HGNC Symbol;Acc:HGNC:19331]	PCAdmix_DOG
	ENSCAFG00000010870	UBE3B	UBE3B	26	17543914	17597699	-1		UBE3B	ubiquitin protein ligase E3B	ubiquitin protein ligase E3B [Source:HGNC Symbol;Acc:HGNC:13478]	PCAdmix_DOG
	ENSCAFG00000010892	KCTD10	KCTD10	26	17604262	17626579	1		KCTD10	potassium channel tetramerization domain containing 10	potassium channel tetramerization domain containing 10 [Source:HGNC Symbol;Acc:HGNC:23236]	PCAdmix_DOG
	ENSCAFG00000024173	MYO1H	MYO1H	26	17626683	17669742	-1		MYO1H	myosin IH	myosin IH [Source:HGNC Symbol;Acc:HGNC:13879]	PCAdmix_DOG
	ENSCAFG00000010915	FOXN4	FOXN4	26	17728971	17757780	1		FOXN4	forkhead box N4	forkhead box N4 [Source:HGNC Symbol;Acc:HGNC:21399]	PCAdmix_DOG
	ENSCAFG00000010991	ACACB	ACACB	26	17763458	17895615	-1		ACACB	acetyl-CoA carboxylase beta	acetyl-CoA carboxylase beta [Source:HGNC Symbol;Acc:HGNC:85]	PCAdmix_DOG
	ENSCAFG00000011144	UNG	UNG	26	17901376	17911008	-1		UNG	uracil DNA glycosylase	uracil DNA glycosylase [Source:HGNC Symbol;Acc:HGNC:12572]	PCAdmix_DOG
	ENSCAFG00000011152	ALKBH2	ALKBH2	26	17913170	17917781	1		ALKBH2	alkB homolog 2, alpha-ketoglutarate-dependent dioxygenase	alkB homolog 2, alpha-ketoglutarate dependent dioxygenase [Source:HGNC Symbol;Acc:HGNC:32487]	PCAdmix_DOG
	ENSCAFG00000011165	USP30	USP30	26	17915857	17982494	-1		USP30	ubiquitin specific peptidase 30	ubiquitin specific peptidase 30 [Source:HGNC Symbol;Acc:HGNC:20065]	PCAdmix_DOG
	ENSCAFG00000011185	SVOP	SVOP	26	17984644	18032449	1				SV2 related protein [Source:HGNC Symbol;Acc:HGNC:25417]	PCAdmix_DOG
	ENSCAFG00000011224	DAO	DAO	26	18038075	18057238	-1		DAO	D-amino-acid oxidase	D-amino-acid oxidase [Source:HGNC Symbol;Acc:HGNC:2671]	PCAdmix_DOG
	ENSCAFG00000011261	SSH1	SSH1	26	18074133	18131185	1		SSH1	slingshot protein phosphatase 1	slingshot protein phosphatase 1 [Source:HGNC Symbol;Acc:HGNC:30579]	PCAdmix_DOG
	ENSCAFG00000011301	CORO1C	CORO1C	26	18161463	18238842	1		CORO1C	coronin, actin binding protein, 1C	coronin 1C [Source:HGNC Symbol;Acc:HGNC:2254]	PCAdmix_DOG
	ENSCAFG00000011317	SELPLG	SELPLG	26	18249763	18260485	1		SELPLG	selectin P ligand	P-selectin glycoprotein ligand 1 precursor [Source:RefSeq peptide;Acc:NP_001229648]	PCAdmix_DOG
	ENSCAFG00000032030	TMEM119	TMEM119	26	18275660	18282945	1		TMEM119	transmembrane protein 119	transmembrane protein 119 [Source:HGNC Symbol;Acc:HGNC:27884]	PCAdmix_DOG
	ENSCAFG00000011324	ISCU	ISCU	26	18300785	18307625	-1		ISCU	iron-sulfur cluster assembly enzyme	iron-sulfur cluster assembly enzyme [Source:HGNC Symbol;Acc:HGNC:29882]	PCAdmix_DOG
	ENSCAFG00000011352	SART3	SART3	26	18308733	18345010	1		SART3	squamous cell carcinoma antigen recognized by T cells 3	squamous cell carcinoma antigen recognized by T-cells 3 [Source:HGNC Symbol;Acc:HGNC:16860]	PCAdmix_DOG
	ENSCAFG00000011383	CMKLR1	CMKLR1	26	18532479	18533576	1		CMKLR1	chemerin chemokine-like receptor 1	chemerin chemokine-like receptor 1 [Source:HGNC Symbol;Acc:HGNC:2121]	PCAdmix_DOG
	ENSCAFG00000011390	WSCD2	WSCD2	26	18574098	18691280	-1		WSCD2	WSC domain containing 2	WSC domain containing 2 [Source:HGNC Symbol;Acc:HGNC:29117]	PCAdmix_DOG
	ENSCAFG00000011498	SGSM1	SGSM1	26	18976904	19055283	1		SGSM1	small G protein signaling modulator 1	small G protein signaling modulator 1 [Source:HGNC Symbol;Acc:HGNC:29410]	PCAdmix_DOG
	ENSCAFG00000030511			26	18976906	18977703	-1					PCAdmix_DOG
	ENSCAFG00000024672	TMEM211	TMEM211	26	19063716	19067417	-1		TMEM211	transmembrane protein 211	transmembrane protein 211 [Source:HGNC Symbol;Acc:HGNC:33725]	PCAdmix_DOG
	ENSCAFG00000024641	KIAA1671	KIAA1671	26	19124264	19276144	1		KIAA1671	KIAA1671 ortholog	KIAA1671 [Source:HGNC Symbol;Acc:HGNC:29345]	PCAdmix_DOG
	ENSCAFG00000011573	CRYBB3	CRYBB3	26	19286498	19291281	1		CRYBB3	crystallin, beta B3	crystallin beta B3 [Source:HGNC Symbol;Acc:HGNC:2400]	PCAdmix_DOG
	ENSCAFG00000023827	CRYBB2	CRYBB2	26	19298947	19308447	1		CRYBB2	crystallin, beta B2	Beta-crystallin B2 [Source:UniProtKB/Swiss-Prot;Acc:Q2LEC2]	PCAdmix_DOG
	ENSCAFG00000011603	GRK3	GRK3	26	19408466	19506619	1		ADRBK2	adrenergic, beta, receptor kinase 2	G protein-coupled receptor kinase 3 [Source:HGNC Symbol;Acc:HGNC:290]	PCAdmix_DOG
	ENSCAFG00000011660	MYO18B	MYO18B	26	19520198	19776021	1		MYO18B	myosin XVIIIB	myosin XVIIIB [Source:HGNC Symbol;Acc:HGNC:18150]	PCAdmix_DOG
	ENSCAFG00000011694	SEZ6L	SEZ6L	26	19889395	20079319	1		SEZ6L	seizure related 6 homolog (mouse)-like	seizure related 6 homolog like [Source:HGNC Symbol;Acc:HGNC:10763]	PCAdmix_DOG
	ENSCAFG00000011720	ASPHD2	ASPHD2	26	20112732	20123953	1		ASPHD2	aspartate beta-hydroxylase domain containing 2	aspartate beta-hydroxylase domain containing 2 [Source:HGNC Symbol;Acc:HGNC:30437]	PCAdmix_DOG
	ENSCAFG00000011729	HPS4	HPS4	26	20131425	20157043	-1		HPS4	Hermansky-Pudlak syndrome 4	HPS4, biogenesis of lysosomal organelles complex 3 subunit 2 [Source:HGNC Symbol;Acc:HGNC:15844]	PCAdmix_DOG
	ENSCAFG00000011732	SRRD	SRRD	26	20165633	20178019	1		SRRD	SRR1 domain containing	SRR1 domain containing [Source:HGNC Symbol;Acc:HGNC:33910]	PCAdmix_DOG
	ENSCAFG00000011741	TFIP11	TFIP11	26	20173830	20192469	-1		TFIP11	tuftelin interacting protein 11	Tuftelin-interacting protein 11 [Source:UniProtKB/Swiss-Prot;Acc:A1XD97]	PCAdmix_DOG
	ENSCAFG00000011758	TPST2	TPST2	26	20201893	20217275	-1		TPST2	tyrosylprotein sulfotransferase 2	tyrosylprotein sulfotransferase 2 [Source:HGNC Symbol;Acc:HGNC:12021]	PCAdmix_DOG
	ENSCAFG00000011779	CRYBB1	CRYBB1	26	20258968	20268161	-1		CRYBB1	crystallin, beta B1	crystallin beta B1 [Source:HGNC Symbol;Acc:HGNC:2397]	PCAdmix_DOG
	ENSCAFG00000011809	CRYBA4	CRYBA4	26	20273730	20280368	1		CRYBA4	crystallin, beta A4	beta-crystallin A4 [Source:RefSeq peptide;Acc:NP_001074366]	PCAdmix_DOG
	ENSCAFG00000011823	MN1	MN1	26	21216846	21261031	-1				meningioma (disrupted in balanced translocation) 1 [Source:HGNC Symbol;Acc:HGNC:7180]	PCAdmix_DOG
	ENSCAFG00000032421			26	21257609	21259474	1					PCAdmix_DOG
	ENSCAFG00000011830	PITPNB	PITPNB	26	21304452	21369641	-1		PITPNB	phosphatidylinositol transfer protein, beta	phosphatidylinositol transfer protein beta [Source:HGNC Symbol;Acc:HGNC:9002]	PCAdmix_DOG
	ENSCAFG00000011849	TTC28	TTC28	26	21427961	22049669	-1		TTC28	tetratricopeptide repeat domain 28	tetratricopeptide repeat domain 28 [Source:HGNC Symbol;Acc:HGNC:29179]	PCAdmix_DOG
	ENSCAFG00000011919	CHEK2	CHEK2	26	22052143	22108815	-1		CHEK2	checkpoint kinase 2	checkpoint kinase 2 [Source:HGNC Symbol;Acc:HGNC:16627]	PCAdmix_DOG
	ENSCAFG00000011928	HSCB	HSCB	26	22103868	22120152	1		HSCB	HscB mitochondrial iron-sulfur cluster co-chaperone	HscB mitochondrial iron-sulfur cluster cochaperone [Source:HGNC Symbol;Acc:HGNC:28913]	PCAdmix_DOG
	ENSCAFG00000032399	CCDC117	CCDC117	26	22145881	22160584	1		CCDC117	coiled-coil domain containing 117	coiled-coil domain containing 117 [Source:HGNC Symbol;Acc:HGNC:26599]	PCAdmix_DOG
	ENSCAFG00000011954		XBP1	26	22163264	22168100	-1		XBP1	X-box binding protein 1		PCAdmix_DOG
	ENSCAFG00000011973	ZNRF3	ZNRF3	26	22334998	22394024	1		ZNRF3	zinc and ring finger 3	zinc and ring finger 3 [Source:HGNC Symbol;Acc:HGNC:18126]	PCAdmix_DOG
	ENSCAFG00000011982	C22orf31	C22orf31	26	22398166	22409833	-1		C26H22orf31	chromosome 26 open reading frame, human C22orf31	chromosome 22 open reading frame 31 [Source:HGNC Symbol;Acc:HGNC:26931]	PCAdmix_DOG
	ENSCAFG00000011994	KREMEN1	KREMEN1	26	22408157	22480068	1		KREMEN1	kringle containing transmembrane protein 1	kringle containing transmembrane protein 1 [Source:HGNC Symbol;Acc:HGNC:17550]	PCAdmix_DOG
	ENSCAFG00000012106	EMID1	EMID1	26	22520438	22571593	1		EMID1	EMI domain containing 1	EMI domain containing 1 [Source:HGNC Symbol;Acc:HGNC:18036]	PCAdmix_DOG
	ENSCAFG00000012114	RHBDD3	RHBDD3	26	22573064	22576353	-1		RHBDD3	rhomboid domain containing 3	rhomboid domain containing 3 [Source:HGNC Symbol;Acc:HGNC:1308]	PCAdmix_DOG
	ENSCAFG00000012160		EWSR1	26	22582865	22607810	1		EWSR1	EWS RNA-binding protein 1	RNA-binding protein EWS [Source:RefSeq peptide;Acc:NP_001277055]	PCAdmix_DOG
	ENSCAFG00000012219	GAS2L1	GAS2L1	26	22615255	22623292	1		GAS2L1	growth arrest-specific 2 like 1	growth arrest specific 2 like 1 [Source:HGNC Symbol;Acc:HGNC:16955]	PCAdmix_DOG
	ENSCAFG00000012230	RASL10A	RASL10A	26	22621132	22623008	-1		RASL10A	RAS-like, family 10, member A	RAS like family 10 member A [Source:HGNC Symbol;Acc:HGNC:16954]	PCAdmix_DOG
	ENSCAFG00000012067	AP1B1	AP1B1	26	22633828	22690134	-1		AP1B1	adaptor-related protein complex 1, beta 1 subunit	adaptor related protein complex 1 beta 1 subunit [Source:HGNC Symbol;Acc:HGNC:554]	PCAdmix_DOG
	ENSCAFG00000024322	RPS27L	RPS27L	26	22644126	22644377	1				ribosomal protein S27 like [Source:HGNC Symbol;Acc:HGNC:18476]	PCAdmix_DOG
	ENSCAFG00000029476			26	22682107	22682564	1					PCAdmix_DOG
	ENSCAFG00000012243	NEFH	NEFH	26	22725628	22735128	1		NEFH	neurofilament, heavy polypeptide	neurofilament heavy polypeptide [Source:RefSeq peptide;Acc:NP_001003352]	PCAdmix_DOG
	ENSCAFG00000012262	THOC5	THOC5	26	22748175	22785305	-1		THOC5	THO complex 5	THO complex 5 [Source:HGNC Symbol;Acc:HGNC:19074]	PCAdmix_DOG
	ENSCAFG00000012291	NIPSNAP1	NIPSNAP1	26	22786991	22800195	-1		NIPSNAP1	nipsnap homolog 1 (C. elegans)	nipsnap homolog 1 (C. elegans) [Source:HGNC Symbol;Acc:HGNC:7827]	PCAdmix_DOG
	ENSCAFG00000012307	NF2	NF2	26	22816823	22896294	1		NF2	neurofibromin 2 (merlin)	neurofibromin 2 (merlin) [Source:HGNC Symbol;Acc:HGNC:7773]	PCAdmix_DOG
	ENSCAFG00000012334	CABP7	CABP7	26	22916478	22924979	1		CABP7	calcium binding protein 7	calcium binding protein 7 [Source:HGNC Symbol;Acc:HGNC:20834]	PCAdmix_DOG
	ENSCAFG00000012343	ZMAT5	ZMAT5	26	22926625	22940713	-1		ZMAT5	zinc finger, matrin-type 5	zinc finger matrin-type 5 [Source:HGNC Symbol;Acc:HGNC:28046]	PCAdmix_DOG
	ENSCAFG00000028837	UQCR10	UQCR10	26	22953517	22957685	1		UQCR10	ubiquinol-cytochrome c reductase, complex III subunit X	ubiquinol-cytochrome c reductase, complex III subunit X [Source:HGNC Symbol;Acc:HGNC:30863]	PCAdmix_DOG
	ENSCAFG00000012361	ASCC2	ASCC2	26	22967096	23004731	-1		ASCC2	activating signal cointegrator 1 complex subunit 2	activating signal cointegrator 1 complex subunit 2 [Source:HGNC Symbol;Acc:HGNC:24103]	PCAdmix_DOG
	ENSCAFG00000012420	MTMR3	MTMR3	26	23133139	23185614	1		MTMR3	myotubularin related protein 3	myotubularin related protein 3 [Source:HGNC Symbol;Acc:HGNC:7451]	PCAdmix_DOG
	ENSCAFG00000012459	HORMAD2	HORMAD2	26	23262226	23341208	1		HORMAD2	HORMA domain containing 2	HORMA domain-containing protein 2 [Source:UniProtKB/Swiss-Prot;Acc:E2QXH7]	PCAdmix_DOG
	ENSCAFG00000030931	LIF	LIF	26	23400169	23406863	-1		LIF	leukemia inhibitory factor	leukemia inhibitory factor [Source:HGNC Symbol;Acc:HGNC:6596]	PCAdmix_DOG
	ENSCAFG00000012468	OSM	OSM	26	23421701	23425833	-1		OSM	oncostatin M	oncostatin M [Source:HGNC Symbol;Acc:HGNC:8506]	PCAdmix_DOG
	ENSCAFG00000012489	GATSL3	GATSL3	26	23435238	23443828	-1		GATSL3	GATS protein-like 3	GATS protein-like 3 [Source:HGNC Symbol;Acc:HGNC:34423]	PCAdmix_DOG
	ENSCAFG00000012514		TBC1D10A	26	23446623	23479247	-1		TBC1D10A	TBC1 domain family, member 10A		PCAdmix_DOG
	ENSCAFG00000012559	SF3A1	SF3A1	26	23485065	23505031	-1		SF3A1	splicing factor 3a, subunit 1, 120kDa	splicing factor 3a subunit 1 [Source:HGNC Symbol;Acc:HGNC:10765]	PCAdmix_DOG
	ENSCAFG00000012686	CCDC157	CCDC157	26	23510229	23518851	1		CCDC157	coiled-coil domain containing 157	coiled-coil domain containing 157 [Source:HGNC Symbol;Acc:HGNC:33854]	PCAdmix_DOG
	ENSCAFG00000012692	RNF215	RNF215	26	23521248	23528655	-1				ring finger protein 215 [Source:HGNC Symbol;Acc:HGNC:33434]	PCAdmix_DOG
	ENSCAFG00000012703		SEC14L2	26	23542659	23562724	1		SEC14L2	SEC14-like lipid binding 2		PCAdmix_DOG
	ENSCAFG00000012742	MTFP1	MTFP1	26	23565665	23567575	1				mitochondrial fission process 1 [Source:HGNC Symbol;Acc:HGNC:26945]	PCAdmix_DOG
	ENSCAFG00000012757			26	23581202	23583492	-1					PCAdmix_DOG
	ENSCAFG00000023437	SEC14L4	SEC14L4	26	23596105	23612282	-1		LOC486353	SEC14-like protein 4	SEC14 like lipid binding 4 [Source:HGNC Symbol;Acc:HGNC:20627]	PCAdmix_DOG
	ENSCAFG00000030208	CST	CST	26	23634854	23643855	-1		GAL3ST1	galactose-3-O-sulfotransferase 1	galactosylceramide sulfotransferase [Source:RefSeq peptide;Acc:NP_001128598]	PCAdmix_DOG
	ENSCAFG00000012792	PES1	PES1	26	23655974	23672891	-1		PES1	pescadillo ribosomal biogenesis factor 1	pescadillo ribosomal biogenesis factor 1 [Source:HGNC Symbol;Acc:HGNC:8848]	PCAdmix_DOG
	ENSCAFG00000012827	TCN2	TCN2	26	23690849	23709816	1		TCN2	transcobalamin II	transcobalamin 2 [Source:HGNC Symbol;Acc:HGNC:11653]	PCAdmix_DOG
	ENSCAFG00000012834	SLC35E4	SLC35E4	26	23715105	23720444	1		SLC35E4	solute carrier family 35, member E4	solute carrier family 35 member E4 [Source:HGNC Symbol;Acc:HGNC:17058]	PCAdmix_DOG
	ENSCAFG00000012837	DUSP18	DUSP18	26	23735182	23735748	-1		DUSP18	dual specificity phosphatase 18	dual specificity phosphatase 18 [Source:HGNC Symbol;Acc:HGNC:18484]	PCAdmix_DOG
	ENSCAFG00000023040	C5orf52	C5orf52	26	23739637	23742444	1				chromosome 5 open reading frame 52 [Source:HGNC Symbol;Acc:HGNC:35121]	PCAdmix_DOG
	ENSCAFG00000012842	OSBP2	OSBP2	26	23761633	23936562	1		OSBP2	oxysterol binding protein 2	oxysterol binding protein 2 [Source:HGNC Symbol;Acc:HGNC:8504]	PCAdmix_DOG
	ENSCAFG00000012861	MORC2	MORC2	26	23953325	23992431	-1		MORC2	MORC family CW-type zinc finger 2	MORC family CW-type zinc finger 2 [Source:HGNC Symbol;Acc:HGNC:23573]	PCAdmix_DOG
	ENSCAFG00000012922		SMTN	26	24085016	24107726	1		SMTN	smoothelin		PCAdmix_DOG
	ENSCAFG00000012969	INPP5J	INPP5J	26	24118166	24129536	1		INPP5J	inositol polyphosphate-5-phosphatase J	inositol polyphosphate-5-phosphatase J [Source:HGNC Symbol;Acc:HGNC:8956]	PCAdmix_DOG
	ENSCAFG00000012981	PLA2G3	PLA2G3	26	24128005	24132774	-1		PLA2G3	phospholipase A2, group III	phospholipase A2 group III [Source:HGNC Symbol;Acc:HGNC:17934]	PCAdmix_DOG
	ENSCAFG00000012993	RNF185	RNF185	26	24163745	24176286	1		RNF185	ring finger protein 185	ring finger protein 185 [Source:HGNC Symbol;Acc:HGNC:26783]	PCAdmix_DOG
	ENSCAFG00000013044	LIMK2	LIMK2	26	24182741	24242274	1		LIMK2	LIM domain kinase 2	LIM domain kinase 2 [Source:HGNC Symbol;Acc:HGNC:6614]	PCAdmix_DOG
	ENSCAFG00000013077	PIK3IP1	PIK3IP1	26	24244772	24255008	-1		PIK3IP1	phosphoinositide-3-kinase interacting protein 1	phosphoinositide-3-kinase interacting protein 1 [Source:HGNC Symbol;Acc:HGNC:24942]	PCAdmix_DOG
	ENSCAFG00000013087	PATZ1	PATZ1	26	24278802	24296175	-1		PATZ1	POZ (BTB) and AT hook containing zinc finger 1	POZ/BTB and AT hook containing zinc finger 1 [Source:HGNC Symbol;Acc:HGNC:13071]	PCAdmix_DOG
	ENSCAFG00000032601	DRG1	DRG1	26	24327841	24350437	1		DRG1	developmentally regulated GTP binding protein 1	developmentally regulated GTP binding protein 1 [Source:HGNC Symbol;Acc:HGNC:3029]	PCAdmix_DOG
	ENSCAFG00000013163	EIF4ENIF1	EIF4ENIF1	26	24355826	24403077	-1		EIF4ENIF1	eukaryotic translation initiation factor 4E nuclear import factor 1	eukaryotic translation initiation factor 4E nuclear import factor 1 [Source:HGNC Symbol;Acc:HGNC:16687]	PCAdmix_DOG
	ENSCAFG00000013206	SFI1	SFI1	26	24414195	24502298	1		SFI1	SFI1 centrin binding protein	SFI1 centrin binding protein [Source:HGNC Symbol;Acc:HGNC:29064]	PCAdmix_DOG
	ENSCAFG00000013233	PISD	PISD	26	24503442	24545910	-1		PISD	phosphatidylserine decarboxylase	phosphatidylserine decarboxylase [Source:HGNC Symbol;Acc:HGNC:8999]	PCAdmix_DOG
	ENSCAFG00000013247	PRR14L	PRR14L	26	24567720	24615596	-1		PRR14L	proline rich 14-like	proline rich 14 like [Source:HGNC Symbol;Acc:HGNC:28738]	PCAdmix_DOG
	ENSCAFG00000013268	DEPDC5	DEPDC5	26	24630304	24754256	1		DEPDC5	DEP domain containing 5	DEP domain containing 5 [Source:HGNC Symbol;Acc:HGNC:18423]	PCAdmix_DOG
	ENSCAFG00000031015	YWHAH	YWHAH	26	24784721	24795778	1		YWHAH	tyrosine 3-monooxygenase/tryptophan 5-monooxygenase activation protein, eta	tyrosine 3-monooxygenase/tryptophan 5-monooxygenase activation protein eta [Source:HGNC Symbol;Acc:HGNC:12853]	PCAdmix_DOG
	ENSCAFG00000013439	SLC5A1	SLC5A1	26	24884853	24956190	1		SLC5A1	solute carrier family 5 (sodium/glucose cotransporter), member 1	solute carrier family 5 member 1 [Source:HGNC Symbol;Acc:HGNC:11036]	PCAdmix_DOG
	ENSCAFG00000023850			26	27688695	27743713	1					PCAdmix_DOG
	ENSCAFG00000013646	RSPH14	RSPH14	26	27749073	27825266	-1		RSPH14	radial spoke head 14 homolog (Chlamydomonas)	radial spoke head 14 homolog [Source:HGNC Symbol;Acc:HGNC:13437]	PCAdmix_DOG
	ENSCAFG00000013663	GNAZ	GNAZ	26	27782117	27811860	1		GNAZ	guanine nucleotide binding protein (G protein), alpha z polypeptide	G protein subunit alpha z [Source:HGNC Symbol;Acc:HGNC:4395]	PCAdmix_DOG
	ENSCAFG00000013676	RAB36	RAB36	26	27831236	27844572	1				RAB36, member RAS oncogene family [Source:HGNC Symbol;Acc:HGNC:9775]	PCAdmix_DOG
	ENSCAFG00000032603			26	27856081	27959620	-1					PCAdmix_DOG
	ENSCAFG00000013773	BCR	BCR	26	27856081	27979095	1	Leukemia chronic monocytic			BCR, RhoGEF and GTPase activating protein [Source:HGNC Symbol;Acc:HGNC:1014]	PCAdmix_DOG
	ENSCAFG00000013823	SPECC1L	SPECC1L	26	27994166	28125695	1		SPECC1L	sperm antigen with calponin homology and coiled-coil domains 1-like	Cytospin-A [Source:UniProtKB/Swiss-Prot;Acc:Q2KNA0]	PCAdmix_DOG
	ENSCAFG00000013828	ADORA2A	ADORA2A	26	28141076	28150600	1		ADORA2A	adenosine A2a receptor	Adenosine receptor A2a [Source:UniProtKB/Swiss-Prot;Acc:P11617]	PCAdmix_DOG
	ENSCAFG00000013843	UPB1	UPB1	26	28195081	28226700	1		UPB1	ureidopropionase, beta	beta-ureidopropionase 1 [Source:HGNC Symbol;Acc:HGNC:16297]	PCAdmix_DOG
	ENSCAFG00000013855		GUCD1	26	28236681	28247100	-1		GUCD1	guanylyl cyclase domain containing 1		PCAdmix_DOG
	ENSCAFG00000013864		SNRPD3	26	28250000	28263357	1		SNRPD3	small nuclear ribonucleoprotein D3 polypeptide 18kDa		PCAdmix_DOG
	ENSCAFG00000030886			26	28255924	28256049	-1					PCAdmix_DOG
	ENSCAFG00000013867	LRRC75B	LRRC75B	26	28283288	28285715	-1				leucine rich repeat containing 75B [Source:HGNC Symbol;Acc:HGNC:33155]	PCAdmix_DOG
	ENSCAFG00000030031			26	28317989	28336780	1					PCAdmix_DOG
	ENSCAFG00000029292			26	28339790	28347613	1					PCAdmix_DOG
	ENSCAFG00000013923	SUSD2	SUSD2	26	28357193	28363924	-1		SUSD2	sushi domain containing 2	sushi domain containing 2 [Source:HGNC Symbol;Acc:HGNC:30667]	PCAdmix_DOG
	ENSCAFG00000013995	CABIN1	CABIN1	26	28366218	28517667	-1		CABIN1	calcineurin binding protein 1	calcineurin binding protein 1 [Source:HGNC Symbol;Acc:HGNC:24187]	PCAdmix_DOG
	ENSCAFG00000014028		LOC100856518	26	28525147	28532680	-1		LOC100856518	glutathione S-transferase theta-1-like		PCAdmix_DOG
	ENSCAFG00000014034		LOC477556	26	28534557	28546462	-1		LOC477556	glutathione S-transferase theta-1		PCAdmix_DOG
	ENSCAFG00000023584		LOC486404	26	28553263	28565367	-1		LOC486404	glutathione S-transferase theta-4		PCAdmix_DOG
	ENSCAFG00000028814		LOC477558	26	28561578	28567376	-1		LOC477558	glutathione S-transferase theta-1-like		PCAdmix_DOG
	ENSCAFG00000014043		LOC100686488	26	28573245	28580865	-1		LOC100686488	glutathione S-transferase theta-2B-like		PCAdmix_DOG
	ENSCAFG00000029652			26	28605198	28605569	1					PCAdmix_DOG
	ENSCAFG00000014082		SLC2A11	26	28653095	28673724	-1		SLC2A11	solute carrier family 2 (facilitated glucose transporter), member 11		PCAdmix_DOG
	ENSCAFG00000014105	SMARCB1	SMARCB1	26	28688269	28728652	-1		SMARCB1	SWI/SNF related, matrix associated, actin dependent regulator of chromatin, subfamily b, member 1	SWI/SNF related, matrix associated, actin dependent regulator of chromatin, subfamily b, member 1 [Source:HGNC Symbol;Acc:HGNC:11103]	PCAdmix_DOG
	ENSCAFG00000014095	DERL3	DERL3	26	28688331	28690232	1		DERL3	derlin 3	derlin 3 [Source:HGNC Symbol;Acc:HGNC:14236]	PCAdmix_DOG
	ENSCAFG00000014117	MMP11	MMP11	26	28729877	28740264	-1		MMP11	matrix metallopeptidase 11	matrix metallopeptidase 11 [Source:HGNC Symbol;Acc:HGNC:7157]	PCAdmix_DOG
	ENSCAFG00000014124	CHCHD10	CHCHD10	26	28742586	28744180	1		CHCHD10	coiled-coil-helix-coiled-coil-helix domain containing 10	coiled-coil-helix-coiled-coil-helix domain containing 10 [Source:HGNC Symbol;Acc:HGNC:15559]	PCAdmix_DOG
	ENSCAFG00000014127	C22orf15	C22orf15	26	28745225	28746676	-1		C26H22orf15	chromosome 26 open reading frame, human C22orf15	chromosome 22 open reading frame 15 [Source:HGNC Symbol;Acc:HGNC:15558]	PCAdmix_DOG
	ENSCAFG00000014130	VPREB3	VPREB3	26	28750742	28751792	1		VPREB3	pre-B lymphocyte 3	pre-B lymphocyte 3 [Source:HGNC Symbol;Acc:HGNC:12710]	PCAdmix_DOG
	ENSCAFG00000029579	ZNF70	ZNF70	26	28756927	28758276	1		ZNF70	zinc finger protein 70	zinc finger protein 70 [Source:HGNC Symbol;Acc:HGNC:13140]	PCAdmix_DOG
	ENSCAFG00000014139		LOC100687054	26	28793499	28804574	-1		LOC100687054	immunoglobulin lambda-like polypeptide 5		PCAdmix_DOG
	ENSCAFG00000024382	VPREB1	VPREB1	26	28834151	28834679	-1		LOC486411	immunoglobulin iota chain-like	pre-B lymphocyte 1 [Source:HGNC Symbol;Acc:HGNC:12709]	PCAdmix_DOG
	ENSCAFG00000014142			26	28847327	28850041	1					PCAdmix_DOG
	ENSCAFG00000014144			26	28917858	28938780	1					PCAdmix_DOG
	ENSCAFG00000014151		DGCR6L	26	29032190	29038085	1		DGCR6L	DiGeorge syndrome critical region gene 6-like		PCAdmix_DOG
	ENSCAFG00000014154			26	29032190	29056357	-1					PCAdmix_DOG
	ENSCAFG00000014172	ZDHHC8	ZDHHC8	26	29194542	29208105	-1		ZDHHC8	zinc finger, DHHC-type containing 8	probable palmitoyltransferase ZDHHC8 [Source:RefSeq peptide;Acc:NP_001104240]	PCAdmix_DOG
	ENSCAFG00000014178	RANBP1	RANBP1	26	29210837	29219108	-1		RANBP1	RAN binding protein 1	RAN binding protein 1 [Source:HGNC Symbol;Acc:HGNC:9847]	PCAdmix_DOG
	ENSCAFG00000014190	TRMT2A	TRMT2A	26	29219812	29223925	1		TRMT2A	tRNA methyltransferase 2 homolog A (S. cerevisiae)	tRNA methyltransferase 2 homolog A [Source:HGNC Symbol;Acc:HGNC:24974]	PCAdmix_DOG
	ENSCAFG00000014196	DGCR8	DGCR8	26	29226446	29255836	-1				DGCR8 microprocessor complex subunit [Source:HGNC Symbol;Acc:HGNC:2847]	PCAdmix_DOG
	ENSCAFG00000014212	TANGO2	TANGO2	26	29265339	29304164	-1				transport and golgi organization 2 homolog [Source:HGNC Symbol;Acc:HGNC:25439]	PCAdmix_DOG
	ENSCAFG00000014232	ARVCF	ARVCF	26	29314144	29534294	1		ARVCF	armadillo repeat gene deleted in velocardiofacial syndrome	armadillo repeat gene deleted in velocardiofacial syndrome [Source:HGNC Symbol;Acc:HGNC:728]	PCAdmix_DOG
	ENSCAFG00000014253	COMT	COMT	26	29360372	29366006	-1		COMT	catechol-O-methyltransferase	catechol O-methyltransferase [Source:RefSeq peptide;Acc:NP_001004074]	PCAdmix_DOG
	ENSCAFG00000014373	TXNRD2	TXNRD2	26	29383339	29428805	1		TXNRD2	thioredoxin reductase 2	thioredoxin reductase 2 [Source:HGNC Symbol;Acc:HGNC:18155]	PCAdmix_DOG
	ENSCAFG00000014499	GNB1L	GNB1L	26	29454954	29511968	1		GNB1L	guanine nucleotide binding protein (G protein), beta polypeptide 1-like	G protein subunit beta 1 like [Source:HGNC Symbol;Acc:HGNC:4397]	PCAdmix_DOG
	ENSCAFG00000014503	TBX1	TBX1	26	29529159	29532696	-1				T-box 1 [Source:HGNC Symbol;Acc:HGNC:11592]	PCAdmix_DOG
	ENSCAFG00000028556			26	29538871	29547529	-1					PCAdmix_DOG
	ENSCAFG00000014571	CDC45	CDC45	26	29709233	29738962	-1		CDC45	cell division cycle 45	cell division cycle 45 [Source:HGNC Symbol;Acc:HGNC:1739]	PCAdmix_DOG
	ENSCAFG00000014596	UFD1L	UFD1L	26	29739273	29763266	1		UFD1L	ubiquitin fusion degradation 1 like (yeast)	ubiquitin fusion degradation 1 like (yeast) [Source:HGNC Symbol;Acc:HGNC:12520]	PCAdmix_DOG
	ENSCAFG00000014611	C22orf39	C22orf39	26	29766100	29769135	1				chromosome 22 open reading frame 39 [Source:HGNC Symbol;Acc:HGNC:27012]	PCAdmix_DOG
	ENSCAFG00000014614		MRPL40	26	29773513	29778757	-1		MRPL40	mitochondrial ribosomal protein L40		PCAdmix_DOG
	ENSCAFG00000014619	HIRA	HIRA	26	29778086	29867339	1		LOC486424	protein HIRA	histone cell cycle regulator [Source:HGNC Symbol;Acc:HGNC:4916]	PCAdmix_DOG
	ENSCAFG00000014736	CLTCL1	CLTCL1	26	29906972	30001363	1		CLTCL1	clathrin, heavy chain-like 1	clathrin heavy chain like 1 [Source:HGNC Symbol;Acc:HGNC:2093]	PCAdmix_DOG
	ENSCAFG00000023963	SLC25A1	SLC25A1	26	30002792	30005414	1		SLC25A1	solute carrier family 25 (mitochondrial carrier; citrate transporter), member 1	solute carrier family 25 member 1 [Source:HGNC Symbol;Acc:HGNC:10979]	PCAdmix_DOG
	ENSCAFG00000028521			26	30032584	30033981	-1					PCAdmix_DOG
	ENSCAFG00000030545			26	30032796	30034302	1					PCAdmix_DOG
	ENSCAFG00000014804	DGCR14	DGCR14	26	30037226	30048204	1		DGCR14	DiGeorge syndrome critical region gene 14	DiGeorge syndrome critical region gene 14 [Source:HGNC Symbol;Acc:HGNC:16817]	PCAdmix_DOG
	ENSCAFG00000023784		TSSK2	26	30050326	30051402	-1		TSSK2	testis-specific serine kinase 2		PCAdmix_DOG
	ENSCAFG00000014833	DGCR2	DGCR2	26	30054116	30140533	1		DGCR2	DiGeorge syndrome critical region gene 2	DiGeorge syndrome critical region gene 2 [Source:HGNC Symbol;Acc:HGNC:2845]	PCAdmix_DOG
	ENSCAFG00000031943			26	30146217	30165800	1					PCAdmix_DOG
	ENSCAFG00000032314	ZNF135	ZNF135	26	30170326	30197601	1		LOC486429	zinc finger protein OZF-like	zinc finger protein 135 [Source:HGNC Symbol;Acc:HGNC:12919]	PCAdmix_DOG
	ENSCAFG00000030432	ZNF74	ZNF74	26	30203787	30215776	1				zinc finger protein 74 [Source:HGNC Symbol;Acc:HGNC:13144]	PCAdmix_DOG
	ENSCAFG00000014896	SCARF2	SCARF2	26	30233599	30239345	-1				scavenger receptor class F member 2 [Source:HGNC Symbol;Acc:HGNC:19869]	PCAdmix_DOG
	ENSCAFG00000014906	KLHL22	KLHL22	26	30248204	30281837	-1		KLHL22	kelch-like family member 22	kelch like family member 22 [Source:HGNC Symbol;Acc:HGNC:25888]	PCAdmix_DOG
	ENSCAFG00000014932	MED15	MED15	26	30322894	30367572	1		MED15	mediator complex subunit 15	mediator complex subunit 15 [Source:HGNC Symbol;Acc:HGNC:14248]	PCAdmix_DOG
	ENSCAFG00000014946		LOC608483	26	30369482	30374667	-1		LOC608483	coiled-coil domain-containing protein 74B		PCAdmix_DOG
	ENSCAFG00000014966	SMPD4	SMPD4	26	30393776	30419082	-1		SMPD4	sphingomyelin phosphodiesterase 4, neutral membrane (neutral sphingomyelinase-3)	sphingomyelin phosphodiesterase 4 [Source:HGNC Symbol;Acc:HGNC:32949]	PCAdmix_DOG
	ENSCAFG00000014991		MZT2B	26	30420261	30427840	1		MZT2B	mitotic spindle organizing protein 2B		PCAdmix_DOG
	ENSCAFG00000031767	TUBA3C	TUBA3C	26	30428085	30437295	-1		LOC608051	tubulin alpha-3 chain	tubulin alpha 3c [Source:HGNC Symbol;Acc:HGNC:12408]	PCAdmix_DOG
	ENSCAFG00000014995	LRRC74B	LRRC74B	26	30441735	30456190	-1		LRRC74B	leucine rich repeat containing 74B	leucine rich repeat containing 74B [Source:HGNC Symbol;Acc:HGNC:34301]	PCAdmix_DOG
	ENSCAFG00000015060	P2RX6	P2RX6	26	30457131	30466116	1				purinergic receptor P2X 6 [Source:HGNC Symbol;Acc:HGNC:8538]	PCAdmix_DOG
	ENSCAFG00000015014	SLC7A4	SLC7A4	26	30464514	30472832	-1		SLC7A4	solute carrier family 7, member 4	solute carrier family 7 member 4 [Source:HGNC Symbol;Acc:HGNC:11062]	PCAdmix_DOG
	ENSCAFG00000015086	TUBA3E	TUBA3E	26	30485848	30497645	1		LOC477570	tubulin alpha-3 chain-like	tubulin alpha 3e [Source:HGNC Symbol;Acc:HGNC:20765]	PCAdmix_DOG
	ENSCAFG00000030978	THAP7	THAP7	26	30498988	30505878	1		THAP7	THAP domain containing 7	THAP domain containing 7 [Source:HGNC Symbol;Acc:HGNC:23190]	PCAdmix_DOG
	ENSCAFG00000015154	LZTR1	LZTR1	26	30503150	30519611	-1		LZTR1	leucine-zipper-like transcription regulator 1	leucine-zipper-like transcription regulator 1 [Source:HGNC Symbol;Acc:HGNC:6742]	PCAdmix_DOG
	ENSCAFG00000030423	AIFM3	AIFM3	26	30520872	30532466	-1				apoptosis inducing factor, mitochondria associated 3 [Source:HGNC Symbol;Acc:HGNC:26398]	PCAdmix_DOG
	ENSCAFG00000015188	CRKL	CRKL	26	30541999	30581964	-1		CRKL	v-crk avian sarcoma virus CT10 oncogene homolog-like	v-crk avian sarcoma virus CT10 oncogene homolog-like [Source:HGNC Symbol;Acc:HGNC:2363]	PCAdmix_DOG
	ENSCAFG00000015201	SNAP29	SNAP29	26	30606194	30630262	-1		SNAP29	synaptosomal-associated protein, 29kDa	synaptosome associated protein 29 [Source:HGNC Symbol;Acc:HGNC:11133]	PCAdmix_DOG
	ENSCAFG00000015248	PI4KA	PI4KA	26	30630261	30748743	1		PI4KA	phosphatidylinositol 4-kinase, catalytic, alpha	phosphatidylinositol 4-kinase alpha [Source:HGNC Symbol;Acc:HGNC:8983]	PCAdmix_DOG
	ENSCAFG00000015271	SERPIND1	SERPIND1	26	30686726	30694495	-1		SERPIND1	serpin peptidase inhibitor, clade D (heparin cofactor), member 1	serpin family D member 1 [Source:HGNC Symbol;Acc:HGNC:4838]	PCAdmix_DOG
	ENSCAFG00000030047			26	30758099	30758826	-1					PCAdmix_DOG
	ENSCAFG00000032559			26	30758118	30759296	1					PCAdmix_DOG
	ENSCAFG00000032493	HIC2	HIC2	26	30771491	30804788	-1		HIC2	hypermethylated in cancer 2	hypermethylated in cancer 2 [Source:HGNC Symbol;Acc:HGNC:18595]	PCAdmix_DOG
	ENSCAFG00000015284	UBE2L5P	UBE2L5P	26	30835314	30898001	1		UBE2L3	ubiquitin-conjugating enzyme E2L 3	ubiquitin conjugating enzyme E2 L5, pseudogene [Source:HGNC Symbol;Acc:HGNC:13477]	PCAdmix_DOG
	ENSCAFG00000015293	YDJC	YDJC	26	30904377	30906708	-1		YDJC	YdjC homolog (bacterial)	YdjC homolog (bacterial) [Source:HGNC Symbol;Acc:HGNC:27158]	PCAdmix_DOG
	ENSCAFG00000015302	CCDC116	CCDC116	26	30907984	30913346	1		CCDC116	coiled-coil domain containing 116	coiled-coil domain containing 116 [Source:HGNC Symbol;Acc:HGNC:26688]	PCAdmix_DOG
	ENSCAFG00000015309	SDF2L1	SDF2L1	26	30918517	30921002	1				stromal cell derived factor 2 like 1 [Source:HGNC Symbol;Acc:HGNC:10676]	PCAdmix_DOG
	ENSCAFG00000015364	PPIL2	PPIL2	26	30939547	30964084	1		PPIL2	peptidylprolyl isomerase (cyclophilin)-like 2	peptidylprolyl isomerase like 2 [Source:HGNC Symbol;Acc:HGNC:9261]	PCAdmix_DOG
	ENSCAFG00000015397	YPEL1	YPEL1	26	30968587	30973327	-1		YPEL1	yippee-like 1	yippee like 1 [Source:HGNC Symbol;Acc:HGNC:12845]	PCAdmix_DOG
	ENSCAFG00000015421	MAPK1	MAPK1	26	31013607	31132998	-1		MAPK1	mitogen-activated protein kinase 1	mitogen-activated protein kinase 1 [Source:HGNC Symbol;Acc:HGNC:6871]	PCAdmix_DOG
	ENSCAFG00000015433		EEF1B2	26	31062296	31062973	1		EEF1B2	eukaryotic translation elongation factor 1 beta 2		PCAdmix_DOG
	ENSCAFG00000015440	PPM1F	PPM1F	26	31166593	31187041	-1		PPM1F	protein phosphatase, Mg2+/Mn2+ dependent, 1F	protein phosphatase, Mg2+/Mn2+ dependent 1F [Source:HGNC Symbol;Acc:HGNC:19388]	PCAdmix_DOG
	ENSCAFG00000015482	TOP3B	TOP3B	26	31195035	31215133	-1		TOP3B	topoisomerase (DNA) III beta	topoisomerase (DNA) III beta [Source:HGNC Symbol;Acc:HGNC:11993]	PCAdmix_DOG
	ENSCAFG00000028972			26	31311469	31317318	-1					PCAdmix_DOG
	ENSCAFG00000015521	ZWINT	ZWINT	26	32432200	32434918	1		ZWINT	ZW10 interacting kinetochore protein	ZW10 interacting kinetochore protein [Source:HGNC Symbol;Acc:HGNC:13195]	PCAdmix_DOG
	ENSCAFG00000015538	PCDH15	PCDH15	26	33962360	34571935	1				protocadherin related 15 [Source:HGNC Symbol;Acc:HGNC:14674]	PCAdmix_DOG
	ENSCAFG00000015553	DKK1	DKK1	26	35696876	35876983	-1				dickkopf WNT signaling pathway inhibitor 1 [Source:HGNC Symbol;Acc:HGNC:2891]	PCAdmix_DOG
	ENSCAFG00000031979	PRKG1	PRKG1	26	35732932	36175695	-1				protein kinase, cGMP-dependent, type I [Source:HGNC Symbol;Acc:HGNC:9414]	PCAdmix_DOG
	ENSCAFG00000015567	CSTF2T	CSTF2T	26	36264175	36266222	1				cleavage stimulation factor subunit 2, tau variant [Source:HGNC Symbol;Acc:HGNC:17086]	PCAdmix_DOG
	ENSCAFG00000030804	RNLS	RNLS	26	38167838	38414077	-1		RNLS	renalase, FAD-dependent amine oxidase	renalase, FAD dependent amine oxidase [Source:HGNC Symbol;Acc:HGNC:25641]	PCAdmix_DOG
	ENSCAFG00000023689	LIPJ	LIPJ	26	38419869	38441297	1		LIPJ	lipase, family member J	lipase family member J [Source:HGNC Symbol;Acc:HGNC:21773]	PCAdmix_DOG
	ENSCAFG00000015682	LIPF	LIPF	26	38469876	38486837	1		LIPF	lipase, gastric	gastric triacylglycerol lipase precursor [Source:RefSeq peptide;Acc:NP_001003209]	PCAdmix_DOG
	ENSCAFG00000015685	LIPK	LIPK	26	38534129	38555735	1				lipase family member K [Source:HGNC Symbol;Acc:HGNC:23444]	PCAdmix_DOG
	ENSCAFG00000023511	LIPM	LIPM	26	38608457	38622343	1		LIPM	lipase, family member M	lipase family member M [Source:HGNC Symbol;Acc:HGNC:23455]	PCAdmix_DOG
	ENSCAFG00000029297	ANKRD22	ANKRD22	26	38620269	38644312	-1		ANKRD22	ankyrin repeat domain 22	ankyrin repeat domain 22 [Source:HGNC Symbol;Acc:HGNC:28321]	PCAdmix_DOG
	ENSCAFG00000029090			26	38623267	38624739	1					PCAdmix_DOG
	ENSCAFG00000030844			26	38665504	38666193	1					PCAdmix_DOG
	ENSCAFG00000015699	STAMBPL1	STAMBPL1	26	38677501	38696510	1		STAMBPL1	STAM binding protein-like 1	STAM binding protein like 1 [Source:HGNC Symbol;Acc:HGNC:24105]	PCAdmix_DOG
	ENSCAFG00000015708	ACTA2	ACTA2	26	38697855	38711474	-1		ACTA2	actin, alpha 2, smooth muscle, aorta	actin, alpha 2, smooth muscle, aorta [Source:HGNC Symbol;Acc:HGNC:130]	PCAdmix_DOG
	ENSCAFG00000015712	FAS	FAS	26	38738810	38763344	1		FAS	Fas cell surface death receptor	Fas cell surface death receptor [Source:HGNC Symbol;Acc:HGNC:11920]	PCAdmix_DOG
	ENSCAFG00000015717	CH25H	CH25H	26	38884890	38885702	-1		CH25H	cholesterol 25-hydroxylase	cholesterol 25-hydroxylase [Source:RefSeq peptide;Acc:NP_001300756]	PCAdmix_DOG
	ENSCAFG00000015721	LIPA	LIPA	26	38892721	38918435	-1		LIPA	lipase A, lysosomal acid, cholesterol esterase	lipase A, lysosomal acid type [Source:HGNC Symbol;Acc:HGNC:6617]	PCAdmix_DOG
	ENSCAFG00000015281	KCNA5	KCNA5	27	39792638	39811039	-1		KCNA5	potassium channel, voltage gated shaker related subfamily A, member 5	potassium voltage-gated channel subfamily A member 5 [Source:RefSeq peptide;Acc:NP_001006646]	PCAdmix_DOG
	ENSCAFG00000015289	KCNA1	KCNA1	27	39933825	39935312	-1		KCNA1	potassium channel, voltage gated shaker related subfamily A, member 1	Canis lupus familiaris potassium voltage-gated channel, shaker-related subfamily, member 1 (episodic ataxia with myokymia) (KCNA1), mRNA. [Source:RefSeq mRNA;Acc:NM_001313824]	PCAdmix_DOG
	ENSCAFG00000006544	PTPN20	PTPN20	28	67356	162314	-1				protein tyrosine phosphatase, non-receptor type 20 [Source:HGNC Symbol;Acc:HGNC:23423]	PCAdmix_DOG
	ENSCAFG00000028974			28	184339	212165	-1					PCAdmix_DOG
	ENSCAFG00000006551	MAPK8	MAPK8	28	323986	410811	1		MAPK8	mitogen-activated protein kinase 8	mitogen-activated protein kinase 8 [Source:HGNC Symbol;Acc:HGNC:6881]	PCAdmix_DOG
	ENSCAFG00000006568	ARHGAP22	ARHGAP22	28	420061	555749	-1				Rho GTPase activating protein 22 [Source:HGNC Symbol;Acc:HGNC:30320]	PCAdmix_DOG
	ENSCAFG00000006576	WDFY4	WDFY4	28	614395	900471	1		WDFY4	WDFY family member 4	WDFY family member 4 [Source:HGNC Symbol;Acc:HGNC:29323]	PCAdmix_DOG
	ENSCAFG00000006600	LRRC18	LRRC18	28	830105	834293	-1		LRRC18	leucine rich repeat containing 18	leucine rich repeat containing 18 [Source:HGNC Symbol;Acc:HGNC:23199]	PCAdmix_DOG
	ENSCAFG00000006604			28	933756	1024883	-1					PCAdmix_DOG
	ENSCAFG00000024930	C10orf128	C10orf128	28	1069178	1106990	-1		C28H10orf128	chromosome 28 open reading frame, human C10orf128	chromosome 10 open reading frame 128 [Source:HGNC Symbol;Acc:HGNC:27274]	PCAdmix_DOG
	ENSCAFG00000006614	GALNT7	GALNT7	28	1157842	1159815	-1		LOC102152620	N-acetylgalactosaminyltransferase 7	polypeptide N-acetylgalactosaminyltransferase 7 [Source:HGNC Symbol;Acc:HGNC:4129]	PCAdmix_DOG
	ENSCAFG00000029397			28	1226593	1226775	-1					PCAdmix_DOG
	ENSCAFG00000028751	C10orf71	C10orf71	28	1245117	1249388	1		C28H10orf71	chromosome 28 open reading frame, human C10orf71	chromosome 10 open reading frame 71 [Source:HGNC Symbol;Acc:HGNC:26973]	PCAdmix_DOG
	ENSCAFG00000006619	DRGX	DRGX	28	1283910	1314304	-1		DRGX	dorsal root ganglia homeobox	dorsal root ganglia homeobox [Source:HGNC Symbol;Acc:HGNC:21536]	PCAdmix_DOG
	ENSCAFG00000006624	ERCC6	ERCC6	28	1361107	1432259	-1		ERCC6	excision repair cross-complementation group 6	ERCC excision repair 6, chromatin remodeling factor [Source:HGNC Symbol;Acc:HGNC:3438]	PCAdmix_DOG
	ENSCAFG00000030265			28	1437187	1437405	1					PCAdmix_DOG
	ENSCAFG00000006630	SLC18A3	SLC18A3	28	1476955	1478505	1		SLC18A3	solute carrier family 18 (vesicular acetylcholine transporter), member 3	solute carrier family 18 member A3 [Source:HGNC Symbol;Acc:HGNC:10936]	PCAdmix_DOG
	ENSCAFG00000006672	CHAT	CHAT	28	1480274	1528776	1	Myasthenic syndrome congenital			choline O-acetyltransferase [Source:HGNC Symbol;Acc:HGNC:1912]	PCAdmix_DOG
	ENSCAFG00000025514		C28H10orf53	28	1538513	1551761	1		C28H10orf53	chromosome 28 open reading frame, human C10orf53		PCAdmix_DOG
	ENSCAFG00000006729	OGDHL	OGDHL	28	1567613	1600502	-1		OGDHL	oxoglutarate dehydrogenase-like	oxoglutarate dehydrogenase-like [Source:HGNC Symbol;Acc:HGNC:25590]	PCAdmix_DOG
	ENSCAFG00000006764	PARG	PARG	28	1648096	1766895	-1		PARG	poly (ADP-ribose) glycohydrolase	poly(ADP-ribose) glycohydrolase [Source:HGNC Symbol;Acc:HGNC:8605]	PCAdmix_DOG
	ENSCAFG00000029477			28	1767372	1795954	1					PCAdmix_DOG
	ENSCAFG00000007178	KIF20B	KIF20B	28	4589681	4670399	1		KIF20B	kinesin family member 20B	kinesin family member 20B [Source:HGNC Symbol;Acc:HGNC:7212]	PCAdmix_DOG
	ENSCAFG00000030727			28	4703326	4704174	1					PCAdmix_DOG
	ENSCAFG00000007218			28	5066338	5066856	1					PCAdmix_DOG
	ENSCAFG00000007224	HTR7	HTR7	28	5438844	5524191	-1		HTR7	5-hydroxytryptamine (serotonin) receptor 7, adenylate cyclase-coupled	5-hydroxytryptamine receptor 7 [Source:HGNC Symbol;Acc:HGNC:5302]	PCAdmix_DOG
	ENSCAFG00000031801	RPP30	RPP30	28	5535711	5566808	1		RPP30	ribonuclease P/MRP 30kDa subunit	ribonuclease P/MRP subunit p30 [Source:HGNC Symbol;Acc:HGNC:17688]	PCAdmix_DOG
	ENSCAFG00000007247	ANKRD1	ANKRD1	28	5569726	5578066	-1		ANKRD1	ankyrin repeat domain 1 (cardiac muscle)	ankyrin repeat domain 1 [Source:HGNC Symbol;Acc:HGNC:15819]	PCAdmix_DOG
	ENSCAFG00000029511			28	5820287	5821372	1					PCAdmix_DOG
	ENSCAFG00000007254	PCGF5	PCGF5	28	5822974	5883701	1		PCGF5	polycomb group ring finger 5	polycomb group ring finger 5 [Source:HGNC Symbol;Acc:HGNC:28264]	PCAdmix_DOG
	ENSCAFG00000007266	HECTD2	HECTD2	28	5998186	6068689	1				HECT domain E3 ubiquitin protein ligase 2 [Source:HGNC Symbol;Acc:HGNC:26736]	PCAdmix_DOG
	ENSCAFG00000029146	PPP1R3C	PPP1R3C	28	6167089	6171934	-1		PPP1R3C	protein phosphatase 1, regulatory subunit 3C	protein phosphatase 1 regulatory subunit 3C [Source:HGNC Symbol;Acc:HGNC:9293]	PCAdmix_DOG
	ENSCAFG00000007502	HHEX	HHEX	28	7057300	7062422	1		HHEX	hematopoietically expressed homeobox	hematopoietically expressed homeobox [Source:HGNC Symbol;Acc:HGNC:4901]	PCAdmix_DOG
	ENSCAFG00000007534	EXOC6	EXOC6	28	7207213	7414871	1		EXOC6	exocyst complex component 6	exocyst complex component 6 [Source:RefSeq peptide;Acc:NP_001300715]	PCAdmix_DOG
	ENSCAFG00000007554			28	7333595	7334176	-1					PCAdmix_DOG
	ENSCAFG00000007574	CYP26A1	CYP26A1	28	7428543	7432724	1		CYP26A1	cytochrome P450, family 26, subfamily A, polypeptide 1	cytochrome P450 family 26 subfamily A member 1 [Source:HGNC Symbol;Acc:HGNC:2603]	PCAdmix_DOG
	ENSCAFG00000007749	MYOF	MYOF	28	7602631	7745056	-1		MYOF	myoferlin	myoferlin [Source:HGNC Symbol;Acc:HGNC:3656]	PCAdmix_DOG
	ENSCAFG00000007881	CEP55	CEP55	28	7754839	7777541	1		CEP55	centrosomal protein 55kDa	centrosomal protein 55 [Source:HGNC Symbol;Acc:HGNC:1161]	PCAdmix_DOG
	ENSCAFG00000007888	FFAR4	FFAR4	28	7801713	7820021	1		FFAR4	free fatty acid receptor 4	omega-3 fatty acid receptor 1 [Source:RefSeq peptide;Acc:NP_001245268]	PCAdmix_DOG
	ENSCAFG00000007893	RBP4	RBP4	28	7823195	7830387	-1		RBP4	retinol binding protein 4, plasma	retinol binding protein 4 [Source:HGNC Symbol;Acc:HGNC:9922]	PCAdmix_DOG
	ENSCAFG00000007908	PDE6C	PDE6C	28	7846460	7887557	1				phosphodiesterase 6C [Source:HGNC Symbol;Acc:HGNC:8787]	PCAdmix_DOG
	ENSCAFG00000007929	FRA10AC1	FRA10AC1	28	7891598	7929376	-1		FRA10AC1	fragile site, folic acid type, rare, fra(10)(q23.3) or fra(10)(q24.2) candidate 1	fragile site, folic acid type, rare, fra(10)(q23.3) or fra(10)(q24.2) candidate 1 [Source:HGNC Symbol;Acc:HGNC:1162]	PCAdmix_DOG
	ENSCAFG00000007949	LGI1	LGI1	28	7966406	8007703	1		LGI1	leucine-rich, glioma inactivated 1	leucine rich glioma inactivated 1 [Source:HGNC Symbol;Acc:HGNC:6572]	PCAdmix_DOG
	ENSCAFG00000007957	SLC35G1	SLC35G1	28	8080684	8089008	1				solute carrier family 35 member G1 [Source:HGNC Symbol;Acc:HGNC:26607]	PCAdmix_DOG
	ENSCAFG00000007985	PLCE1	PLCE1	28	8209707	8481770	1		PLCE1	phospholipase C, epsilon 1	phospholipase C epsilon 1 [Source:HGNC Symbol;Acc:HGNC:17175]	PCAdmix_DOG
	ENSCAFG00000008033	NOC3L	NOC3L	28	8488880	8519692	-1		NOC3L	NOC3-like DNA replication regulator	NOC3 like DNA replication regulator [Source:HGNC Symbol;Acc:HGNC:24034]	PCAdmix_DOG
	ENSCAFG00000008068	TBC1D12	TBC1D12	28	8544872	8641062	1				TBC1 domain family member 12 [Source:HGNC Symbol;Acc:HGNC:29082]	PCAdmix_DOG
	ENSCAFG00000008090	HELLS	HELLS	28	8661008	8705639	1		HELLS	helicase, lymphoid-specific	helicase, lymphoid-specific [Source:HGNC Symbol;Acc:HGNC:4861]	PCAdmix_DOG
	ENSCAFG00000008099	CYP2C18	CYP2C18	28	8727010	8750427	-1		CYP2C18	cytochrome P450 2C21	cytochrome P450 2C21 [Source:RefSeq peptide;Acc:NP_001183973]	PCAdmix_DOG
	ENSCAFG00000028553	PDLIM1	PDLIM1	28	8770735	8801180	-1				PDZ and LIM domain 1 [Source:HGNC Symbol;Acc:HGNC:2067]	PCAdmix_DOG
	ENSCAFG00000008270	SORBS1	SORBS1	28	8837752	8949488	-1				sorbin and SH3 domain containing 1 [Source:HGNC Symbol;Acc:HGNC:14565]	PCAdmix_DOG
	ENSCAFG00000008339	ALDH18A1	ALDH18A1	28	9101550	9144328	-1		ALDH18A1	aldehyde dehydrogenase 18 family, member A1	aldehyde dehydrogenase 18 family member A1 [Source:HGNC Symbol;Acc:HGNC:9722]	PCAdmix_DOG
	ENSCAFG00000031616			28	9147259	9148356	1					PCAdmix_DOG
	ENSCAFG00000008406	TCTN3	TCTN3	28	9154793	9181704	-1		TCTN3	tectonic family member 3	tectonic family member 3 [Source:HGNC Symbol;Acc:HGNC:24519]	PCAdmix_DOG
	ENSCAFG00000008433		ENTPD1	28	9211349	9311132	1		ENTPD1	ectonucleoside triphosphate diphosphohydrolase 1		PCAdmix_DOG
	ENSCAFG00000008419			28	9214052	9214594	1					PCAdmix_DOG
	ENSCAFG00000008439		LOC102151298	28	9296589	9371843	-1		LOC102151298	RNA/RNP complex-1-interacting phosphatase-like		PCAdmix_DOG
	ENSCAFG00000030675			28	9379847	9390497	1					PCAdmix_DOG
	ENSCAFG00000030388			28	9464519	9482996	1					PCAdmix_DOG
	ENSCAFG00000008454	CCNJ	CCNJ	28	9491528	9511585	1		CCNJ	cyclin J	cyclin J [Source:HGNC Symbol;Acc:HGNC:23434]	PCAdmix_DOG
	ENSCAFG00000031868	ZNF518A	ZNF518A	28	9592924	9597396	1		ZNF518A	zinc finger protein 518A	zinc finger protein 518A [Source:HGNC Symbol;Acc:HGNC:29009]	PCAdmix_DOG
	ENSCAFG00000008477	BLNK	BLNK	28	9623067	9700531	-1		BLNK	B-cell linker	B-cell linker [Source:HGNC Symbol;Acc:HGNC:14211]	PCAdmix_DOG
	ENSCAFG00000008507	DNTT	DNTT	28	9729974	9759917	1		DNTT	DNA nucleotidylexotransferase	DNA nucleotidylexotransferase [Source:HGNC Symbol;Acc:HGNC:2983]	PCAdmix_DOG
	ENSCAFG00000008621			28	9790896	9847993	-1					PCAdmix_DOG
	ENSCAFG00000030219			28	9897151	9898557	1					PCAdmix_DOG
	ENSCAFG00000008738	TM9SF3	TM9SF3	28	9902563	9970730	-1		TM9SF3	transmembrane 9 superfamily member 3	transmembrane 9 superfamily member 3 [Source:HGNC Symbol;Acc:HGNC:21529]	PCAdmix_DOG
	ENSCAFG00000008880	PIK3AP1	PIK3AP1	28	9978900	10085980	-1				phosphoinositide-3-kinase adaptor protein 1 [Source:HGNC Symbol;Acc:HGNC:30034]	PCAdmix_DOG
	ENSCAFG00000008905		LOC486817	28	10300955	10307847	1		LOC486817	ligand-dependent corepressor		PCAdmix_DOG
	ENSCAFG00000031956	LCOR	LCOR	28	10331364	10335626	1		LOC486817	ligand-dependent corepressor	ligand dependent nuclear receptor corepressor [Source:HGNC Symbol;Acc:HGNC:29503]	PCAdmix_DOG
	ENSCAFG00000008945	SLIT1	SLIT1	28	10349670	10519332	-1		SLIT1	slit guidance ligand 1	slit guidance ligand 1 [Source:HGNC Symbol;Acc:HGNC:11085]	PCAdmix_DOG
	ENSCAFG00000009016		ARHGAP19	28	10559817	10621286	-1		ARHGAP19	Rho GTPase activating protein 19		PCAdmix_DOG
	ENSCAFG00000009043	RRP12	RRP12	28	10672468	10717358	-1		RRP12	ribosomal RNA processing 12 homolog	ribosomal RNA processing 12 homolog [Source:HGNC Symbol;Acc:HGNC:29100]	PCAdmix_DOG
	ENSCAFG00000009062	PGAM1	PGAM1	28	10720326	10726754	1		PGAM1	phosphoglycerate mutase 1 (brain)	phosphoglycerate mutase 1 [Source:HGNC Symbol;Acc:HGNC:8888]	PCAdmix_DOG
	ENSCAFG00000009068	EXOSC1	EXOSC1	28	10731524	10738921	-1		EXOSC1	exosome component 1	exosome component 1 [Source:HGNC Symbol;Acc:HGNC:17286]	PCAdmix_DOG
	ENSCAFG00000009087	ZDHHC16	ZDHHC16	28	10743290	10748647	1		ZDHHC16	zinc finger, DHHC-type containing 16	zinc finger DHHC-type containing 16 [Source:HGNC Symbol;Acc:HGNC:20714]	PCAdmix_DOG
	ENSCAFG00000009130	MMS19	MMS19	28	10749672	10783799	-1		MMS19	MMS19 homolog, cytosolic iron-sulfur assembly component	MMS19 homolog, cytosolic iron-sulfur assembly component [Source:HGNC Symbol;Acc:HGNC:13824]	PCAdmix_DOG
	ENSCAFG00000009175	UBTD1	UBTD1	28	10834411	10836468	1		UBTD1	ubiquitin domain containing 1	ubiquitin domain containing 1 [Source:HGNC Symbol;Acc:HGNC:25683]	PCAdmix_DOG
	ENSCAFG00000009185	ANKRD2	ANKRD2	28	10838692	10848544	1		ANKRD2	ankyrin repeat domain 2 (stretch responsive muscle)	ankyrin repeat domain 2 [Source:HGNC Symbol;Acc:HGNC:495]	PCAdmix_DOG
	ENSCAFG00000009205	HOGA1	HOGA1	28	10849004	10886627	1		HOGA1	4-hydroxy-2-oxoglutarate aldolase 1	4-hydroxy-2-oxoglutarate aldolase 1 [Source:HGNC Symbol;Acc:HGNC:25155]	PCAdmix_DOG
	ENSCAFG00000025366	C10orf62	C10orf62	28	10852839	10853594	1				chromosome 10 open reading frame 62 [Source:HGNC Symbol;Acc:HGNC:23294]	PCAdmix_DOG
	ENSCAFG00000009218	MORN4	MORN4	28	10874653	10877370	-1				MORN repeat containing 4 [Source:HGNC Symbol;Acc:HGNC:24001]	PCAdmix_DOG
	ENSCAFG00000031220			28	10946964	10947227	1					PCAdmix_DOG
	ENSCAFG00000009246	ZFYVE27	ZFYVE27	28	10966122	11036024	1				zinc finger FYVE-type containing 27 [Source:HGNC Symbol;Acc:HGNC:26559]	PCAdmix_DOG
	ENSCAFG00000009259	SFRP5	SFRP5	28	10994930	10999541	-1		SFRP5	secreted frizzled-related protein 5	secreted frizzled related protein 5 [Source:HGNC Symbol;Acc:HGNC:10779]	PCAdmix_DOG
	ENSCAFG00000009271	CRTAC1	CRTAC1	28	11067587	11227067	-1		CRTAC1	cartilage acidic protein 1	cartilage acidic protein 1 [Source:HGNC Symbol;Acc:HGNC:14882]	PCAdmix_DOG
	ENSCAFG00000009262	GOLGA7B	GOLGA7B	28	11070935	11078691	1				golgin A7 family member B [Source:HGNC Symbol;Acc:HGNC:31668]	PCAdmix_DOG
	ENSCAFG00000009302	R3HCC1L	R3HCC1L	28	11365165	11395751	1		R3HCC1L	R3H domain and coiled-coil containing 1-like	R3H domain and coiled-coil containing 1 like [Source:HGNC Symbol;Acc:HGNC:23512]	PCAdmix_DOG
	ENSCAFG00000009324	LOXL4	LOXL4	28	11400446	11419710	-1		LOXL4	lysyl oxidase-like 4	lysyl oxidase like 4 [Source:HGNC Symbol;Acc:HGNC:17171]	PCAdmix_DOG
	ENSCAFG00000009350	PYROXD2	PYROXD2	28	11518031	11545337	-1		PYROXD2	pyridine nucleotide-disulphide oxidoreductase domain 2	pyridine nucleotide-disulphide oxidoreductase domain 2 [Source:HGNC Symbol;Acc:HGNC:23517]	PCAdmix_DOG
	ENSCAFG00000009367	HPS1	HPS1	28	11548022	11572245	-1		HPS1	Hermansky-Pudlak syndrome 1	HPS1, biogenesis of lysosomal organelles complex 3 subunit 1 [Source:HGNC Symbol;Acc:HGNC:5163]	PCAdmix_DOG
	ENSCAFG00000009386	HPSE2	HPSE2	28	11585807	11835104	-1				heparanase 2 (inactive) [Source:HGNC Symbol;Acc:HGNC:18374]	PCAdmix_DOG
	ENSCAFG00000031507			28	12145095	12216422	-1					PCAdmix_DOG
	ENSCAFG00000009428	CNNM1	CNNM1	28	12289827	12349036	1		CNNM1	cyclin and CBS domain divalent metal cation transport mediator 1	cyclin and CBS domain divalent metal cation transport mediator 1 [Source:HGNC Symbol;Acc:HGNC:102]	PCAdmix_DOG
	ENSCAFG00000009466	GOT1	GOT1	28	12351936	12377942	-1		GOT1	glutamic-oxaloacetic transaminase 1, soluble	aspartate aminotransferase, cytoplasmic [Source:RefSeq peptide;Acc:NP_001277045]	PCAdmix_DOG
	ENSCAFG00000009469	NKX2-3	NKX2-3	28	12466368	12469272	1				NK2 homeobox 3 [Source:HGNC Symbol;Acc:HGNC:7836]	PCAdmix_DOG
	ENSCAFG00000025373		SLC25A28	28	12533276	12543312	-1		SLC25A28	solute carrier family 25 (mitochondrial iron transporter), member 28		PCAdmix_DOG
	ENSCAFG00000009487	ENTPD7	ENTPD7	28	12565534	12600240	1		ENTPD7	ectonucleoside triphosphate diphosphohydrolase 7	ectonucleoside triphosphate diphosphohydrolase 7 [Source:HGNC Symbol;Acc:HGNC:19745]	PCAdmix_DOG
	ENSCAFG00000009515	COX15	COX15	28	12610498	12624966	-1		LOC477792	cytochrome c oxidase assembly protein COX15 homolog	COX15 cytochrome c oxidase assembly homolog [Source:HGNC Symbol;Acc:HGNC:2263]	PCAdmix_DOG
	ENSCAFG00000009524	CUTC	CUTC	28	12624390	12650904	1		CUTC	cutC copper transporter	cutC copper transporter [Source:HGNC Symbol;Acc:HGNC:24271]	PCAdmix_DOG
	ENSCAFG00000009536	ABCC2	ABCC2	28	12670758	12744307	1		ABCC2	ATP-binding cassette, sub-family C (CFTR/MRP), member 2	canalicular multispecific organic anion transporter 1 [Source:RefSeq peptide;Acc:NP_001003081]	PCAdmix_DOG
	ENSCAFG00000009561	DNMBP	DNMBP	28	12751810	12825494	-1		DNMBP	dynamin binding protein	dynamin binding protein [Source:HGNC Symbol;Acc:HGNC:30373]	PCAdmix_DOG
	ENSCAFG00000009571	CPN1	CPN1	28	12875221	12909846	-1		CPN1	carboxypeptidase N, polypeptide 1	carboxypeptidase N subunit 1 [Source:HGNC Symbol;Acc:HGNC:2312]	PCAdmix_DOG
	ENSCAFG00000009576	ERLIN1	ERLIN1	28	12927018	12961566	-1		ERLIN1	ER lipid raft associated 1	ER lipid raft associated 1 [Source:HGNC Symbol;Acc:HGNC:16947]	PCAdmix_DOG
	ENSCAFG00000009588	CHUK	CHUK	28	12965873	13001552	-1		CHUK	conserved helix-loop-helix ubiquitous kinase	conserved helix-loop-helix ubiquitous kinase [Source:HGNC Symbol;Acc:HGNC:1974]	PCAdmix_DOG
	ENSCAFG00000009624	CWF19L1	CWF19L1	28	13003752	13033416	-1		CWF19L1	CWF19-like 1, cell cycle control (S. pombe)	CWF19-like 1, cell cycle control (S. pombe) [Source:HGNC Symbol;Acc:HGNC:25613]	PCAdmix_DOG
	ENSCAFG00000029534	BLOC1S2	BLOC1S2	28	13037267	13044866	-1		BLOC1S2	biogenesis of lysosomal organelles complex-1, subunit 2	biogenesis of lysosomal organelles complex 1 subunit 2 [Source:HGNC Symbol;Acc:HGNC:20984]	PCAdmix_DOG
	ENSCAFG00000009644	PKD2L1	PKD2L1	28	13046003	13076332	-1		PKD2L1	polycystic kidney disease 2-like 1	polycystin 2 like 1, transient receptor potential cation channel [Source:HGNC Symbol;Acc:HGNC:9011]	PCAdmix_DOG
	ENSCAFG00000009663	SCD	SCD	28	13112455	13129198	1		SCD	stearoyl-CoA desaturase (delta-9-desaturase)	stearoyl-CoA desaturase [Source:HGNC Symbol;Acc:HGNC:10571]	PCAdmix_DOG
	ENSCAFG00000009672	WNT8B	WNT8B	28	13188142	13210392	1		WNT8B	wingless-type MMTV integration site family, member 8B	Wnt family member 8B [Source:HGNC Symbol;Acc:HGNC:12789]	PCAdmix_DOG
	ENSCAFG00000009685	SEC31B	SEC31B	28	13213863	13246172	-1		SEC31B	SEC31 homolog B, COPII coat complex component	SEC31 homolog B, COPII coat complex component [Source:HGNC Symbol;Acc:HGNC:23197]	PCAdmix_DOG
	ENSCAFG00000009707	HIF1AN	HIF1AN	28	13258795	13267262	1		HIF1AN	hypoxia inducible factor 1, alpha subunit inhibitor	hypoxia inducible factor 1 alpha subunit inhibitor [Source:HGNC Symbol;Acc:HGNC:17113]	PCAdmix_DOG
	ENSCAFG00000009709	PAX2	PAX2	28	13442891	13519915	1		PAX2	paired box 2	paired box 2 [Source:HGNC Symbol;Acc:HGNC:8616]	PCAdmix_DOG
	ENSCAFG00000009930	MGEA5	MGEA5	28	14378854	14404541	-1		MGEA5	meningioma expressed antigen 5 (hyaluronidase)	meningioma expressed antigen 5 (hyaluronidase) [Source:HGNC Symbol;Acc:HGNC:7056]	PCAdmix_DOG
	ENSCAFG00000009952	KCNIP2	KCNIP2	28	14409526	14425641	-1		KCNIP2	Kv channel interacting protein 2	Kv channel-interacting protein 2 [Source:RefSeq peptide;Acc:NP_001184119]	PCAdmix_DOG
	ENSCAFG00000009971	C10orf76	C10orf76	28	14428988	14593985	-1		C28H10orf76	chromosome 28 open reading frame, human C10orf76	chromosome 10 open reading frame 76 [Source:HGNC Symbol;Acc:HGNC:25788]	PCAdmix_DOG
	ENSCAFG00000009990	HPS6	HPS6	28	14614584	14616962	1		HPS6	Hermansky-Pudlak syndrome 6	HPS6, biogenesis of lysosomal organelles complex 2 subunit 3 [Source:HGNC Symbol;Acc:HGNC:18817]	PCAdmix_DOG
	ENSCAFG00000010005	LDB1	LDB1	28	14646944	14658490	-1				LIM domain binding 1 [Source:HGNC Symbol;Acc:HGNC:6532]	PCAdmix_DOG
	ENSCAFG00000010040	PPRC1	PPRC1	28	14669139	14684261	1		PPRC1	peroxisome proliferator-activated receptor gamma, coactivator-related 1	peroxisome proliferator-activated receptor gamma, coactivator-related 1 [Source:HGNC Symbol;Acc:HGNC:30025]	PCAdmix_DOG
	ENSCAFG00000028623	ELOVL3	ELOVL3	28	14756251	14763174	1		ELOVL3	ELOVL fatty acid elongase 3	ELOVL fatty acid elongase 3 [Source:HGNC Symbol;Acc:HGNC:18047]	PCAdmix_DOG
	ENSCAFG00000031758	PITX3	PITX3	28	14758640	14762716	-1		PITX3	paired-like homeodomain 3	paired like homeodomain 3 [Source:HGNC Symbol;Acc:HGNC:9006]	PCAdmix_DOG
	ENSCAFG00000010131	GBF1	GBF1	28	14788369	14895551	1		GBF1	golgi brefeldin A resistant guanine nucleotide exchange factor 1	golgi brefeldin A resistant guanine nucleotide exchange factor 1 [Source:HGNC Symbol;Acc:HGNC:4181]	PCAdmix_DOG
	ENSCAFG00000010155	NFKB2	NFKB2	28	14901843	14910276	1		NFKB2	nuclear factor of kappa light polypeptide gene enhancer in B-cells 2 (p49/p100)	nuclear factor kappa B subunit 2 [Source:HGNC Symbol;Acc:HGNC:7795]	PCAdmix_DOG
	ENSCAFG00000010170	PSD	PSD	28	14911104	14924122	-1		PSD	pleckstrin and Sec7 domain containing	pleckstrin and Sec7 domain containing [Source:HGNC Symbol;Acc:HGNC:9507]	PCAdmix_DOG
	ENSCAFG00000010176	FBXL15	FBXL15	28	14927812	14929722	1		FBXL15	F-box and leucine-rich repeat protein 15	F-box/LRR-repeat protein 15 [Source:UniProtKB/Swiss-Prot;Acc:E2RKN7]	PCAdmix_DOG
	ENSCAFG00000010189	CUEDC2	CUEDC2	28	14930172	14931943	-1		CUEDC2	CUE domain containing 2	CUE domain containing 2 [Source:HGNC Symbol;Acc:HGNC:28352]	PCAdmix_DOG
	ENSCAFG00000010201	MFSD13A	MFSD13A	28	14957189	14970416	1		TMEM180	transmembrane protein 180	major facilitator superfamily domain containing 13A [Source:HGNC Symbol;Acc:HGNC:26196]	PCAdmix_DOG
	ENSCAFG00000010210	ACTR1A	ACTR1A	28	14972509	14990434	-1		ACTR1A	ARP1 actin-related protein 1 homolog A, centractin alpha (yeast)	Alpha-centractin [Source:UniProtKB/Swiss-Prot;Acc:P61162]	PCAdmix_DOG
	ENSCAFG00000010221	SUFU	SUFU	28	14993158	15112386	1		SUFU	suppressor of fused homolog (Drosophila)	SUFU negative regulator of hedgehog signaling [Source:HGNC Symbol;Acc:HGNC:16466]	PCAdmix_DOG
	ENSCAFG00000010232	TRIM8	TRIM8	28	15124042	15137850	1		TRIM8	tripartite motif containing 8	tripartite motif containing 8 [Source:HGNC Symbol;Acc:HGNC:15579]	PCAdmix_DOG
	ENSCAFG00000010243	ARL3	ARL3	28	15142488	15188803	-1		ARL3	ADP-ribosylation factor-like 3	ADP ribosylation factor like GTPase 3 [Source:HGNC Symbol;Acc:HGNC:694]	PCAdmix_DOG
	ENSCAFG00000010254	SFXN2	SFXN2	28	15202310	15214440	1		SFXN2	sideroflexin 2	sideroflexin 2 [Source:HGNC Symbol;Acc:HGNC:16086]	PCAdmix_DOG
	ENSCAFG00000010264	WBP1L	WBP1L	28	15218836	15282193	1		WBP1L	WW domain binding protein 1-like	WW domain binding protein 1-like [Source:HGNC Symbol;Acc:HGNC:23510]	PCAdmix_DOG
	ENSCAFG00000010279	CYP17A1	CYP17A1	28	15292522	15299029	-1		CYP17A1	cytochrome P450, family 17, subfamily A, polypeptide 1	cytochrome P450 family 17 subfamily A member 1 [Source:HGNC Symbol;Acc:HGNC:2593]	PCAdmix_DOG
	ENSCAFG00000029785		BORCS7	28	15313775	15325300	1		BORCS7	BLOC-1 related complex subunit 7		PCAdmix_DOG
	ENSCAFG00000010310	CNNM2	CNNM2	28	15333364	15514886	1		AS3MT	arsenite methyltransferase	cyclin and CBS domain divalent metal cation transport mediator 2 [Source:HGNC Symbol;Acc:HGNC:103]	PCAdmix_DOG
	ENSCAFG00000010354	NT5C2	NT5C2	28	15526793	15605051	-1		NT5C2	5'-nucleotidase, cytosolic II	5'-nucleotidase, cytosolic II [Source:HGNC Symbol;Acc:HGNC:8022]	PCAdmix_DOG
	ENSCAFG00000030051			28	15623367	15623830	1					PCAdmix_DOG
	ENSCAFG00000010367	INA	INA	28	15670812	15685185	1		INA	internexin neuronal intermediate filament protein, alpha	internexin neuronal intermediate filament protein alpha [Source:HGNC Symbol;Acc:HGNC:6057]	PCAdmix_DOG
	ENSCAFG00000010380	PCGF6	PCGF6	28	15682955	15733709	-1		PCGF6	polycomb group ring finger 6	polycomb group ring finger 6 [Source:HGNC Symbol;Acc:HGNC:21156]	PCAdmix_DOG
	ENSCAFG00000010393	TAF5	TAF5	28	15747120	15760901	1		TAF5	TAF5 RNA polymerase II, TATA box binding protein (TBP)-associated factor, 100kDa	TATA-box binding protein associated factor 5 [Source:HGNC Symbol;Acc:HGNC:11539]	PCAdmix_DOG
	ENSCAFG00000010411	PDCD11	PDCD11	28	15769845	15812112	1		PDCD11	programmed cell death 11	programmed cell death 11 [Source:HGNC Symbol;Acc:HGNC:13408]	PCAdmix_DOG
	ENSCAFG00000010451	CALHM2	CALHM2	28	15814429	15816566	-1		CALHM2	calcium homeostasis modulator 2	calcium homeostasis modulator 2 [Source:HGNC Symbol;Acc:HGNC:23493]	PCAdmix_DOG
	ENSCAFG00000010454	CALHM1	CALHM1	28	15821038	15825454	-1		CALHM1	calcium homeostasis modulator 1	calcium homeostasis modulator 1 [Source:HGNC Symbol;Acc:HGNC:23494]	PCAdmix_DOG
	ENSCAFG00000010455	CALHM3	CALHM3	28	15834404	15842455	-1		CALHM3	calcium homeostasis modulator 3	calcium homeostasis modulator 3 [Source:HGNC Symbol;Acc:HGNC:23458]	PCAdmix_DOG
	ENSCAFG00000010460	NEURL1	NEURL1	28	15856616	15935938	1		NEURL1	neuralized E3 ubiquitin protein ligase 1	neuralized E3 ubiquitin protein ligase 1 [Source:HGNC Symbol;Acc:HGNC:7761]	PCAdmix_DOG
	ENSCAFG00000010473	SH3PXD2A	SH3PXD2A	28	15944503	16165838	-1		SH3PXD2A	SH3 and PX domains 2A	SH3 and PX domains 2A [Source:HGNC Symbol;Acc:HGNC:23664]	PCAdmix_DOG
	ENSCAFG00000010483	OBFC1	OBFC1	28	16204241	16246858	-1		OBFC1	oligonucleotide/oligosaccharide-binding fold containing 1	oligonucleotide/oligosaccharide binding fold containing 1 [Source:HGNC Symbol;Acc:HGNC:26200]	PCAdmix_DOG
	ENSCAFG00000010495			28	16266415	16267206	1					PCAdmix_DOG
	ENSCAFG00000010516	SLK	SLK	28	16286638	16344227	1		SLK	STE20-like kinase	STE20 like kinase [Source:HGNC Symbol;Acc:HGNC:11088]	PCAdmix_DOG
	ENSCAFG00000010547	COL17A1	COL17A1	28	16350689	16402211	-1		COL17A1	collagen, type XVII, alpha 1	Collagen alpha-1(XVII) chain 120 kDa linear IgA disease antigen homolog [Source:UniProtKB/Swiss-Prot;Acc:Q9N281]	PCAdmix_DOG
	ENSCAFG00000031542	SFR1	SFR1	28	16436216	16444149	1		SFR1	SWI5-dependent homologous recombination repair protein 1	SWI5 dependent homologous recombination repair protein 1 [Source:HGNC Symbol;Acc:HGNC:29574]	PCAdmix_DOG
	ENSCAFG00000010560	CFAP43	CFAP43	28	16439156	16555048	-1		CFAP43	cilia and flagella associated protein 43	cilia and flagella associated protein 43 [Source:HGNC Symbol;Acc:HGNC:26684]	PCAdmix_DOG
	ENSCAFG00000024905	GSTO2	GSTO2	28	16589784	16591387	1				glutathione S-transferase omega 2 [Source:HGNC Symbol;Acc:HGNC:23064]	PCAdmix_DOG
	ENSCAFG00000010604	ITPRIP	ITPRIP	28	16616092	16638104	-1				inositol 1,4,5-trisphosphate receptor interacting protein [Source:HGNC Symbol;Acc:HGNC:29370]	PCAdmix_DOG
	ENSCAFG00000010608	CFAP58	CFAP58	28	16653076	16755782	1		CFAP58	cilia and flagella associated protein 58	cilia and flagella associated protein 58 [Source:HGNC Symbol;Acc:HGNC:26676]	PCAdmix_DOG
	ENSCAFG00000010623	SORCS3	SORCS3	28	16909796	17491098	1		SORCS3	sortilin-related VPS10 domain containing receptor 3	sortilin related VPS10 domain containing receptor 3 [Source:HGNC Symbol;Acc:HGNC:16699]	PCAdmix_DOG
	ENSCAFG00000024653		LOC100687619	28	17935492	17935944	1		LOC100687619	peptidyl-prolyl cis-trans isomerase NIMA-interacting 4		PCAdmix_DOG
	ENSCAFG00000010628	SORCS1	SORCS1	28	18619017	18933066	-1				sortilin related VPS10 domain containing receptor 1 [Source:HGNC Symbol;Acc:HGNC:16697]	PCAdmix_DOG
	ENSCAFG00000011991	RAB11FIP2	RAB11FIP2	28	28414674	28457281	-1		RAB11FIP2	RAB11 family interacting protein 2 (class I)	RAB11 family interacting protein 2 [Source:HGNC Symbol;Acc:HGNC:29152]	PCAdmix_DOG
	ENSCAFG00000011999	FAM204A	FAM204A	28	28697517	28730694	-1		FAM204A	family with sequence similarity 204, member A	family with sequence similarity 204 member A [Source:HGNC Symbol;Acc:HGNC:25794]	PCAdmix_DOG
	ENSCAFG00000012005	PRLHR	PRLHR	28	28954469	28955581	-1		PRLHR	prolactin releasing hormone receptor	prolactin releasing hormone receptor [Source:HGNC Symbol;Acc:HGNC:4464]	PCAdmix_DOG
	ENSCAFG00000012009	CACUL1	CACUL1	28	29016707	29092887	-1		CACUL1	CDK2-associated, cullin domain 1	CDK2 associated cullin domain 1 [Source:HGNC Symbol;Acc:HGNC:23727]	PCAdmix_DOG
	ENSCAFG00000025549			28	29285996	29286373	1					PCAdmix_DOG
	ENSCAFG00000012057	EIF3A	EIF3A	28	29290607	29326701	-1		EIF3A	eukaryotic translation initiation factor 3, subunit A	eukaryotic translation initiation factor 3 subunit A [Source:HGNC Symbol;Acc:HGNC:3271]	PCAdmix_DOG
	ENSCAFG00000012090	FAM45A	FAM45A	28	29326525	29367881	1		FAM45A	family with sequence similarity 45, member A	family with sequence similarity 45 member A [Source:HGNC Symbol;Acc:HGNC:31793]	PCAdmix_DOG
	ENSCAFG00000012102	SFXN4	SFXN4	28	29371704	29393642	-1				sideroflexin 4 [Source:HGNC Symbol;Acc:HGNC:16088]	PCAdmix_DOG
	ENSCAFG00000012109	PRDX3	PRDX3	28	29396333	29403719	-1		PRDX3	peroxiredoxin 3		PCAdmix_DOG
	ENSCAFG00000012129	GRK5	GRK5	28	29424593	29636609	1		GRK5	G protein-coupled receptor kinase 5	G protein-coupled receptor kinase 5 [Source:HGNC Symbol;Acc:HGNC:4544]	PCAdmix_DOG
	ENSCAFG00000031204	RGS10	RGS10	28	29671467	29707209	-1		RGS10	regulator of G-protein signaling 10	regulator of G-protein signaling 10 [Source:HGNC Symbol;Acc:HGNC:9992]	PCAdmix_DOG
	ENSCAFG00000012171	TIAL1	TIAL1	28	29732125	29750071	-1		TIAL1	TIA1 cytotoxic granule-associated RNA binding protein-like 1	TIA1 cytotoxic granule-associated RNA binding protein-like 1 [Source:HGNC Symbol;Acc:HGNC:11804]	PCAdmix_DOG
	ENSCAFG00000012199	BAG3	BAG3	28	29792503	29815693	1		BAG3	BCL2-associated athanogene 3	BCL2 associated athanogene 3 [Source:HGNC Symbol;Acc:HGNC:939]	PCAdmix_DOG
	ENSCAFG00000012205	INPP5F	INPP5F	28	29877810	29944490	1		INPP5F	inositol polyphosphate-5-phosphatase F	inositol polyphosphate-5-phosphatase F [Source:HGNC Symbol;Acc:HGNC:17054]	PCAdmix_DOG
	ENSCAFG00000012225			28	29947998	29978585	-1				minichromosome maintenance complex binding protein [Source:RefSeq peptide;Acc:NP_001257780]	PCAdmix_DOG
	ENSCAFG00000012270	SEC23IP	SEC23IP	28	30007703	30046528	1		SEC23IP	SEC23 interacting protein	SEC23 interacting protein [Source:HGNC Symbol;Acc:HGNC:17018]	PCAdmix_DOG
	ENSCAFG00000012316		CCDC25	28	30030898	30031524	-1		CCDC25	coiled-coil domain containing 25		PCAdmix_DOG
	ENSCAFG00000012318	PLPP4	PLPP4	28	30494737	30585354	1				phospholipid phosphatase 4 [Source:HGNC Symbol;Acc:HGNC:23531]	PCAdmix_DOG
	ENSCAFG00000012327	WDR11	WDR11	28	30769161	30830645	1		WDR11	WD repeat domain 11	WD repeat domain 11 [Source:HGNC Symbol;Acc:HGNC:13831]	PCAdmix_DOG
	ENSCAFG00000012374	FGFR2	FGFR2	28	31303479	31411575	-1		FGFR2	fibroblast growth factor receptor 2	fibroblast growth factor receptor 2 [Source:HGNC Symbol;Acc:HGNC:3689]	PCAdmix_DOG
	ENSCAFG00000012400	ATE1	ATE1	28	31526643	31690571	-1		ATE1	arginyltransferase 1	arginyltransferase 1 [Source:HGNC Symbol;Acc:HGNC:782]	PCAdmix_DOG
	ENSCAFG00000030131			28	31690882	31691523	-1					PCAdmix_DOG
	ENSCAFG00000012412			28	31705746	31706453	1					PCAdmix_DOG
	ENSCAFG00000012419	NSMCE4A	NSMCE4A	28	31711771	31723103	-1				NSE4 homolog A, SMC5-SMC6 complex component [Source:HGNC Symbol;Acc:HGNC:25935]	PCAdmix_DOG
	ENSCAFG00000012494	TACC2	TACC2	28	31735075	31943242	1		TACC2	transforming, acidic coiled-coil containing protein 2	transforming acidic coiled-coil containing protein 2 [Source:HGNC Symbol;Acc:HGNC:11523]	PCAdmix_DOG
	ENSCAFG00000012534	BTBD16	BTBD16	28	31953944	31994613	1		BTBD16	BTB (POZ) domain containing 16	BTB domain containing 16 [Source:HGNC Symbol;Acc:HGNC:26340]	PCAdmix_DOG
	ENSCAFG00000012547	PLEKHA1	PLEKHA1	28	32025449	32082071	1		PLEKHA1	pleckstrin homology domain containing, family A (phosphoinositide binding specific) member 1	pleckstrin homology domain containing A1 [Source:HGNC Symbol;Acc:HGNC:14335]	PCAdmix_DOG
	ENSCAFG00000012556	HTRA1	HTRA1	28	32131715	32160392	1				HtrA serine peptidase 1 [Source:HGNC Symbol;Acc:HGNC:9476]	PCAdmix_DOG
	ENSCAFG00000012561	DMBT1	DMBT1	28	32197970	32286584	1		DMBT1	deleted in malignant brain tumors 1	deleted in malignant brain tumors 1 [Source:HGNC Symbol;Acc:HGNC:2926]	PCAdmix_DOG
	ENSCAFG00000012597	C10orf120	C10orf120	28	32319399	32321107	-1		C28H10orf120	chromosome 28 open reading frame, human C10orf120	chromosome 10 open reading frame 120 [Source:HGNC Symbol;Acc:HGNC:25707]	PCAdmix_DOG
	ENSCAFG00000024245			28	32372889	32448439	1					PCAdmix_DOG
	ENSCAFG00000012609	CUZD1	CUZD1	28	32452752	32465175	-1		CUZD1	CUB and zona pellucida-like domains 1	CUB and zona pellucida like domains 1 [Source:HGNC Symbol;Acc:HGNC:17937]	PCAdmix_DOG
	ENSCAFG00000030015		FAM24B	28	32469255	32471578	-1		FAM24B	family with sequence similarity 24, member B		PCAdmix_DOG
	ENSCAFG00000012627			28	32479841	32496531	1					PCAdmix_DOG
	ENSCAFG00000012637			28	32510318	32527475	-1					PCAdmix_DOG
	ENSCAFG00000012641	PSTK	PSTK	28	32535161	32550635	1		PSTK	phosphoseryl-tRNA kinase	phosphoseryl-tRNA kinase [Source:HGNC Symbol;Acc:HGNC:28578]	PCAdmix_DOG
	ENSCAFG00000030765	IKZF5	IKZF5	28	32545824	32562804	-1		IKZF5	IKAROS family zinc finger 5 (Pegasus)	IKAROS family zinc finger 5 [Source:HGNC Symbol;Acc:HGNC:14283]	PCAdmix_DOG
	ENSCAFG00000012698	HMX3	HMX3	28	32563931	32675232	1				H6 family homeobox 3 [Source:HGNC Symbol;Acc:HGNC:5019]	PCAdmix_DOG
	ENSCAFG00000012674	ACADSB	ACADSB	28	32564558	32600600	1		ACADSB	acyl-CoA dehydrogenase, short/branched chain	acyl-CoA dehydrogenase, short/branched chain [Source:HGNC Symbol;Acc:HGNC:91]	PCAdmix_DOG
	ENSCAFG00000012699	HMX2	HMX2	28	32679561	32687981	1		HMX2	H6 family homeobox 2	H6 family homeobox 2 [Source:HGNC Symbol;Acc:HGNC:5018]	PCAdmix_DOG
	ENSCAFG00000012700	BUB3	BUB3	28	32692690	32704961	1		BUB3	BUB3 mitotic checkpoint protein	BUB3, mitotic checkpoint protein [Source:HGNC Symbol;Acc:HGNC:1151]	PCAdmix_DOG
	ENSCAFG00000012714	GPR26	GPR26	28	33151891	33174198	1		GPR26	G protein-coupled receptor 26	G protein-coupled receptor 26 [Source:HGNC Symbol;Acc:HGNC:4481]	PCAdmix_DOG
	ENSCAFG00000012718	CPXM2	CPXM2	28	33219347	33687820	-1		CPXM2	carboxypeptidase X (M14 family), member 2	carboxypeptidase X (M14 family), member 2 [Source:HGNC Symbol;Acc:HGNC:26977]	PCAdmix_DOG
	ENSCAFG00000012723	CHST15	CHST15	28	33425243	33460911	-1		CHST15	carbohydrate (N-acetylgalactosamine 4-sulfate 6-O) sulfotransferase 15	carbohydrate sulfotransferase 15 [Source:HGNC Symbol;Acc:HGNC:18137]	PCAdmix_DOG
	ENSCAFG00000012743	OAT	OAT	28	33763600	33788282	-1		OAT	ornithine aminotransferase	ornithine aminotransferase [Source:HGNC Symbol;Acc:HGNC:8091]	PCAdmix_DOG
	ENSCAFG00000031292	NKX1-2	NKX1-2	28	33806215	33811331	-1		NKX1-2	NK1 homeobox 2	NK1 homeobox 2 [Source:HGNC Symbol;Acc:HGNC:31652]	PCAdmix_DOG
	ENSCAFG00000012748	LHPP	LHPP	28	33828088	33955505	1		LHPP	phospholysine phosphohistidine inorganic pyrophosphate phosphatase	phospholysine phosphohistidine inorganic pyrophosphate phosphatase [Source:HGNC Symbol;Acc:HGNC:30042]	PCAdmix_DOG
	ENSCAFG00000012752	FAM53B	FAM53B	28	33958188	34027647	-1		FAM53B	family with sequence similarity 53, member B	family with sequence similarity 53 member B [Source:HGNC Symbol;Acc:HGNC:28968]	PCAdmix_DOG
	ENSCAFG00000012755			28	34077038	34099901	-1					PCAdmix_DOG
	ENSCAFG00000012760	FAM175B	FAM175B	28	34106963	34134333	1		FAM175B	family with sequence similarity 175, member B	family with sequence similarity 175 member B [Source:HGNC Symbol;Acc:HGNC:28975]	PCAdmix_DOG
	ENSCAFG00000012768	ZRANB1	ZRANB1	28	34220596	34256585	1		ZRANB1	zinc finger, RAN-binding domain containing 1	zinc finger RANBP2-type containing 1 [Source:HGNC Symbol;Acc:HGNC:18224]	PCAdmix_DOG
	ENSCAFG00000012775		CTBP2	28	34261158	34415733	-1		CTBP2	C-terminal binding protein 2		PCAdmix_DOG
	ENSCAFG00000032418			28	34712054	34713394	1					PCAdmix_DOG
	ENSCAFG00000032753	TEX36	TEX36	28	34834410	34856932	-1		TEX36	testis expressed 36	testis expressed 36 [Source:HGNC Symbol;Acc:HGNC:31653]	PCAdmix_DOG
	ENSCAFG00000012820	EDRF1	EDRF1	28	34891056	34935222	1		EDRF1	erythroid differentiation regulatory factor 1	erythroid differentiation regulatory factor 1 [Source:HGNC Symbol;Acc:HGNC:24640]	PCAdmix_DOG
	ENSCAFG00000012857	MMP21	MMP21	28	34936976	34944110	-1		MMP21	matrix metallopeptidase 21	matrix metallopeptidase 21 [Source:HGNC Symbol;Acc:HGNC:14357]	PCAdmix_DOG
	ENSCAFG00000012866	UROS	UROS	28	34950591	34983571	-1		UROS	uroporphyrinogen III synthase	uroporphyrinogen III synthase [Source:HGNC Symbol;Acc:HGNC:12592]	PCAdmix_DOG
	ENSCAFG00000012873	BCCIP	BCCIP	28	34983650	34998963	1		BCCIP	BRCA2 and CDKN1A interacting protein	BRCA2 and CDKN1A interacting protein [Source:HGNC Symbol;Acc:HGNC:978]	PCAdmix_DOG
	ENSCAFG00000012912	DHX32	DHX32	28	34999390	35035964	-1		DHX32	DEAH (Asp-Glu-Ala-His) box polypeptide 32	DEAH-box helicase 32 (putative) [Source:HGNC Symbol;Acc:HGNC:16717]	PCAdmix_DOG
	ENSCAFG00000012954	FANK1	FANK1	28	35073023	35153424	1		FANK1	fibronectin type III and ankyrin repeat domains 1	fibronectin type III and ankyrin repeat domains 1 [Source:HGNC Symbol;Acc:HGNC:23527]	PCAdmix_DOG
	ENSCAFG00000012986	ADAM12	ADAM12	28	35159834	35485173	-1		ADAM12	ADAM metallopeptidase domain 12	ADAM metallopeptidase domain 12 [Source:HGNC Symbol;Acc:HGNC:190]	PCAdmix_DOG
	ENSCAFG00000013001	C10orf90	C10orf90	28	35514096	35698789	-1		C28H10orf90	chromosome 28 open reading frame, human C10orf90	chromosome 10 open reading frame 90 [Source:HGNC Symbol;Acc:HGNC:26563]	PCAdmix_DOG
	ENSCAFG00000013062	DOCK1	DOCK1	28	35868875	36396600	1		DOCK1	dedicator of cytokinesis 1	dedicator of cytokinesis 1 [Source:HGNC Symbol;Acc:HGNC:2987]	PCAdmix_DOG
	ENSCAFG00000013123	FAM196A	FAM196A	28	36104110	36160113	-1		FAM196A	family with sequence similarity 196, member A	family with sequence similarity 196 member A [Source:HGNC Symbol;Acc:HGNC:33859]	PCAdmix_DOG
	ENSCAFG00000031629	NPS	NPS	28	36488510	36492112	1				neuropeptide S [Source:HGNC Symbol;Acc:HGNC:33940]	PCAdmix_DOG
	ENSCAFG00000013126	FOXI2	FOXI2	28	36636575	36638597	1		FOXI2	forkhead box I2	forkhead box I2 [Source:HGNC Symbol;Acc:HGNC:32448]	PCAdmix_DOG
	ENSCAFG00000013127	CLRN3	CLRN3	28	36721645	36734576	-1		CLRN3	clarin 3	clarin 3 [Source:HGNC Symbol;Acc:HGNC:20795]	PCAdmix_DOG
	ENSCAFG00000013204	PTPRE	PTPRE	28	36746822	36902083	1		PTPRE	protein tyrosine phosphatase, receptor type, E	protein tyrosine phosphatase, receptor type E [Source:HGNC Symbol;Acc:HGNC:9669]	PCAdmix_DOG
	ENSCAFG00000013255	MKI67	MKI67	28	36915568	36939437	-1				marker of proliferation Ki-67 [Source:HGNC Symbol;Acc:HGNC:7107]	PCAdmix_DOG
	ENSCAFG00000010878	TCERG1L	TCERG1L	28	39421832	39599692	-1				transcription elongation regulator 1 like [Source:HGNC Symbol;Acc:HGNC:23533]	PCAdmix_DOG
	ENSCAFG00000031153			28	40055983	40749441	1					PCAdmix_DOG
	ENSCAFG00000011123	LRRC27	LRRC27	28	40278360	40314543	1		LRRC27	leucine rich repeat containing 27	leucine rich repeat containing 27 [Source:HGNC Symbol;Acc:HGNC:29346]	PCAdmix_DOG
	ENSCAFG00000015875	WDR72	WDR72	30	19122912	19340771	-1		WDR72	WD repeat domain 72	WD repeat domain 72 [Source:HGNC Symbol;Acc:HGNC:26790]	PCAdmix_DOG
	ENSCAFG00000015890	UNC13C	UNC13C	30	19555202	20096713	1		UNC13C	unc-13 homolog C (C. elegans)	unc-13 homolog C (C. elegans) [Source:HGNC Symbol;Acc:HGNC:23149]	PCAdmix_DOG
	ENSCAFG00000009792	DSCR3	DSCR3	31	32380247	32427646	-1		DSCR3	Down syndrome critical region 3	DSCR3 arrestin fold containing [Source:HGNC Symbol;Acc:HGNC:3044]	PCAdmix_DOG
	ENSCAFG00000009801	DYRK1A	DYRK1A	31	32564987	32655943	1				dual specificity tyrosine phosphorylation regulated kinase 1A [Source:HGNC Symbol;Acc:HGNC:3091]	PCAdmix_DOG
	ENSCAFG00000004266			31	32641983	32642405	-1					PCAdmix_DOG
	ENSCAFG00000009812	KCNJ6	KCNJ6	31	32756204	33011045	-1		KCNJ6	potassium channel, inwardly rectifying subfamily J, member 6	potassium voltage-gated channel subfamily J member 6 [Source:HGNC Symbol;Acc:HGNC:6267]	PCAdmix_DOG
	ENSCAFG00000009817	KCNJ15	KCNJ15	31	33385755	33386885	1		KCNJ15	potassium channel, inwardly rectifying subfamily J, member 15	potassium voltage-gated channel subfamily J member 15 [Source:HGNC Symbol;Acc:HGNC:6261]	PCAdmix_DOG
	ENSCAFG00000009912	ERG	ERG	31	33458359	33632213	-1		ERG	v-ets avian erythroblastosis virus E26 oncogene homolog	ERG, ETS transcription factor [Source:HGNC Symbol;Acc:HGNC:3446]	PCAdmix_DOG
	ENSCAFG00000010037	BRWD1	BRWD1	31	34121818	34240553	-1		BRWD1	bromodomain and WD repeat domain containing 1	bromodomain and WD repeat domain containing 1 [Source:HGNC Symbol;Acc:HGNC:12760]	PCAdmix_DOG
	ENSCAFG00000010045	HMGN1	HMGN1	31	34276223	34282233	-1		HMGN1	high mobility group nucleosome binding domain 1	high mobility group nucleosome binding domain 1 [Source:HGNC Symbol;Acc:HGNC:4984]	PCAdmix_DOG
	ENSCAFG00000010048			31	34303832	34303948	1					PCAdmix_DOG
	ENSCAFG00000010067	IGSF5	IGSF5	31	34442719	34483013	1		IGSF5	immunoglobulin superfamily, member 5	immunoglobulin superfamily member 5 [Source:HGNC Symbol;Acc:HGNC:5952]	PCAdmix_DOG
	ENSCAFG00000029311	PCP4	PCP4	31	34529578	34584547	1		PCP4	Purkinje cell protein 4	Purkinje cell protein 4 [Source:HGNC Symbol;Acc:HGNC:8742]	PCAdmix_DOG
	ENSCAFG00000010139		DSCAM	31	34667286	34974317	-1		DSCAM	Down syndrome cell adhesion molecule		PCAdmix_DOG
	ENSCAFG00000010157	BACE2	BACE2	31	35714018	35760369	1		BACE2	beta-site APP-cleaving enzyme 2	beta-site APP-cleaving enzyme 2 [Source:HGNC Symbol;Acc:HGNC:934]	PCAdmix_DOG
	ENSCAFG00000010163	FAM3B	FAM3B	31	35806093	35844254	1		FAM3B	family with sequence similarity 3, member B	family with sequence similarity 3 member B [Source:HGNC Symbol;Acc:HGNC:1253]	PCAdmix_DOG
	ENSCAFG00000010167	MX2	MX2	31	35860596	35884282	1		MX2	MX dynamin-like GTPase 2	Interferon-induced GTP-binding protein Mx2 [Source:UniProtKB/Swiss-Prot;Acc:Q9N0Y2]	PCAdmix_DOG
	ENSCAFG00000010172	MX1	MX1	31	35905235	35929863	1		MX1	MX dynamin-like GTPase 1	Interferon-induced GTP-binding protein Mx1 Interferon-induced GTP-binding protein Mx1, N-terminally processed [Source:UniProtKB/Swiss-Prot;Acc:Q9N0Y3]	PCAdmix_DOG
	ENSCAFG00000010190	TMPRSS2	TMPRSS2	31	35933081	35959876	-1				transmembrane protease, serine 2 [Source:HGNC Symbol;Acc:HGNC:11876]	PCAdmix_DOG
	ENSCAFG00000010285	ABCG1	ABCG1	31	36553380	36620043	1		ABCG1	ATP-binding cassette, sub-family G (WHITE), member 1	ATP binding cassette subfamily G member 1 [Source:HGNC Symbol;Acc:HGNC:73]	PCAdmix_DOG
	ENSCAFG00000010348	TFF3	TFF3	31	36638762	36641696	-1		TFF3	trefoil factor 3 (intestinal)	Canis lupus familiaris trefoil factor 3 (intestinal) (TFF3), mRNA. [Source:RefSeq mRNA;Acc:NM_001002990]	PCAdmix_DOG
	ENSCAFG00000010349	TFF2	TFF2	31	36665533	36670941	-1				trefoil factor 2 [Source:HGNC Symbol;Acc:HGNC:11756]	PCAdmix_DOG
	ENSCAFG00000010351	TFF1	TFF1	31	36681313	36684660	-1		TFF1	trefoil factor 1	Trefoil factor 1 [Source:UniProtKB/Swiss-Prot;Acc:Q863T4]	PCAdmix_DOG
	ENSCAFG00000010372	TMPRSS3	TMPRSS3	31	36707723	36730198	-1				transmembrane protease, serine 3 [Source:HGNC Symbol;Acc:HGNC:11877]	PCAdmix_DOG
	ENSCAFG00000010403	UBASH3A	UBASH3A	31	36735771	36778002	1		UBASH3A	ubiquitin associated and SH3 domain containing A	ubiquitin-associated and SH3 domain-containing protein A [Source:RefSeq peptide;Acc:NP_001277050]	PCAdmix_DOG
	ENSCAFG00000010420	RSPH1	RSPH1	31	36792425	36810992	-1		RSPH1	radial spoke head 1 homolog (Chlamydomonas)	radial spoke head 1 homolog [Source:HGNC Symbol;Acc:HGNC:12371]	PCAdmix_DOG
	ENSCAFG00000010450	SLC37A1	SLC37A1	31	36828400	36890810	1		SLC37A1	solute carrier family 37 (glucose-6-phosphate transporter), member 1	solute carrier family 37 member 1 [Source:HGNC Symbol;Acc:HGNC:11024]	PCAdmix_DOG
	ENSCAFG00000010487	PDE9A	PDE9A	31	36949763	37036367	1		PDE9A	phosphodiesterase 9A	phosphodiesterase 9A [Source:HGNC Symbol;Acc:HGNC:8795]	PCAdmix_DOG
	ENSCAFG00000010500	WDR4	WDR4	31	37086033	37106742	-1		WDR4	WD repeat domain 4	WD repeat domain 4 [Source:HGNC Symbol;Acc:HGNC:12756]	PCAdmix_DOG
	ENSCAFG00000010508	NDUFV3	NDUFV3	31	37118167	37259324	1		NDUFV3	NADH dehydrogenase (ubiquinone) flavoprotein 3, 10kDa	NADH:ubiquinone oxidoreductase subunit V3 [Source:HGNC Symbol;Acc:HGNC:7719]	PCAdmix_DOG
	ENSCAFG00000010596		SIK1	31	37455075	37465807	-1		SIK1	salt-inducible kinase 1		PCAdmix_DOG
	ENSCAFG00000028913			31	37466459	37467670	-1					PCAdmix_DOG
	ENSCAFG00000010614	HSF2BP	HSF2BP	31	37544765	37643397	-1		HSF2BP	heat shock transcription factor 2 binding protein	heat shock transcription factor 2 binding protein [Source:HGNC Symbol;Acc:HGNC:5226]	PCAdmix_DOG
	ENSCAFG00000010621	RRP1B	RRP1B	31	37653072	37670941	1		RRP1B	ribosomal RNA processing 1B	ribosomal RNA processing 1B [Source:HGNC Symbol;Acc:HGNC:23818]	PCAdmix_DOG
	ENSCAFG00000031322	PDXK	PDXK	31	37692794	37712093	1		PDXK	pyridoxal (pyridoxine, vitamin B6) kinase	pyridoxal (pyridoxine, vitamin B6) kinase [Source:HGNC Symbol;Acc:HGNC:8819]	PCAdmix_DOG
	ENSCAFG00000010642	CSTB	CSTB	31	37718226	37718638	-1				cystatin B [Source:HGNC Symbol;Acc:HGNC:2482]	PCAdmix_DOG
	ENSCAFG00000010646	RRP1	RRP1	31	37732618	37747053	1		RRP1	ribosomal RNA processing 1	ribosomal RNA processing 1 [Source:HGNC Symbol;Acc:HGNC:18785]	PCAdmix_DOG
	ENSCAFG00000010654	AGPAT3	AGPAT3	31	37861817	37879665	1		AGPAT3	1-acylglycerol-3-phosphate O-acyltransferase 3	1-acylglycerol-3-phosphate O-acyltransferase 3 [Source:HGNC Symbol;Acc:HGNC:326]	PCAdmix_DOG
	ENSCAFG00000010669		TRAPPC10	31	37910612	37996508	1		TRAPPC10	trafficking protein particle complex 10		PCAdmix_DOG
	ENSCAFG00000010687		PWP2	31	38000196	38012503	1		PWP2	PWP2 periodic tryptophan protein homolog (yeast)		PCAdmix_DOG
	ENSCAFG00000010718		ICOSLG	31	38084816	38094819	-1		ICOSLG	inducible T-cell co-stimulator ligand		PCAdmix_DOG
	ENSCAFG00000010721		DNMT3L	31	38099403	38110907	-1		DNMT3L	DNA (cytosine-5-)-methyltransferase 3-like		PCAdmix_DOG
	ENSCAFG00000010724	AIRE	AIRE	31	38139662	38148978	1		AIRE	autoimmune regulator	autoimmune regulator [Source:HGNC Symbol;Acc:HGNC:360]	PCAdmix_DOG
	ENSCAFG00000010846	PFKL	PFKL	31	38156314	38178793	1		PFKL	phosphofructokinase, liver	phosphofructokinase, liver type [Source:HGNC Symbol;Acc:HGNC:8876]	PCAdmix_DOG
	ENSCAFG00000029916			31	38165060	38165965	-1					PCAdmix_DOG
	ENSCAFG00000030000			31	38166513	38192528	-1					PCAdmix_DOG
	ENSCAFG00000010988	C21orf2	C21orf2	31	38183128	38192942	-1				chromosome 21 open reading frame 2 [Source:HGNC Symbol;Acc:HGNC:1260]	PCAdmix_DOG
	ENSCAFG00000011077	ADARB1	ADARB1	31	38715545	38799894	1		ADARB1	adenosine deaminase, RNA-specific, B1	adenosine deaminase, RNA specific B1 [Source:HGNC Symbol;Acc:HGNC:226]	PCAdmix_DOG
	ENSCAFG00000029547			31	38875634	39454155	1					PCAdmix_DOG
	ENSCAFG00000011907	PCBP3	PCBP3	31	39219834	39275246	1		PCBP3	poly(rC) binding protein 3	poly(rC) binding protein 3 [Source:HGNC Symbol;Acc:HGNC:8651]	PCAdmix_DOG
	ENSCAFG00000012045	PCNT	PCNT	31	39578036	39776804	1		PCNT	pericentrin	pericentrin [Source:HGNC Symbol;Acc:HGNC:16068]	PCAdmix_DOG
	ENSCAFG00000012228	S100B	S100B	31	39784915	39786667	-1				S100 calcium binding protein B [Source:HGNC Symbol;Acc:HGNC:10500]	PCAdmix_DOG
	ENSCAFG00000010071	PDLIM5	PDLIM5	32	17294727	17505270	1		PDLIM5	PDZ and LIM domain 5	PDZ and LIM domain 5 [Source:HGNC Symbol;Acc:HGNC:17468]	PCAdmix_DOG
	ENSCAFG00000010107	BMPR1B	BMPR1B	32	17819265	17978113	1		BMPR1B	bone morphogenetic protein receptor, type IB	bone morphogenetic protein receptor type 1B [Source:HGNC Symbol;Acc:HGNC:1077]	PCAdmix_DOG
	ENSCAFG00000010215	UNC5C	UNC5C	32	17987785	18332959	-1		UNC5C	unc-5 netrin receptor C	unc-5 netrin receptor C [Source:HGNC Symbol;Acc:HGNC:12569]	PCAdmix_DOG
	ENSCAFG00000010244	STPG2	STPG2	32	19937903	20431021	-1		STPG2	sperm-tail PG-rich repeat containing 2	sperm tail PG-rich repeat containing 2 [Source:HGNC Symbol;Acc:HGNC:28712]	PCAdmix_DOG
	ENSCAFG00000010248			32	20350255	20352352	1					PCAdmix_DOG
	ENSCAFG00000010267	RAP1GDS1	RAP1GDS1	32	20565267	20688713	1		RAP1GDS1	RAP1, GTP-GDP dissociation stimulator 1	Rap1 GTPase-GDP dissociation stimulator 1 [Source:HGNC Symbol;Acc:HGNC:9859]	PCAdmix_DOG
	ENSCAFG00000010287	TSPAN5	TSPAN5	32	20707388	20877784	-1		TSPAN5	tetraspanin 5	tetraspanin 5 [Source:HGNC Symbol;Acc:HGNC:17753]	PCAdmix_DOG
	ENSCAFG00000010644	PPP3CA	PPP3CA	32	22688143	22997192	-1		PPP3CA	protein phosphatase 3, catalytic subunit, alpha isozyme	protein phosphatase 3 catalytic subunit alpha [Source:HGNC Symbol;Acc:HGNC:9314]	PCAdmix_DOG
	ENSCAFG00000010648			32	22975137	22976411	1					PCAdmix_DOG
	ENSCAFG00000010663			32	23142316	23142856	-1					PCAdmix_DOG
	ENSCAFG00000010666	RPS17	RPS17	32	23173462	23173848	1				ribosomal protein S17 [Source:HGNC Symbol;Acc:HGNC:10397]	PCAdmix_DOG
	ENSCAFG00000010676	BANK1	BANK1	32	23281315	23603279	1		BANK1	B-cell scaffold protein with ankyrin repeats 1	B-cell scaffold protein with ankyrin repeats 1 [Source:HGNC Symbol;Acc:HGNC:18233]	PCAdmix_DOG
	ENSCAFG00000010689	SLC39A8	SLC39A8	32	23724931	23800941	-1		SLC39A8	solute carrier family 39 (zinc transporter), member 8	solute carrier family 39 member 8 [Source:HGNC Symbol;Acc:HGNC:20862]	PCAdmix_DOG
	ENSCAFG00000010730	NFKB1	NFKB1	32	23948525	24042351	1		NFKB1	nuclear factor of kappa light polypeptide gene enhancer in B-cells 1	nuclear factor NF-kappa-B p105 subunit [Source:RefSeq peptide;Acc:NP_001003344]	PCAdmix_DOG
	ENSCAFG00000010769	MANBA	MANBA	32	24052094	24168027	-1		MANBA	mannosidase, beta A, lysosomal	mannosidase beta [Source:HGNC Symbol;Acc:HGNC:6831]	PCAdmix_DOG
	ENSCAFG00000010779	CISD2	CISD2	32	24258021	24273786	1		CISD2	CDGSH iron sulfur domain 2	CDGSH iron sulfur domain 2 [Source:HGNC Symbol;Acc:HGNC:24212]	PCAdmix_DOG
	ENSCAFG00000010801	SLC9B2	SLC9B2	32	24381289	24405528	-1				solute carrier family 9 member B2 [Source:HGNC Symbol;Acc:HGNC:25143]	PCAdmix_DOG
	ENSCAFG00000010813	BDH2	BDH2	32	24421453	24442449	-1		BDH2	3-hydroxybutyrate dehydrogenase, type 2	3-hydroxybutyrate dehydrogenase type 2 [Source:RefSeq peptide;Acc:NP_001300730]	PCAdmix_DOG
	ENSCAFG00000010836	CENPE	CENPE	32	24447340	24530431	-1		CENPE	centromere protein E, 312kDa	centromere protein E [Source:HGNC Symbol;Acc:HGNC:1856]	PCAdmix_DOG
	ENSCAFG00000010855	TACR3	TACR3	32	24810587	24888520	-1				neuromedin-K receptor [Source:RefSeq peptide;Acc:NP_001091010]	PCAdmix_DOG
	ENSCAFG00000031237		CXXC4	32	25469622	25492299	-1		CXXC4	CXXC finger protein 4		PCAdmix_DOG
	ENSCAFG00000010876	TET2	TET2	32	26021552	26144313	1		TET2	tet methylcytosine dioxygenase 2	tet methylcytosine dioxygenase 2 [Source:HGNC Symbol;Acc:HGNC:25941]	PCAdmix_DOG
	ENSCAFG00000010887	PPA2	PPA2	32	26250167	26314975	-1		PPA2	pyrophosphatase (inorganic) 2	pyrophosphatase (inorganic) 2 [Source:HGNC Symbol;Acc:HGNC:28883]	PCAdmix_DOG
	ENSCAFG00000010897	ARHGEF38	ARHGEF38	32	26383609	26530856	1		ARHGEF38	Rho guanine nucleotide exchange factor (GEF) 38	Rho guanine nucleotide exchange factor 38 [Source:HGNC Symbol;Acc:HGNC:25968]	PCAdmix_DOG
	ENSCAFG00000010906	INTS12	INTS12	32	26510660	26540732	-1		INTS12	integrator complex subunit 12	integrator complex subunit 12 [Source:HGNC Symbol;Acc:HGNC:25067]	PCAdmix_DOG
	ENSCAFG00000010916	GSTCD	GSTCD	32	26549915	26665700	1		GSTCD	glutathione S-transferase, C-terminal domain containing	glutathione S-transferase C-terminal domain containing [Source:HGNC Symbol;Acc:HGNC:25806]	PCAdmix_DOG
	ENSCAFG00000010936	NPNT	NPNT	32	26705524	26781840	1		NPNT	nephronectin	nephronectin [Source:HGNC Symbol;Acc:HGNC:27405]	PCAdmix_DOG
	ENSCAFG00000010959	TBCK	TBCK	32	26839595	27055609	-1		TBCK	TBC1 domain containing kinase	TBC1 domain containing kinase [Source:HGNC Symbol;Acc:HGNC:28261]	PCAdmix_DOG
	ENSCAFG00000011014		AIMP1	32	27062726	27105218	1		AIMP1	aminoacyl tRNA synthetase complex-interacting multifunctional protein 1		PCAdmix_DOG
	ENSCAFG00000030716	GIMD1	GIMD1	32	27112388	27123091	-1		GIMD1	GIMAP family P-loop NTPase domain containing 1	GIMAP family P-loop NTPase domain containing 1 [Source:HGNC Symbol;Acc:HGNC:44141]	PCAdmix_DOG
	ENSCAFG00000011087	DKK2	DKK2	32	27548647	27646935	-1		DKK2	dickkopf WNT signaling pathway inhibitor 2	dickkopf WNT signaling pathway inhibitor 2 [Source:HGNC Symbol;Acc:HGNC:2892]	PCAdmix_DOG
	ENSCAFG00000011167	PAPSS1	PAPSS1	32	28136473	28235444	-1		PAPSS1	3'-phosphoadenosine 5'-phosphosulfate synthase 1	3'-phosphoadenosine 5'-phosphosulfate synthase 1 [Source:HGNC Symbol;Acc:HGNC:8603]	PCAdmix_DOG
	ENSCAFG00000011200	SGMS2	SGMS2	32	28386397	28403338	1		SGMS2	sphingomyelin synthase 2	sphingomyelin synthase 2 [Source:HGNC Symbol;Acc:HGNC:28395]	PCAdmix_DOG
	ENSCAFG00000011203	CYP2U1	CYP2U1	32	28425473	28444361	1				cytochrome P450 family 2 subfamily U member 1 [Source:HGNC Symbol;Acc:HGNC:20582]	PCAdmix_DOG
	ENSCAFG00000011216	HADH	HADH	32	28459972	28506495	1				hydroxyacyl-CoA dehydrogenase [Source:HGNC Symbol;Acc:HGNC:4799]	PCAdmix_DOG
	ENSCAFG00000011252	LEF1	LEF1	32	28514867	28633575	-1		LEF1	lymphoid enhancer-binding factor 1	lymphoid enhancer binding factor 1 [Source:HGNC Symbol;Acc:HGNC:6551]	PCAdmix_DOG
	ENSCAFG00000011286	OSTC	OSTC	32	29017421	29028119	1		OSTC	oligosaccharyltransferase complex subunit (non-catalytic)	Oligosaccharyltransferase complex subunit OSTC [Source:UniProtKB/Swiss-Prot;Acc:P86218]	PCAdmix_DOG
	ENSCAFG00000011314	ETNPPL	ETNPPL	32	29055760	29220621	-1				ethanolamine-phosphate phospho-lyase [Source:HGNC Symbol;Acc:HGNC:14404]	PCAdmix_DOG
	ENSCAFG00000011361	COL25A1	COL25A1	32	29128791	29333528	-1				collagen type XXV alpha 1 [Source:HGNC Symbol;Acc:HGNC:18603]	PCAdmix_DOG
	ENSCAFG00000011382			32	29400201	29400593	1					PCAdmix_DOG
	ENSCAFG00000024694			32	29565662	29568685	-1					PCAdmix_DOG
	ENSCAFG00000011407	SEC24B	SEC24B	32	29671152	29765891	1		SEC24B	SEC24 homolog B, COPII coat complex component	SEC24 homolog B, COPII coat complex component [Source:HGNC Symbol;Acc:HGNC:10704]	PCAdmix_DOG
	ENSCAFG00000011415	CCDC109B	CCDC109B	32	29793708	29890579	1		CCDC109B	coiled-coil domain containing 109B	coiled-coil domain containing 109B [Source:HGNC Symbol;Acc:HGNC:26076]	PCAdmix_DOG
	ENSCAFG00000031783		CASP6	32	29895830	29910822	-1		CASP6	caspase 6, apoptosis-related cysteine peptidase		PCAdmix_DOG
	ENSCAFG00000011462	CFI	CFI	32	29916298	29986135	-1		PLA2G12A	phospholipase A2, group XIIA	complement factor I [Source:HGNC Symbol;Acc:HGNC:5394]	PCAdmix_DOG
	ENSCAFG00000011503	GAR1	GAR1	32	29996432	30004425	1				GAR1 ribonucleoprotein [Source:HGNC Symbol;Acc:HGNC:14264]	PCAdmix_DOG
	ENSCAFG00000011506	RRH	RRH	32	30008312	30027582	1		RRH	retinal pigment epithelium-derived rhodopsin homolog	retinal pigment epithelium-derived rhodopsin homolog [Source:HGNC Symbol;Acc:HGNC:10450]	PCAdmix_DOG
	ENSCAFG00000011519	LRIT3	LRIT3	32	30029869	30041996	1		LRIT3	leucine-rich repeat, immunoglobulin-like and transmembrane domains 3	leucine rich repeat, Ig-like and transmembrane domains 3 [Source:HGNC Symbol;Acc:HGNC:24783]	PCAdmix_DOG
	ENSCAFG00000011532	EGF	EGF	32	30074079	30168686	1		EGF	epidermal growth factor	pro-epidermal growth factor precursor [Source:RefSeq peptide;Acc:NP_001003094]	PCAdmix_DOG
	ENSCAFG00000011549	ELOVL6	ELOVL6	32	30225252	30360478	-1		ELOVL6	ELOVL fatty acid elongase 6	ELOVL fatty acid elongase 6 [Source:HGNC Symbol;Acc:HGNC:15829]	PCAdmix_DOG
	ENSCAFG00000011580	ENPEP	ENPEP	32	30553182	30638486	1		ENPEP	glutamyl aminopeptidase (aminopeptidase A)	glutamyl aminopeptidase [Source:HGNC Symbol;Acc:HGNC:3355]	PCAdmix_DOG
	ENSCAFG00000011628	PITX2	PITX2	32	30710127	30715919	-1		PITX2	paired-like homeodomain 2	paired like homeodomain 2 [Source:HGNC Symbol;Acc:HGNC:9005]	PCAdmix_DOG
	ENSCAFG00000030091			32	30753341	30753592	1					PCAdmix_DOG
	ENSCAFG00000011634			32	31147725	31148396	-1					PCAdmix_DOG
	ENSCAFG00000011636	C4orf32	C4orf32	32	31989841	32029631	1		C32H4orf32	chromosome 32 open reading frame, human C4orf32	chromosome 4 open reading frame 32 [Source:HGNC Symbol;Acc:HGNC:26813]	PCAdmix_DOG
	ENSCAFG00000031989			32	31990311	31991078	-1					PCAdmix_DOG
	ENSCAFG00000011643	AP1AR	AP1AR	32	32083432	32122200	1		AP1AR	adaptor-related protein complex 1 associated regulatory protein	adaptor related protein complex 1 associated regulatory protein [Source:HGNC Symbol;Acc:HGNC:28808]	PCAdmix_DOG
	ENSCAFG00000011654	TIFA	TIFA	32	32126624	32135188	-1				TRAF interacting protein with forkhead associated domain [Source:HGNC Symbol;Acc:HGNC:19075]	PCAdmix_DOG
	ENSCAFG00000011670	ALPK1	ALPK1	32	32143891	32269130	1		ALPK1	alpha-kinase 1	alpha kinase 1 [Source:HGNC Symbol;Acc:HGNC:20917]	PCAdmix_DOG
	ENSCAFG00000023617		LOC106558132	32	32159031	32160032	-1		LOC106558132	glyceraldehyde-3-phosphate dehydrogenase-like		PCAdmix_DOG
	ENSCAFG00000025325	NEUROG2	NEUROG2	32	32312097	32312915	-1		NEUROG2	neurogenin 2	neurogenin 2 [Source:HGNC Symbol;Acc:HGNC:13805]	PCAdmix_DOG
	ENSCAFG00000011703			32	32344809	32421468	-1					PCAdmix_DOG
	ENSCAFG00000011715	LARP7	LARP7	32	32421562	32438916	1		LARP7	La ribonucleoprotein domain family, member 7	La ribonucleoprotein domain family member 7 [Source:HGNC Symbol;Acc:HGNC:24912]	PCAdmix_DOG
	ENSCAFG00000011769	ANK2	ANK2	32	32813371	33144886	1		ANK2	ankyrin 2, neuronal	ankyrin 2, neuronal [Source:HGNC Symbol;Acc:HGNC:493]	PCAdmix_DOG
	ENSCAFG00000011847		TGIF1	32	32950116	32950934	-1		TGIF1	TGFB-induced factor homeobox 1		PCAdmix_DOG
	ENSCAFG00000012059	CAMK2D	CAMK2D	32	33223091	33525152	-1		CAMK2D	calcium/calmodulin-dependent protein kinase II delta	calcium/calmodulin dependent protein kinase II delta [Source:HGNC Symbol;Acc:HGNC:1462]	PCAdmix_DOG
	ENSCAFG00000012156	arsj	arsj	32	33632677	33716477	-1		ARSJ	arylsulfatase family, member J	arylsulfatase family member J [Source:HGNC Symbol;Acc:HGNC:26286]	PCAdmix_DOG
	ENSCAFG00000030808			32	33866261	33866957	1					PCAdmix_DOG
	ENSCAFG00000029954			32	34069658	34070408	1					PCAdmix_DOG
	ENSCAFG00000012173	UGT8	UGT8	32	34147711	34233475	1		UGT8	UDP glycosyltransferase 8	UDP glycosyltransferase 8 [Source:HGNC Symbol;Acc:HGNC:12555]	PCAdmix_DOG
	ENSCAFG00000012211	NDST4	NDST4	32	34347384	34606491	-1		NDST4	N-deacetylase/N-sulfotransferase (heparan glucosaminyl) 4	N-deacetylase/N-sulfotransferase 4 [Source:HGNC Symbol;Acc:HGNC:20779]	PCAdmix_DOG
	ENSCAFG00000012283	PSMC6	PSMC6	32	35815133	35816317	-1		PSMC6	proteasome 26S subunit, ATPase 6	proteasome 26S subunit, ATPase 6 [Source:HGNC Symbol;Acc:HGNC:9553]	PCAdmix_DOG
	ENSCAFG00000031103			32	35859951	35861421	-1					PCAdmix_DOG
	ENSCAFG00000030514	TRAM1L1	TRAM1L1	32	36488434	36489546	-1		TRAM1L1	translocation associated membrane protein 1-like 1	translocation associated membrane protein 1-like 1 [Source:HGNC Symbol;Acc:HGNC:28371]	PCAdmix_DOG
	ENSCAFG00000012299	NDST3	NDST3	32	37322173	37488031	1		NDST3	N-deacetylase/N-sulfotransferase (heparan glucosaminyl) 3	N-deacetylase/N-sulfotransferase 3 [Source:HGNC Symbol;Acc:HGNC:7682]	PCAdmix_DOG
	ENSCAFG00000012328	PRSS12	PRSS12	32	37509968	37587155	-1		PRSS12	protease, serine, 12 (neurotrypsin, motopsin)	protease, serine 12 [Source:HGNC Symbol;Acc:HGNC:9477]	PCAdmix_DOG
	ENSCAFG00000011182			32	37593359	37594046	1					PCAdmix_DOG
	ENSCAFG00000025409	METTL14	METTL14	32	37653166	37678325	1				methyltransferase like 14 [Source:HGNC Symbol;Acc:HGNC:29330]	PCAdmix_DOG
	ENSCAFG00000012345	SEC24D	SEC24D	32	37688740	37792611	-1		SEC24D	SEC24 homolog D, COPII coat complex component	SEC24 homolog D, COPII coat complex component [Source:HGNC Symbol;Acc:HGNC:10706]	PCAdmix_DOG
	ENSCAFG00000012424	SYNPO2	SYNPO2	32	37844651	38026805	1		SYNPO2	synaptopodin 2	synaptopodin 2 [Source:HGNC Symbol;Acc:HGNC:17732]	PCAdmix_DOG
	ENSCAFG00000012432	MYOZ2	MYOZ2	32	38089185	38132047	1		MYOZ2	myozenin 2	myozenin 2 [Source:HGNC Symbol;Acc:HGNC:1330]	PCAdmix_DOG
	ENSCAFG00000012449	USP53	USP53	32	38163790	38211181	1		USP53	ubiquitin specific peptidase 53	ubiquitin specific peptidase 53 [Source:HGNC Symbol;Acc:HGNC:29255]	PCAdmix_DOG
	ENSCAFG00000012457			32	38217979	38218185	-1					PCAdmix_DOG
	ENSCAFG00000012462	FABP2	FABP2	32	38244028	38248066	-1		FABP2	fatty acid binding protein 2, intestinal	fatty acid binding protein 2 [Source:HGNC Symbol;Acc:HGNC:3556]	PCAdmix_DOG
	ENSCAFG00000012472	PDE5A	PDE5A	32	38275356	38407235	-1		PDE5A	phosphodiesterase 5A, cGMP-specific	cGMP-specific 3',5'-cyclic phosphodiesterase [Source:UniProtKB/Swiss-Prot;Acc:O77746]	PCAdmix_DOG
	ENSCAFG00000012479			32	38605169	38605456	-1					PCAdmix_DOG
	ENSCAFG00000012482		LOC100685341	32	38677179	38716253	-1		LOC100685341	rho GTPase-activating protein 20-like		PCAdmix_DOG
	ENSCAFG00000010253	KIAA1524	KIAA1524	33	13808847	13843147	-1		KIAA1524	KIAA1524 ortholog	KIAA1524 [Source:HGNC Symbol;Acc:HGNC:29302]	PCAdmix_DOG
	ENSCAFG00000010280	DZIP3	DZIP3	33	13842923	13927112	1		DZIP3	DAZ interacting zinc finger protein 3	DAZ interacting zinc finger protein 3 [Source:HGNC Symbol;Acc:HGNC:30938]	PCAdmix_DOG
	ENSCAFG00000030882	TRAT1	TRAT1	33	14033544	14071359	1		TRAT1	T cell receptor associated transmembrane adaptor 1	T cell receptor associated transmembrane adaptor 1 [Source:HGNC Symbol;Acc:HGNC:30698]	PCAdmix_DOG
	ENSCAFG00000010299	GUCA1C	GUCA1C	33	14106694	14140990	-1		GUCA1C	guanylate cyclase activator 1C	guanylate cyclase activator 1C [Source:HGNC Symbol;Acc:HGNC:4680]	PCAdmix_DOG
	ENSCAFG00000010316	MORC1	MORC1	33	14145099	14302947	-1				MORC family CW-type zinc finger 1 [Source:HGNC Symbol;Acc:HGNC:7198]	PCAdmix_DOG
	ENSCAFG00000010331			33	14457713	14463803	-1					PCAdmix_DOG
	ENSCAFG00000010335			33	14485605	14493209	-1					PCAdmix_DOG
	ENSCAFG00000010879	IGSF11	IGSF11	33	22640775	22766435	-1		IGSF11	immunoglobulin superfamily, member 11	immunoglobulin superfamily member 11 [Source:HGNC Symbol;Acc:HGNC:16669]	PCAdmix_DOG
	ENSCAFG00000010886		C33H3orf30	33	22841371	22855942	1		C33H3orf30	chromosome 33 open reading frame, human C3orf30		PCAdmix_DOG
	ENSCAFG00000010888	UPK1B	UPK1B	33	22866645	22896354	1		UPK1B	uroplakin 1B	uroplakin 1B [Source:HGNC Symbol;Acc:HGNC:12578]	PCAdmix_DOG
	ENSCAFG00000010905	B4GALT4	B4GALT4	33	22902375	22928826	-1		B4GALT4	UDP-Gal:betaGlcNAc beta 1,4- galactosyltransferase, polypeptide 4	beta-1,4-galactosyltransferase 4 [Source:HGNC Symbol;Acc:HGNC:927]	PCAdmix_DOG
	ENSCAFG00000010917	ARHGAP31	ARHGAP31	33	22965613	23074850	1		ARHGAP31	Rho GTPase activating protein 31	Rho GTPase activating protein 31 [Source:HGNC Symbol;Acc:HGNC:29216]	PCAdmix_DOG
	ENSCAFG00000010926	TMEM39A	TMEM39A	33	23085163	23116210	-1		TMEM39A	transmembrane protein 39A	transmembrane protein 39A [Source:HGNC Symbol;Acc:HGNC:25600]	PCAdmix_DOG
	ENSCAFG00000010943	POGLUT1	POGLUT1	33	23122291	23152469	1		POGLUT1	protein O-glucosyltransferase 1	protein O-glucosyltransferase 1 [Source:HGNC Symbol;Acc:HGNC:22954]	PCAdmix_DOG
	ENSCAFG00000010977	TIMMDC1	TIMMDC1	33	23154225	23175178	1		TIMMDC1	translocase of inner mitochondrial membrane domain containing 1	translocase of inner mitochondrial membrane domain containing 1 [Source:HGNC Symbol;Acc:HGNC:1321]	PCAdmix_DOG
	ENSCAFG00000010997	CD80	CD80	33	23177136	23201380	-1		CD80	CD80 molecule	CD80 molecule [Source:HGNC Symbol;Acc:HGNC:1700]	PCAdmix_DOG
	ENSCAFG00000011006	ADPRH	ADPRH	33	23221091	23224527	1		ADPRH	ADP-ribosylarginine hydrolase	ADP-ribosylarginine hydrolase [Source:HGNC Symbol;Acc:HGNC:269]	PCAdmix_DOG
	ENSCAFG00000030985	POPDC2	POPDC2	33	23288980	23296049	-1		POPDC2	popeye domain containing 2	popeye domain containing 2 [Source:HGNC Symbol;Acc:HGNC:17648]	PCAdmix_DOG
	ENSCAFG00000011029	COX17	COX17	33	23305119	23313022	-1		COX17	COX17 homolog, cytochrome c oxidase assembly protein (yeast)	Cytochrome c oxidase copper chaperone [Source:UniProtKB/Swiss-Prot;Acc:Q6J3Q7]	PCAdmix_DOG
	ENSCAFG00000011045	MAATS1	MAATS1	33	23323911	23405791	1		MAATS1	MYCBP-associated, testis expressed 1	MYCBP associated and testis expressed 1 [Source:HGNC Symbol;Acc:HGNC:24010]	PCAdmix_DOG
	ENSCAFG00000011094	NR1I2	NR1I2	33	23431579	23455347	1				nuclear receptor subfamily 1 group I member 2 [Source:HGNC Symbol;Acc:HGNC:7968]	PCAdmix_DOG
	ENSCAFG00000011122	GSK3B	GSK3B	33	23460534	23659666	-1		GSK3B	glycogen synthase kinase 3 beta	glycogen synthase kinase 3 beta [Source:HGNC Symbol;Acc:HGNC:4617]	PCAdmix_DOG
	ENSCAFG00000011154	GPR156	GPR156	33	23719948	23774338	-1		GPR156	G protein-coupled receptor 156	G protein-coupled receptor 156 [Source:HGNC Symbol;Acc:HGNC:20844]	PCAdmix_DOG
	ENSCAFG00000011160	LRRC58	LRRC58	33	23847086	23862146	-1				leucine rich repeat containing 58 [Source:HGNC Symbol;Acc:HGNC:26968]	PCAdmix_DOG
	ENSCAFG00000011172	FSTL1	FSTL1	33	23891611	23931141	-1				follistatin like 1 [Source:HGNC Symbol;Acc:HGNC:3972]	PCAdmix_DOG
	ENSCAFG00000011204	NDUFB4	NDUFB4	33	24044205	24051550	1		NDUFB4	NADH dehydrogenase (ubiquinone) 1 beta subcomplex, 4, 15kDa	NADH:ubiquinone oxidoreductase subunit B4 [Source:HGNC Symbol;Acc:HGNC:7699]	PCAdmix_DOG
	ENSCAFG00000011254	HGD	HGD	33	24062947	24107710	-1		HGD	homogentisate 1,2-dioxygenase	homogentisate 1,2-dioxygenase [Source:HGNC Symbol;Acc:HGNC:4892]	PCAdmix_DOG
	ENSCAFG00000011292	RABL3	RABL3	33	24116495	24151354	-1				RAB, member of RAS oncogene family like 3 [Source:HGNC Symbol;Acc:HGNC:18072]	PCAdmix_DOG
	ENSCAFG00000011306	GTF2E1	GTF2E1	33	24156248	24201488	1		GTF2E1	general transcription factor IIE, polypeptide 1, alpha 56kDa	general transcription factor IIE subunit 1 [Source:HGNC Symbol;Acc:HGNC:4650]	PCAdmix_DOG
[truncated: 240 more rows]

## Sheet: Table S1d
	Table S1d Enrichment in gene ontology (GO) categories of the dog excess genes surrounding the outlier dog-like SNPs identified from PCADMIX
	Term ID	Term type	Term group	Term name	Term depth	p-value	Q&T list
	GO:0032502	BP	37	developmental process	1	0.0229	OLIG3,TNFAIP3,CITED2,ADGRG6,HIVEP2,PLAGL1,EPM2A,SASH1,TAB2,LATS1,MTHFD1L,ESR1,SYNE1,FBXO5,NOX3,EZR,VGLL2,ROS1,GOPC,ASF1A,TBC1D32,ZHX2,FABP7,RSPO3,THEMIS,LAMA2,ARHGAP18,L3MBTL3,HSD17B3,PTCH1,HSP90AB1,ENSCAFG00000002008,CLIC5,ADGRF5,TNFRSF21,C2ORF40,FHL2,C2ORF49,TFAP2B,PKHD1,RFX8,PDCL3,PHF14,BMP5,ZAP70,SEMA4C,CNNM4,FER1L5,BEND6,RAB23,DYNC2LI1,TGFBR1,SIX3,SIX2,INVS,PLPPR1,GRIN3A,EPAS1,RHOQ,SOCS5,TTC…
	GO:0098727	BP	37	maintenance of cell number	2	0.0279	ZHX2,SIX2,KLF4,DLL1,MED17,HOOK3,JAG1,SFRP1,LSM1,CUL4A,FUT10,PCM1,KDM2B,CNOT1,SETD6,TBX3,PIWIL2,LDB1,TRIM8,MED10,SOX2,EIF4ENIF1,METTL14,LIF,ZFP36L2
	GO:0044767	BP	37	single-organism developmental process	2	0.0175	OLIG3,TNFAIP3,CITED2,ADGRG6,HIVEP2,PLAGL1,EPM2A,SASH1,TAB2,LATS1,MTHFD1L,ESR1,SYNE1,FBXO5,NOX3,EZR,VGLL2,ROS1,GOPC,ASF1A,TBC1D32,ZHX2,FABP7,RSPO3,THEMIS,LAMA2,ARHGAP18,L3MBTL3,HSD17B3,PTCH1,HSP90AB1,ENSCAFG00000002008,CLIC5,ADGRF5,TNFRSF21,C2ORF40,FHL2,C2ORF49,TFAP2B,PKHD1,RFX8,PDCL3,PHF14,BMP5,ZAP70,SEMA4C,CNNM4,FER1L5,BEND6,RAB23,DYNC2LI1,TGFBR1,SIX3,SIX2,INVS,PLPPR1,GRIN3A,EPAS1,RHOQ,SOCS5,TTC…
	GO:0051093	BP	37	negative regulation of developmental process	1	0.0249	ZHX2,PTCH1,TNFRSF21,PHF14,SEMA4C,TGFBR1,SIX3,SIX2,SOCS5,RTN4,KLF4,EFEMP1,LPAR1,MEIS1,EPHA7,NOCT,BBS12,DLL1,LIMS2,TMEM176B,CDK5,CLASP1,GLI2,INSIG1,HOOK3,DKK4,XDH,JAG1,NKX6-3,SFRP1,ENSCAFG00000005828,COL4A2,LSM1,ADRB3,NDFIP1,CUL4A,NRG1,GAS6,TMEM178A,DPYSL3,ANGPT4,TRIB3,FAM101A,PCM1,ASXL1,HHEX,PIK3R1,WWC2,ENSCAFG00000008621,CCL17,GNRH1,ENSCAFG00000009107,BBS2,ANKRD2,TBX5,TBX3,SFRP5,DMTN,LDB1,SEMA5A,…
	GO:0048869	BP	37	cellular developmental process	1	0.0472	OLIG3,CITED2,PLAGL1,LATS1,ESR1,SYNE1,FBXO5,EZR,ROS1,GOPC,ASF1A,TBC1D32,ZHX2,FABP7,THEMIS,LAMA2,ARHGAP18,L3MBTL3,PTCH1,ENSCAFG00000002008,CLIC5,ADGRF5,TNFRSF21,C2ORF40,FHL2,TFAP2B,PKHD1,BMP5,ZAP70,SEMA4C,FER1L5,BEND6,RAB23,DYNC2LI1,TGFBR1,SIX3,SIX2,GRIN3A,EPAS1,RHOQ,SOCS5,EPCAM,MSH2,FSHR,PSME4,RTN4,MEI4,CCDC88A,KLF4,PHIP,PNPT1,AKAP2,EFEMP1,VRK2,BCL11A,CYB5R4,LPAR1,CEP162,FAM161A,B3GNT2,UBE2J1,TMEM…
	GO:0019827	BP	37	stem cell population maintenance	1	0.0184	ZHX2,SIX2,KLF4,DLL1,MED17,HOOK3,JAG1,SFRP1,LSM1,CUL4A,FUT10,PCM1,KDM2B,CNOT1,SETD6,TBX3,PIWIL2,LDB1,TRIM8,MED10,SOX2,EIF4ENIF1,METTL14,LIF,ZFP36L2
	GO:0007417	BP	37	central nervous system development	1	0.0174	OLIG3,CITED2,FABP7,PTCH1,TNFRSF21,SEMA4C,SIX3,RTN4,EPHA7,POU3F3,PCDH18,SPATA5,FGF2,DLL1,BIN1,CDK5,GBX1,GLI2,RHEB,MNX1,DCT,HOOK3,MKKS,SFRP1,ENSCAFG00000005828,PLCB1,TACC1,FGFR1,COL4A1,ADGRA2,UNC5D,ATRN,FUT10,SOS1,NRG1,DRGX,SOX12,PCM1,EIF2B1,HHEX,HELT,KDM2B,NDRG4,TCTN1,DPYSL2,SLIT1,LHX5,BBS2,TBX3,CRTAC1,DNAH5,SUDS3,LDB1,UNC5C,SUFU,INA,FOXN4,GSK3B,LEF1,SEC24B,EGF,PITX2,SOX2,SEZ6L,EIF2B5,NF2,TACC2,HM…
	GO:0007420	BP	37	brain development	1	0.0434	FABP7,PTCH1,SEMA4C,SIX3,RTN4,EPHA7,POU3F3,PCDH18,SPATA5,FGF2,DLL1,CDK5,GLI2,DCT,HOOK3,MKKS,SFRP1,PLCB1,TACC1,FGFR1,COL4A1,ATRN,FUT10,SOS1,NRG1,PCM1,HHEX,KDM2B,NDRG4,TCTN1,DPYSL2,SLIT1,LHX5,BBS2,TBX3,CRTAC1,DNAH5,SUDS3,LDB1,UNC5C,INA,GSK3B,LEF1,SEC24B,EGF,PITX2,SOX2,SEZ6L,NF2,TACC2,HMX3,HMX2,EPHB3,TRA2B,APOD,BCR,STK36,CDK5R2,ABCB6,KCNA1,DKK1,FAS,NOTCH3,ERBB4,ADGRG1,NKX2-6,ENSCAFG00000025531,ENSCAF…
	GO:0051241	BP	18	negative regulation of multicellular organismal process	1	0.0141	TNFAIP3,EZR,ZHX2,PTCH1,TNFRSF21,CD2AP,IL1R2,PHF14,SEMA4C,ABCG5,ABCG8,TGFBR1,PPM1B,SIX3,SOCS5,FSHR,RTN4,KLF4,EFEMP1,LPAR1,REL,MEIS1,EPHA7,NOCT,ARHGAP42,HS3ST5,DLL1,LIMS2,PROC,TMEM176B,NOS3,CDK5,GLI2,HOOK3,DKK4,XDH,JAG1,SFRP1,ENSCAFG00000005828,FGFR1,PRNP,COL4A2,LSM1,ADRB3,RAB11FIP1,GFRA4,NDFIP1,CUL4A,NRG1,GAS6,TMEM178A,DPYSL3,ANGPT4,FAM101A,PCM1,F11,KLKB1,HHEX,PIK3R1,FFAR4,WWC2,P2RX4,P2RX7,ATP2A2,…
	GO:1904950	BP	85	negative regulation of establishment of protein localization	1	0.0418	EZR,IL1R2,RAB23,PPM1B,RHOQ,ERLEC1,UBE2J1,CDK5,SFRP1,BAG4,RAB11FIP1,NDFIP1,GAS6,PKDCC,BCL-XL,FFAR4,SFRP5,DMTN,SUFU,SIRT4,BANK1,PFKL,GSK3B,STXBP5L,APOD,ADIPOQ,DERL3,BARD1,TMBIM1,ERP29,SVIP
	GO:0035372	BP	48	protein localization to microtubule	1	0.0255	CRIPT,DIAPH1,CHAMP1,KIF20B,GSK3B
	GO:0006793	BP	67	phosphorus metabolic process	1	0.0465	TNFAIP3,ARFGEF3,EPM2A,GRM1,SASH1,TAB2,LATS1,PPP1R14C,AKAP12,VIP,SNX9,SYNJ2,EZR,ROS1,SERINC1,SMPDL3A,TPD52L1,PTPRK,CDC14B,FBP1,DAPK1,HSP90AB1,ADGRF5,C2ORF40,NCK2,MAP4K4,PKHD1,RNF149,PDCL3,INPP4A,BMP5,ZAP70,SEMA4C,OXER1,HAAO,TGFBR1,PPM1B,PLPPR1,ALDOB,PRKCE,RHOQ,PIGF,SOCS5,MSH2,LHCGR,FSHR,ABCA1,SPTBN1,FKTN,CCDC88A,TTK,PPP4R3B,PTPN3,EFEMP1,PGM3,VRK2,ME1,LPAR1,ANKRD6,MAP3K7,SPRED2,EPHA7,GAB1,INPP4B,IL…
	GO:0051174	BP	67	regulation of phosphorus metabolic process	1	0.0132	TNFAIP3,ARFGEF3,GRM1,SASH1,TAB2,LATS1,PPP1R14C,AKAP12,VIP,SNX9,EZR,ROS1,TPD52L1,FBP1,HSP90AB1,ADGRF5,C2ORF40,NCK2,PKHD1,RNF149,PDCL3,BMP5,SEMA4C,OXER1,TGFBR1,PRKCE,SOCS5,LHCGR,FSHR,ABCA1,FKTN,CCDC88A,VRK2,ME1,LPAR1,ANKRD6,MAP3K7,SPRED2,EPHA7,GAB1,FGF2,IL21,IL2,RARRES2,NIFK,CDK5,PRKAG2,SH2D4A,DNAJC3,IKBKB,XDH,SFRP1,ADAM9,PLCB1,FGFR1,PRNP,ANKLE2,BAG4,TAF7,MAVS,ADRB3,HDAC3,CDC25B,SPRY4,NRG1,DDRGK1,S…
	GO:0019220	BP	67	regulation of phosphate metabolic process	2	0.0126	TNFAIP3,ARFGEF3,GRM1,SASH1,TAB2,LATS1,PPP1R14C,AKAP12,VIP,SNX9,EZR,ROS1,TPD52L1,FBP1,HSP90AB1,ADGRF5,C2ORF40,NCK2,PKHD1,RNF149,PDCL3,BMP5,SEMA4C,OXER1,TGFBR1,PRKCE,SOCS5,LHCGR,FSHR,ABCA1,FKTN,CCDC88A,VRK2,ME1,LPAR1,ANKRD6,MAP3K7,SPRED2,EPHA7,GAB1,FGF2,IL21,IL2,RARRES2,NIFK,CDK5,PRKAG2,SH2D4A,DNAJC3,IKBKB,XDH,SFRP1,ADAM9,PLCB1,FGFR1,PRNP,ANKLE2,BAG4,TAF7,MAVS,ADRB3,HDAC3,CDC25B,SPRY4,NRG1,DDRGK1,S…
	GO:0065009	BP	64	regulation of molecular function	1	0.0351	TNFAIP3,ARFGEF3,PHACTR2,GRM1,SASH1,TAB2,LATS1,PLEKHG1,ESR1,VIP,FBXO5,SNX9,TPD52L1,CDC14B,HABP4,PTCH1,DAPK1,HSP90AB1,RCAN2,C2ORF40,NCK2,TFAP2B,PKHD1,TBC1D8,TGFBR1,ALDOB,PRKCE,SOCS5,MSH2,MSH6,LHCGR,FSHR,ZNF462,ENSCAFG00000002790,CCDC88A,KLF4,HMGN3,PTPN3,LPAR1,CCT4,COMMD1,CASP8AP2,MAP3K7,PELI1,SPRED2,EPHA7,GAB1,TBC1D9,ARHGAP42,FGF2,HDAC2,NOS3,NIFK,CDK5,AGAP3,SMARCD3,PRKAG2,PSD3,SH2D4A,EHD3,IKBKB,XDH…
	GO:0043085	BP	21	positive regulation of catalytic activity	1	0.0109	ARFGEF3,GRM1,SASH1,TAB2,PLEKHG1,VIP,SNX9,TPD52L1,CDC14B,DAPK1,NCK2,TBC1D8,TGFBR1,ALDOB,PRKCE,MSH2,MSH6,LHCGR,FSHR,CCDC88A,KLF4,LPAR1,CCT4,CASP8AP2,MAP3K7,GAB1,TBC1D9,ARHGAP42,FGF2,CDK5,AGAP3,PRKAG2,PSD3,XDH,ADAM9,FGFR1,ARHGEF7,ADRB3,CDC25B,ARAP3,MCF2L,ARHGAP26,ARHGEF33,GRTP1,DCUN1D2,NRG1,WRN,GAS6,MAP4K3,RASA3,MAPK8,ARHGAP22,ERCC6,ADGRD1,FZD10,TRIB3,SCARB1,TPX2,ACSL1,DIABLO,PLCE1,TBC1D12,ARHGEF28,…
	GO:0031281	BP	21	positive regulation of cyclase activity	2	0.0461	VIP,LHCGR,FSHR,ADRB3,MAPK8,ADGRD1,NOS1,GUCA1C
	GO:0061307	BP	25	cardiac neural crest cell differentiation involved in heart development	1	0.0246	CITED2,JAG1,PITX2,MAPK1
	GO:0061308	BP	25	cardiac neural crest cell development involved in heart development	1	0.0246	CITED2,JAG1,PITX2,MAPK1
	GO:0043412	BP	72	macromolecule modification	1	0.0468	TNFAIP3,ADAT2,EPM2A,FBXO30,SHPRH,GRM1,SASH1,TAB2,PPIL4,LATS1,PCMT1,ARMT1,FBXO5,ZDHHC14,SNX9,EZR,ROS1,NUS1,MAN1A1,ENSCAFG00000001028,TPD52L1,RNF146,PTPRK,CDC14B,DAPK1,HSP90AB1,AARS2,ST6GAL2,ENSCAFG00000002084,C2ORF40,NCK2,MAP4K4,PKHD1,RNF149,PDCL3,MGAT4A,BMP5,ZAP70,SEMA4C,KANSL3,ZNF451,GALNT12,TGFBR1,ALG2,PPM1B,CAMKMT,RNF20,PRKCE,PIGF,SOCS5,FBXO11,FSHR,ASB3,ABCA1,SPTBN1,FKTN,CCDC88A,IKBKAP,TTK,PPP…
	GO:0036211	BP	72	protein modification process	1	0.05	TNFAIP3,EPM2A,FBXO30,SHPRH,GRM1,SASH1,TAB2,PPIL4,LATS1,PCMT1,ARMT1,FBXO5,ZDHHC14,SNX9,EZR,ROS1,NUS1,MAN1A1,ENSCAFG00000001028,TPD52L1,RNF146,PTPRK,CDC14B,DAPK1,HSP90AB1,ST6GAL2,ENSCAFG00000002084,C2ORF40,NCK2,MAP4K4,PKHD1,RNF149,PDCL3,MGAT4A,BMP5,ZAP70,SEMA4C,KANSL3,ZNF451,GALNT12,TGFBR1,ALG2,PPM1B,CAMKMT,RNF20,PRKCE,PIGF,SOCS5,FBXO11,FSHR,ASB3,ABCA1,SPTBN1,FKTN,CCDC88A,TTK,PPP4R3B,PTPN3,EFEMP1,P…
	GO:0006464	BP	72	cellular protein modification process	1	0.05	TNFAIP3,EPM2A,FBXO30,SHPRH,GRM1,SASH1,TAB2,PPIL4,LATS1,PCMT1,ARMT1,FBXO5,ZDHHC14,SNX9,EZR,ROS1,NUS1,MAN1A1,ENSCAFG00000001028,TPD52L1,RNF146,PTPRK,CDC14B,DAPK1,HSP90AB1,ST6GAL2,ENSCAFG00000002084,C2ORF40,NCK2,MAP4K4,PKHD1,RNF149,PDCL3,MGAT4A,BMP5,ZAP70,SEMA4C,KANSL3,ZNF451,GALNT12,TGFBR1,ALG2,PPM1B,CAMKMT,RNF20,PRKCE,PIGF,SOCS5,FBXO11,FSHR,ASB3,ABCA1,SPTBN1,FKTN,CCDC88A,TTK,PPP4R3B,PTPN3,EFEMP1,P…
	GO:0044712	BP	62	single-organism catabolic process	1	0.0251	SMPDL3A,FBP1,ENPP4,CYP39A1,PLA2G7,HAAO,SEC61B,ALDOB,PRKCE,ERLEC1,BCKDHB,UBE2J1,ENSCAFG00000003774,RARRES2,NOS3,TMUB1,PRKAG2,XDH,IDO2,PLCB4,PLCB1,DDHD2,ERLIN2,UBXN8,LOC477441,SCARB1,HM13,CYP26A1,PLCE1,P2RX7,PGAM1,ENTPD4,AMFR,HOGA1,MMP2,GOT1,ERLIN1,NUDT18,MTRR,LPL,PLA2G1B,PDE9A,BDH2,PFKL,ACACB,DAO,HGD,CFI,INPP5F,PSMC6,PDE5A,ACADSB,OAT,RNF185,EHHADH,LIPH,IDH1,ADIPOQ,DERL3,MMP11,ENSCAFG00000014154,UF…
	GO:0070727	BP	52	cellular macromolecule localization	1	0.0361	TNFAIP3,STX11,LATS1,AKAP12,ESR1,SYNE1,SNX9,TULP4,ENSCAFG00000000657,SYTL3,EZR,TBC1D32,PTPRK,PTCH1,CD2AP,TGFBRAP1,TBC1D8,TRAM2,RAB23,TGFBR1,SEC61B,PPM1B,STX17,SIX3,SIX2,RHOQ,CRIPT,TTC7A,OR13C4,ERLEC1,SPTBN1,ASNA1,UGCG,XPO1,CCT4,COMMD1,UBE2J1,CEP68,ENSCAFG00000003479,GRIK2,TBC1D9,MGARP,BBS12,CDK5,EHD3,HOOK3,DZIP1,IKBKB,AP3M2,ANK1,GOLGA7,C8ORF4,BAG4,DIAPH1,MAVS,HDAC3,LAMP1,GRTP1,NRG1,GAS6,TEX15,PKDC…
	GO:0034613	BP	52	cellular protein localization	1	0.0277	TNFAIP3,STX11,LATS1,AKAP12,ESR1,SYNE1,SNX9,TULP4,ENSCAFG00000000657,SYTL3,EZR,TBC1D32,PTPRK,PTCH1,CD2AP,TGFBRAP1,TBC1D8,TRAM2,RAB23,TGFBR1,SEC61B,PPM1B,STX17,SIX3,SIX2,RHOQ,CRIPT,TTC7A,OR13C4,ERLEC1,SPTBN1,ASNA1,UGCG,XPO1,CCT4,COMMD1,UBE2J1,CEP68,ENSCAFG00000003479,GRIK2,TBC1D9,MGARP,BBS12,CDK5,EHD3,HOOK3,DZIP1,IKBKB,AP3M2,ANK1,GOLGA7,C8ORF4,BAG4,DIAPH1,MAVS,HDAC3,LAMP1,GRTP1,NRG1,GAS6,TEX15,PKDC…
	GO:0035690	BP	83	cellular response to drug	1	0.0382	FBP1,RNF149,PRNP,GAS6,ANKRD1,ENSCAFG00000009107,PPP3CA,EIF2B5,ADIPOQ,PPM1F,KCNH2,MT3
	GO:0090110	BP	20	cargo loading into COPII-coated vesicle	1	0.00541	RAB1A,INSIG1,SEC24B,TBC1D20
	GO:0072659	BP	69	protein localization to plasma membrane	1	0.0435	EZR,PTCH1,RHOQ,TTC7A,SPTBN1,EHD3,IKBKB,ANK1,GOLGA7,BAG4,GAS6,PKDCC,BCL-XL,RILPL1,RILPL2,PIK3R1,CLIP1,FCHO2,BBS2,TESC,TSPAN5,ANK2,AP2M1,DLG1,ADIPOQ,ABCA12,TMBIM1,VIL1,PRKCI,TNIK,PPIL2,RAB8A
	GO:0090002	BP	69	establishment of protein localization to plasma membrane	2	0.0432	EZR,PTCH1,RHOQ,TTC7A,SPTBN1,EHD3,IKBKB,ANK1,GOLGA7,GAS6,PKDCC,BCL-XL,RILPL1,RILPL2,PIK3R1,CLIP1,BBS2,TESC,TSPAN5,ANK2,DLG1,TMBIM1,VIL1,PRKCI
	GO:0072661	BP	69	protein targeting to plasma membrane	3	0.0353	PTCH1,SPTBN1,EHD3,ANK1,GAS6,TESC,ANK2
	GO:0032386	BP	16	regulation of intracellular transport	1	0.0394	EZR,NUS1,ZAP70,RAB23,TGFBR1,PPM1B,OR13C4,ERLEC1,UGCG,XPO1,UBE2J1,IWS1,CDK5,INSIG1,C8ORF4,BAG4,MAVS,HDAC3,LAMP1,NRG1,GAS6,RBPMS,RBCK1,MYLK2,PCM1,KIF20B,TLR3,PIK3R1,MAP1B,SFRP5,DMTN,MX2,SUFU,ICE1,PPP3CA,GSK3B,SEC24B,EGF,HCLS1,HPS4,PARL,PCNT,NEFH,GPR26,APOD,ADIPOQ,DERL3,ZDHHC8,BARD1,ECT2,CHERP,AKAP8L,ERBB4,GAS1,TBC1D20,PLAGL2,SVIP
	GO:0021846	BP	50	cell proliferation in forebrain	1	0.0266	FABP7,SIX3,POU3F3,DCT,HOOK3,FGFR1,PCM1,HHEX,LHX5
	HP:0100754	hp	23	Mania	1	0.05	ATP2A2,ARVCF,COMT,TBX1,UFD1L,HIRA
	HP:0007302	hp	23	Bipolar affective disorder	2	0.05	ATP2A2,ARVCF,COMT,TBX1,UFD1L,HIRA
	HP:0001660	hp	86	Truncus arteriosus	1	0.00772	RBP4,TENM3,ARHGAP31,BCR,ARVCF,COMT,TBX1,UFD1L,HIRA,ABCB6,CRKL,MAPK1,LOC609557,NKX2-6

## Sheet: Table_S2a
	Table_S2a Dog excess genes included in genomic regions within ROHs that were shared by all CWD individuals.
	Ensembl Gene ID	Associated Gene Name	Associated Gene Name + Wiki	Chromosome Name	Gene Start (bp)	Gene End (bp)	Strand	Phenotype description	WikiGene Name	WikiGene Description	Description	Method
	ENSCAFG00000024734	BPIFA3	BPIFA3	24	22457760	22469134	1		BPIFA3	BPI fold containing family A, member 3	BPI fold containing family A member 3 [Source:HGNC Symbol;Acc:HGNC:16204]	ROH_fixed
	ENSCAFG00000024453	BPIFA1	BPIFA1	24	22475212	22482712	1		BPIFA1	BPI fold containing family A, member 1	BPI fold containing family A member 1 [Source:HGNC Symbol;Acc:HGNC:15749]	ROH_fixed
	ENSCAFG00000007381	BPIFB1	BPIFB1	24	22510504	22531341	1		BPIFB1	BPI fold containing family B, member 1	BPI fold containing family B member 1 [Source:HGNC Symbol;Acc:HGNC:16108]	ROH_fixed
	ENSCAFG00000007395		LOC485836	24	22537056	22555981	1		LOC485836	uncharacterized LOC485836		ROH_fixed
	ENSCAFG00000007398			24	22567885	22582177	1					ROH_fixed
	ENSCAFG00000007403	CDK5RAP1	CDK5RAP1	24	22588195	22626969	-1		CDK5RAP1	CDK5 regulatory subunit associated protein 1	CDK5 regulatory subunit associated protein 1 [Source:HGNC Symbol;Acc:HGNC:15880]	ROH_fixed
	ENSCAFG00000007410	SNTA1	SNTA1	24	22636189	22661619	-1				syntrophin alpha 1 [Source:HGNC Symbol;Acc:HGNC:11167]	ROH_fixed
	ENSCAFG00000007420	CBFA2T2	CBFA2T2	24	22722786	22866484	1		CBFA2T2	core-binding factor, runt domain, alpha subunit 2; translocated to, 2	CBFA2/RUNX1 translocation partner 2 [Source:HGNC Symbol;Acc:HGNC:1536]	ROH_fixed
	ENSCAFG00000007429	NECAB3	NECAB3	24	22877676	22893851	-1		NECAB3	N-terminal EF-hand calcium binding protein 3	N-terminal EF-hand calcium binding protein 3 [Source:HGNC Symbol;Acc:HGNC:15851]	ROH_fixed
	ENSCAFG00000029918			24	22882514	22882639	1					ROH_fixed
	ENSCAFG00000007430			24	22886411	22887661	1					ROH_fixed
	ENSCAFG00000007435			24	22896232	22897059	-1					ROH_fixed
	ENSCAFG00000007443	PXMP4	PXMP4	24	22918673	22930191	-1		PXMP4	peroxisomal membrane protein 4, 24kDa	peroxisomal membrane protein 4 [Source:HGNC Symbol;Acc:HGNC:15920]	ROH_fixed
	ENSCAFG00000029879			24	22938064	22938750	-1					ROH_fixed
	ENSCAFG00000007460	ZNF341	ZNF341	24	22938093	22981587	1		ZNF341	zinc finger protein 341	zinc finger protein 341 [Source:HGNC Symbol;Acc:HGNC:15992]	ROH_fixed
	ENSCAFG00000007478	CHMP4B	CHMP4B	24	22995798	23051149	1		CHMP4B	charged multivesicular body protein 4B	charged multivesicular body protein 4B [Source:HGNC Symbol;Acc:HGNC:16171]	ROH_fixed
	ENSCAFG00000007490	RALY	RALY	24	23211141	23262511	1	Coat colour saddle tan vs black-and-tan	RALY	RALY heterogeneous nuclear ribonucleoprotein	RNA-binding protein Raly [Source:RefSeq peptide;Acc:NP_001271414]	ROH_fixed
	ENSCAFG00000007498	EIF2S2	EIF2S2	24	23269603	23283276	-1		EIF2S2	eukaryotic translation initiation factor 2, subunit 2 beta, 38kDa	eukaryotic translation initiation factor 2 subunit beta [Source:HGNC Symbol;Acc:HGNC:3266]	ROH_fixed
	ENSCAFG00000024967	ASIP	ASIP	24	23354642	23393918	1	Coat colour agouti	ASIP	agouti signaling protein	agouti signaling protein [Source:HGNC Symbol;Acc:HGNC:745]	ROH_fixed
	ENSCAFG00000007504	AHCY	AHCY	24	23411350	23423367	-1		AHCY	adenosylhomocysteinase	adenosylhomocysteinase [Source:HGNC Symbol;Acc:HGNC:343]	ROH_fixed
	ENSCAFG00000007508			24	23441676	23441927	1					ROH_fixed
	ENSCAFG00000007528		ITCH	24	23476392	23627681	1		ITCH	itchy E3 ubiquitin protein ligase		ROH_fixed
	ENSCAFG00000007547	DYNLRB1	DYNLRB1	24	23633604	23653272	1		DYNLRB1	dynein, light chain, roadblock-type 1	dynein light chain roadblock-type 1 [Source:HGNC Symbol;Acc:HGNC:15468]	ROH_fixed
	ENSCAFG00000007571	PIGU	PIGU	24	23670388	23768778	-1		PIGU	phosphatidylinositol glycan anchor biosynthesis, class U	phosphatidylinositol glycan anchor biosynthesis class U [Source:HGNC Symbol;Acc:HGNC:15791]	ROH_fixed
	ENSCAFG00000007559	MAP1LC3A	MAP1LC3A	24	23672344	23673492	1				microtubule associated protein 1 light chain 3 alpha [Source:HGNC Symbol;Acc:HGNC:6838]	ROH_fixed
	ENSCAFG00000007578	TP53INP2	TP53INP2	24	23796638	23798168	1		TP53INP2	tumor protein p53 inducible nuclear protein 2	tumor protein p53 inducible nuclear protein 2 [Source:HGNC Symbol;Acc:HGNC:16104]	ROH_fixed
	ENSCAFG00000007588	NCOA6	NCOA6	24	23802887	23866792	-1		NCOA6	nuclear receptor coactivator 6	nuclear receptor coactivator 6 [Source:HGNC Symbol;Acc:HGNC:15936]	ROH_fixed
	ENSCAFG00000007598	GGT7	GGT7	24	23898360	23924650	-1		GGT7	gamma-glutamyltransferase 7	gamma-glutamyltransferase 7 [Source:HGNC Symbol;Acc:HGNC:4259]	ROH_fixed
	ENSCAFG00000007637	ACSS2	ACSS2	24	23928670	23972633	1		ACSS2	acyl-CoA synthetase short-chain family member 2	acyl-CoA synthetase short-chain family member 2 [Source:HGNC Symbol;Acc:HGNC:15814]	ROH_fixed

## Sheet: Table_S2b
	Table S2b Enrichment in gene ontology (GO) categories of the dog excess genes included in genomic regions within ROHs that were shared by all CWD individuals.
	Term ID	Term type	Term group	Term name	Term depth	p-value	Q&T list
	GO:0000045	BP	2	autophagosome assembly	1	0.05	CHMP4B,MAP1LC3A,TP53INP2
	HP:0010899	hp	4	Abnormality of aspartate family amino acid metabolism	1	0.0447	AHCY
	HP:0004339	hp	4	Abnormality of sulfur amino acid metabolism	1	0.0323	AHCY
	HP:0010901	hp	4	Abnormality of methionine metabolism	2	0.0185	AHCY
	HP:0003235	hp	4	Hypermethioninemia	3	0.0093	AHCY
	HP:0000269	hp	16	Prominent occiput	1	0.0436	ITCH
	HP:0001134	hp	19	Anterior polar cataract	1	0.0197	CHMP4B
	HP:0011702	hp	3	Abnormal electrophysiology of sinoatrial node origin	1	0.0231	SNTA1
	HP:0001688	hp	3	Sinus bradycardia	2	0.0208	SNTA1
	HP:0001657	hp	8	Prolonged QT interval	1	0.0492	SNTA1
	HP:0005184	hp	8	Prolonged QTc interval	2	0.0357	SNTA1
	HP:0001139	hp	18	Choroideremia	1	0.0277	CHMP4B
	HP:0005135	hp	14	EKG: T-wave abnormalities	1	0.0368	SNTA1
	HP:0012266	hp	14	T-wave alternans	2	0.0311	SNTA1
	HP:0010700	hp	9	Total cataract	1	0.0151	CHMP4B
	HP:0004757	hp	17	Paroxysmal atrial fibrillation	1	0.0345	SNTA1
	HP:0001663	hp	10	Ventricular fibrillation	1	0.0368	SNTA1
	HP:0001664	hp	11	Torsade de pointes	1	0.0162	SNTA1

## Sheet: Table S3a
	Table S3a Wolf excess genes surrounding the outlier wolf-like SNPs identified based on the lowest FST differentiation between CWDs and WCAs.
	Ensembl Gene ID	Associated Gene Name	Associated Gene Name + Wiki	Chromosome Name	Gene Start (bp)	Gene End (bp)	Strand	Phenotype description	WikiGene Name	WikiGene Description	Description	Method
	ENSCAFG00000019498	CEP104	CEP104	5	58306589	58340113	-1		CEP104	centrosomal protein 104kDa	centrosomal protein 104 [Source:HGNC Symbol;Acc:HGNC:24866]	FST_SNP_wolf
	ENSCAFG00000029838			5	58327472	58340113	1					FST_SNP_wolf
	ENSCAFG00000019502	DFFB	DFFB	5	58340177	58355836	1		DFFB	DNA fragmentation factor, 40kDa, beta polypeptide (caspase-activated DNase)	DNA fragmentation factor subunit beta [Source:HGNC Symbol;Acc:HGNC:2773]	FST_SNP_wolf
	ENSCAFG00000019504	C1orf174	C1orf174	5	58358489	58366411	-1		C5H1orf174	chromosome 5 open reading frame, human C1orf174	chromosome 1 open reading frame 174 [Source:HGNC Symbol;Acc:HGNC:27915]	FST_SNP_wolf
	ENSCAFG00000019507	AJAP1	AJAP1	5	58907614	59015062	1		AJAP1	adherens junctions associated protein 1	adherens junctions associated protein 1 [Source:HGNC Symbol;Acc:HGNC:30801]	FST_SNP_wolf
	ENSCAFG00000019806	DEF8	DEF8	5	63658296	63672099	-1		DEF8	differentially expressed in FDCP 8 homolog (mouse)	differentially expressed in FDCP 8 homolog (mouse) [Source:HGNC Symbol;Acc:HGNC:25969]	FST_SNP_wolf
	ENSCAFG00000019807		TUBB3	5	63682083	63690798	-1		TUBB3	tubulin, beta 3 class III		FST_SNP_wolf
	ENSCAFG00000019808	TCF25	TCF25	5	63699996	63729665	-1		TCF25	transcription factor 25 (basic helix-loop-helix)	transcription factor 25 [Source:HGNC Symbol;Acc:HGNC:29181]	FST_SNP_wolf
	ENSCAFG00000019811	SPIRE2	SPIRE2	5	63733674	63765566	-1		SPIRE2	spire-type actin nucleation factor 2	spire type actin nucleation factor 2 [Source:HGNC Symbol;Acc:HGNC:30623]	FST_SNP_wolf
	ENSCAFG00000019818	VPS9D1	VPS9D1	5	63857893	63869417	1		VPS9D1	VPS9 domain containing 1	VPS9 domain containing 1 [Source:HGNC Symbol;Acc:HGNC:13526]	FST_SNP_wolf
	ENSCAFG00000019819	SPATA2L	SPATA2L	5	63874341	63877395	1		SPATA2L	spermatogenesis associated 2-like	spermatogenesis associated 2 like [Source:HGNC Symbol;Acc:HGNC:28393]	FST_SNP_wolf
	ENSCAFG00000019820	CDK10	CDK10	5	63879061	63886027	-1		CDK10	cyclin-dependent kinase 10	cyclin dependent kinase 10 [Source:HGNC Symbol;Acc:HGNC:1770]	FST_SNP_wolf
	ENSCAFG00000019821	SPATA33	SPATA33	5	63887596	63897373	-1				spermatogenesis associated 33 [Source:HGNC Symbol;Acc:HGNC:26463]	FST_SNP_wolf
	ENSCAFG00000019822	CHMP1A	CHMP1A	5	63897672	63905050	1		CHMP1A	charged multivesicular body protein 1A	charged multivesicular body protein 1A [Source:HGNC Symbol;Acc:HGNC:8740]	FST_SNP_wolf
	ENSCAFG00000019824	DPEP1	DPEP1	5	63909245	63915590	-1		DPEP1	dipeptidase 1 (renal)	dipeptidase 1 (renal) [Source:HGNC Symbol;Acc:HGNC:3002]	FST_SNP_wolf
	ENSCAFG00000019834	CPNE7	CPNE7	5	63950694	63978601	-1		CPNE7	copine VII	copine 7 [Source:HGNC Symbol;Acc:HGNC:2320]	FST_SNP_wolf
	ENSCAFG00000019904	KLHDC4	KLHDC4	5	65386519	65443427	1				kelch domain containing 4 [Source:HGNC Symbol;Acc:HGNC:25272]	FST_SNP_wolf
	ENSCAFG00000019906	JPH3	JPH3	5	65451179	65530336	-1		JPH3	junctophilin 3	junctophilin 3 [Source:HGNC Symbol;Acc:HGNC:14203]	FST_SNP_wolf
	ENSCAFG00000019957	KCNG4	KCNG4	5	68135779	68150522	1		KCNG4	potassium channel, voltage gated modifier subfamily G, member 4	potassium voltage-gated channel modifier subfamily G member 4 [Source:HGNC Symbol;Acc:HGNC:19697]	FST_SNP_wolf
	ENSCAFG00000019959	ADAD2	ADAD2	5	68163104	68170010	-1		ADAD2	adenosine deaminase domain containing 2	adenosine deaminase domain containing 2 [Source:HGNC Symbol;Acc:HGNC:30714]	FST_SNP_wolf
	ENSCAFG00000019962	TAF1C	TAF1C	5	68179975	68183785	1				TATA-box binding protein associated factor, RNA polymerase I subunit C [Source:HGNC Symbol;Acc:HGNC:11534]	FST_SNP_wolf
	ENSCAFG00000019964	DNAAF1	DNAAF1	5	68184243	68205951	-1		DNAAF1	dynein, axonemal, assembly factor 1	dynein (axonemal) assembly factor 1 [Source:HGNC Symbol;Acc:HGNC:30539]	FST_SNP_wolf
	ENSCAFG00000019974	CDH13	CDH13	5	68492245	69273196	-1				cadherin 13 [Source:HGNC Symbol;Acc:HGNC:1753]	FST_SNP_wolf
	ENSCAFG00000019989	PLCG2	PLCG2	5	70054658	70229323	-1		PLCG2	phospholipase C, gamma 2 (phosphatidylinositol-specific)	phospholipase C gamma 2 [Source:HGNC Symbol;Acc:HGNC:9066]	FST_SNP_wolf
	ENSCAFG00000007197	ASPH	ASPH	29	11815015	12022539	-1		ASPH	aspartate beta-hydroxylase		FST_SNP_wolf

## Sheet: Table S3b
	Table S3b Enrichment in gene ontology (GO) categories of the wolf excess genes surrounding the outlier wolf-like SNPs identified based on the lowest FST differentiation between CWDs and WCAs
	Term ID	Term type	Term group	Term name	Term depth	p-value	Q&T list
	GO:0051238	BP	3	sequestering of metal ion	1	0.00571	ASPH,JPH3,PLCG2
	GO:0043269	BP	3	regulation of ion transport	1	0.0338	ASPH,JPH3,KCNG4,PLCG2
	GO:0034762	BP	3	regulation of transmembrane transport	1	0.0134	ASPH,JPH3,KCNG4,PLCG2
	GO:0034765	BP	3	regulation of ion transmembrane transport	2	0.0116	ASPH,JPH3,KCNG4,PLCG2
	GO:1904062	BP	3	regulation of cation transmembrane transport	3	0.0264	ASPH,JPH3,PLCG2
	GO:0032845	BP	3	negative regulation of homeostatic process	1	0.0171	ASPH,JPH3,PLCG2
	GO:2000021	BP	3	regulation of ion homeostasis	1	0.0207	ASPH,JPH3,PLCG2
	GO:0060401	BP	3	cytosolic calcium ion transport	1	0.00531	ASPH,JPH3,PLCG2
	GO:0070509	BP	3	calcium ion import	1	0.0112	ASPH,JPH3,PLCG2
	GO:0070588	BP	3	calcium ion transmembrane transport	1	0.05	ASPH,JPH3,PLCG2
	GO:0051924	BP	3	regulation of calcium ion transport	1	0.0176	ASPH,JPH3,PLCG2
	GO:1903169	BP	3	regulation of calcium ion transmembrane transport	2	0.00357	ASPH,JPH3,PLCG2
	GO:1901019	BP	3	regulation of calcium ion transmembrane transporter activity	3	0.0353	JPH3,PLCG2
	GO:0051480	BP	3	regulation of cytosolic calcium ion concentration	1	0.027	ASPH,JPH3,PLCG2
	GO:0007204	BP	3	positive regulation of cytosolic calcium ion concentration	2	0.0184	ASPH,JPH3,PLCG2
	GO:0051208	BP	3	sequestering of calcium ion	1	0.00388	ASPH,JPH3,PLCG2
	GO:0051282	BP	3	regulation of sequestering of calcium ion	2	0.00372	ASPH,JPH3,PLCG2
	GO:0051283	BP	3	negative regulation of sequestering of calcium ion	3	0.00357	ASPH,JPH3,PLCG2
	GO:0060402	BP	3	calcium ion transport into cytosol	1	0.00511	ASPH,JPH3,PLCG2
	GO:1902656	BP	3	calcium ion import into cytosol	2	0.00357	ASPH,JPH3,PLCG2
	GO:0097553	BP	3	calcium ion transmembrane import into cytosol	3	0.00357	ASPH,JPH3,PLCG2
	GO:0051209	BP	3	release of sequestered calcium ion into cytosol	4	0.00357	ASPH,JPH3,PLCG2
	GO:0019932	BP	1	second-messenger-mediated signaling	1	0.0293	ASPH,JPH3,CDH13
	GO:0019722	BP	1	calcium-mediated signaling	2	0.00884	ASPH,JPH3,CDH13
	HP:0012384	hp	5	Rhinitis	1	0.0142	DNAAF1,PLCG2
	HP:0012393	hp	5	Allergy	1	0.043	PLCG2
	HP:0003193	hp	5	Allergic rhinitis	2	0.0323	PLCG2
	HP:0007362	hp	18	Aplasia/Hypoplasia of the brainstem	1	0.05	TUBB3,CHMP1A
	HP:0002365	hp	18	Hypoplasia of the brainstem	2	0.05	TUBB3,CHMP1A
	HP:0001089	hp	13	Iris atrophy	1	0.0215	ASPH
	HP:0004684	hp	12	Talipes valgus	1	0.043	CHMP1A
	HP:0100281	hp	20	Chronic colitis	1	0.0215	PLCG2
	HP:0100279	hp	20	Ulcerative colitis	2	0.0215	PLCG2

## Sheet: Table S3c
	Table S3c Dog excess genes surrounding the outlier dog-like SNPs identified based on the lowest FST differentiation between CWDs and GShs
	Ensembl Gene ID	Associated Gene Name	Associated Gene Name + Wiki	Chromosome Name	Gene Start (bp)	Gene End (bp)	Strand	Phenotype description	WikiGene Name	WikiGene Description	Description	Method
	ENSCAFG00000000011	NFATC1	NFATC1	1	1026337	1120990	-1		NFATC1	nuclear factor of activated T-cells, cytoplasmic, calcineurin-dependent 1	nuclear factor of activated T-cells 1 [Source:HGNC Symbol;Acc:HGNC:7775]	FST_SNP_dog
	ENSCAFG00000000020	TSHZ1	TSHZ1	1	4226210	4231399	-1		TSHZ1	teashirt zinc finger homeobox 1	teashirt zinc finger homeobox 1 [Source:HGNC Symbol;Acc:HGNC:10669]	FST_SNP_dog
	ENSCAFG00000000021	ZADH2	ZADH2	1	4303857	4311455	1		ZADH2	zinc binding alcohol dehydrogenase domain containing 2	zinc binding alcohol dehydrogenase domain containing 2 [Source:HGNC Symbol;Acc:HGNC:28697]	FST_SNP_dog
	ENSCAFG00000000032	CBLN2	CBLN2	1	6378248	6382024	1				cerebellin 2 precursor [Source:HGNC Symbol;Acc:HGNC:1544]	FST_SNP_dog
	ENSCAFG00000000058	SERPINB8	SERPINB8	1	13213440	13223912	-1		LOC607205	serpin B8	serpin family B member 8 [Source:HGNC Symbol;Acc:HGNC:8952]	FST_SNP_dog
	ENSCAFG00000023582	SERPINB10	SERPINB10	1	13233353	13256253	-1		SERPINB10	serpin peptidase inhibitor, clade B (ovalbumin), member 10	serpin family B member 10 [Source:HGNC Symbol;Acc:HGNC:8942]	FST_SNP_dog
	ENSCAFG00000000059	SERPINB2	SERPINB2	1	13260225	13276808	-1		SERPINB2	serpin peptidase inhibitor, clade B (ovalbumin), member 2	serpin family B member 2 [Source:HGNC Symbol;Acc:HGNC:8584]	FST_SNP_dog
	ENSCAFG00000000372	UST	UST	1	39633049	39922991	1		UST	uronyl-2-sulfotransferase	uronyl 2-sulfotransferase [Source:HGNC Symbol;Acc:HGNC:17223]	FST_SNP_dog
	ENSCAFG00000000419	AKAP12	AKAP12	1	41614908	41711677	1		AKAP12	A kinase (PRKA) anchor protein 12	A-kinase anchoring protein 12 [Source:HGNC Symbol;Acc:HGNC:370]	FST_SNP_dog
	ENSCAFG00000000421			1	41692376	41693699	-1					FST_SNP_dog
	ENSCAFG00000000422	ZBTB2	ZBTB2	1	41718419	41743392	-1				zinc finger and BTB domain containing 2 [Source:HGNC Symbol;Acc:HGNC:20868]	FST_SNP_dog
	ENSCAFG00000000423	RMND1	RMND1	1	41755054	41799847	-1				required for meiotic nuclear division 1 homolog [Source:HGNC Symbol;Acc:HGNC:21176]	FST_SNP_dog
	ENSCAFG00000000562		CNKSR3	1	44071408	44361145	-1		CNKSR3	CNKSR family member 3		FST_SNP_dog
	ENSCAFG00000000616	TMEM242	TMEM242	1	46872565	46900911	-1		TMEM242	transmembrane protein 242	transmembrane protein 242 [Source:HGNC Symbol;Acc:HGNC:17206]	FST_SNP_dog
	ENSCAFG00000000955	TBC1D32	TBC1D32	1	60667860	60873614	-1		TBC1D32	TBC1 domain family, member 32	TBC1 domain family member 32 [Source:HGNC Symbol;Acc:HGNC:21485]	FST_SNP_dog
	ENSCAFG00000001026			1	63562209	63852095	1					FST_SNP_dog
	ENSCAFG00000001101	PTPRK	PTPRK	1	66594435	67022632	-1		PTPRK	protein tyrosine phosphatase, receptor type, K	protein tyrosine phosphatase, receptor type K [Source:HGNC Symbol;Acc:HGNC:9674]	FST_SNP_dog
	ENSCAFG00000001890	MAMDC2	MAMDC2	1	87302988	87451037	-1		MAMDC2	MAM domain containing 2	MAM domain containing 2 [Source:HGNC Symbol;Acc:HGNC:23673]	FST_SNP_dog
	ENSCAFG00000023033	PCDHAC2	PCDHAC2	2	36046626	36097076	1		LOC478037	protocadherin alpha-C2	protocadherin alpha subfamily C, 2 [Source:HGNC Symbol;Acc:HGNC:8677]	FST_SNP_dog
	ENSCAFG00000006229	PCDH1	PCDH1	2	36813586	36836467	-1		PCDH1	protocadherin 1	protocadherin 1 [Source:HGNC Symbol;Acc:HGNC:8655]	FST_SNP_dog
	ENSCAFG00000006236	KIAA0141	KIAA0141	2	36865402	36883751	1		KIAA0141	KIAA0141 ortholog	KIAA0141 [Source:HGNC Symbol;Acc:HGNC:28969]	FST_SNP_dog
	ENSCAFG00000006239	PCDH12	PCDH12	2	36884165	36900729	-1		PCDH12	protocadherin 12	protocadherin 12 [Source:HGNC Symbol;Acc:HGNC:8657]	FST_SNP_dog
	ENSCAFG00000007626	PIK3R1	PIK3R1	2	53456217	53528489	1		PIK3R1	phosphoinositide-3-kinase, regulatory subunit 1 (alpha)	phosphoinositide-3-kinase regulatory subunit 1 [Source:HGNC Symbol;Acc:HGNC:8979]	FST_SNP_dog
	ENSCAFG00000008706	ADGRG5	ADGRG5	2	58875289	58888989	-1		ADGRG5	adhesion G protein-coupled receptor G5	adhesion G protein-coupled receptor G5 [Source:HGNC Symbol;Acc:HGNC:19010]	FST_SNP_dog
	ENSCAFG00000008709	CCDC102A	CCDC102A	2	58906887	58922770	1				coiled-coil domain containing 102A [Source:HGNC Symbol;Acc:HGNC:28097]	FST_SNP_dog
	ENSCAFG00000008740	CIAPIN1	CIAPIN1	2	58982838	58992152	1		CIAPIN1	cytokine induced apoptosis inhibitor 1	cytokine induced apoptosis inhibitor 1 [Source:HGNC Symbol;Acc:HGNC:28050]	FST_SNP_dog
	ENSCAFG00000008754	CCL17	CCL17	2	59001473	59005737	-1		CCL17	chemokine (C-C motif) ligand 17	C-C motif chemokine 17 [Source:UniProtKB/Swiss-Prot;Acc:Q95N01]	FST_SNP_dog
	ENSCAFG00000008761	CX3CL1	CX3CL1	2	59022916	59032778	-1				C-X3-C motif chemokine ligand 1 [Source:HGNC Symbol;Acc:HGNC:10647]	FST_SNP_dog
	ENSCAFG00000032287	CCL22	CCL22	2	59039616	59045465	-1		CCL22	chemokine (C-C motif) ligand 22	C-C motif chemokine ligand 22 [Source:HGNC Symbol;Acc:HGNC:10621]	FST_SNP_dog
	ENSCAFG00000007265			2	64349643	64351549	-1					FST_SNP_dog
	ENSCAFG00000007759	LIX1	LIX1	3	12581677	12630650	1		LIX1	limb and CNS expressed 1	limb and CNS expressed 1 [Source:HGNC Symbol;Acc:HGNC:18581]	FST_SNP_dog
	ENSCAFG00000032035		LOC102153214	3	12638733	12659893	-1		LOC102153214	2'-5'-oligoadenylate synthase 3-like		FST_SNP_dog
	ENSCAFG00000032125			3	12678177	12678581	1					FST_SNP_dog
	ENSCAFG00000007770	LNPEP	LNPEP	3	12681688	12766748	-1		LNPEP	leucyl/cystinyl aminopeptidase	leucyl/cystinyl aminopeptidase [Source:HGNC Symbol;Acc:HGNC:6656]	FST_SNP_dog
	ENSCAFG00000032342	PDGFD	PDGFD	5	27863727	28094382	1		PDGFD	platelet derived growth factor D	platelet derived growth factor D [Source:HGNC Symbol;Acc:HGNC:30620]	FST_SNP_dog
	ENSCAFG00000011395	NCF1	NCF1	6	5700832	5719439	-1		NCF1	neutrophil cytosolic factor 1	neutrophil cytosolic factor 1 [Source:HGNC Symbol;Acc:HGNC:7660]	FST_SNP_dog
	ENSCAFG00000011514	GTF2I	GTF2I	6	5722967	5811965	-1		GTF2I	general transcription factor IIi	general transcription factor IIi [Source:HGNC Symbol;Acc:HGNC:4659]	FST_SNP_dog
	ENSCAFG00000024307	RPL37	RPL37	6	5819091	5819384	1		RPL37	60S ribosomal protein L37	60S ribosomal protein L37 [Source:RefSeq peptide;Acc:NP_001239158]	FST_SNP_dog
	ENSCAFG00000029042			6	5843958	5844197	1					FST_SNP_dog
	ENSCAFG00000017787		LOC479816	6	23657104	23989902	-1		LOC479816	ATP-binding cassette sub-family A member 3-like		FST_SNP_dog
	ENSCAFG00000023577		LOC489979	6	23862696	24209012	-1		LOC489979	ATP-binding cassette sub-family A member 3-like		FST_SNP_dog
	ENSCAFG00000029669			6	23944992	23946175	-1					FST_SNP_dog
	ENSCAFG00000020429	DEPDC1	DEPDC1	6	76848106	76866948	1		DEPDC1	DEP domain containing 1	DEP domain containing 1 [Source:HGNC Symbol;Acc:HGNC:22949]	FST_SNP_dog
	ENSCAFG00000020431	RPE65	RPE65	6	76887399	76911146	1	Leber congenital amaurosis (congenital stationary night blindness)	RPE65	retinal pigment epithelium-specific protein 65kDa	retinal pigment epithelium-specific protein 65kDa [Source:HGNC Symbol;Acc:HGNC:10294]	FST_SNP_dog
	ENSCAFG00000013655	HMCN1	HMCN1	7	18797748	19255876	1		HMCN1	hemicentin 1	hemicentin 1 [Source:HGNC Symbol;Acc:HGNC:19194]	FST_SNP_dog
	ENSCAFG00000013814	FAM163A	FAM163A	7	20151401	20152463	-1		FAM163A	family with sequence similarity 163, member A	family with sequence similarity 163 member A [Source:HGNC Symbol;Acc:HGNC:28274]	FST_SNP_dog
	ENSCAFG00000014301	TNR	TNR	7	24042099	24122530	1				tenascin R [Source:HGNC Symbol;Acc:HGNC:11953]	FST_SNP_dog
	ENSCAFG00000030693	KIAA0040	KIAA0040	7	24235021	24235323	1		KIAA0040	KIAA0040 ortholog	KIAA0040 [Source:HGNC Symbol;Acc:HGNC:28950]	FST_SNP_dog
	ENSCAFG00000014353	TNN	TNN	7	24246058	24308447	-1		TNN	tenascin N	tenascin N [Source:HGNC Symbol;Acc:HGNC:22942]	FST_SNP_dog
	ENSCAFG00000014370		MRPS14	7	24342458	24368216	1		MRPS14	mitochondrial ribosomal protein S14		FST_SNP_dog
	ENSCAFG00000029016	CACYBP	CACYBP	7	24369223	24383926	-1				calcyclin binding protein [Source:HGNC Symbol;Acc:HGNC:30423]	FST_SNP_dog
	ENSCAFG00000014549	KLHL20	KLHL20	7	25429425	25484264	-1		KLHL20	kelch-like family member 20	kelch like family member 20 [Source:HGNC Symbol;Acc:HGNC:25056]	FST_SNP_dog
	ENSCAFG00000014558	ANKRD45	ANKRD45	7	25508436	25560122	1		ANKRD45	ankyrin repeat domain 45	ankyrin repeat domain 45 [Source:HGNC Symbol;Acc:HGNC:24786]	FST_SNP_dog
	ENSCAFG00000032496			7	25536534	25538512	-1					FST_SNP_dog
	ENSCAFG00000031705			9	3170609	3171535	-1					FST_SNP_dog
	ENSCAFG00000030116			9	3170820	3171536	1					FST_SNP_dog
	ENSCAFG00000011236	AXIN2	AXIN2	9	14560751	14589002	1		AXIN2	axin 2	axin 2 [Source:HGNC Symbol;Acc:HGNC:904]	FST_SNP_dog
	ENSCAFG00000002287	TXNDC9	TXNDC9	10	43346318	43355979	1		TXNDC9	thioredoxin domain containing 9	thioredoxin domain containing 9 [Source:HGNC Symbol;Acc:HGNC:24110]	FST_SNP_dog
	ENSCAFG00000002291	LYG1	LYG1	10	43399980	43420138	1		LYG1	lysozyme G-like 1	lysozyme g1 [Source:HGNC Symbol;Acc:HGNC:27014]	FST_SNP_dog
	ENSCAFG00000002499	DYNC2LI1	DYNC2LI1	10	46231038	46269919	1		DYNC2LI1	dynein, cytoplasmic 2, light intermediate chain 1	dynein cytoplasmic 2 light intermediate chain 1 [Source:HGNC Symbol;Acc:HGNC:24595]	FST_SNP_dog
	ENSCAFG00000002504	ABCG5	ABCG5	10	46272962	46299773	-1		ABCG5	ATP-binding cassette, sub-family G (WHITE), member 5	ATP binding cassette subfamily G member 5 [Source:HGNC Symbol;Acc:HGNC:13886]	FST_SNP_dog
	ENSCAFG00000002518	ABCG8	ABCG8	10	46299559	46319695	1		ABCG8	ATP-binding cassette, sub-family G (WHITE), member 8	ATP binding cassette subfamily G member 8 [Source:HGNC Symbol;Acc:HGNC:13887]	FST_SNP_dog
	ENSCAFG00000002527	LRPPRC	LRPPRC	10	46325244	46438559	-1		LRPPRC	leucine-rich pentatricopeptide repeat containing	leucine rich pentatricopeptide repeat containing [Source:HGNC Symbol;Acc:HGNC:15714]	FST_SNP_dog
	ENSCAFG00000002535	PPM1B	PPM1B	10	46590015	46664245	1		PPM1B	protein phosphatase, Mg2+/Mn2+ dependent, 1B	protein phosphatase, Mg2+/Mn2+ dependent 1B [Source:HGNC Symbol;Acc:HGNC:9276]	FST_SNP_dog
	ENSCAFG00000029566			10	54986137	54986552	1					FST_SNP_dog
	ENSCAFG00000002894	AKAP2	AKAP2	11	64842169	65176658	1		AKAP2	A kinase (PRKA) anchor protein 2	A-kinase anchoring protein 2 [Source:HGNC Symbol;Acc:HGNC:372]	FST_SNP_dog
	ENSCAFG00000001613	MED20	MED20	12	10570664	10578102	-1		MED20	mediator complex subunit 20	mediator complex subunit 20 [Source:HGNC Symbol;Acc:HGNC:16840]	FST_SNP_dog
	ENSCAFG00000001614	BYSL	BYSL	12	10581217	10591597	1		BYSL	bystin-like	bystin like [Source:HGNC Symbol;Acc:HGNC:1157]	FST_SNP_dog
	ENSCAFG00000001618	CCND3	CCND3	12	10594818	10600891	-1				cyclin D3 [Source:HGNC Symbol;Acc:HGNC:1585]	FST_SNP_dog
	ENSCAFG00000001622	TAF8	TAF8	12	10689289	10713596	1		TAF8	TAF8 RNA polymerase II, TATA box binding protein (TBP)-associated factor, 43kDa	TATA-box binding protein associated factor 8 [Source:HGNC Symbol;Acc:HGNC:17300]	FST_SNP_dog
	ENSCAFG00000031768	C6orf132	C6orf132	12	10735442	10765502	-1		C12H6orf132	chromosome 12 open reading frame, human C6orf132	chromosome 6 open reading frame 132 [Source:HGNC Symbol;Acc:HGNC:21288]	FST_SNP_dog
	ENSCAFG00000031208			12	10764926	10782818	1					FST_SNP_dog
	ENSCAFG00000001631	GUCA1A	GUCA1A	12	10788656	10795391	1		GUCA1A	guanylate cyclase activator 1A (retina)	guanylate cyclase activator 1A [Source:HGNC Symbol;Acc:HGNC:4678]	FST_SNP_dog
	ENSCAFG00000001633	GUCA1B	GUCA1B	12	10798041	10806651	-1		GUCA1B	guanylate cyclase activator 1B (retina)	guanylate cyclase activator 1B [Source:HGNC Symbol;Acc:HGNC:4679]	FST_SNP_dog
[truncated: 160 more rows]

## Sheet: Table S3d
	Table S3d Enrichment in gene ontology (GO) categories of the dog excess genes surrounding the outlier dog-like SNPs identified based on the lowest FST differentiation between CWDs and GShs.
[truncated: 2 more rows]

[truncated: 12 more sheets: Table S4a, Table S4b, Table S4c, Table S4d, Table_S5a, Table_S5b, Table S5c, Table S5d, Table S6a, Table S6b, Table S6c, Table S6d]
